# Supplementary material for: Omics approaches in Allium research: Progress and way ahead
Source: PeerJ. 2020 Sep 9;8:e9824. doi: 10.7717/peerj.9824 (PMC7486827; doi:10.7717/peerj.9824)
Supplement: Supplemental Information 1 [file peerj-08-9824-s001.xlsx]

## Sheet: WRKY
ID	DB	AC	Annotation
CL2076.Contig1_DHA_Bulb	TAIR	AT1G04640.2	| Symbols: LIP2 | lipoyltransferase 2 | chr1:1292541-1293248 FORWARD LENGTH=235
	IRGSP	Os03t0321800-02	Similar to WRKY transcription factor 55.
	nr	ref|XP_002525976.1|	lipoate-protein ligase B, putative [Ricinus communis] gi|223534708|gb|EEF36400.1| lipoate-protein ligase B, putative [Ricinus communis]
CL3035.Contig1_DHA_Bulb	TAIR	AT1G29280.1	| Symbols: WRKY65, ATWRKY65 | WRKY DNA-binding protein 65 | chr1:10236589-10237467 FORWARD LENGTH=259
	IRGSP	Os01t0730700-01	WRKY transcription factor 14 (WRKY14).
	nr	ref|XP_002269267.1|	PREDICTED: probable WRKY transcription factor 65 [Vitis vinifera] gi|297740534|emb|CBI30716.3| unnamed protein product [Vitis vinifera]
CL3035.Contig2_DHA_Bulb	TAIR	AT1G29280.1	| Symbols: WRKY65, ATWRKY65 | WRKY DNA-binding protein 65 | chr1:10236589-10237467 FORWARD LENGTH=259
	IRGSP	Os01t0750100-03	Similar to WRKY13 transcription factor.
	nr	ref|XP_002269267.1|	PREDICTED: probable WRKY transcription factor 65 [Vitis vinifera] gi|297740534|emb|CBI30716.3| unnamed protein product [Vitis vinifera]
CL3035.Contig3_DHA_Bulb	TAIR	AT1G29280.1	| Symbols: WRKY65, ATWRKY65 | WRKY DNA-binding protein 65 | chr1:10236589-10237467 FORWARD LENGTH=259
	IRGSP	Os01t0750100-03	Similar to WRKY13 transcription factor.
	nr	ref|XP_002269267.1|	PREDICTED: probable WRKY transcription factor 65 [Vitis vinifera] gi|297740534|emb|CBI30716.3| unnamed protein product [Vitis vinifera]
CL3035.Contig4_DHA_Bulb	TAIR	AT1G29280.1	| Symbols: WRKY65, ATWRKY65 | WRKY DNA-binding protein 65 | chr1:10236589-10237467 FORWARD LENGTH=259
	IRGSP	Os01t0750100-03	Similar to WRKY13 transcription factor.
	nr	ref|XP_002269267.1|	PREDICTED: probable WRKY transcription factor 65 [Vitis vinifera] gi|297740534|emb|CBI30716.3| unnamed protein product [Vitis vinifera]
CL3422.Contig1_DHA_Bulb	TAIR	AT5G56270.1	| Symbols: WRKY2, ATWRKY2 | WRKY DNA-binding protein 2 | chr5:22780816-22783137 FORWARD LENGTH=687
	IRGSP	Os04t0471700-00	Similar to WRKY10 (WRKY transcription factor 35).
	nr	gb|AER70305.1|	WRKY transcription factor [(Populus tomentosa x P. bolleana) x P. tomentosa]
CL3992.Contig1_DHA_Bulb	TAIR	AT1G80840.1	| Symbols: WRKY40, ATWRKY40 | WRKY DNA-binding protein 40 | chr1:30383834-30385356 FORWARD LENGTH=302
	IRGSP	Os09t0417600-02	WRKY transcription factor 76.
	nr	gb|EOY26053.1|	WRKY DNA-binding protein 40, putative isoform 2 [Theobroma cacao]
CL407.Contig1_DHA_Bulb	TAIR	AT1G13960.1	| Symbols: WRKY4 | WRKY DNA-binding protein 4 | chr1:4776622-4779043 FORWARD LENGTH=514
	IRGSP	Os12t0507300-00	Similar to WRKY DNA binding domain containing protein, expressed.
	nr	gb|AAT46067.1|	DNA binding protein WRKY2 [Vitis vinifera]
CL407.Contig2_DHA_Bulb	TAIR	AT2G03340.1	| Symbols: WRKY3 | WRKY DNA-binding protein 3 | chr2:1014724-1016936 REVERSE LENGTH=513
	IRGSP	Os12t0507300-00	Similar to WRKY DNA binding domain containing protein, expressed.
	nr	dbj|BAJ16351.1|	hypothetical protein [Papaver somniferum]
CL5898.Contig1_DHA_Bulb	TAIR	AT3G04670.1	| Symbols: WRKY39, ATWRKY39 | WRKY DNA-binding protein 39 | chr3:1266530-1267691 REVERSE LENGTH=330
	IRGSP	Os12t0597700-01	Similar to WRKY2 (Fragment).
	nr	ref|XP_002520995.1|	WRKY transcription factor, putative [Ricinus communis] gi|223539832|gb|EEF41412.1| WRKY transcription factor, putative [Ricinus communis]
CL5898.Contig2_DHA_Bulb	TAIR	AT3G04670.2	| Symbols: WRKY39, ATWRKY39 | WRKY DNA-binding protein 39 | chr3:1266737-1267691 REVERSE LENGTH=290
	IRGSP	Os12t0597700-01	Similar to WRKY2 (Fragment).
	nr	ref|XP_002520995.1|	WRKY transcription factor, putative [Ricinus communis] gi|223539832|gb|EEF41412.1| WRKY transcription factor, putative [Ricinus communis]
CL618.Contig1_DHA_Bulb	TAIR	AT5G56270.1	| Symbols: WRKY2, ATWRKY2 | WRKY DNA-binding protein 2 | chr5:22780816-22783137 FORWARD LENGTH=687
	IRGSP	Os03t0657400-00	Hypothetical conserved gene.
	nr	ref|NP_001050814.2|	Os03g0657400 [Oryza sativa Japonica Group] gi|46394374|tpg|DAA05125.1| TPA_inf: WRKY transcription factor 60 [Oryza sativa (indica cultivar-group)] gi|125545112|gb|EAY91251.1| hypothetical protein OsI_12866 [Oryza sativa Indica Group] gi|255674758|dbj|BAF12728.2| Os03g0657400 [Oryza sativa Japonica Group]
CL618.Contig2_DHA_Bulb	TAIR	AT5G56270.1	| Symbols: WRKY2, ATWRKY2 | WRKY DNA-binding protein 2 | chr5:22780816-22783137 FORWARD LENGTH=687
	IRGSP	Os03t0657400-00	Hypothetical conserved gene.
	nr	ref|NP_001050814.2|	Os03g0657400 [Oryza sativa Japonica Group] gi|46394374|tpg|DAA05125.1| TPA_inf: WRKY transcription factor 60 [Oryza sativa (indica cultivar-group)] gi|125545112|gb|EAY91251.1| hypothetical protein OsI_12866 [Oryza sativa Indica Group] gi|255674758|dbj|BAF12728.2| Os03g0657400 [Oryza sativa Japonica Group]
CL644.Contig1_DHA_Bulb	TAIR	AT5G56270.1	| Symbols: WRKY2, ATWRKY2 | WRKY DNA-binding protein 2 | chr5:22780816-22783137 FORWARD LENGTH=687
	IRGSP	Os09t0481700-02	SUSIBA2-like (WRKY transcription factor 80).
	nr	gb|EOY11828.1|	WRKY DNA-binding protein 2 isoform 3 [Theobroma cacao] gi|508719932|gb|EOY11829.1| WRKY DNA-binding protein 2 isoform 3 [Theobroma cacao]
CL6595.Contig1_DHA_Bulb	TAIR	AT3G56400.1	| Symbols: WRKY70, ATWRKY70 | WRKY DNA-binding protein 70 | chr3:20909082-20910409 REVERSE LENGTH=294
	IRGSP	Os05t0478700-00	Hypothetical conserved gene.
	nr	gb|EAY76297.1|	hypothetical protein OsI_04231 [Oryza sativa Indica Group]
CL961.Contig1_DHA_Bulb	TAIR	AT2G38470.1	| Symbols: WRKY33, ATWRKY33 | WRKY DNA-binding protein 33 | chr2:16108476-16110539 FORWARD LENGTH=519
	IRGSP	Os05t0343400-01	WRKY transcription factor 53 (Transcription factor WRKY12).
	nr	ref|XP_004241755.1|	PREDICTED: probable WRKY transcription factor 33-like [Solanum lycopersicum]
CL961.Contig2_DHA_Bulb	TAIR	AT2G38470.1	| Symbols: WRKY33, ATWRKY33 | WRKY DNA-binding protein 33 | chr2:16108476-16110539 FORWARD LENGTH=519
	IRGSP	Os05t0343400-01	WRKY transcription factor 53 (Transcription factor WRKY12).
	nr	dbj|BAI63296.1|	double WRKY type transfactor [Nicotiana benthamiana]
Unigene11795_DHA_Bulb	TAIR	AT4G26640.2	| Symbols: WRKY20, AtWRKY20 | WRKY family transcription factor family protein | chr4:13437298-13440693 REVERSE LENGTH=557
	IRGSP	Os07t0583700-01	WRKY transcription factor 78.
	nr	gb|EAZ04490.1|	hypothetical protein OsI_26641 [Oryza sativa Indica Group]
Unigene13718_DHA_Bulb	TAIR	AT3G56400.1	| Symbols: WRKY70, ATWRKY70 | WRKY DNA-binding protein 70 | chr3:20909082-20910409 REVERSE LENGTH=294
	IRGSP	Os11t0116900-01	Similar to WRKY DNA binding domain containing protein, expressed.
	nr	ref|NP_001065590.1|	Os11g0116900 [Oryza sativa Japonica Group] gi|113644294|dbj|BAF27435.1| Os11g0116900, partial [Oryza sativa Japonica Group]
Unigene15608_DHA_Bulb	TAIR	AT4G39410.1	| Symbols: WRKY13, ATWRKY13 | WRKY DNA-binding protein 13 | chr4:18332937-18334789 REVERSE LENGTH=304
	IRGSP	Os01t0182700-01	Similar to WRKY12.
	nr	ref|XP_004288129.1|	PREDICTED: probable WRKY transcription factor 13-like [Fragaria vesca subsp. vesca]
Unigene16485_DHA_Bulb	TAIR	AT5G43290.1	| Symbols: WRKY49, ATWRKY49 | WRKY DNA-binding protein 49 | chr5:17371987-17373083 REVERSE LENGTH=274
	IRGSP	Os01t0972800-01	WRKY1 (WRKY transcription factor 17).
	nr	ref|XP_003567529.1|	PREDICTED: uncharacterized protein LOC100839602 [Brachypodium distachyon]
Unigene16486_DHA_Bulb	TAIR	AT5G43290.1	| Symbols: WRKY49, ATWRKY49 | WRKY DNA-binding protein 49 | chr5:17371987-17373083 REVERSE LENGTH=274
	IRGSP	Os01t0972800-01	WRKY1 (WRKY transcription factor 17).
	nr	gb|EOY07490.1|	WRKY DNA-binding protein 49, putative [Theobroma cacao]
Unigene19723_DHA_Bulb	TAIR	AT5G52830.1	| Symbols: WRKY27, ATWRKY27 | WRKY DNA-binding protein 27 | chr5:21410996-21412218 FORWARD LENGTH=348
	IRGSP	Os02t0265200-01	WRKY transcription factor 39.
	nr	ref|NP_001237508.1|	transcription factor [Glycine max] gi|166203223|gb|ABY84652.1| transcription factor [Glycine max]
Unigene21968_DHA_Bulb	TAIR	AT5G56270.1	| Symbols: WRKY2, ATWRKY2 | WRKY DNA-binding protein 2 | chr5:22780816-22783137 FORWARD LENGTH=687
	IRGSP	Os12t0507300-00	Similar to WRKY DNA binding domain containing protein, expressed.
	nr	emb|CBI39865.3|	unnamed protein product [Vitis vinifera]
Unigene23047_DHA_Bulb	TAIR	AT5G64810.1	| Symbols: WRKY51, ATWRKY51 | WRKY DNA-binding protein 51 | chr5:25908415-25909687 FORWARD LENGTH=194
	IRGSP	Os05t0537100-00	WRKY transcription factor 10.
	nr	ref|XP_002440147.1|	hypothetical protein SORBIDRAFT_09g026830 [Sorghum bicolor] gi|241945432|gb|EES18577.1| hypothetical protein SORBIDRAFT_09g026830 [Sorghum bicolor]
Unigene23138_DHA_Bulb	TAIR	AT2G38470.1	| Symbols: WRKY33, ATWRKY33 | WRKY DNA-binding protein 33 | chr2:16108476-16110539 FORWARD LENGTH=519
	IRGSP	Os01t0826400-01	WRKY transcription factor 24 (WRKY24).
	nr	gb|EMJ09489.1|	hypothetical protein PRUPE_ppa003333mg [Prunus persica]
Unigene23139_DHA_Bulb	TAIR	AT2G38470.1	| Symbols: WRKY33, ATWRKY33 | WRKY DNA-binding protein 33 | chr2:16108476-16110539 FORWARD LENGTH=519
	IRGSP	Os01t0826400-01	WRKY transcription factor 24 (WRKY24).
	nr	gb|EOY34631.1|	WRKY DNA-binding protein 33 isoform 1 [Theobroma cacao]
Unigene23140_DHA_Bulb	TAIR	AT2G38470.1	| Symbols: WRKY33, ATWRKY33 | WRKY DNA-binding protein 33 | chr2:16108476-16110539 FORWARD LENGTH=519
	IRGSP	Os05t0343400-01	WRKY transcription factor 53 (Transcription factor WRKY12).
	nr	gb|EMJ09489.1|	hypothetical protein PRUPE_ppa003333mg [Prunus persica]
Unigene24342_DHA_Bulb	TAIR	AT3G29185.2	| Symbols: | Domain of unknown function (DUF3598) | chr3:11155092-11157207 REVERSE LENGTH=411
	IRGSP	--No_Hits--
	nr	gb|AEO31475.1|	WRKY transcription factor 11-2 [Dimocarpus longan]
Unigene25041_DHA_Bulb	TAIR	AT3G56400.1	| Symbols: WRKY70, ATWRKY70 | WRKY DNA-binding protein 70 | chr3:20909082-20910409 REVERSE LENGTH=294
	IRGSP	Os05t0478400-00	Similar to WRKY transcription factor 48.
	nr	gb|EOY04438.1|	WRKY DNA-binding protein 70, putative isoform 1 [Theobroma cacao]
Unigene27469_DHA_Bulb	TAIR	AT3G56400.1	| Symbols: WRKY70, ATWRKY70 | WRKY DNA-binding protein 70 | chr3:20909082-20910409 REVERSE LENGTH=294
	IRGSP	Os05t0322900-01	Similar to WRKY transcription factor 45.
	nr	ref|XP_003566383.1|	PREDICTED: uncharacterized protein LOC100836752 [Brachypodium distachyon]
Unigene27522_DHA_Bulb	TAIR	AT4G31550.2	| Symbols: WRKY11, ATWRKY11 | WRKY DNA-binding protein 11 | chr4:15290065-15291458 REVERSE LENGTH=324
	IRGSP	Os04t0287400-01	Similar to WRKY transcription factor 51.
	nr	emb|CBI17876.3|	unnamed protein product [Vitis vinifera]
Unigene27891_DHA_Bulb	TAIR	AT1G80840.1	| Symbols: WRKY40, ATWRKY40 | WRKY DNA-binding protein 40 | chr1:30383834-30385356 FORWARD LENGTH=302
	IRGSP	Os06t0649000-02	Similar to WRKY transcription factor 28.
	nr	gb|ADU02585.1|	WRKY transcription factor 4 [Vitis vinifera]
Unigene28942_DHA_Bulb	TAIR	AT5G49520.1	| Symbols: WRKY48, ATWRKY48 | WRKY DNA-binding protein 48 | chr5:20090890-20092867 FORWARD LENGTH=399
	IRGSP	Os05t0565900-00	DNA-binding WRKY domain containing protein.
	nr	ref|XP_002279385.1|	PREDICTED: probable WRKY transcription factor 48 [Vitis vinifera] gi|296083226|emb|CBI22862.3| unnamed protein product [Vitis vinifera]
Unigene29605_DHA_Bulb	TAIR	AT5G13080.1	| Symbols: WRKY75, ATWRKY75 | WRKY DNA-binding protein 75 | chr5:4149928-4151019 REVERSE LENGTH=145
	IRGSP	Os11t0490900-01	Similar to WRKY transcription factor 72.
	nr	tpg|DAA41982.1|	TPA: putative WRKY DNA-binding domain superfamily protein [Zea mays]
Unigene30395_DHA_Bulb	TAIR	AT4G22070.1	| Symbols: WRKY31, ATWRKY31 | WRKY DNA-binding protein 31 | chr4:11691381-11694234 REVERSE LENGTH=538
	IRGSP	Os05t0137500-00	Similar to WRKY transcription factor 5.
	nr	gb|EOY28756.1|	WRKY family transcription factor [Theobroma cacao]
Unigene31806_DHA_Bulb	TAIR	AT2G03340.1	| Symbols: WRKY3 | WRKY DNA-binding protein 3 | chr2:1014724-1016936 REVERSE LENGTH=513
	IRGSP	Os07t0583700-01	WRKY transcription factor 78.
	nr	ref|XP_002445223.1|	hypothetical protein SORBIDRAFT_07g006230 [Sorghum bicolor] gi|241941573|gb|EES14718.1| hypothetical protein SORBIDRAFT_07g006230 [Sorghum bicolor]
Unigene32188_DHA_Bulb	TAIR	AT1G04640.2	| Symbols: LIP2 | lipoyltransferase 2 | chr1:1292541-1293248 FORWARD LENGTH=235
	IRGSP	Os03t0321800-02	Similar to WRKY transcription factor 55.
	nr	ref|XP_002297668.1|	predicted protein [Populus trichocarpa] gi|222844926|gb|EEE82473.1| predicted protein [Populus trichocarpa]
Unigene32931_DHA_Bulb	TAIR	AT5G07100.2	| Symbols: WRKY26 | WRKY DNA-binding protein 26 | chr5:2204813-2205647 FORWARD LENGTH=216
	IRGSP	Os12t0507300-00	Similar to WRKY DNA binding domain containing protein, expressed.
	nr	ref|XP_003625561.1|	WRKY transcription factor [Medicago truncatula] gi|355500576|gb|AES81779.1| WRKY transcription factor [Medicago truncatula]
Unigene33017_DHA_Bulb	TAIR	AT2G34830.1	| Symbols: WRKY35, MEE24, AtWRKY35 | WRKY DNA-binding protein 35 | chr2:14693839-14696378 REVERSE LENGTH=427
	IRGSP	Os04t0597300-01	Similar to WERKY protein (Fragment).
	nr	gb|EMJ13031.1|	hypothetical protein PRUPE_ppa004535mg [Prunus persica]
Unigene33058_DHA_Bulb	TAIR	AT4G39410.1	| Symbols: WRKY13, ATWRKY13 | WRKY DNA-binding protein 13 | chr4:18332937-18334789 REVERSE LENGTH=304
	IRGSP	Os01t0182700-01	Similar to WRKY12.
	nr	ref|NP_001042221.1|	Os01g0182700 [Oryza sativa Japonica Group] gi|113531752|dbj|BAF04135.1| Os01g0182700 [Oryza sativa Japonica Group]
Unigene33518_DHA_Bulb	TAIR	AT5G56270.1	| Symbols: WRKY2, ATWRKY2 | WRKY DNA-binding protein 2 | chr5:22780816-22783137 FORWARD LENGTH=687
	IRGSP	Os09t0481700-02	SUSIBA2-like (WRKY transcription factor 80).
	nr	ref|XP_002529203.1|	conserved hypothetical protein [Ricinus communis] gi|223531321|gb|EEF33159.1| conserved hypothetical protein [Ricinus communis]
Unigene34654_DHA_Bulb	TAIR	AT2G34830.1	| Symbols: WRKY35, MEE24, AtWRKY35 | WRKY DNA-binding protein 35 | chr2:14693839-14696378 REVERSE LENGTH=427
	IRGSP	Os04t0597300-01	Similar to WERKY protein (Fragment).
	nr	gb|EOY25617.1|	WRKY DNA-binding protein 14, putative [Theobroma cacao]
Unigene34907_DHA_Bulb	TAIR	AT5G56270.1	| Symbols: WRKY2, ATWRKY2 | WRKY DNA-binding protein 2 | chr5:22780816-22783137 FORWARD LENGTH=687
	IRGSP	Os01t0826400-01	WRKY transcription factor 24 (WRKY24).
	nr	ref|XP_002444812.1|	hypothetical protein SORBIDRAFT_07g028430 [Sorghum bicolor] gi|241941162|gb|EES14307.1| hypothetical protein SORBIDRAFT_07g028430 [Sorghum bicolor]
Unigene34920_DHA_Bulb	TAIR	AT2G34830.1	| Symbols: WRKY35, MEE24, AtWRKY35 | WRKY DNA-binding protein 35 | chr2:14693839-14696378 REVERSE LENGTH=427
	IRGSP	Os02t0265200-01	WRKY transcription factor 39.
	nr	ref|XP_004492798.1|	PREDICTED: WRKY transcription factor 22-like [Cicer arietinum]
Unigene35594_DHA_Bulb	TAIR	AT4G23810.1	| Symbols: WRKY53, ATWRKY53 | WRKY family transcription factor | chr4:12392666-12393739 REVERSE LENGTH=324
	IRGSP	Os01t0656400-00	Similar to WRKY transcription factor 15.
	nr	ref|XP_002267793.2|	PREDICTED: probable WRKY transcription factor 53-like [Vitis vinifera] gi|302143686|emb|CBI22547.3| unnamed protein product [Vitis vinifera]
Unigene3570_DHA_Bulb	TAIR	AT4G11070.2	| Symbols: WRKY41, AtWRKY41 | WRKY family transcription factor | chr4:6759303-6760763 FORWARD LENGTH=281
	IRGSP	Os09t0334500-01	WRKY transcription factor 74.
	nr	ref|XP_004245530.1|	PREDICTED: probable WRKY transcription factor 53-like [Solanum lycopersicum]
Unigene37128_DHA_Bulb	TAIR	AT3G01080.1	| Symbols: WRKY58, ATWRKY58 | WRKY DNA-binding protein 58 | chr3:25507-27449 FORWARD LENGTH=423
	IRGSP	Os04t0471700-00	Similar to WRKY10 (WRKY transcription factor 35).
	nr	ref|XP_002529203.1|	conserved hypothetical protein [Ricinus communis] gi|223531321|gb|EEF33159.1| conserved hypothetical protein [Ricinus communis]
Unigene39840_DHA_Bulb	TAIR	AT4G26640.2	| Symbols: WRKY20, AtWRKY20 | WRKY family transcription factor family protein | chr4:13437298-13440693 REVERSE LENGTH=557
	IRGSP	Os07t0583700-01	WRKY transcription factor 78.
	nr	emb|CAP08301.1|	DNA-binding protein [Vitis thunbergii]
Unigene525_DHA_Bulb	TAIR	--No_Hits--
	IRGSP	--No_Hits--
	nr	ref|XP_003519273.1|	PREDICTED: probable WRKY transcription factor 33 [Glycine max]
Unigene6084_DHA_Bulb	TAIR	AT1G13960.2	| Symbols: WRKY4 | WRKY DNA-binding protein 4 | chr1:4776622-4779043 FORWARD LENGTH=487
	IRGSP	Os01t0826400-01	WRKY transcription factor 24 (WRKY24).
	nr	ref|XP_002445412.1|	hypothetical protein SORBIDRAFT_07g016330 [Sorghum bicolor] gi|241941762|gb|EES14907.1| hypothetical protein SORBIDRAFT_07g016330 [Sorghum bicolor]
Unigene9592_DHA_Bulb	TAIR	AT1G62300.1	| Symbols: WRKY6, ATWRKY6 | WRKY family transcription factor | chr1:23016887-23019155 REVERSE LENGTH=553
	IRGSP	Os01t0246700-01	Similar to WRKY transcription factor 1.
	nr	emb|CAN65218.1|	hypothetical protein VITISV_024690 [Vitis vinifera]
CL1028.Contig1_DHC_Leaf	TAIR	AT2G40750.1	| Symbols: WRKY54, ATWRKY54 | WRKY DNA-binding protein 54 | chr2:17000636-17002354 REVERSE LENGTH=346
	IRGSP	Os03t0335200-01	Similar to WRKY1 (WRKY transcription factor 17).
	nr	gb|EOY04438.1|	WRKY DNA-binding protein 70, putative isoform 1 [Theobroma cacao]
CL1028.Contig2_DHC_Leaf	TAIR	--No_Hits--
	IRGSP	Os03t0335200-01	Similar to WRKY1 (WRKY transcription factor 17).
	nr	ref|XP_003561664.1|	PREDICTED: uncharacterized protein LOC100839062 [Brachypodium distachyon]
CL1028.Contig3_DHC_Leaf	TAIR	AT4G23810.1	| Symbols: WRKY53, ATWRKY53 | WRKY family transcription factor | chr4:12392666-12393739 REVERSE LENGTH=324
	IRGSP	Os05t0478400-00	Similar to WRKY transcription factor 48.
	nr	--No_Hits--
CL1218.Contig1_DHC_Leaf	TAIR	AT2G38470.1	| Symbols: WRKY33, ATWRKY33 | WRKY DNA-binding protein 33 | chr2:16108476-16110539 FORWARD LENGTH=519
	IRGSP	Os05t0343400-01	WRKY transcription factor 53 (Transcription factor WRKY12).
	nr	dbj|BAI63296.1|	double WRKY type transfactor [Nicotiana benthamiana]
CL1218.Contig2_DHC_Leaf	TAIR	AT2G38470.1	| Symbols: WRKY33, ATWRKY33 | WRKY DNA-binding protein 33 | chr2:16108476-16110539 FORWARD LENGTH=519
	IRGSP	Os01t0826400-01	WRKY transcription factor 24 (WRKY24).
	nr	gb|EOY34631.1|	WRKY DNA-binding protein 33 isoform 1 [Theobroma cacao]
CL1218.Contig3_DHC_Leaf	TAIR	AT2G38470.1	| Symbols: WRKY33, ATWRKY33 | WRKY DNA-binding protein 33 | chr2:16108476-16110539 FORWARD LENGTH=519
	IRGSP	Os01t0826400-01	WRKY transcription factor 24 (WRKY24).
	nr	gb|EOY34631.1|	WRKY DNA-binding protein 33 isoform 1 [Theobroma cacao]
CL1218.Contig4_DHC_Leaf	TAIR	AT2G38470.1	| Symbols: WRKY33, ATWRKY33 | WRKY DNA-binding protein 33 | chr2:16108476-16110539 FORWARD LENGTH=519
	IRGSP	Os05t0343400-01	WRKY transcription factor 53 (Transcription factor WRKY12).
	nr	gb|AAS13439.1|	WRKY3 [Nicotiana attenuata]
CL1218.Contig5_DHC_Leaf	TAIR	AT2G38470.1	| Symbols: WRKY33, ATWRKY33 | WRKY DNA-binding protein 33 | chr2:16108476-16110539 FORWARD LENGTH=519
	IRGSP	Os05t0343400-01	WRKY transcription factor 53 (Transcription factor WRKY12).
	nr	gb|AAS13439.1|	WRKY3 [Nicotiana attenuata]
CL1218.Contig6_DHC_Leaf	TAIR	AT2G38470.1	| Symbols: WRKY33, ATWRKY33 | WRKY DNA-binding protein 33 | chr2:16108476-16110539 FORWARD LENGTH=519
	IRGSP	Os01t0826400-01	WRKY transcription factor 24 (WRKY24).
	nr	gb|EOY34631.1|	WRKY DNA-binding protein 33 isoform 1 [Theobroma cacao]
CL1277.Contig2_DHC_Leaf	TAIR	AT1G04640.2	| Symbols: LIP2 | lipoyltransferase 2 | chr1:1292541-1293248 FORWARD LENGTH=235
	IRGSP	Os03t0321800-02	Similar to WRKY transcription factor 55.
	nr	ref|XP_002525976.1|	lipoate-protein ligase B, putative [Ricinus communis] gi|223534708|gb|EEF36400.1| lipoate-protein ligase B, putative [Ricinus communis]
CL1887.Contig1_DHC_Leaf	TAIR	--No_Hits--
	IRGSP	Os12t0116700-01	Similar to WRKY transcription factor 64.
	nr	--No_Hits--
CL3379.Contig1_DHC_Leaf	TAIR	AT5G15130.1	| Symbols: WRKY72, ATWRKY72 | WRKY DNA-binding protein 72 | chr5:4904426-4906879 FORWARD LENGTH=548
	IRGSP	Os01t0185900-01	Similar to WRKY 1 (Fragment).
	nr	ref|NP_001234802.1|	transcription factor WRKY72 [Solanum lycopersicum] gi|300498294|gb|ADK23849.1| WRKY72 [Solanum lycopersicum]
CL3379.Contig2_DHC_Leaf	TAIR	AT5G15130.1	| Symbols: WRKY72, ATWRKY72 | WRKY DNA-binding protein 72 | chr5:4904426-4906879 FORWARD LENGTH=548
	IRGSP	Os01t0185900-01	Similar to WRKY 1 (Fragment).
	nr	ref|NP_001234802.1|	transcription factor WRKY72 [Solanum lycopersicum] gi|300498294|gb|ADK23849.1| WRKY72 [Solanum lycopersicum]
CL3512.Contig1_DHC_Leaf	TAIR	AT2G40750.1	| Symbols: WRKY54, ATWRKY54 | WRKY DNA-binding protein 54 | chr2:17000636-17002354 REVERSE LENGTH=346
	IRGSP	Os12t0116400-00	Similar to WRKY DNA binding domain containing protein, expressed.
	nr	gb|AFW64632.1|	putative WRKY DNA-binding domain superfamily protein [Zea mays]
CL3512.Contig2_DHC_Leaf	TAIR	--No_Hits--
	IRGSP	Os11t0117500-01	DNA-binding WRKY domain containing protein.
	nr	--No_Hits--
CL4046.Contig1_DHC_Leaf	TAIR	AT4G11070.1	| Symbols: WRKY41, AtWRKY41 | WRKY family transcription factor | chr4:6759303-6760763 FORWARD LENGTH=313
	IRGSP	Os09t0334500-01	WRKY transcription factor 74.
	nr	gb|EOY23457.1|	WRKY DNA-binding protein 30, putative [Theobroma cacao]
CL4046.Contig2_DHC_Leaf	TAIR	AT4G11070.2	| Symbols: WRKY41, AtWRKY41 | WRKY family transcription factor | chr4:6759303-6760763 FORWARD LENGTH=281
	IRGSP	Os06t0158100-00	Similar to WRKY transcription factor 63.
	nr	ref|XP_004245530.1|	PREDICTED: probable WRKY transcription factor 53-like [Solanum lycopersicum]
CL4046.Contig3_DHC_Leaf	TAIR	AT4G11070.2	| Symbols: WRKY41, AtWRKY41 | WRKY family transcription factor | chr4:6759303-6760763 FORWARD LENGTH=281
	IRGSP	Os06t0158100-00	Similar to WRKY transcription factor 63.
	nr	ref|XP_004245530.1|	PREDICTED: probable WRKY transcription factor 53-like [Solanum lycopersicum]
CL5816.Contig1_DHC_Leaf	TAIR	AT5G56270.1	| Symbols: WRKY2, ATWRKY2 | WRKY DNA-binding protein 2 | chr5:22780816-22783137 FORWARD LENGTH=687
	IRGSP	Os01t0826400-01	WRKY transcription factor 24 (WRKY24).
	nr	gb|EOA19137.1|	hypothetical protein CARUB_v10007808mg [Capsella rubella]
CL621.Contig1_DHC_Leaf	TAIR	AT2G38470.1	| Symbols: WRKY33, ATWRKY33 | WRKY DNA-binding protein 33 | chr2:16108476-16110539 FORWARD LENGTH=519
	IRGSP	Os05t0343400-01	WRKY transcription factor 53 (Transcription factor WRKY12).
	nr	gb|EMJ06226.1|	hypothetical protein PRUPE_ppa004009mg [Prunus persica]
CL621.Contig2_DHC_Leaf	TAIR	AT2G38470.1	| Symbols: WRKY33, ATWRKY33 | WRKY DNA-binding protein 33 | chr2:16108476-16110539 FORWARD LENGTH=519
	IRGSP	Os01t0826400-01	WRKY transcription factor 24 (WRKY24).
	nr	gb|EMJ06226.1|	hypothetical protein PRUPE_ppa004009mg [Prunus persica]
CL748.Contig1_DHC_Leaf	TAIR	AT1G29280.1	| Symbols: WRKY65, ATWRKY65 | WRKY DNA-binding protein 65 | chr1:10236589-10237467 FORWARD LENGTH=259
	IRGSP	Os01t0730700-01	WRKY transcription factor 14 (WRKY14).
	nr	ref|XP_002269267.1|	PREDICTED: probable WRKY transcription factor 65 [Vitis vinifera] gi|297740534|emb|CBI30716.3| unnamed protein product [Vitis vinifera]
CL748.Contig2_DHC_Leaf	TAIR	AT1G29280.1	| Symbols: WRKY65, ATWRKY65 | WRKY DNA-binding protein 65 | chr1:10236589-10237467 FORWARD LENGTH=259
	IRGSP	Os01t0750100-03	Similar to WRKY13 transcription factor.
	nr	ref|XP_002269267.1|	PREDICTED: probable WRKY transcription factor 65 [Vitis vinifera] gi|297740534|emb|CBI30716.3| unnamed protein product [Vitis vinifera]
Unigene10518_DHC_Leaf	TAIR	AT4G31550.2	| Symbols: WRKY11, ATWRKY11 | WRKY DNA-binding protein 11 | chr4:15290065-15291458 REVERSE LENGTH=324
	IRGSP	Os04t0287400-01	Similar to WRKY transcription factor 51.
	nr	emb|CBI17876.3|	unnamed protein product [Vitis vinifera]
Unigene10568_DHC_Leaf	TAIR	--No_Hits--
	IRGSP	--No_Hits--
	nr	ref|XP_003519273.1|	PREDICTED: probable WRKY transcription factor 33 [Glycine max]
Unigene11321_DHC_Leaf	TAIR	AT1G13960.1	| Symbols: WRKY4 | WRKY DNA-binding protein 4 | chr1:4776622-4779043 FORWARD LENGTH=514
	IRGSP	Os12t0507300-00	Similar to WRKY DNA binding domain containing protein, expressed.
	nr	gb|AAT46067.1|	DNA binding protein WRKY2 [Vitis vinifera]
Unigene11422_DHC_Leaf	TAIR	AT4G30935.1	| Symbols: WRKY32, ATWRKY32 | WRKY DNA-binding protein 32 | chr4:15051916-15053908 REVERSE LENGTH=466
	IRGSP	Os09t0481700-02	SUSIBA2-like (WRKY transcription factor 80).
	nr	ref|XP_003571606.1|	PREDICTED: probable WRKY transcription factor 4-like [Brachypodium distachyon]
Unigene13149_DHC_Leaf	TAIR	AT4G26640.2	| Symbols: WRKY20, AtWRKY20 | WRKY family transcription factor family protein | chr4:13437298-13440693 REVERSE LENGTH=557
	IRGSP	Os07t0583700-01	WRKY transcription factor 78.
	nr	gb|EAZ04490.1|	hypothetical protein OsI_26641 [Oryza sativa Indica Group]
Unigene13150_DHC_Leaf	TAIR	AT4G26640.2	| Symbols: WRKY20, AtWRKY20 | WRKY family transcription factor family protein | chr4:13437298-13440693 REVERSE LENGTH=557
	IRGSP	Os07t0583700-01	WRKY transcription factor 78.
	nr	gb|EAZ04490.1|	hypothetical protein OsI_26641 [Oryza sativa Indica Group]
Unigene15784_DHC_Leaf	TAIR	AT5G52830.1	| Symbols: WRKY27, ATWRKY27 | WRKY DNA-binding protein 27 | chr5:21410996-21412218 FORWARD LENGTH=348
	IRGSP	Os02t0265200-01	WRKY transcription factor 39.
	nr	ref|NP_001237508.1|	transcription factor [Glycine max] gi|166203223|gb|ABY84652.1| transcription factor [Glycine max]
Unigene16811_DHC_Leaf	TAIR	AT5G13080.1	| Symbols: WRKY75, ATWRKY75 | WRKY DNA-binding protein 75 | chr5:4149928-4151019 REVERSE LENGTH=145
	IRGSP	Os11t0490900-01	Similar to WRKY transcription factor 72.
	nr	tpg|DAA41982.1|	TPA: putative WRKY DNA-binding domain superfamily protein [Zea mays]
Unigene1822_DHC_Leaf	TAIR	AT2G34830.1	| Symbols: WRKY35, MEE24, AtWRKY35 | WRKY DNA-binding protein 35 | chr2:14693839-14696378 REVERSE LENGTH=427
	IRGSP	Os04t0597300-01	Similar to WERKY protein (Fragment).
	nr	ref|XP_002270750.2|	PREDICTED: LOW QUALITY PROTEIN: WRKY transcription factor 22 [Vitis vinifera]
Unigene19800_DHC_Leaf	TAIR	AT1G70060.1	| Symbols: SNL4 | SIN3-like 4 | chr1:26383789-26389568 FORWARD LENGTH=1326
	IRGSP	Os01t0109700-01	Similar to Paired amphipathic helix repeat-containing protein / transcription regulator-related.
	nr	gb|EOY00289.1|	WRKY domain class transcription factor [Theobroma cacao]
Unigene22525_DHC_Leaf	TAIR	AT5G49520.1	| Symbols: WRKY48, ATWRKY48 | WRKY DNA-binding protein 48 | chr5:20090890-20092867 FORWARD LENGTH=399
	IRGSP	Os05t0565900-00	DNA-binding WRKY domain containing protein.
	nr	ref|XP_002279385.1|	PREDICTED: probable WRKY transcription factor 48 [Vitis vinifera] gi|296083226|emb|CBI22862.3| unnamed protein product [Vitis vinifera]
Unigene25995_DHC_Leaf	TAIR	AT2G38470.1	| Symbols: WRKY33, ATWRKY33 | WRKY DNA-binding protein 33 | chr2:16108476-16110539 FORWARD LENGTH=519
	IRGSP	Os01t0826400-01	WRKY transcription factor 24 (WRKY24).
	nr	ref|XP_003538323.1|	PREDICTED: probable WRKY transcription factor 4 [Glycine max]
Unigene26662_DHC_Leaf	TAIR	AT5G64810.1	| Symbols: WRKY51, ATWRKY51 | WRKY DNA-binding protein 51 | chr5:25908415-25909687 FORWARD LENGTH=194
	IRGSP	Os05t0537100-00	WRKY transcription factor 10.
	nr	gb|AFW78902.1|	putative WRKY DNA-binding domain superfamily protein [Zea mays]
Unigene27157_DHC_Leaf	TAIR	AT5G56270.1	| Symbols: WRKY2, ATWRKY2 | WRKY DNA-binding protein 2 | chr5:22780816-22783137 FORWARD LENGTH=687
	IRGSP	Os04t0471700-00	Similar to WRKY10 (WRKY transcription factor 35).
	nr	gb|AER70305.1|	WRKY transcription factor [(Populus tomentosa x P. bolleana) x P. tomentosa]
Unigene28103_DHC_Leaf	TAIR	AT1G04640.2	| Symbols: LIP2 | lipoyltransferase 2 | chr1:1292541-1293248 FORWARD LENGTH=235
	IRGSP	Os03t0321800-02	Similar to WRKY transcription factor 55.
	nr	ref|XP_002297668.1|	predicted protein [Populus trichocarpa] gi|222844926|gb|EEE82473.1| predicted protein [Populus trichocarpa]
Unigene28105_DHC_Leaf	TAIR	AT1G04640.2	| Symbols: LIP2 | lipoyltransferase 2 | chr1:1292541-1293248 FORWARD LENGTH=235
	IRGSP	Os03t0321800-02	Similar to WRKY transcription factor 55.
	nr	ref|XP_002525976.1|	lipoate-protein ligase B, putative [Ricinus communis] gi|223534708|gb|EEF36400.1| lipoate-protein ligase B, putative [Ricinus communis]
Unigene29873_DHC_Leaf	TAIR	AT2G40750.1	| Symbols: WRKY54, ATWRKY54 | WRKY DNA-binding protein 54 | chr2:17000636-17002354 REVERSE LENGTH=346
	IRGSP	Os11t0117500-01	DNA-binding WRKY domain containing protein.
	nr	gb|ABA96294.1|	WRKY DNA binding domain containing protein, expressed [Oryza sativa Japonica Group] gi|125578297|gb|EAZ19443.1| hypothetical protein OsJ_35004 [Oryza sativa Japonica Group]
Unigene29874_DHC_Leaf	TAIR	AT1G66550.2	| Symbols: WRKY67, ATWRKY67 | WRKY DNA-binding protein 67 | chr1:24828537-24829589 FORWARD LENGTH=249
	IRGSP	Os01t0820400-00	Similar to WRKY22 - superfamily of TFs having WRKY and zinc finger domains.
	nr	gb|ABA96294.1|	WRKY DNA binding domain containing protein, expressed [Oryza sativa Japonica Group] gi|125578297|gb|EAZ19443.1| hypothetical protein OsJ_35004 [Oryza sativa Japonica Group]
Unigene30770_DHC_Leaf	TAIR	AT3G56400.1	| Symbols: WRKY70, ATWRKY70 | WRKY DNA-binding protein 70 | chr3:20909082-20910409 REVERSE LENGTH=294
	IRGSP	Os05t0322900-01	Similar to WRKY transcription factor 45.
	nr	ref|XP_003566383.1|	PREDICTED: uncharacterized protein LOC100836752 [Brachypodium distachyon]
Unigene31517_DHC_Leaf	TAIR	AT1G80840.1	| Symbols: WRKY40, ATWRKY40 | WRKY DNA-binding protein 40 | chr1:30383834-30385356 FORWARD LENGTH=302
	IRGSP	Os06t0649000-02	Similar to WRKY transcription factor 28.
	nr	gb|ADU02585.1|	WRKY transcription factor 4 [Vitis vinifera]
Unigene31568_DHC_Leaf	TAIR	AT3G04670.1	| Symbols: WRKY39, ATWRKY39 | WRKY DNA-binding protein 39 | chr3:1266530-1267691 REVERSE LENGTH=330
	IRGSP	Os12t0597700-01	Similar to WRKY2 (Fragment).
	nr	emb|CBI35175.3|	unnamed protein product [Vitis vinifera]
Unigene32020_DHC_Leaf	TAIR	AT5G24110.1	| Symbols: WRKY30, ATWRKY30 | WRKY DNA-binding protein 30 | chr5:8153416-8154633 REVERSE LENGTH=303
	IRGSP	Os01t0656400-00	Similar to WRKY transcription factor 15.
	nr	gb|EOY23457.1|	WRKY DNA-binding protein 30, putative [Theobroma cacao]
Unigene32675_DHC_Leaf	TAIR	AT1G28280.2	| Symbols: | VQ motif-containing protein | chr1:9886297-9887395 REVERSE LENGTH=243
	IRGSP	Os01t0201250-00	Similar to DNA-binding WRKY.
	nr	ref|XP_002285047.1|	PREDICTED: uncharacterized protein LOC100262369 [Vitis vinifera]
Unigene32758_DHC_Leaf	TAIR	AT3G01080.1	| Symbols: WRKY58, ATWRKY58 | WRKY DNA-binding protein 58 | chr3:25507-27449 FORWARD LENGTH=423
	IRGSP	Os08t0276200-01	Similar to WRKY transcription factor 44 (WRKY DNA-binding protein 44) (TRANSPARENT TESTA GLABRA 2).
	nr	dbj|BAC99487.1|	putative DNA-binding protein WRKY2 [Oryza sativa Japonica Group]
Unigene33164_DHC_Leaf	TAIR	AT5G56270.1	| Symbols: WRKY2, ATWRKY2 | WRKY DNA-binding protein 2 | chr5:22780816-22783137 FORWARD LENGTH=687
	IRGSP	Os09t0481700-02	SUSIBA2-like (WRKY transcription factor 80).
	nr	gb|AGJ52156.1|	WRKY transcription factor 11 [Jatropha curcas]
Unigene35751_DHC_Leaf	TAIR	AT1G29280.1	| Symbols: WRKY65, ATWRKY65 | WRKY DNA-binding protein 65 | chr1:10236589-10237467 FORWARD LENGTH=259
	IRGSP	Os02t0265200-01	WRKY transcription factor 39.
	nr	ref|XP_004492798.1|	PREDICTED: WRKY transcription factor 22-like [Cicer arietinum]
Unigene38548_DHC_Leaf	TAIR	AT1G70060.1	| Symbols: SNL4 | SIN3-like 4 | chr1:26383789-26389568 FORWARD LENGTH=1326
	IRGSP	Os01t0109700-01	Similar to Paired amphipathic helix repeat-containing protein / transcription regulator-related.
	nr	gb|EOY00289.1|	WRKY domain class transcription factor [Theobroma cacao]
Unigene38985_DHC_Leaf	TAIR	AT2G34830.1	| Symbols: WRKY35, MEE24, AtWRKY35 | WRKY DNA-binding protein 35 | chr2:14693839-14696378 REVERSE LENGTH=427
	IRGSP	Os02t0698800-01	WRKY transcription factor 66.
	nr	gb|EOY25617.1|	WRKY DNA-binding protein 14, putative [Theobroma cacao]
Unigene4182_DHC_Leaf	TAIR	AT3G56400.1	| Symbols: WRKY70, ATWRKY70 | WRKY DNA-binding protein 70 | chr3:20909082-20910409 REVERSE LENGTH=294
	IRGSP	Os11t0116900-01	Similar to WRKY DNA binding domain containing protein, expressed.
	nr	ref|NP_001065590.1|	Os11g0116900 [Oryza sativa Japonica Group] gi|113644294|dbj|BAF27435.1| Os11g0116900, partial [Oryza sativa Japonica Group]
Unigene491_DHC_Leaf	TAIR	AT5G56270.1	| Symbols: WRKY2, ATWRKY2 | WRKY DNA-binding protein 2 | chr5:22780816-22783137 FORWARD LENGTH=687
	IRGSP	Os09t0481700-02	SUSIBA2-like (WRKY transcription factor 80).
	nr	gb|ADL36865.1|	WRKY domain class transcription factor [Malus x domestica]
Unigene552_DHC_Leaf	TAIR	AT2G38470.1	| Symbols: WRKY33, ATWRKY33 | WRKY DNA-binding protein 33 | chr2:16108476-16110539 FORWARD LENGTH=519
	IRGSP	Os01t0826400-01	WRKY transcription factor 24 (WRKY24).
	nr	dbj|BAI63296.1|	double WRKY type transfactor [Nicotiana benthamiana]
Unigene712_DHC_Leaf	TAIR	AT2G38470.1	| Symbols: WRKY33, ATWRKY33 | WRKY DNA-binding protein 33 | chr2:16108476-16110539 FORWARD LENGTH=519
	IRGSP	Os01t0826400-01	WRKY transcription factor 24 (WRKY24).
	nr	gb|AGJ52154.1|	WRKY transcription factor 08 [Jatropha curcas]
Unigene9613_DHC_Leaf	TAIR	AT1G62300.1	| Symbols: WRKY6, ATWRKY6 | WRKY family transcription factor | chr1:23016887-23019155 REVERSE LENGTH=553
	IRGSP	Os05t0137500-00	Similar to WRKY transcription factor 5.
	nr	ref|XP_002518444.1|	WRKY transcription factor, putative [Ricinus communis] gi|223542289|gb|EEF43831.1| WRKY transcription factor, putative [Ricinus communis]
CL134.Contig1_DHA_Leaf	TAIR	AT2G38470.1	| Symbols: WRKY33, ATWRKY33 | WRKY DNA-binding protein 33 | chr2:16108476-16110539 FORWARD LENGTH=519
	IRGSP	Os01t0826400-01	WRKY transcription factor 24 (WRKY24).
	nr	gb|EOY34631.1|	WRKY DNA-binding protein 33 isoform 1 [Theobroma cacao]
CL134.Contig2_DHA_Leaf	TAIR	AT2G38470.1	| Symbols: WRKY33, ATWRKY33 | WRKY DNA-binding protein 33 | chr2:16108476-16110539 FORWARD LENGTH=519
	IRGSP	Os01t0826400-01	WRKY transcription factor 24 (WRKY24).
	nr	gb|EOY34631.1|	WRKY DNA-binding protein 33 isoform 1 [Theobroma cacao]
CL134.Contig3_DHA_Leaf	TAIR	AT2G38470.1	| Symbols: WRKY33, ATWRKY33 | WRKY DNA-binding protein 33 | chr2:16108476-16110539 FORWARD LENGTH=519
	IRGSP	Os05t0343400-01	WRKY transcription factor 53 (Transcription factor WRKY12).
	nr	gb|AAS13439.1|	WRKY3 [Nicotiana attenuata]
CL134.Contig4_DHA_Leaf	TAIR	AT2G38470.1	| Symbols: WRKY33, ATWRKY33 | WRKY DNA-binding protein 33 | chr2:16108476-16110539 FORWARD LENGTH=519
	IRGSP	Os05t0343400-01	WRKY transcription factor 53 (Transcription factor WRKY12).
	nr	gb|AAS13439.1|	WRKY3 [Nicotiana attenuata]
CL2024.Contig1_DHA_Leaf	TAIR	AT5G56270.1	| Symbols: WRKY2, ATWRKY2 | WRKY DNA-binding protein 2 | chr5:22780816-22783137 FORWARD LENGTH=687
	IRGSP	Os04t0471700-00	Similar to WRKY10 (WRKY transcription factor 35).
	nr	gb|ADL36865.1|	WRKY domain class transcription factor [Malus x domestica]
CL2200.Contig1_DHA_Leaf	TAIR	AT3G56400.1	| Symbols: WRKY70, ATWRKY70 | WRKY DNA-binding protein 70 | chr3:20909082-20910409 REVERSE LENGTH=294
	IRGSP	Os05t0478400-00	Similar to WRKY transcription factor 48.
	nr	ref|XP_004305075.1|	PREDICTED: probable WRKY transcription factor 70-like [Fragaria vesca subsp. vesca]
CL3665.Contig1_DHA_Leaf	TAIR	AT1G29280.1	| Symbols: WRKY65, ATWRKY65 | WRKY DNA-binding protein 65 | chr1:10236589-10237467 FORWARD LENGTH=259
	IRGSP	Os01t0730700-01	WRKY transcription factor 14 (WRKY14).
	nr	ref|XP_002269267.1|	PREDICTED: probable WRKY transcription factor 65 [Vitis vinifera] gi|297740534|emb|CBI30716.3| unnamed protein product [Vitis vinifera]
CL3665.Contig2_DHA_Leaf	TAIR	AT1G29280.1	| Symbols: WRKY65, ATWRKY65 | WRKY DNA-binding protein 65 | chr1:10236589-10237467 FORWARD LENGTH=259
	IRGSP	Os01t0750100-03	Similar to WRKY13 transcription factor.
	nr	ref|XP_002269267.1|	PREDICTED: probable WRKY transcription factor 65 [Vitis vinifera] gi|297740534|emb|CBI30716.3| unnamed protein product [Vitis vinifera]
CL4232.Contig1_DHA_Leaf	TAIR	AT5G24110.1	| Symbols: WRKY30, ATWRKY30 | WRKY DNA-binding protein 30 | chr5:8153416-8154633 REVERSE LENGTH=303
	IRGSP	Os01t0656400-00	Similar to WRKY transcription factor 15.
	nr	gb|EOY23457.1|	WRKY DNA-binding protein 30, putative [Theobroma cacao]
CL4232.Contig2_DHA_Leaf	TAIR	AT5G24110.1	| Symbols: WRKY30, ATWRKY30 | WRKY DNA-binding protein 30 | chr5:8153416-8154633 REVERSE LENGTH=303
	IRGSP	Os01t0656400-00	Similar to WRKY transcription factor 15.
	nr	gb|EOY23457.1|	WRKY DNA-binding protein 30, putative [Theobroma cacao]
CL4236.Contig1_DHA_Leaf	TAIR	AT5G64810.1	| Symbols: WRKY51, ATWRKY51 | WRKY DNA-binding protein 51 | chr5:25908415-25909687 FORWARD LENGTH=194
	IRGSP	Os05t0537100-00	WRKY transcription factor 10.
	nr	ref|XP_002440147.1|	hypothetical protein SORBIDRAFT_09g026830 [Sorghum bicolor] gi|241945432|gb|EES18577.1| hypothetical protein SORBIDRAFT_09g026830 [Sorghum bicolor]
CL4236.Contig2_DHA_Leaf	TAIR	AT5G26170.1	| Symbols: WRKY50, ATWRKY50 | WRKY DNA-binding protein 50 | chr5:9147176-9148128 REVERSE LENGTH=173
	IRGSP	Os05t0183100-01	Similar to WRKY transcription factor 16 (Fragment).
	nr	ref|XP_002307134.1|	predicted protein [Populus trichocarpa] gi|222856583|gb|EEE94130.1| predicted protein [Populus trichocarpa]
CL566.Contig1_DHA_Leaf	TAIR	AT1G66550.2	| Symbols: WRKY67, ATWRKY67 | WRKY DNA-binding protein 67 | chr1:24828537-24829589 FORWARD LENGTH=249
	IRGSP	Os11t0117500-01	DNA-binding WRKY domain containing protein.
	nr	gb|ABA96294.1|	WRKY DNA binding domain containing protein, expressed [Oryza sativa Japonica Group] gi|125578297|gb|EAZ19443.1| hypothetical protein OsJ_35004 [Oryza sativa Japonica Group]
CL566.Contig2_DHA_Leaf	TAIR	--No_Hits--
	IRGSP	Os11t0117500-01	DNA-binding WRKY domain containing protein.
	nr	--No_Hits--
CL6413.Contig1_DHA_Leaf	TAIR	AT2G38470.1	| Symbols: WRKY33, ATWRKY33 | WRKY DNA-binding protein 33 | chr2:16108476-16110539 FORWARD LENGTH=519
	IRGSP	Os05t0343400-01	WRKY transcription factor 53 (Transcription factor WRKY12).
	nr	gb|EMJ09489.1|	hypothetical protein PRUPE_ppa003333mg [Prunus persica]
CL652.Contig1_DHA_Leaf	TAIR	AT4G26640.2	| Symbols: WRKY20, AtWRKY20 | WRKY family transcription factor family protein | chr4:13437298-13440693 REVERSE LENGTH=557
	IRGSP	Os07t0583700-01	WRKY transcription factor 78.
	nr	gb|EAZ04490.1|	hypothetical protein OsI_26641 [Oryza sativa Indica Group]
CL652.Contig2_DHA_Leaf	TAIR	AT4G26640.2	| Symbols: WRKY20, AtWRKY20 | WRKY family transcription factor family protein | chr4:13437298-13440693 REVERSE LENGTH=557
	IRGSP	Os07t0583700-01	WRKY transcription factor 78.
	nr	gb|EAZ04490.1|	hypothetical protein OsI_26641 [Oryza sativa Indica Group]
CL6710.Contig1_DHA_Leaf	TAIR	AT2G38470.1	| Symbols: WRKY33, ATWRKY33 | WRKY DNA-binding protein 33 | chr2:16108476-16110539 FORWARD LENGTH=519
	IRGSP	Os05t0343400-01	WRKY transcription factor 53 (Transcription factor WRKY12).
	nr	dbj|BAI63296.1|	double WRKY type transfactor [Nicotiana benthamiana]
CL7008.Contig1_DHA_Leaf	TAIR	AT2G38470.1	| Symbols: WRKY33, ATWRKY33 | WRKY DNA-binding protein 33 | chr2:16108476-16110539 FORWARD LENGTH=519
	IRGSP	Os01t0826400-01	WRKY transcription factor 24 (WRKY24).
	nr	gb|AGJ52154.1|	WRKY transcription factor 08 [Jatropha curcas]
CL7008.Contig2_DHA_Leaf	TAIR	AT2G38470.1	| Symbols: WRKY33, ATWRKY33 | WRKY DNA-binding protein 33 | chr2:16108476-16110539 FORWARD LENGTH=519
	IRGSP	Os01t0826400-01	WRKY transcription factor 24 (WRKY24).
	nr	gb|AGJ52154.1|	WRKY transcription factor 08 [Jatropha curcas]
CL7008.Contig3_DHA_Leaf	TAIR	AT2G38470.1	| Symbols: WRKY33, ATWRKY33 | WRKY DNA-binding protein 33 | chr2:16108476-16110539 FORWARD LENGTH=519
	IRGSP	Os05t0343400-01	WRKY transcription factor 53 (Transcription factor WRKY12).
	nr	gb|EMJ06226.1|	hypothetical protein PRUPE_ppa004009mg [Prunus persica]
CL7008.Contig4_DHA_Leaf	TAIR	AT2G38470.1	| Symbols: WRKY33, ATWRKY33 | WRKY DNA-binding protein 33 | chr2:16108476-16110539 FORWARD LENGTH=519
	IRGSP	Os05t0343400-01	WRKY transcription factor 53 (Transcription factor WRKY12).
	nr	gb|EMJ06226.1|	hypothetical protein PRUPE_ppa004009mg [Prunus persica]
CL7068.Contig1_DHA_Leaf	TAIR	AT3G04670.1	| Symbols: WRKY39, ATWRKY39 | WRKY DNA-binding protein 39 | chr3:1266530-1267691 REVERSE LENGTH=330
	IRGSP	Os12t0597700-01	Similar to WRKY2 (Fragment).
	nr	ref|XP_002520995.1|	WRKY transcription factor, putative [Ricinus communis] gi|223539832|gb|EEF41412.1| WRKY transcription factor, putative [Ricinus communis]
CL7068.Contig2_DHA_Leaf	TAIR	AT5G28650.1	| Symbols: WRKY74, ATWRKY74 | WRKY DNA-binding protein 74 | chr5:10677790-10678945 REVERSE LENGTH=330
	IRGSP	Os12t0597700-02	Similar to WRKY DNA binding domain containing protein, expressed.
	nr	ref|XP_003562250.1|	PREDICTED: probable WRKY transcription factor 74-like [Brachypodium distachyon]
Unigene25580_DHA_Leaf	TAIR	AT2G38470.1	| Symbols: WRKY33, ATWRKY33 | WRKY DNA-binding protein 33 | chr2:16108476-16110539 FORWARD LENGTH=519
	IRGSP	Os01t0826400-01	WRKY transcription factor 24 (WRKY24).
	nr	dbj|BAA06278.1|	SPF1 protein [Ipomoea batatas]
Unigene25664_DHA_Leaf	TAIR	AT1G13960.1	| Symbols: WRKY4 | WRKY DNA-binding protein 4 | chr1:4776622-4779043 FORWARD LENGTH=514
	IRGSP	Os12t0507300-00	Similar to WRKY DNA binding domain containing protein, expressed.
	nr	gb|AAT46067.1|	DNA binding protein WRKY2 [Vitis vinifera]
Unigene25665_DHA_Leaf	TAIR	AT2G03340.1	| Symbols: WRKY3 | WRKY DNA-binding protein 3 | chr2:1014724-1016936 REVERSE LENGTH=513
	IRGSP	Os12t0507300-00	Similar to WRKY DNA binding domain containing protein, expressed.
	nr	gb|ADL36852.1|	WRKY domain class transcription factor [Malus x domestica]
Unigene26733_DHA_Leaf	TAIR	AT3G56400.1	| Symbols: WRKY70, ATWRKY70 | WRKY DNA-binding protein 70 | chr3:20909082-20910409 REVERSE LENGTH=294
	IRGSP	Os11t0116900-01	Similar to WRKY DNA binding domain containing protein, expressed.
	nr	ref|NP_001065590.1|	Os11g0116900 [Oryza sativa Japonica Group] gi|113644294|dbj|BAF27435.1| Os11g0116900, partial [Oryza sativa Japonica Group]
Unigene26734_DHA_Leaf	TAIR	--No_Hits--
	IRGSP	Os11t0116900-01	Similar to WRKY DNA binding domain containing protein, expressed.
	nr	--No_Hits--
Unigene28180_DHA_Leaf	TAIR	AT2G38470.1	| Symbols: WRKY33, ATWRKY33 | WRKY DNA-binding protein 33 | chr2:16108476-16110539 FORWARD LENGTH=519
	IRGSP	Os05t0343400-01	WRKY transcription factor 53 (Transcription factor WRKY12).
	nr	dbj|BAJ33769.1|	unnamed protein product [Thellungiella halophila]
Unigene30346_DHA_Leaf	TAIR	AT1G80840.1	| Symbols: WRKY40, ATWRKY40 | WRKY DNA-binding protein 40 | chr1:30383834-30385356 FORWARD LENGTH=302
	IRGSP	Os06t0649000-02	Similar to WRKY transcription factor 28.
	nr	gb|ADU02585.1|	WRKY transcription factor 4 [Vitis vinifera]
Unigene30512_DHA_Leaf	TAIR	AT4G31550.2	| Symbols: WRKY11, ATWRKY11 | WRKY DNA-binding protein 11 | chr4:15290065-15291458 REVERSE LENGTH=324
	IRGSP	Os04t0287400-01	Similar to WRKY transcription factor 51.
	nr	emb|CBI17876.3|	unnamed protein product [Vitis vinifera]
Unigene30583_DHA_Leaf	TAIR	--No_Hits--
	IRGSP	--No_Hits--
	nr	ref|XP_003519273.1|	PREDICTED: probable WRKY transcription factor 33 [Glycine max]
Unigene31405_DHA_Leaf	TAIR	AT5G49520.1	| Symbols: WRKY48, ATWRKY48 | WRKY DNA-binding protein 48 | chr5:20090890-20092867 FORWARD LENGTH=399
	IRGSP	Os05t0565900-00	DNA-binding WRKY domain containing protein.
	nr	ref|XP_004151189.1|	PREDICTED: probable WRKY transcription factor 48-like [Cucumis sativus] gi|449524182|ref|XP_004169102.1| PREDICTED: probable WRKY transcription factor 48-like [Cucumis sativus]
Unigene31436_DHA_Leaf	TAIR	AT1G62300.1	| Symbols: WRKY6, ATWRKY6 | WRKY family transcription factor | chr1:23016887-23019155 REVERSE LENGTH=553
	IRGSP	Os05t0137500-00	Similar to WRKY transcription factor 5.
	nr	ref|XP_002518444.1|	WRKY transcription factor, putative [Ricinus communis] gi|223542289|gb|EEF43831.1| WRKY transcription factor, putative [Ricinus communis]
Unigene31751_DHA_Leaf	TAIR	AT1G04640.2	| Symbols: LIP2 | lipoyltransferase 2 | chr1:1292541-1293248 FORWARD LENGTH=235
	IRGSP	Os03t0321800-02	Similar to WRKY transcription factor 55.
	nr	ref|XP_002525976.1|	lipoate-protein ligase B, putative [Ricinus communis] gi|223534708|gb|EEF36400.1| lipoate-protein ligase B, putative [Ricinus communis]
Unigene31964_DHA_Leaf	TAIR	AT5G13080.1	| Symbols: WRKY75, ATWRKY75 | WRKY DNA-binding protein 75 | chr5:4149928-4151019 REVERSE LENGTH=145
	IRGSP	Os11t0490900-01	Similar to WRKY transcription factor 72.
	nr	tpg|DAA41982.1|	TPA: putative WRKY DNA-binding domain superfamily protein [Zea mays]
Unigene32133_DHA_Leaf	TAIR	AT1G04640.2	| Symbols: LIP2 | lipoyltransferase 2 | chr1:1292541-1293248 FORWARD LENGTH=235
	IRGSP	Os03t0321800-02	Similar to WRKY transcription factor 55.
	nr	ref|XP_002297668.1|	predicted protein [Populus trichocarpa] gi|222844926|gb|EEE82473.1| predicted protein [Populus trichocarpa]
Unigene32828_DHA_Leaf	TAIR	AT5G56270.1	| Symbols: WRKY2, ATWRKY2 | WRKY DNA-binding protein 2 | chr5:22780816-22783137 FORWARD LENGTH=687
	IRGSP	Os01t0826400-01	WRKY transcription factor 24 (WRKY24).
	nr	gb|EOA19137.1|	hypothetical protein CARUB_v10007808mg [Capsella rubella]
Unigene34594_DHA_Leaf	TAIR	AT2G34830.1	| Symbols: WRKY35, MEE24, AtWRKY35 | WRKY DNA-binding protein 35 | chr2:14693839-14696378 REVERSE LENGTH=427
	IRGSP	Os04t0597300-01	Similar to WERKY protein (Fragment).
	nr	emb|CBI31090.3|	unnamed protein product [Vitis vinifera]
Unigene37539_DHA_Leaf	TAIR	AT2G34830.1	| Symbols: WRKY35, MEE24, AtWRKY35 | WRKY DNA-binding protein 35 | chr2:14693839-14696378 REVERSE LENGTH=427
	IRGSP	Os02t0265200-01	WRKY transcription factor 39.
	nr	ref|XP_004492798.1|	PREDICTED: WRKY transcription factor 22-like [Cicer arietinum]
Unigene5665_DHA_Leaf	TAIR	AT4G01250.1	| Symbols: WRKY22, AtWRKY22 | WRKY family transcription factor | chr4:522839-524129 REVERSE LENGTH=298
	IRGSP	Os02t0265200-01	WRKY transcription factor 39.
	nr	ref|XP_004492798.1|	PREDICTED: WRKY transcription factor 22-like [Cicer arietinum]
Unigene5734_DHA_Leaf	TAIR	AT1G13960.2	| Symbols: WRKY4 | WRKY DNA-binding protein 4 | chr1:4776622-4779043 FORWARD LENGTH=487
	IRGSP	Os12t0507300-00	Similar to WRKY DNA binding domain containing protein, expressed.
	nr	ref|XP_003571606.1|	PREDICTED: probable WRKY transcription factor 4-like [Brachypodium distachyon]
Unigene6334_DHA_Leaf	TAIR	AT3G56400.1	| Symbols: WRKY70, ATWRKY70 | WRKY DNA-binding protein 70 | chr3:20909082-20910409 REVERSE LENGTH=294
	IRGSP	Os05t0322900-01	Similar to WRKY transcription factor 45.
	nr	ref|XP_003566383.1|	PREDICTED: uncharacterized protein LOC100836752 [Brachypodium distachyon]
Unigene6601_DHA_Leaf	TAIR	AT1G80840.1	| Symbols: WRKY40, ATWRKY40 | WRKY DNA-binding protein 40 | chr1:30383834-30385356 FORWARD LENGTH=302
	IRGSP	Os06t0649000-02	Similar to WRKY transcription factor 28.
	nr	gb|EOY26053.1|	WRKY DNA-binding protein 40, putative isoform 2 [Theobroma cacao]
Unigene7101_DHA_Leaf	TAIR	AT5G56270.1	| Symbols: WRKY2, ATWRKY2 | WRKY DNA-binding protein 2 | chr5:22780816-22783137 FORWARD LENGTH=687
	IRGSP	Os09t0481700-02	SUSIBA2-like (WRKY transcription factor 80).
	nr	ref|XP_002529203.1|	conserved hypothetical protein [Ricinus communis] gi|223531321|gb|EEF33159.1| conserved hypothetical protein [Ricinus communis]
Unigene8849_DHA_Leaf	TAIR	AT2G34830.1	| Symbols: WRKY35, MEE24, AtWRKY35 | WRKY DNA-binding protein 35 | chr2:14693839-14696378 REVERSE LENGTH=427
	IRGSP	Os04t0597300-01	Similar to WERKY protein (Fragment).
	nr	ref|XP_002270750.2|	PREDICTED: LOW QUALITY PROTEIN: WRKY transcription factor 22 [Vitis vinifera]
Unigene9802_DHA_Leaf	TAIR	AT4G11070.2	| Symbols: WRKY41, AtWRKY41 | WRKY family transcription factor | chr4:6759303-6760763 FORWARD LENGTH=281
	IRGSP	Os09t0334500-01	WRKY transcription factor 74.
	nr	gb|EOY23457.1|	WRKY DNA-binding protein 30, putative [Theobroma cacao]
CL1283.Contig2_F1_Leaf	TAIR	AT2G38470.1	| Symbols: WRKY33, ATWRKY33 | WRKY DNA-binding protein 33 | chr2:16108476-16110539 FORWARD LENGTH=519
	IRGSP	Os05t0343400-01	WRKY transcription factor 53 (Transcription factor WRKY12).
	nr	gb|EMJ09489.1|	hypothetical protein PRUPE_ppa003333mg [Prunus persica]
CL2127.Contig1_F1_Leaf	TAIR	AT2G38470.1	| Symbols: WRKY33, ATWRKY33 | WRKY DNA-binding protein 33 | chr2:16108476-16110539 FORWARD LENGTH=519
	IRGSP	Os01t0826400-01	WRKY transcription factor 24 (WRKY24).
	nr	gb|EOY34631.1|	WRKY DNA-binding protein 33 isoform 1 [Theobroma cacao]
CL2127.Contig2_F1_Leaf	TAIR	AT2G38470.1	| Symbols: WRKY33, ATWRKY33 | WRKY DNA-binding protein 33 | chr2:16108476-16110539 FORWARD LENGTH=519
	IRGSP	Os01t0826400-01	WRKY transcription factor 24 (WRKY24).
	nr	gb|EOY34631.1|	WRKY DNA-binding protein 33 isoform 1 [Theobroma cacao]
CL2127.Contig3_F1_Leaf	TAIR	AT2G38470.1	| Symbols: WRKY33, ATWRKY33 | WRKY DNA-binding protein 33 | chr2:16108476-16110539 FORWARD LENGTH=519
	IRGSP	Os05t0343400-01	WRKY transcription factor 53 (Transcription factor WRKY12).
	nr	gb|AAS13439.1|	WRKY3 [Nicotiana attenuata]
CL2127.Contig4_F1_Leaf	TAIR	AT2G38470.1	| Symbols: WRKY33, ATWRKY33 | WRKY DNA-binding protein 33 | chr2:16108476-16110539 FORWARD LENGTH=519
	IRGSP	Os05t0343400-01	WRKY transcription factor 53 (Transcription factor WRKY12).
	nr	gb|AAS13439.1|	WRKY3 [Nicotiana attenuata]
CL2730.Contig1_F1_Leaf	TAIR	AT2G38470.1	| Symbols: WRKY33, ATWRKY33 | WRKY DNA-binding protein 33 | chr2:16108476-16110539 FORWARD LENGTH=519
	IRGSP	Os05t0343400-01	WRKY transcription factor 53 (Transcription factor WRKY12).
	nr	dbj|BAI63296.1|	double WRKY type transfactor [Nicotiana benthamiana]
CL2730.Contig2_F1_Leaf	TAIR	--No_Hits--
	IRGSP	Os05t0343400-01	WRKY transcription factor 53 (Transcription factor WRKY12).
	nr	dbj|BAA06278.1|	SPF1 protein [Ipomoea batatas]
CL2737.Contig2_F1_Leaf	TAIR	AT3G56400.1	| Symbols: WRKY70, ATWRKY70 | WRKY DNA-binding protein 70 | chr3:20909082-20910409 REVERSE LENGTH=294
	IRGSP	Os05t0478400-00	Similar to WRKY transcription factor 48.
	nr	gb|EOY04438.1|	WRKY DNA-binding protein 70, putative isoform 1 [Theobroma cacao]
CL2940.Contig1_F1_Leaf	TAIR	AT1G80840.1	| Symbols: WRKY40, ATWRKY40 | WRKY DNA-binding protein 40 | chr1:30383834-30385356 FORWARD LENGTH=302
	IRGSP	Os09t0417600-02	WRKY transcription factor 76.
	nr	gb|EOY26053.1|	WRKY DNA-binding protein 40, putative isoform 2 [Theobroma cacao]
CL2940.Contig2_F1_Leaf	TAIR	AT1G80840.1	| Symbols: WRKY40, ATWRKY40 | WRKY DNA-binding protein 40 | chr1:30383834-30385356 FORWARD LENGTH=302
	IRGSP	Os09t0417600-02	WRKY transcription factor 76.
	nr	gb|EOY26053.1|	WRKY DNA-binding protein 40, putative isoform 2 [Theobroma cacao]
CL3542.Contig1_F1_Leaf	TAIR	AT1G29280.1	| Symbols: WRKY65, ATWRKY65 | WRKY DNA-binding protein 65 | chr1:10236589-10237467 FORWARD LENGTH=259
	IRGSP	Os01t0730700-01	WRKY transcription factor 14 (WRKY14).
	nr	ref|XP_002269267.1|	PREDICTED: probable WRKY transcription factor 65 [Vitis vinifera] gi|297740534|emb|CBI30716.3| unnamed protein product [Vitis vinifera]
CL3542.Contig2_F1_Leaf	TAIR	AT1G29280.1	| Symbols: WRKY65, ATWRKY65 | WRKY DNA-binding protein 65 | chr1:10236589-10237467 FORWARD LENGTH=259
	IRGSP	Os01t0750100-03	Similar to WRKY13 transcription factor.
	nr	ref|XP_002269267.1|	PREDICTED: probable WRKY transcription factor 65 [Vitis vinifera] gi|297740534|emb|CBI30716.3| unnamed protein product [Vitis vinifera]
CL3542.Contig3_F1_Leaf	TAIR	AT1G29280.1	| Symbols: WRKY65, ATWRKY65 | WRKY DNA-binding protein 65 | chr1:10236589-10237467 FORWARD LENGTH=259
	IRGSP	Os01t0750100-03	Similar to WRKY13 transcription factor.
	nr	ref|XP_002269267.1|	PREDICTED: probable WRKY transcription factor 65 [Vitis vinifera] gi|297740534|emb|CBI30716.3| unnamed protein product [Vitis vinifera]
CL3542.Contig4_F1_Leaf	TAIR	AT1G29280.1	| Symbols: WRKY65, ATWRKY65 | WRKY DNA-binding protein 65 | chr1:10236589-10237467 FORWARD LENGTH=259
	IRGSP	Os01t0750100-03	Similar to WRKY13 transcription factor.
	nr	ref|XP_002269267.1|	PREDICTED: probable WRKY transcription factor 65 [Vitis vinifera] gi|297740534|emb|CBI30716.3| unnamed protein product [Vitis vinifera]
CL3736.Contig1_F1_Leaf	TAIR	AT5G56270.1	| Symbols: WRKY2, ATWRKY2 | WRKY DNA-binding protein 2 | chr5:22780816-22783137 FORWARD LENGTH=687
	IRGSP	Os08t0499300-01	WRKY transcription factor 30.
	nr	gb|ACQ76801.1|	WRKY transcription factor 2 [Brassica napus]
CL3736.Contig2_F1_Leaf	TAIR	AT5G56270.1	| Symbols: WRKY2, ATWRKY2 | WRKY DNA-binding protein 2 | chr5:22780816-22783137 FORWARD LENGTH=687
	IRGSP	Os09t0481700-02	SUSIBA2-like (WRKY transcription factor 80).
	nr	gb|AGJ52156.1|	WRKY transcription factor 11 [Jatropha curcas]
CL4568.Contig1_F1_Leaf	TAIR	AT4G11070.2	| Symbols: WRKY41, AtWRKY41 | WRKY family transcription factor | chr4:6759303-6760763 FORWARD LENGTH=281
	IRGSP	Os09t0334500-01	WRKY transcription factor 74.
	nr	gb|EOY23457.1|	WRKY DNA-binding protein 30, putative [Theobroma cacao]
CL4568.Contig2_F1_Leaf	TAIR	AT4G11070.2	| Symbols: WRKY41, AtWRKY41 | WRKY family transcription factor | chr4:6759303-6760763 FORWARD LENGTH=281
	IRGSP	Os06t0158100-00	Similar to WRKY transcription factor 63.
	nr	ref|XP_004245530.1|	PREDICTED: probable WRKY transcription factor 53-like [Solanum lycopersicum]
CL5653.Contig1_F1_Leaf	TAIR	AT3G56400.1	| Symbols: WRKY70, ATWRKY70 | WRKY DNA-binding protein 70 | chr3:20909082-20910409 REVERSE LENGTH=294
	IRGSP	Os11t0116900-01	Similar to WRKY DNA binding domain containing protein, expressed.
	nr	ref|NP_001065590.1|	Os11g0116900 [Oryza sativa Japonica Group] gi|113644294|dbj|BAF27435.1| Os11g0116900, partial [Oryza sativa Japonica Group]
CL578.Contig1_F1_Leaf	TAIR	AT1G66550.2	| Symbols: WRKY67, ATWRKY67 | WRKY DNA-binding protein 67 | chr1:24828537-24829589 FORWARD LENGTH=249
	IRGSP	Os11t0117500-01	DNA-binding WRKY domain containing protein.
	nr	gb|ABA96294.1|	WRKY DNA binding domain containing protein, expressed [Oryza sativa Japonica Group] gi|125578297|gb|EAZ19443.1| hypothetical protein OsJ_35004 [Oryza sativa Japonica Group]
CL578.Contig2_F1_Leaf	TAIR	AT1G66550.2	| Symbols: WRKY67, ATWRKY67 | WRKY DNA-binding protein 67 | chr1:24828537-24829589 FORWARD LENGTH=249
	IRGSP	Os01t0820400-00	Similar to WRKY22 - superfamily of TFs having WRKY and zinc finger domains.
	nr	gb|ABA96294.1|	WRKY DNA binding domain containing protein, expressed [Oryza sativa Japonica Group] gi|125578297|gb|EAZ19443.1| hypothetical protein OsJ_35004 [Oryza sativa Japonica Group]
CL5930.Contig1_F1_Leaf	TAIR	AT1G62300.1	| Symbols: WRKY6, ATWRKY6 | WRKY family transcription factor | chr1:23016887-23019155 REVERSE LENGTH=553
	IRGSP	Os05t0137500-00	Similar to WRKY transcription factor 5.
	nr	ref|XP_002518444.1|	WRKY transcription factor, putative [Ricinus communis] gi|223542289|gb|EEF43831.1| WRKY transcription factor, putative [Ricinus communis]
CL6147.Contig1_F1_Leaf	TAIR	AT5G56270.1	| Symbols: WRKY2, ATWRKY2 | WRKY DNA-binding protein 2 | chr5:22780816-22783137 FORWARD LENGTH=687
	IRGSP	Os09t0481700-02	SUSIBA2-like (WRKY transcription factor 80).
	nr	gb|ADL36865.1|	WRKY domain class transcription factor [Malus x domestica]
CL63.Contig1_F1_Leaf	TAIR	AT1G13960.1	| Symbols: WRKY4 | WRKY DNA-binding protein 4 | chr1:4776622-4779043 FORWARD LENGTH=514
	IRGSP	Os12t0507300-00	Similar to WRKY DNA binding domain containing protein, expressed.
	nr	gb|AAT46067.1|	DNA binding protein WRKY2 [Vitis vinifera]
CL63.Contig2_F1_Leaf	TAIR	AT2G03340.1	| Symbols: WRKY3 | WRKY DNA-binding protein 3 | chr2:1014724-1016936 REVERSE LENGTH=513
	IRGSP	Os12t0507300-00	Similar to WRKY DNA binding domain containing protein, expressed.
	nr	dbj|BAJ16351.1|	hypothetical protein [Papaver somniferum]
CL6615.Contig1_F1_Leaf	TAIR	AT1G04640.2	| Symbols: LIP2 | lipoyltransferase 2 | chr1:1292541-1293248 FORWARD LENGTH=235
	IRGSP	Os03t0321800-02	Similar to WRKY transcription factor 55.
	nr	ref|XP_002525976.1|	lipoate-protein ligase B, putative [Ricinus communis] gi|223534708|gb|EEF36400.1| lipoate-protein ligase B, putative [Ricinus communis]
CL6703.Contig1_F1_Leaf	TAIR	AT5G24110.1	| Symbols: WRKY30, ATWRKY30 | WRKY DNA-binding protein 30 | chr5:8153416-8154633 REVERSE LENGTH=303
	IRGSP	Os01t0656400-00	Similar to WRKY transcription factor 15.
	nr	gb|EOY23457.1|	WRKY DNA-binding protein 30, putative [Theobroma cacao]
CL6703.Contig2_F1_Leaf	TAIR	AT5G24110.1	| Symbols: WRKY30, ATWRKY30 | WRKY DNA-binding protein 30 | chr5:8153416-8154633 REVERSE LENGTH=303
	IRGSP	Os01t0656400-00	Similar to WRKY transcription factor 15.
	nr	gb|EOY23457.1|	WRKY DNA-binding protein 30, putative [Theobroma cacao]
CL6869.Contig1_F1_Leaf	TAIR	AT2G38470.1	| Symbols: WRKY33, ATWRKY33 | WRKY DNA-binding protein 33 | chr2:16108476-16110539 FORWARD LENGTH=519
	IRGSP	Os05t0343400-01	WRKY transcription factor 53 (Transcription factor WRKY12).
	nr	gb|EMJ06226.1|	hypothetical protein PRUPE_ppa004009mg [Prunus persica]
CL6869.Contig2_F1_Leaf	TAIR	AT2G38470.1	| Symbols: WRKY33, ATWRKY33 | WRKY DNA-binding protein 33 | chr2:16108476-16110539 FORWARD LENGTH=519
	IRGSP	Os01t0826400-01	WRKY transcription factor 24 (WRKY24).
	nr	gb|EMJ06226.1|	hypothetical protein PRUPE_ppa004009mg [Prunus persica]
CL812.Contig1_F1_Leaf	TAIR	AT4G31550.2	| Symbols: WRKY11, ATWRKY11 | WRKY DNA-binding protein 11 | chr4:15290065-15291458 REVERSE LENGTH=324
	IRGSP	Os04t0287400-01	Similar to WRKY transcription factor 51.
	nr	emb|CBI17876.3|	unnamed protein product [Vitis vinifera]
CL812.Contig2_F1_Leaf	TAIR	AT4G31550.2	| Symbols: WRKY11, ATWRKY11 | WRKY DNA-binding protein 11 | chr4:15290065-15291458 REVERSE LENGTH=324
	IRGSP	Os04t0287400-01	Similar to WRKY transcription factor 51.
	nr	emb|CBI17876.3|	unnamed protein product [Vitis vinifera]
Unigene10505_F1_Leaf	TAIR	AT5G13080.1	| Symbols: WRKY75, ATWRKY75 | WRKY DNA-binding protein 75 | chr5:4149928-4151019 REVERSE LENGTH=145
	IRGSP	Os11t0490900-01	Similar to WRKY transcription factor 72.
	nr	tpg|DAA41982.1|	TPA: putative WRKY DNA-binding domain superfamily protein [Zea mays]
Unigene1103_F1_Leaf	TAIR	--No_Hits--
	IRGSP	Os12t0116700-01	Similar to WRKY transcription factor 64.
	nr	--No_Hits--
Unigene11629_F1_Leaf	TAIR	AT4G26640.2	| Symbols: WRKY20, AtWRKY20 | WRKY family transcription factor family protein | chr4:13437298-13440693 REVERSE LENGTH=557
	IRGSP	Os07t0583700-01	WRKY transcription factor 78.
	nr	gb|EAZ04490.1|	hypothetical protein OsI_26641 [Oryza sativa Indica Group]
Unigene17604_F1_Leaf	TAIR	AT2G38470.1	| Symbols: WRKY33, ATWRKY33 | WRKY DNA-binding protein 33 | chr2:16108476-16110539 FORWARD LENGTH=519
	IRGSP	Os01t0826400-01	WRKY transcription factor 24 (WRKY24).
	nr	gb|AGJ52154.1|	WRKY transcription factor 08 [Jatropha curcas]
Unigene17605_F1_Leaf	TAIR	AT4G26440.1	| Symbols: WRKY34, ATWRKY34, MSP3 | WRKY DNA-binding protein 34 | chr4:13357596-13359550 REVERSE LENGTH=568
	IRGSP	Os01t0826400-01	WRKY transcription factor 24 (WRKY24).
	nr	dbj|BAA77383.1|	transcription factor NtWRKY2 [Nicotiana tabacum]
Unigene20119_F1_Leaf	TAIR	AT3G04670.1	| Symbols: WRKY39, ATWRKY39 | WRKY DNA-binding protein 39 | chr3:1266530-1267691 REVERSE LENGTH=330
	IRGSP	Os12t0597700-01	Similar to WRKY2 (Fragment).
	nr	ref|XP_002520995.1|	WRKY transcription factor, putative [Ricinus communis] gi|223539832|gb|EEF41412.1| WRKY transcription factor, putative [Ricinus communis]
Unigene24823_F1_Leaf	TAIR	AT1G13960.2	| Symbols: WRKY4 | WRKY DNA-binding protein 4 | chr1:4776622-4779043 FORWARD LENGTH=487
	IRGSP	Os12t0507300-00	Similar to WRKY DNA binding domain containing protein, expressed.
	nr	ref|XP_003571606.1|	PREDICTED: probable WRKY transcription factor 4-like [Brachypodium distachyon]
Unigene28656_F1_Leaf	TAIR	--No_Hits--
	IRGSP	Os11t0117500-01	DNA-binding WRKY domain containing protein.
	nr	--No_Hits--
Unigene29310_F1_Leaf	TAIR	AT1G80840.1	| Symbols: WRKY40, ATWRKY40 | WRKY DNA-binding protein 40 | chr1:30383834-30385356 FORWARD LENGTH=302
	IRGSP	Os06t0649000-02	Similar to WRKY transcription factor 28.
	nr	gb|ADU02585.1|	WRKY transcription factor 4 [Vitis vinifera]
Unigene29411_F1_Leaf	TAIR	AT3G56400.1	| Symbols: WRKY70, ATWRKY70 | WRKY DNA-binding protein 70 | chr3:20909082-20910409 REVERSE LENGTH=294
	IRGSP	Os05t0322900-01	Similar to WRKY transcription factor 45.
	nr	ref|XP_003566383.1|	PREDICTED: uncharacterized protein LOC100836752 [Brachypodium distachyon]
Unigene29516_F1_Leaf	TAIR	--No_Hits--
	IRGSP	--No_Hits--
	nr	ref|XP_003519273.1|	PREDICTED: probable WRKY transcription factor 33 [Glycine max]
Unigene29588_F1_Leaf	TAIR	AT5G49520.1	| Symbols: WRKY48, ATWRKY48 | WRKY DNA-binding protein 48 | chr5:20090890-20092867 FORWARD LENGTH=399
	IRGSP	Os05t0565900-00	DNA-binding WRKY domain containing protein.
	nr	ref|XP_002279385.1|	PREDICTED: probable WRKY transcription factor 48 [Vitis vinifera] gi|296083226|emb|CBI22862.3| unnamed protein product [Vitis vinifera]
Unigene30222_F1_Leaf	TAIR	AT1G04640.2	| Symbols: LIP2 | lipoyltransferase 2 | chr1:1292541-1293248 FORWARD LENGTH=235
	IRGSP	Os03t0321800-02	Similar to WRKY transcription factor 55.
	nr	ref|XP_002297668.1|	predicted protein [Populus trichocarpa] gi|222844926|gb|EEE82473.1| predicted protein [Populus trichocarpa]
Unigene30527_F1_Leaf	TAIR	AT4G01250.1	| Symbols: WRKY22, AtWRKY22 | WRKY family transcription factor | chr4:522839-524129 REVERSE LENGTH=298
	IRGSP	Os02t0265200-01	WRKY transcription factor 39.
	nr	ref|XP_004492798.1|	PREDICTED: WRKY transcription factor 22-like [Cicer arietinum]
Unigene32012_F1_Leaf	TAIR	AT2G34830.1	| Symbols: WRKY35, MEE24, AtWRKY35 | WRKY DNA-binding protein 35 | chr2:14693839-14696378 REVERSE LENGTH=427
	IRGSP	Os04t0597300-01	Similar to WERKY protein (Fragment).
	nr	emb|CBI31090.3|	unnamed protein product [Vitis vinifera]
Unigene32573_F1_Leaf	TAIR	AT1G70060.1	| Symbols: SNL4 | SIN3-like 4 | chr1:26383789-26389568 FORWARD LENGTH=1326
	IRGSP	Os01t0109700-01	Similar to Paired amphipathic helix repeat-containing protein / transcription regulator-related.
	nr	gb|EOY00289.1|	WRKY domain class transcription factor [Theobroma cacao]
Unigene34342_F1_Leaf	TAIR	AT2G34830.1	| Symbols: WRKY35, MEE24, AtWRKY35 | WRKY DNA-binding protein 35 | chr2:14693839-14696378 REVERSE LENGTH=427
	IRGSP	Os01t0750100-03	Similar to WRKY13 transcription factor.
	nr	ref|XP_002270750.2|	PREDICTED: LOW QUALITY PROTEIN: WRKY transcription factor 22 [Vitis vinifera]
Unigene6768_F1_Leaf	TAIR	AT5G64810.1	| Symbols: WRKY51, ATWRKY51 | WRKY DNA-binding protein 51 | chr5:25908415-25909687 FORWARD LENGTH=194
	IRGSP	Os05t0537100-00	WRKY transcription factor 10.
	nr	gb|ADF42578.1|	putative pathogenesis protein [Phyllostachys edulis]
Unigene9918_F1_Leaf	TAIR	AT5G64810.1	| Symbols: WRKY51, ATWRKY51 | WRKY DNA-binding protein 51 | chr5:25908415-25909687 FORWARD LENGTH=194
	IRGSP	Os05t0537100-00	WRKY transcription factor 10.
	nr	ref|XP_002440147.1|	hypothetical protein SORBIDRAFT_09g026830 [Sorghum bicolor] gi|241945432|gb|EES18577.1| hypothetical protein SORBIDRAFT_09g026830 [Sorghum bicolor]
Unigene9919_F1_Leaf	TAIR	AT5G64810.1	| Symbols: WRKY51, ATWRKY51 | WRKY DNA-binding protein 51 | chr5:25908415-25909687 FORWARD LENGTH=194
	IRGSP	Os05t0537100-00	WRKY transcription factor 10.
	nr	gb|AFW78902.1|	putative WRKY DNA-binding domain superfamily protein [Zea mays]
CL1838.Contig1_A.roylei_Leaf	TAIR	AT1G80840.1	| Symbols: WRKY40, ATWRKY40 | WRKY DNA-binding protein 40 | chr1:30383834-30385356 FORWARD LENGTH=302
	IRGSP	Os06t0649000-02	Similar to WRKY transcription factor 28.
	nr	gb|EOY26053.1|	WRKY DNA-binding protein 40, putative isoform 2 [Theobroma cacao]
CL1838.Contig2_A.roylei_Leaf	TAIR	--No_Hits--
	IRGSP	Os06t0649000-02	Similar to WRKY transcription factor 28.
	nr	ref|XP_002303852.1|	predicted protein [Populus trichocarpa] gi|118487935|gb|ABK95789.1| unknown [Populus trichocarpa] gi|222841284|gb|EEE78831.1| predicted protein [Populus trichocarpa]
CL2065.Contig2_A.roylei_Leaf	TAIR	AT2G38470.1	| Symbols: WRKY33, ATWRKY33 | WRKY DNA-binding protein 33 | chr2:16108476-16110539 FORWARD LENGTH=519
	IRGSP	Os01t0826400-01	WRKY transcription factor 24 (WRKY24).
	nr	gb|EOY34631.1|	WRKY DNA-binding protein 33 isoform 1 [Theobroma cacao]
CL2065.Contig3_A.roylei_Leaf	TAIR	AT2G38470.1	| Symbols: WRKY33, ATWRKY33 | WRKY DNA-binding protein 33 | chr2:16108476-16110539 FORWARD LENGTH=519
	IRGSP	Os05t0343400-01	WRKY transcription factor 53 (Transcription factor WRKY12).
	nr	gb|AAC31956.1|	zinc finger protein [Pimpinella brachycarpa]
CL2190.Contig1_A.roylei_Leaf	TAIR	AT1G04640.2	| Symbols: LIP2 | lipoyltransferase 2 | chr1:1292541-1293248 FORWARD LENGTH=235
	IRGSP	Os03t0321800-02	Similar to WRKY transcription factor 55.
	nr	ref|XP_002525976.1|	lipoate-protein ligase B, putative [Ricinus communis] gi|223534708|gb|EEF36400.1| lipoate-protein ligase B, putative [Ricinus communis]
CL2190.Contig2_A.roylei_Leaf	TAIR	AT1G04640.2	| Symbols: LIP2 | lipoyltransferase 2 | chr1:1292541-1293248 FORWARD LENGTH=235
	IRGSP	Os03t0321800-02	Similar to WRKY transcription factor 55.
	nr	ref|XP_002525976.1|	lipoate-protein ligase B, putative [Ricinus communis] gi|223534708|gb|EEF36400.1| lipoate-protein ligase B, putative [Ricinus communis]
CL3309.Contig1_A.roylei_Leaf	TAIR	AT1G80590.1	| Symbols: WRKY66, ATWRKY66 | WRKY DNA-binding protein 66 | chr1:30296210-30297156 REVERSE LENGTH=235
	IRGSP	Os12t0116700-01	Similar to WRKY transcription factor 64.
	nr	gb|AFW64632.1|	putative WRKY DNA-binding domain superfamily protein [Zea mays]
CL3309.Contig2_A.roylei_Leaf	TAIR	AT1G80590.1	| Symbols: WRKY66, ATWRKY66 | WRKY DNA-binding protein 66 | chr1:30296210-30297156 REVERSE LENGTH=235
	IRGSP	Os12t0116700-01	Similar to WRKY transcription factor 64.
	nr	gb|AFW64632.1|	putative WRKY DNA-binding domain superfamily protein [Zea mays]
CL3521.Contig1_A.roylei_Leaf	TAIR	AT2G38470.1	| Symbols: WRKY33, ATWRKY33 | WRKY DNA-binding protein 33 | chr2:16108476-16110539 FORWARD LENGTH=519
	IRGSP	Os05t0343400-01	WRKY transcription factor 53 (Transcription factor WRKY12).
	nr	gb|EOY34631.1|	WRKY DNA-binding protein 33 isoform 1 [Theobroma cacao]
CL3521.Contig2_A.roylei_Leaf	TAIR	AT2G38470.1	| Symbols: WRKY33, ATWRKY33 | WRKY DNA-binding protein 33 | chr2:16108476-16110539 FORWARD LENGTH=519
	IRGSP	Os01t0826400-01	WRKY transcription factor 24 (WRKY24).
	nr	gb|ACY39878.1|	WRKY transcription factor 7 [Parajubaea cocoides]
CL4171.Contig1_A.roylei_Leaf	TAIR	AT2G30590.1	| Symbols: WRKY21 | WRKY DNA-binding protein 21 | chr2:13033891-13035303 FORWARD LENGTH=380
	IRGSP	Os12t0597700-02	Similar to WRKY DNA binding domain containing protein, expressed.
	nr	ref|NP_001067197.1|	Os12g0597700 [Oryza sativa Japonica Group] gi|77556448|gb|ABA99244.1| WRKY DNA binding domain containing protein, expressed [Oryza sativa Japonica Group] gi|113649704|dbj|BAF30216.1| Os12g0597700 [Oryza sativa Japonica Group]
CL4171.Contig2_A.roylei_Leaf	TAIR	AT2G30590.1	| Symbols: WRKY21 | WRKY DNA-binding protein 21 | chr2:13033891-13035303 FORWARD LENGTH=380
	IRGSP	Os12t0597700-02	Similar to WRKY DNA binding domain containing protein, expressed.
	nr	ref|XP_002520995.1|	WRKY transcription factor, putative [Ricinus communis] gi|223539832|gb|EEF41412.1| WRKY transcription factor, putative [Ricinus communis]
CL5523.Contig1_A.roylei_Leaf	TAIR	AT3G56400.1	| Symbols: WRKY70, ATWRKY70 | WRKY DNA-binding protein 70 | chr3:20909082-20910409 REVERSE LENGTH=294
	IRGSP	Os05t0478400-00	Similar to WRKY transcription factor 48.
	nr	ref|XP_003566135.1|	PREDICTED: probable WRKY transcription factor 54-like [Brachypodium distachyon]
CL5523.Contig2_A.roylei_Leaf	TAIR	AT2G40750.1	| Symbols: WRKY54, ATWRKY54 | WRKY DNA-binding protein 54 | chr2:17000636-17002354 REVERSE LENGTH=346
	IRGSP	Os05t0478400-00	Similar to WRKY transcription factor 48.
	nr	gb|EOY04438.1|	WRKY DNA-binding protein 70, putative isoform 1 [Theobroma cacao]
CL5617.Contig1_A.roylei_Leaf	TAIR	AT4G11070.1	| Symbols: WRKY41, AtWRKY41 | WRKY family transcription factor | chr4:6759303-6760763 FORWARD LENGTH=313
	IRGSP	Os08t0386200-01	WRKY transcription factor 69.
	nr	ref|XP_002302620.1|	predicted protein [Populus trichocarpa] gi|222844346|gb|EEE81893.1| predicted protein [Populus trichocarpa]
CL5617.Contig2_A.roylei_Leaf	TAIR	AT4G11070.2	| Symbols: WRKY41, AtWRKY41 | WRKY family transcription factor | chr4:6759303-6760763 FORWARD LENGTH=281
	IRGSP	Os06t0158100-00	Similar to WRKY transcription factor 63.
	nr	ref|XP_002509941.1|	hypothetical protein RCOM_1691430 [Ricinus communis] gi|223549840|gb|EEF51328.1| hypothetical protein RCOM_1691430 [Ricinus communis]
CL5897.Contig1_A.roylei_Leaf	TAIR	AT5G56270.1	| Symbols: WRKY2, ATWRKY2 | WRKY DNA-binding protein 2 | chr5:22780816-22783137 FORWARD LENGTH=687
	IRGSP	Os04t0471700-00	Similar to WRKY10 (WRKY transcription factor 35).
	nr	gb|ADL36865.1|	WRKY domain class transcription factor [Malus x domestica]
CL5919.Contig1_A.roylei_Leaf	TAIR	AT1G29280.1	| Symbols: WRKY65, ATWRKY65 | WRKY DNA-binding protein 65 | chr1:10236589-10237467 FORWARD LENGTH=259
	IRGSP	Os01t0750100-03	Similar to WRKY13 transcription factor.
	nr	ref|XP_002269267.1|	PREDICTED: probable WRKY transcription factor 65 [Vitis vinifera] gi|297740534|emb|CBI30716.3| unnamed protein product [Vitis vinifera]
CL5919.Contig2_A.roylei_Leaf	TAIR	AT1G29280.1	| Symbols: WRKY65, ATWRKY65 | WRKY DNA-binding protein 65 | chr1:10236589-10237467 FORWARD LENGTH=259
	IRGSP	Os01t0750100-03	Similar to WRKY13 transcription factor.
	nr	ref|XP_002269267.1|	PREDICTED: probable WRKY transcription factor 65 [Vitis vinifera] gi|297740534|emb|CBI30716.3| unnamed protein product [Vitis vinifera]
CL793.Contig2_A.roylei_Leaf	TAIR	AT2G38470.1	| Symbols: WRKY33, ATWRKY33 | WRKY DNA-binding protein 33 | chr2:16108476-16110539 FORWARD LENGTH=519
	IRGSP	Os01t0826400-01	WRKY transcription factor 24 (WRKY24).
	nr	emb|CBI15865.3|	unnamed protein product [Vitis vinifera]
Unigene12135_A.roylei_Leaf	TAIR	AT2G38470.1	| Symbols: WRKY33, ATWRKY33 | WRKY DNA-binding protein 33 | chr2:16108476-16110539 FORWARD LENGTH=519
	IRGSP	Os05t0343400-01	WRKY transcription factor 53 (Transcription factor WRKY12).
	nr	gb|EMJ06226.1|	hypothetical protein PRUPE_ppa004009mg [Prunus persica]
Unigene12361_A.roylei_Leaf	TAIR	AT2G03340.1	| Symbols: WRKY3 | WRKY DNA-binding protein 3 | chr2:1014724-1016936 REVERSE LENGTH=513
	IRGSP	Os12t0507300-00	Similar to WRKY DNA binding domain containing protein, expressed.
	nr	gb|ADL36852.1|	WRKY domain class transcription factor [Malus x domestica]
Unigene12362_A.roylei_Leaf	TAIR	AT1G13960.1	| Symbols: WRKY4 | WRKY DNA-binding protein 4 | chr1:4776622-4779043 FORWARD LENGTH=514
	IRGSP	Os12t0507300-00	Similar to WRKY DNA binding domain containing protein, expressed.
	nr	gb|AAT46067.1|	DNA binding protein WRKY2 [Vitis vinifera]
Unigene12688_A.roylei_Leaf	TAIR	AT3G56400.1	| Symbols: WRKY70, ATWRKY70 | WRKY DNA-binding protein 70 | chr3:20909082-20910409 REVERSE LENGTH=294
	IRGSP	Os11t0116900-01	Similar to WRKY DNA binding domain containing protein, expressed.
	nr	ref|NP_001065590.1|	Os11g0116900 [Oryza sativa Japonica Group] gi|113644294|dbj|BAF27435.1| Os11g0116900, partial [Oryza sativa Japonica Group]
Unigene16723_A.roylei_Leaf	TAIR	AT2G38470.1	| Symbols: WRKY33, ATWRKY33 | WRKY DNA-binding protein 33 | chr2:16108476-16110539 FORWARD LENGTH=519
	IRGSP	--No_Hits--
	nr	--No_Hits--
Unigene17330_A.roylei_Leaf	TAIR	AT4G26640.2	| Symbols: WRKY20, AtWRKY20 | WRKY family transcription factor family protein | chr4:13437298-13440693 REVERSE LENGTH=557
	IRGSP	Os07t0583700-01	WRKY transcription factor 78.
	nr	ref|XP_002529048.1|	WRKY transcription factor, putative [Ricinus communis] gi|223531528|gb|EEF33359.1| WRKY transcription factor, putative [Ricinus communis]
Unigene17331_A.roylei_Leaf	TAIR	AT4G26640.2	| Symbols: WRKY20, AtWRKY20 | WRKY family transcription factor family protein | chr4:13437298-13440693 REVERSE LENGTH=557
	IRGSP	Os07t0583700-01	WRKY transcription factor 78.
	nr	gb|EAZ04490.1|	hypothetical protein OsI_26641 [Oryza sativa Indica Group]
Unigene17726_A.roylei_Leaf	TAIR	AT4G26640.2	| Symbols: WRKY20, AtWRKY20 | WRKY family transcription factor family protein | chr4:13437298-13440693 REVERSE LENGTH=557
	IRGSP	Os07t0583700-01	WRKY transcription factor 78.
	nr	gb|AFZ45987.1|	WRKYS2 transcription factor, partial [Oryza sativa Japonica Group]
Unigene18417_A.roylei_Leaf	TAIR	--No_Hits--
	IRGSP	Os12t0116700-01	Similar to WRKY transcription factor 64.
	nr	gb|ABA95641.1|	WRKY DNA binding domain containing protein [Oryza sativa Japonica Group] gi|83320253|gb|ABC02811.1| WRKY transcription factor 64 [Oryza sativa] gi|125596419|gb|EAZ36199.1| hypothetical protein OsJ_20513 [Oryza sativa Japonica Group]
Unigene18703_A.roylei_Leaf	TAIR	--No_Hits--
	IRGSP	Os03t0657400-00	Hypothetical conserved gene.
	nr	ref|NP_001050814.2|	Os03g0657400 [Oryza sativa Japonica Group] gi|46394374|tpg|DAA05125.1| TPA_inf: WRKY transcription factor 60 [Oryza sativa (indica cultivar-group)] gi|125545112|gb|EAY91251.1| hypothetical protein OsI_12866 [Oryza sativa Indica Group] gi|255674758|dbj|BAF12728.2| Os03g0657400 [Oryza sativa Japonica Group]
Unigene21414_A.roylei_Leaf	TAIR	AT2G38470.1	| Symbols: WRKY33, ATWRKY33 | WRKY DNA-binding protein 33 | chr2:16108476-16110539 FORWARD LENGTH=519
	IRGSP	Os01t0826400-01	WRKY transcription factor 24 (WRKY24).
	nr	gb|EOY34631.1|	WRKY DNA-binding protein 33 isoform 1 [Theobroma cacao]
Unigene22218_A.roylei_Leaf	TAIR	AT5G64810.1	| Symbols: WRKY51, ATWRKY51 | WRKY DNA-binding protein 51 | chr5:25908415-25909687 FORWARD LENGTH=194
	IRGSP	Os05t0537100-00	WRKY transcription factor 10.
	nr	ref|XP_002440147.1|	hypothetical protein SORBIDRAFT_09g026830 [Sorghum bicolor] gi|241945432|gb|EES18577.1| hypothetical protein SORBIDRAFT_09g026830 [Sorghum bicolor]
Unigene2301_A.roylei_Leaf	TAIR	AT2G34830.1	| Symbols: WRKY35, MEE24, AtWRKY35 | WRKY DNA-binding protein 35 | chr2:14693839-14696378 REVERSE LENGTH=427
	IRGSP	Os04t0597300-01	Similar to WERKY protein (Fragment).
	nr	gb|EOY25617.1|	WRKY DNA-binding protein 14, putative [Theobroma cacao]
Unigene24972_A.roylei_Leaf	TAIR	AT1G80840.1	| Symbols: WRKY40, ATWRKY40 | WRKY DNA-binding protein 40 | chr1:30383834-30385356 FORWARD LENGTH=302
	IRGSP	Os06t0649000-02	Similar to WRKY transcription factor 28.
	nr	gb|ADU02585.1|	WRKY transcription factor 4 [Vitis vinifera]
Unigene25193_A.roylei_Leaf	TAIR	AT4G31550.2	| Symbols: WRKY11, ATWRKY11 | WRKY DNA-binding protein 11 | chr4:15290065-15291458 REVERSE LENGTH=324
	IRGSP	Os04t0287400-01	Similar to WRKY transcription factor 51.
	nr	emb|CBI17876.3|	unnamed protein product [Vitis vinifera]
Unigene25715_A.roylei_Leaf	TAIR	AT5G64810.1	| Symbols: WRKY51, ATWRKY51 | WRKY DNA-binding protein 51 | chr5:25908415-25909687 FORWARD LENGTH=194
	IRGSP	Os05t0537100-00	WRKY transcription factor 10.
	nr	gb|AFW78902.1|	putative WRKY DNA-binding domain superfamily protein [Zea mays]
Unigene26127_A.roylei_Leaf	TAIR	AT5G49520.1	| Symbols: WRKY48, ATWRKY48 | WRKY DNA-binding protein 48 | chr5:20090890-20092867 FORWARD LENGTH=399
	IRGSP	Os05t0565900-00	DNA-binding WRKY domain containing protein.
	nr	ref|XP_002279385.1|	PREDICTED: probable WRKY transcription factor 48 [Vitis vinifera] gi|296083226|emb|CBI22862.3| unnamed protein product [Vitis vinifera]
Unigene26957_A.roylei_Leaf	TAIR	AT1G13960.2	| Symbols: WRKY4 | WRKY DNA-binding protein 4 | chr1:4776622-4779043 FORWARD LENGTH=487
	IRGSP	Os08t0499300-01	WRKY transcription factor 30.
	nr	ref|XP_003571606.1|	PREDICTED: probable WRKY transcription factor 4-like [Brachypodium distachyon]
Unigene27343_A.roylei_Leaf	TAIR	AT5G56270.1	| Symbols: WRKY2, ATWRKY2 | WRKY DNA-binding protein 2 | chr5:22780816-22783137 FORWARD LENGTH=687
	IRGSP	Os09t0481700-02	SUSIBA2-like (WRKY transcription factor 80).
	nr	ref|XP_002529203.1|	conserved hypothetical protein [Ricinus communis] gi|223531321|gb|EEF33159.1| conserved hypothetical protein [Ricinus communis]
Unigene28078_A.roylei_Leaf	TAIR	AT5G56270.1	| Symbols: WRKY2, ATWRKY2 | WRKY DNA-binding protein 2 | chr5:22780816-22783137 FORWARD LENGTH=687
	IRGSP	Os08t0499300-01	WRKY transcription factor 30.
	nr	ref|XP_003522837.1|	PREDICTED: probable WRKY transcription factor 2-like [Glycine max]
Unigene28329_A.roylei_Leaf	TAIR	AT1G28280.2	| Symbols: | VQ motif-containing protein | chr1:9886297-9887395 REVERSE LENGTH=243
	IRGSP	Os01t0201250-00	Similar to DNA-binding WRKY.
	nr	ref|XP_004244236.1|	PREDICTED: uncharacterized protein LOC101257285 [Solanum lycopersicum]
Unigene2871_A.roylei_Leaf	TAIR	AT3G58710.2	| Symbols: WRKY69, ATWRKY69 | WRKY DNA-binding protein 69 | chr3:21715192-21716766 FORWARD LENGTH=271
	IRGSP	Os02t0265200-01	WRKY transcription factor 39.
	nr	ref|NP_001046497.1|	Os02g0265200 [Oryza sativa Japonica Group] gi|50251953|dbj|BAD27888.1| putative WRKY transcription factor [Oryza sativa Japonica Group] gi|113536028|dbj|BAF08411.1| Os02g0265200 [Oryza sativa Japonica Group] gi|215694932|dbj|BAG90123.1| unnamed protein product [Oryza sativa Japonica Group] gi|222622565|gb|EEE56697.1| hypothetical protein OsJ_06167 [Oryza sativa Japonica Group]
Unigene34079_A.roylei_Leaf	TAIR	AT5G52830.1	| Symbols: WRKY27, ATWRKY27 | WRKY DNA-binding protein 27 | chr5:21410996-21412218 FORWARD LENGTH=348
	IRGSP	Os02t0265200-01	WRKY transcription factor 39.
	nr	ref|XP_004492798.1|	PREDICTED: WRKY transcription factor 22-like [Cicer arietinum]
Unigene36001_A.roylei_Leaf	TAIR	AT4G04450.1	| Symbols: WRKY42, AtWRKY42 | WRKY family transcription factor | chr4:2218379-2221113 FORWARD LENGTH=528
	IRGSP	Os01t0289600-00	Similar to WRKY transcription factor 28.
	nr	ref|XP_002524838.1|	WRKY transcription factor, putative [Ricinus communis] gi|223535898|gb|EEF37558.1| WRKY transcription factor, putative [Ricinus communis]
Unigene36072_A.roylei_Leaf	TAIR	AT1G04640.2	| Symbols: LIP2 | lipoyltransferase 2 | chr1:1292541-1293248 FORWARD LENGTH=235
	IRGSP	Os03t0321800-02	Similar to WRKY transcription factor 55.
	nr	ref|XP_002297668.1|	predicted protein [Populus trichocarpa] gi|222844926|gb|EEE82473.1| predicted protein [Populus trichocarpa]
Unigene4478_A.roylei_Leaf	TAIR	AT2G34830.1	| Symbols: WRKY35, MEE24, AtWRKY35 | WRKY DNA-binding protein 35 | chr2:14693839-14696378 REVERSE LENGTH=427
	IRGSP	Os04t0597300-01	Similar to WERKY protein (Fragment).
	nr	ref|XP_002270750.2|	PREDICTED: LOW QUALITY PROTEIN: WRKY transcription factor 22 [Vitis vinifera]
Unigene5406_A.roylei_Leaf	TAIR	AT5G13080.1	| Symbols: WRKY75, ATWRKY75 | WRKY DNA-binding protein 75 | chr5:4149928-4151019 REVERSE LENGTH=145
	IRGSP	Os11t0490900-01	Similar to WRKY transcription factor 72.
	nr	tpg|DAA41982.1|	TPA: putative WRKY DNA-binding domain superfamily protein [Zea mays]
Unigene5600_A.roylei_Leaf	TAIR	AT5G24110.1	| Symbols: WRKY30, ATWRKY30 | WRKY DNA-binding protein 30 | chr5:8153416-8154633 REVERSE LENGTH=303
	IRGSP	Os01t0656400-00	Similar to WRKY transcription factor 15.
	nr	gb|EOY23457.1|	WRKY DNA-binding protein 30, putative [Theobroma cacao]
Unigene5704_A.roylei_Leaf	TAIR	--No_Hits--
	IRGSP	Os05t0343400-01	WRKY transcription factor 53 (Transcription factor WRKY12).
	nr	ref|XP_004490681.1|	PREDICTED: probable WRKY transcription factor 33-like [Cicer arietinum]
Unigene5894_A.roylei_Leaf	TAIR	AT3G04670.2	| Symbols: WRKY39, ATWRKY39 | WRKY DNA-binding protein 39 | chr3:1266737-1267691 REVERSE LENGTH=290
	IRGSP	Os03t0741400-01	Similar to SUSIBA2.
	nr	gb|AAL75474.1|	DNA binding protein [Elaeis oleifera]
Unigene7020_A.roylei_Leaf	TAIR	AT1G62300.1	| Symbols: WRKY6, ATWRKY6 | WRKY family transcription factor | chr1:23016887-23019155 REVERSE LENGTH=553
	IRGSP	Os05t0137500-00	Similar to WRKY transcription factor 5.
	nr	ref|XP_002518444.1|	WRKY transcription factor, putative [Ricinus communis] gi|223542289|gb|EEF43831.1| WRKY transcription factor, putative [Ricinus communis]
Unigene7021_A.roylei_Leaf	TAIR	--No_Hits--
	IRGSP	--No_Hits--
	nr	gb|AFH01342.1|	WRKY4 transcription factor, partial [Gossypium hirsutum]
Unigene7133_A.roylei_Leaf	TAIR	AT3G56400.1	| Symbols: WRKY70, ATWRKY70 | WRKY DNA-binding protein 70 | chr3:20909082-20910409 REVERSE LENGTH=294
	IRGSP	Os05t0322900-01	Similar to WRKY transcription factor 45.
	nr	ref|XP_003566383.1|	PREDICTED: uncharacterized protein LOC100836752 [Brachypodium distachyon]
Unigene7891_A.roylei_Leaf	TAIR	AT3G56400.1	| Symbols: WRKY70, ATWRKY70 | WRKY DNA-binding protein 70 | chr3:20909082-20910409 REVERSE LENGTH=294
	IRGSP	Os11t0117500-01	DNA-binding WRKY domain containing protein.
	nr	gb|ABA96294.1|	WRKY DNA binding domain containing protein, expressed [Oryza sativa Japonica Group] gi|125578297|gb|EAZ19443.1| hypothetical protein OsJ_35004 [Oryza sativa Japonica Group]
CL2190.Contig1_F1_Bulb	TAIR	AT1G80840.1	| Symbols: WRKY40, ATWRKY40 | WRKY DNA-binding protein 40 | chr1:30383834-30385356 FORWARD LENGTH=302
	IRGSP	Os09t0417600-02	WRKY transcription factor 76.
	nr	gb|EOY26053.1|	WRKY DNA-binding protein 40, putative isoform 2 [Theobroma cacao]
CL2190.Contig2_F1_Bulb	TAIR	AT1G80840.1	| Symbols: WRKY40, ATWRKY40 | WRKY DNA-binding protein 40 | chr1:30383834-30385356 FORWARD LENGTH=302
	IRGSP	Os09t0417600-02	WRKY transcription factor 76.
	nr	gb|EOY26053.1|	WRKY DNA-binding protein 40, putative isoform 2 [Theobroma cacao]
CL2972.Contig1_F1_Bulb	TAIR	AT2G03340.1	| Symbols: WRKY3 | WRKY DNA-binding protein 3 | chr2:1014724-1016936 REVERSE LENGTH=513
	IRGSP	Os12t0507300-00	Similar to WRKY DNA binding domain containing protein, expressed.
	nr	gb|AAT46067.1|	DNA binding protein WRKY2 [Vitis vinifera]
CL2972.Contig2_F1_Bulb	TAIR	AT2G03340.1	| Symbols: WRKY3 | WRKY DNA-binding protein 3 | chr2:1014724-1016936 REVERSE LENGTH=513
	IRGSP	Os12t0507300-00	Similar to WRKY DNA binding domain containing protein, expressed.
	nr	dbj|BAJ16351.1|	hypothetical protein [Papaver somniferum]
CL5279.Contig1_F1_Bulb	TAIR	AT1G29280.1	| Symbols: WRKY65, ATWRKY65 | WRKY DNA-binding protein 65 | chr1:10236589-10237467 FORWARD LENGTH=259
	IRGSP	Os01t0730700-01	WRKY transcription factor 14 (WRKY14).
	nr	ref|XP_002269267.1|	PREDICTED: probable WRKY transcription factor 65 [Vitis vinifera] gi|297740534|emb|CBI30716.3| unnamed protein product [Vitis vinifera]
CL5279.Contig2_F1_Bulb	TAIR	AT1G29280.1	| Symbols: WRKY65, ATWRKY65 | WRKY DNA-binding protein 65 | chr1:10236589-10237467 FORWARD LENGTH=259
	IRGSP	Os01t0750100-03	Similar to WRKY13 transcription factor.
	nr	ref|XP_002269267.1|	PREDICTED: probable WRKY transcription factor 65 [Vitis vinifera] gi|297740534|emb|CBI30716.3| unnamed protein product [Vitis vinifera]
CL5279.Contig3_F1_Bulb	TAIR	AT1G29280.1	| Symbols: WRKY65, ATWRKY65 | WRKY DNA-binding protein 65 | chr1:10236589-10237467 FORWARD LENGTH=259
	IRGSP	Os01t0750100-03	Similar to WRKY13 transcription factor.
	nr	ref|XP_002269267.1|	PREDICTED: probable WRKY transcription factor 65 [Vitis vinifera] gi|297740534|emb|CBI30716.3| unnamed protein product [Vitis vinifera]
CL5279.Contig4_F1_Bulb	TAIR	AT1G29280.1	| Symbols: WRKY65, ATWRKY65 | WRKY DNA-binding protein 65 | chr1:10236589-10237467 FORWARD LENGTH=259
	IRGSP	Os01t0750100-03	Similar to WRKY13 transcription factor.
	nr	ref|XP_002269267.1|	PREDICTED: probable WRKY transcription factor 65 [Vitis vinifera] gi|297740534|emb|CBI30716.3| unnamed protein product [Vitis vinifera]
CL5280.Contig1_F1_Bulb	TAIR	AT3G56400.1	| Symbols: WRKY70, ATWRKY70 | WRKY DNA-binding protein 70 | chr3:20909082-20910409 REVERSE LENGTH=294
	IRGSP	Os05t0478400-00	Similar to WRKY transcription factor 48.
	nr	gb|EOA24116.1|	hypothetical protein CARUB_v10017349mg, partial [Capsella rubella]
CL5280.Contig2_F1_Bulb	TAIR	AT3G56400.1	| Symbols: WRKY70, ATWRKY70 | WRKY DNA-binding protein 70 | chr3:20909082-20910409 REVERSE LENGTH=294
	IRGSP	Os03t0335200-01	Similar to WRKY1 (WRKY transcription factor 17).
	nr	gb|EOY04438.1|	WRKY DNA-binding protein 70, putative isoform 1 [Theobroma cacao]
CL5293.Contig1_F1_Bulb	TAIR	AT3G56400.1	| Symbols: WRKY70, ATWRKY70 | WRKY DNA-binding protein 70 | chr3:20909082-20910409 REVERSE LENGTH=294
	IRGSP	Os11t0116900-01	Similar to WRKY DNA binding domain containing protein, expressed.
	nr	ref|NP_001065590.1|	Os11g0116900 [Oryza sativa Japonica Group] gi|113644294|dbj|BAF27435.1| Os11g0116900, partial [Oryza sativa Japonica Group]
CL5293.Contig2_F1_Bulb	TAIR	--No_Hits--
	IRGSP	Os11t0116900-01	Similar to WRKY DNA binding domain containing protein, expressed.
	nr	--No_Hits--
CL5828.Contig1_F1_Bulb	TAIR	AT5G60190.1	| Symbols: | Cysteine proteinases superfamily protein | chr5:24235319-24235999 FORWARD LENGTH=226
	IRGSP	Os12t0102350-01	Similar to WRKY transcription factor 57.
	nr	ref|XP_002520624.1|	sentrin/sumo-specific protease, senp8, putative [Ricinus communis] gi|223540185|gb|EEF41760.1| sentrin/sumo-specific protease, senp8, putative [Ricinus communis]
CL5901.Contig1_F1_Bulb	TAIR	AT2G34830.1	| Symbols: WRKY35, MEE24, AtWRKY35 | WRKY DNA-binding protein 35 | chr2:14693839-14696378 REVERSE LENGTH=427
	IRGSP	Os04t0597300-01	Similar to WERKY protein (Fragment).
	nr	emb|CBI31090.3|	unnamed protein product [Vitis vinifera]
CL7046.Contig1_F1_Bulb	TAIR	AT5G56270.1	| Symbols: WRKY2, ATWRKY2 | WRKY DNA-binding protein 2 | chr5:22780816-22783137 FORWARD LENGTH=687
	IRGSP	Os09t0481700-02	SUSIBA2-like (WRKY transcription factor 80).
	nr	emb|CBI39865.3|	unnamed protein product [Vitis vinifera]
Unigene10786_F1_Bulb	TAIR	AT4G30935.1	| Symbols: WRKY32, ATWRKY32 | WRKY DNA-binding protein 32 | chr4:15051916-15053908 REVERSE LENGTH=466
	IRGSP	Os09t0481700-02	SUSIBA2-like (WRKY transcription factor 80).
	nr	ref|XP_003571606.1|	PREDICTED: probable WRKY transcription factor 4-like [Brachypodium distachyon]
Unigene12295_F1_Bulb	TAIR	AT1G13960.1	| Symbols: WRKY4 | WRKY DNA-binding protein 4 | chr1:4776622-4779043 FORWARD LENGTH=514
	IRGSP	Os08t0276200-01	Similar to WRKY transcription factor 44 (WRKY DNA-binding protein 44) (TRANSPARENT TESTA GLABRA 2).
	nr	ref|XP_002445412.1|	hypothetical protein SORBIDRAFT_07g016330 [Sorghum bicolor] gi|241941762|gb|EES14907.1| hypothetical protein SORBIDRAFT_07g016330 [Sorghum bicolor]
Unigene16306_F1_Bulb	TAIR	AT1G30650.1	| Symbols: WRKY14, ATWRKY14, AR411 | WRKY DNA-binding protein 14 | chr1:10868612-10870973 FORWARD LENGTH=430
	IRGSP	Os02t0265200-01	WRKY transcription factor 39.
	nr	ref|XP_004492798.1|	PREDICTED: WRKY transcription factor 22-like [Cicer arietinum]
Unigene16394_F1_Bulb	TAIR	AT5G15130.1	| Symbols: WRKY72, ATWRKY72 | WRKY DNA-binding protein 72 | chr5:4904426-4906879 FORWARD LENGTH=548
	IRGSP	Os01t0185900-01	Similar to WRKY 1 (Fragment).
	nr	ref|NP_001234802.1|	transcription factor WRKY72 [Solanum lycopersicum] gi|300498294|gb|ADK23849.1| WRKY72 [Solanum lycopersicum]
Unigene18340_F1_Bulb	TAIR	AT5G56270.1	| Symbols: WRKY2, ATWRKY2 | WRKY DNA-binding protein 2 | chr5:22780816-22783137 FORWARD LENGTH=687
	IRGSP	Os04t0471700-00	Similar to WRKY10 (WRKY transcription factor 35).
	nr	gb|AER70305.1|	WRKY transcription factor [(Populus tomentosa x P. bolleana) x P. tomentosa]
Unigene21287_F1_Bulb	TAIR	AT3G04670.1	| Symbols: WRKY39, ATWRKY39 | WRKY DNA-binding protein 39 | chr3:1266530-1267691 REVERSE LENGTH=330
	IRGSP	Os12t0597700-01	Similar to WRKY2 (Fragment).
	nr	ref|XP_002520995.1|	WRKY transcription factor, putative [Ricinus communis] gi|223539832|gb|EEF41412.1| WRKY transcription factor, putative [Ricinus communis]
Unigene21782_F1_Bulb	TAIR	AT2G38470.1	| Symbols: WRKY33, ATWRKY33 | WRKY DNA-binding protein 33 | chr2:16108476-16110539 FORWARD LENGTH=519
	IRGSP	Os05t0343400-01	WRKY transcription factor 53 (Transcription factor WRKY12).
	nr	gb|AAC31956.1|	zinc finger protein [Pimpinella brachycarpa]
Unigene21783_F1_Bulb	TAIR	AT2G38470.1	| Symbols: WRKY33, ATWRKY33 | WRKY DNA-binding protein 33 | chr2:16108476-16110539 FORWARD LENGTH=519
	IRGSP	Os01t0826400-01	WRKY transcription factor 24 (WRKY24).
	nr	gb|EOY34631.1|	WRKY DNA-binding protein 33 isoform 1 [Theobroma cacao]
Unigene22045_F1_Bulb	TAIR	AT4G11070.2	| Symbols: WRKY41, AtWRKY41 | WRKY family transcription factor | chr4:6759303-6760763 FORWARD LENGTH=281
	IRGSP	Os09t0334500-01	WRKY transcription factor 74.
	nr	gb|EOY23457.1|	WRKY DNA-binding protein 30, putative [Theobroma cacao]
Unigene220_F1_Bulb	TAIR	AT5G64810.1	| Symbols: WRKY51, ATWRKY51 | WRKY DNA-binding protein 51 | chr5:25908415-25909687 FORWARD LENGTH=194
	IRGSP	Os05t0537100-00	WRKY transcription factor 10.
	nr	ref|XP_002440147.1|	hypothetical protein SORBIDRAFT_09g026830 [Sorghum bicolor] gi|241945432|gb|EES18577.1| hypothetical protein SORBIDRAFT_09g026830 [Sorghum bicolor]
Unigene22742_F1_Bulb	TAIR	AT2G38470.1	| Symbols: WRKY33, ATWRKY33 | WRKY DNA-binding protein 33 | chr2:16108476-16110539 FORWARD LENGTH=519
	IRGSP	Os05t0343400-01	WRKY transcription factor 53 (Transcription factor WRKY12).
	nr	dbj|BAI63296.1|	double WRKY type transfactor [Nicotiana benthamiana]
Unigene23569_F1_Bulb	TAIR	AT5G07100.1	| Symbols: WRKY26 | WRKY DNA-binding protein 26 | chr5:2204313-2205647 FORWARD LENGTH=309
	IRGSP	Os12t0507300-00	Similar to WRKY DNA binding domain containing protein, expressed.
	nr	ref|XP_002323445.1|	predicted protein [Populus trichocarpa] gi|222868075|gb|EEF05206.1| predicted protein [Populus trichocarpa]
Unigene23949_F1_Bulb	TAIR	AT4G31550.2	| Symbols: WRKY11, ATWRKY11 | WRKY DNA-binding protein 11 | chr4:15290065-15291458 REVERSE LENGTH=324
	IRGSP	Os04t0287400-01	Similar to WRKY transcription factor 51.
	nr	emb|CBI17876.3|	unnamed protein product [Vitis vinifera]
Unigene26752_F1_Bulb	TAIR	AT3G56400.1	| Symbols: WRKY70, ATWRKY70 | WRKY DNA-binding protein 70 | chr3:20909082-20910409 REVERSE LENGTH=294
	IRGSP	Os05t0322900-01	Similar to WRKY transcription factor 45.
	nr	ref|XP_003566383.1|	PREDICTED: uncharacterized protein LOC100836752 [Brachypodium distachyon]
Unigene26855_F1_Bulb	TAIR	AT1G80840.1	| Symbols: WRKY40, ATWRKY40 | WRKY DNA-binding protein 40 | chr1:30383834-30385356 FORWARD LENGTH=302
	IRGSP	Os06t0649000-02	Similar to WRKY transcription factor 28.
	nr	gb|ADU02585.1|	WRKY transcription factor 4 [Vitis vinifera]
Unigene27066_F1_Bulb	TAIR	AT4G26640.2	| Symbols: WRKY20, AtWRKY20 | WRKY family transcription factor family protein | chr4:13437298-13440693 REVERSE LENGTH=557
	IRGSP	Os07t0583700-01	WRKY transcription factor 78.
	nr	gb|EAZ04490.1|	hypothetical protein OsI_26641 [Oryza sativa Indica Group]
Unigene27278_F1_Bulb	TAIR	AT5G49520.1	| Symbols: WRKY48, ATWRKY48 | WRKY DNA-binding protein 48 | chr5:20090890-20092867 FORWARD LENGTH=399
	IRGSP	Os05t0565900-00	DNA-binding WRKY domain containing protein.
	nr	ref|XP_004151189.1|	PREDICTED: probable WRKY transcription factor 48-like [Cucumis sativus] gi|449524182|ref|XP_004169102.1| PREDICTED: probable WRKY transcription factor 48-like [Cucumis sativus]
Unigene29125_F1_Bulb	TAIR	AT5G56270.1	| Symbols: WRKY2, ATWRKY2 | WRKY DNA-binding protein 2 | chr5:22780816-22783137 FORWARD LENGTH=687
	IRGSP	Os08t0499300-01	WRKY transcription factor 30.
	nr	ref|XP_003522837.1|	PREDICTED: probable WRKY transcription factor 2-like [Glycine max]
Unigene31375_F1_Bulb	TAIR	AT5G56270.1	| Symbols: WRKY2, ATWRKY2 | WRKY DNA-binding protein 2 | chr5:22780816-22783137 FORWARD LENGTH=687
	IRGSP	Os01t0826400-01	WRKY transcription factor 24 (WRKY24).
	nr	ref|XP_002444812.1|	hypothetical protein SORBIDRAFT_07g028430 [Sorghum bicolor] gi|241941162|gb|EES14307.1| hypothetical protein SORBIDRAFT_07g028430 [Sorghum bicolor]
Unigene31672_F1_Bulb	TAIR	AT1G04640.2	| Symbols: LIP2 | lipoyltransferase 2 | chr1:1292541-1293248 FORWARD LENGTH=235
	IRGSP	Os03t0321800-02	Similar to WRKY transcription factor 55.
	nr	gb|EOA38434.1|	hypothetical protein CARUB_v10010053mg, partial [Capsella rubella]
Unigene32392_F1_Bulb	TAIR	AT5G56270.1	| Symbols: WRKY2, ATWRKY2 | WRKY DNA-binding protein 2 | chr5:22780816-22783137 FORWARD LENGTH=687
	IRGSP	Os04t0471700-00	Similar to WRKY10 (WRKY transcription factor 35).
	nr	ref|XP_003579949.1|	PREDICTED: probable WRKY transcription factor 2-like [Brachypodium distachyon]
Unigene33135_F1_Bulb	TAIR	AT4G39410.1	| Symbols: WRKY13, ATWRKY13 | WRKY DNA-binding protein 13 | chr4:18332937-18334789 REVERSE LENGTH=304
	IRGSP	Os01t0182700-01	Similar to WRKY12.
	nr	ref|XP_004288129.1|	PREDICTED: probable WRKY transcription factor 13-like [Fragaria vesca subsp. vesca]
Unigene33594_F1_Bulb	TAIR	AT5G56270.1	| Symbols: WRKY2, ATWRKY2 | WRKY DNA-binding protein 2 | chr5:22780816-22783137 FORWARD LENGTH=687
	IRGSP	Os09t0481700-02	SUSIBA2-like (WRKY transcription factor 80).
	nr	ref|XP_002529203.1|	conserved hypothetical protein [Ricinus communis] gi|223531321|gb|EEF33159.1| conserved hypothetical protein [Ricinus communis]
Unigene35027_F1_Bulb	TAIR	AT4G39410.1	| Symbols: WRKY13, ATWRKY13 | WRKY DNA-binding protein 13 | chr4:18332937-18334789 REVERSE LENGTH=304
	IRGSP	Os01t0182700-01	Similar to WRKY12.
	nr	ref|NP_001042221.1|	Os01g0182700 [Oryza sativa Japonica Group] gi|113531752|dbj|BAF04135.1| Os01g0182700 [Oryza sativa Japonica Group]
Unigene386_F1_Bulb	TAIR	AT3G29185.1	| Symbols: | Domain of unknown function (DUF3598) | chr3:11155092-11157207 REVERSE LENGTH=396
	IRGSP	Os03t0758900-01	Similar to predicted protein.
	nr	gb|AEO31475.1|	WRKY transcription factor 11-2 [Dimocarpus longan]
Unigene38910_F1_Bulb	TAIR	AT1G62300.1	| Symbols: WRKY6, ATWRKY6 | WRKY family transcription factor | chr1:23016887-23019155 REVERSE LENGTH=553
	IRGSP	Os01t0246700-01	Similar to WRKY transcription factor 1.
	nr	ref|XP_002269696.2|	PREDICTED: WRKY transcription factor 6-like [Vitis vinifera]
Unigene39299_F1_Bulb	TAIR	AT2G03340.1	| Symbols: WRKY3 | WRKY DNA-binding protein 3 | chr2:1014724-1016936 REVERSE LENGTH=513
	IRGSP	Os04t0471700-00	Similar to WRKY10 (WRKY transcription factor 35).
	nr	ref|XP_003522837.1|	PREDICTED: probable WRKY transcription factor 2-like [Glycine max]
Unigene39465_F1_Bulb	TAIR	AT4G26640.2	| Symbols: WRKY20, AtWRKY20 | WRKY family transcription factor family protein | chr4:13437298-13440693 REVERSE LENGTH=557
	IRGSP	Os07t0583700-01	WRKY transcription factor 78.
	nr	gb|AEQ29020.1|	WRKY7 [Panax quinquefolius]
Unigene44569_F1_Bulb	TAIR	AT2G44745.1	| Symbols: | WRKY family transcription factor | chr2:18447482-18449004 REVERSE LENGTH=218
	IRGSP	Os04t0545000-01	Similar to WRKY transcription factor 34.
	nr	ref|XP_003529027.1|	PREDICTED: probable WRKY transcription factor 12-like [Glycine max]
Unigene47498_F1_Bulb	TAIR	AT1G04640.2	| Symbols: LIP2 | lipoyltransferase 2 | chr1:1292541-1293248 FORWARD LENGTH=235
	IRGSP	Os03t0321800-02	Similar to WRKY transcription factor 55.
	nr	ref|XP_002297668.1|	predicted protein [Populus trichocarpa] gi|222844926|gb|EEE82473.1| predicted protein [Populus trichocarpa]
Unigene4967_F1_Bulb	TAIR	AT5G64810.1	| Symbols: WRKY51, ATWRKY51 | WRKY DNA-binding protein 51 | chr5:25908415-25909687 FORWARD LENGTH=194
	IRGSP	Os05t0537100-00	WRKY transcription factor 10.
	nr	gb|ADF42578.1|	putative pathogenesis protein [Phyllostachys edulis]
Unigene50457_F1_Bulb	TAIR	AT5G43290.1	| Symbols: WRKY49, ATWRKY49 | WRKY DNA-binding protein 49 | chr5:17371987-17373083 REVERSE LENGTH=274
	IRGSP	Os01t0972800-01	WRKY1 (WRKY transcription factor 17).
	nr	gb|EMJ07726.1|	hypothetical protein PRUPE_ppa019550mg [Prunus persica]
Unigene5166_F1_Bulb	TAIR	AT1G04640.2	| Symbols: LIP2 | lipoyltransferase 2 | chr1:1292541-1293248 FORWARD LENGTH=235
	IRGSP	Os03t0321800-02	Similar to WRKY transcription factor 55.
	nr	ref|XP_002525976.1|	lipoate-protein ligase B, putative [Ricinus communis] gi|223534708|gb|EEF36400.1| lipoate-protein ligase B, putative [Ricinus communis]
Unigene6479_F1_Bulb	TAIR	--No_Hits--
	IRGSP	--No_Hits--
	nr	ref|XP_003519273.1|	PREDICTED: probable WRKY transcription factor 33 [Glycine max]
Unigene7010_F1_Bulb	TAIR	AT5G52830.1	| Symbols: WRKY27, ATWRKY27 | WRKY DNA-binding protein 27 | chr5:21410996-21412218 FORWARD LENGTH=348
	IRGSP	Os02t0265200-01	WRKY transcription factor 39.
	nr	ref|NP_001237508.1|	transcription factor [Glycine max] gi|166203223|gb|ABY84652.1| transcription factor [Glycine max]
Unigene7236_F1_Bulb	TAIR	AT5G13080.1	| Symbols: WRKY75, ATWRKY75 | WRKY DNA-binding protein 75 | chr5:4149928-4151019 REVERSE LENGTH=145
	IRGSP	Os11t0490900-01	Similar to WRKY transcription factor 72.
	nr	tpg|DAA41982.1|	TPA: putative WRKY DNA-binding domain superfamily protein [Zea mays]
Unigene8474_F1_Bulb	TAIR	--No_Hits--
	IRGSP	Os12t0116700-01	Similar to WRKY transcription factor 64.
	nr	--No_Hits--
Unigene8739_F1_Bulb	TAIR	AT5G24110.1	| Symbols: WRKY30, ATWRKY30 | WRKY DNA-binding protein 30 | chr5:8153416-8154633 REVERSE LENGTH=303
	IRGSP	Os01t0656400-00	Similar to WRKY transcription factor 15.
	nr	gb|EOY23457.1|	WRKY DNA-binding protein 30, putative [Theobroma cacao]
Unigene9383_F1_Bulb	TAIR	AT4G22070.1	| Symbols: WRKY31, ATWRKY31 | WRKY DNA-binding protein 31 | chr4:11691381-11694234 REVERSE LENGTH=538
	IRGSP	Os05t0137500-00	Similar to WRKY transcription factor 5.
	nr	ref|XP_002524838.1|	WRKY transcription factor, putative [Ricinus communis] gi|223535898|gb|EEF37558.1| WRKY transcription factor, putative [Ricinus communis]
CL1321.Contig1_A.roylei_Bulb	TAIR	AT3G56400.1	| Symbols: WRKY70, ATWRKY70 | WRKY DNA-binding protein 70 | chr3:20909082-20910409 REVERSE LENGTH=294
	IRGSP	Os05t0322900-01	Similar to WRKY transcription factor 45.
	nr	ref|XP_003566383.1|	PREDICTED: uncharacterized protein LOC100836752 [Brachypodium distachyon]
CL1321.Contig2_A.roylei_Bulb	TAIR	AT3G56400.1	| Symbols: WRKY70, ATWRKY70 | WRKY DNA-binding protein 70 | chr3:20909082-20910409 REVERSE LENGTH=294
	IRGSP	Os07t0680400-01	DNA-binding WRKY domain containing protein.
	nr	gb|EMT19878.1|	Putative WRKY transcription factor 70 [Aegilops tauschii]
CL1801.Contig1_A.roylei_Bulb	TAIR	AT4G11070.2	| Symbols: WRKY41, AtWRKY41 | WRKY family transcription factor | chr4:6759303-6760763 FORWARD LENGTH=281
	IRGSP	Os08t0386200-01	WRKY transcription factor 69.
	nr	gb|EMJ10550.1|	hypothetical protein PRUPE_ppa008573mg [Prunus persica]
CL3318.Contig1_A.roylei_Bulb	TAIR	AT5G56270.1	| Symbols: WRKY2, ATWRKY2 | WRKY DNA-binding protein 2 | chr5:22780816-22783137 FORWARD LENGTH=687
	IRGSP	Os08t0499300-01	WRKY transcription factor 30.
	nr	ref|XP_003522837.1|	PREDICTED: probable WRKY transcription factor 2-like [Glycine max]
CL4550.Contig1_A.roylei_Bulb	TAIR	AT2G38470.1	| Symbols: WRKY33, ATWRKY33 | WRKY DNA-binding protein 33 | chr2:16108476-16110539 FORWARD LENGTH=519
	IRGSP	Os01t0826400-01	WRKY transcription factor 24 (WRKY24).
	nr	gb|EOY34631.1|	WRKY DNA-binding protein 33 isoform 1 [Theobroma cacao]
CL4550.Contig2_A.roylei_Bulb	TAIR	AT2G38470.1	| Symbols: WRKY33, ATWRKY33 | WRKY DNA-binding protein 33 | chr2:16108476-16110539 FORWARD LENGTH=519
	IRGSP	Os01t0826400-01	WRKY transcription factor 24 (WRKY24).
	nr	gb|EOY34631.1|	WRKY DNA-binding protein 33 isoform 1 [Theobroma cacao]
CL4550.Contig3_A.roylei_Bulb	TAIR	AT2G38470.1	| Symbols: WRKY33, ATWRKY33 | WRKY DNA-binding protein 33 | chr2:16108476-16110539 FORWARD LENGTH=519
	IRGSP	Os01t0826400-01	WRKY transcription factor 24 (WRKY24).
	nr	gb|AAC31956.1|	zinc finger protein [Pimpinella brachycarpa]
CL4550.Contig4_A.roylei_Bulb	TAIR	AT2G38470.1	| Symbols: WRKY33, ATWRKY33 | WRKY DNA-binding protein 33 | chr2:16108476-16110539 FORWARD LENGTH=519
	IRGSP	Os01t0826400-01	WRKY transcription factor 24 (WRKY24).
	nr	emb|CBI15865.3|	unnamed protein product [Vitis vinifera]
CL5543.Contig1_A.roylei_Bulb	TAIR	AT3G56400.1	| Symbols: WRKY70, ATWRKY70 | WRKY DNA-binding protein 70 | chr3:20909082-20910409 REVERSE LENGTH=294
	IRGSP	Os05t0478700-00	Hypothetical conserved gene.
	nr	ref|XP_002456546.1|	hypothetical protein SORBIDRAFT_03g038170 [Sorghum bicolor] gi|241928521|gb|EES01666.1| hypothetical protein SORBIDRAFT_03g038170 [Sorghum bicolor]
CL5543.Contig2_A.roylei_Bulb	TAIR	--No_Hits--
	IRGSP	Os01t0820400-00	Similar to WRKY22 - superfamily of TFs having WRKY and zinc finger domains.
	nr	gb|EAZ13963.1|	hypothetical protein OsJ_03890 [Oryza sativa Japonica Group]
CL5550.Contig1_A.roylei_Bulb	TAIR	AT1G80840.1	| Symbols: WRKY40, ATWRKY40 | WRKY DNA-binding protein 40 | chr1:30383834-30385356 FORWARD LENGTH=302
	IRGSP	Os06t0649000-02	Similar to WRKY transcription factor 28.
	nr	gb|ADU02585.1|	WRKY transcription factor 4 [Vitis vinifera]
CL5550.Contig2_A.roylei_Bulb	TAIR	AT1G80840.1	| Symbols: WRKY40, ATWRKY40 | WRKY DNA-binding protein 40 | chr1:30383834-30385356 FORWARD LENGTH=302
	IRGSP	Os06t0649000-02	Similar to WRKY transcription factor 28.
	nr	gb|ADU02585.1|	WRKY transcription factor 4 [Vitis vinifera]
CL7556.Contig1_A.roylei_Bulb	TAIR	AT5G56270.1	| Symbols: WRKY2, ATWRKY2 | WRKY DNA-binding protein 2 | chr5:22780816-22783137 FORWARD LENGTH=687
	IRGSP	Os09t0481700-02	SUSIBA2-like (WRKY transcription factor 80).
	nr	ref|XP_002529203.1|	conserved hypothetical protein [Ricinus communis] gi|223531321|gb|EEF33159.1| conserved hypothetical protein [Ricinus communis]
CL7854.Contig1_A.roylei_Bulb	TAIR	AT4G26640.2	| Symbols: WRKY20, AtWRKY20 | WRKY family transcription factor family protein | chr4:13437298-13440693 REVERSE LENGTH=557
	IRGSP	Os07t0583700-01	WRKY transcription factor 78.
	nr	gb|EAZ04490.1|	hypothetical protein OsI_26641 [Oryza sativa Indica Group]
CL7854.Contig2_A.roylei_Bulb	TAIR	AT4G26640.2	| Symbols: WRKY20, AtWRKY20 | WRKY family transcription factor family protein | chr4:13437298-13440693 REVERSE LENGTH=557
	IRGSP	Os07t0583700-01	WRKY transcription factor 78.
	nr	gb|EAZ04490.1|	hypothetical protein OsI_26641 [Oryza sativa Indica Group]
Unigene10166_A.roylei_Bulb	TAIR	--No_Hits--
	IRGSP	Os05t0343400-01	WRKY transcription factor 53 (Transcription factor WRKY12).
	nr	ref|XP_004490681.1|	PREDICTED: probable WRKY transcription factor 33-like [Cicer arietinum]
Unigene15561_A.roylei_Bulb	TAIR	AT2G30590.1	| Symbols: WRKY21 | WRKY DNA-binding protein 21 | chr2:13033891-13035303 FORWARD LENGTH=380
	IRGSP	Os12t0597700-02	Similar to WRKY DNA binding domain containing protein, expressed.
	nr	ref|NP_001067197.1|	Os12g0597700 [Oryza sativa Japonica Group] gi|77556448|gb|ABA99244.1| WRKY DNA binding domain containing protein, expressed [Oryza sativa Japonica Group] gi|113649704|dbj|BAF30216.1| Os12g0597700 [Oryza sativa Japonica Group]
Unigene18755_A.roylei_Bulb	TAIR	AT1G04640.2	| Symbols: LIP2 | lipoyltransferase 2 | chr1:1292541-1293248 FORWARD LENGTH=235
	IRGSP	Os03t0321800-02	Similar to WRKY transcription factor 55.
	nr	ref|XP_003555295.1|	PREDICTED: octanoyltransferase-like [Glycine max]
Unigene19601_A.roylei_Bulb	TAIR	AT4G26640.2	| Symbols: WRKY20, AtWRKY20 | WRKY family transcription factor family protein | chr4:13437298-13440693 REVERSE LENGTH=557
	IRGSP	Os07t0583700-01	WRKY transcription factor 78.
	nr	dbj|BAB61056.1|	WRKY DNA-binding protein [Nicotiana tabacum]
Unigene21402_A.roylei_Bulb	TAIR	AT1G13960.1	| Symbols: WRKY4 | WRKY DNA-binding protein 4 | chr1:4776622-4779043 FORWARD LENGTH=514
	IRGSP	Os12t0507300-00	Similar to WRKY DNA binding domain containing protein, expressed.
	nr	gb|AAT46067.1|	DNA binding protein WRKY2 [Vitis vinifera]
Unigene22219_A.roylei_Bulb	TAIR	AT2G34830.1	| Symbols: WRKY35, MEE24, AtWRKY35 | WRKY DNA-binding protein 35 | chr2:14693839-14696378 REVERSE LENGTH=427
	IRGSP	Os04t0597300-01	Similar to WERKY protein (Fragment).
	nr	ref|XP_004231651.1|	PREDICTED: LOW QUALITY PROTEIN: probable WRKY transcription factor 35-like [Solanum lycopersicum]
Unigene24045_A.roylei_Bulb	TAIR	AT3G56400.1	| Symbols: WRKY70, ATWRKY70 | WRKY DNA-binding protein 70 | chr3:20909082-20910409 REVERSE LENGTH=294
	IRGSP	Os12t0116400-00	Similar to WRKY DNA binding domain containing protein, expressed.
	nr	gb|ABA95637.1|	WRKY DNA binding domain containing protein, expressed [Oryza sativa Japonica Group] gi|125578298|gb|EAZ19444.1| hypothetical protein OsJ_35006 [Oryza sativa Japonica Group]
Unigene24300_A.roylei_Bulb	TAIR	AT5G56270.1	| Symbols: WRKY2, ATWRKY2 | WRKY DNA-binding protein 2 | chr5:22780816-22783137 FORWARD LENGTH=687
	IRGSP	Os04t0471700-00	Similar to WRKY10 (WRKY transcription factor 35).
	nr	gb|ADL36865.1|	WRKY domain class transcription factor [Malus x domestica]
Unigene24301_A.roylei_Bulb	TAIR	AT5G56270.1	| Symbols: WRKY2, ATWRKY2 | WRKY DNA-binding protein 2 | chr5:22780816-22783137 FORWARD LENGTH=687
	IRGSP	Os04t0471700-00	Similar to WRKY10 (WRKY transcription factor 35).
	nr	gb|AFW58561.1|	putative WRKY DNA-binding domain superfamily protein [Zea mays]
Unigene2595_A.roylei_Bulb	TAIR	AT4G11070.2	| Symbols: WRKY41, AtWRKY41 | WRKY family transcription factor | chr4:6759303-6760763 FORWARD LENGTH=281
	IRGSP	Os09t0334500-01	WRKY transcription factor 74.
	nr	gb|EMJ19434.1|	hypothetical protein PRUPE_ppa007986mg [Prunus persica]
Unigene29097_A.roylei_Bulb	TAIR	AT3G04670.2	| Symbols: WRKY39, ATWRKY39 | WRKY DNA-binding protein 39 | chr3:1266737-1267691 REVERSE LENGTH=290
	IRGSP	Os03t0741400-01	Similar to SUSIBA2.
	nr	gb|AAL75474.1|	DNA binding protein [Elaeis oleifera]
Unigene30653_A.roylei_Bulb	TAIR	AT1G13960.2	| Symbols: WRKY4 | WRKY DNA-binding protein 4 | chr1:4776622-4779043 FORWARD LENGTH=487
	IRGSP	Os08t0499300-01	WRKY transcription factor 30.
	nr	ref|XP_003571606.1|	PREDICTED: probable WRKY transcription factor 4-like [Brachypodium distachyon]
Unigene30716_A.roylei_Bulb	TAIR	AT1G29280.1	| Symbols: WRKY65, ATWRKY65 | WRKY DNA-binding protein 65 | chr1:10236589-10237467 FORWARD LENGTH=259
	IRGSP	Os01t0750100-03	Similar to WRKY13 transcription factor.
	nr	ref|XP_002269267.1|	PREDICTED: probable WRKY transcription factor 65 [Vitis vinifera] gi|297740534|emb|CBI30716.3| unnamed protein product [Vitis vinifera]
Unigene30995_A.roylei_Bulb	TAIR	AT5G07100.2	| Symbols: WRKY26 | WRKY DNA-binding protein 26 | chr5:2204813-2205647 FORWARD LENGTH=216
	IRGSP	Os12t0507300-00	Similar to WRKY DNA binding domain containing protein, expressed.
	nr	ref|XP_002323445.1|	predicted protein [Populus trichocarpa] gi|222868075|gb|EEF05206.1| predicted protein [Populus trichocarpa]
Unigene32418_A.roylei_Bulb	TAIR	AT5G56270.1	| Symbols: WRKY2, ATWRKY2 | WRKY DNA-binding protein 2 | chr5:22780816-22783137 FORWARD LENGTH=687
	IRGSP	Os04t0471700-00	Similar to WRKY10 (WRKY transcription factor 35).
	nr	ref|XP_003579949.1|	PREDICTED: probable WRKY transcription factor 2-like [Brachypodium distachyon]
Unigene34108_A.roylei_Bulb	TAIR	AT4G39410.1	| Symbols: WRKY13, ATWRKY13 | WRKY DNA-binding protein 13 | chr4:18332937-18334789 REVERSE LENGTH=304
	IRGSP	Os01t0182700-01	Similar to WRKY12.
	nr	ref|XP_004237476.1|	PREDICTED: uncharacterized protein LOC101261017 [Solanum lycopersicum]
Unigene38102_A.roylei_Bulb	TAIR	AT5G56270.1	| Symbols: WRKY2, ATWRKY2 | WRKY DNA-binding protein 2 | chr5:22780816-22783137 FORWARD LENGTH=687
	IRGSP	Os01t0826400-01	WRKY transcription factor 24 (WRKY24).
	nr	ref|XP_002444812.1|	hypothetical protein SORBIDRAFT_07g028430 [Sorghum bicolor] gi|241941162|gb|EES14307.1| hypothetical protein SORBIDRAFT_07g028430 [Sorghum bicolor]
Unigene40494_A.roylei_Bulb	TAIR	AT1G80840.1	| Symbols: WRKY40, ATWRKY40 | WRKY DNA-binding protein 40 | chr1:30383834-30385356 FORWARD LENGTH=302
	IRGSP	--No_Hits--
	nr	ref|XP_003530266.1|	PREDICTED: probable WRKY transcription factor 40-like isoform 2 [Glycine max]
Unigene40742_A.roylei_Bulb	TAIR	AT5G56270.1	| Symbols: WRKY2, ATWRKY2 | WRKY DNA-binding protein 2 | chr5:22780816-22783137 FORWARD LENGTH=687
	IRGSP	Os01t0826400-01	WRKY transcription factor 24 (WRKY24).
	nr	gb|EOY11828.1|	WRKY DNA-binding protein 2 isoform 3 [Theobroma cacao] gi|508719932|gb|EOY11829.1| WRKY DNA-binding protein 2 isoform 3 [Theobroma cacao]
Unigene4604_A.roylei_Bulb	TAIR	AT1G28280.2	| Symbols: | VQ motif-containing protein | chr1:9886297-9887395 REVERSE LENGTH=243
	IRGSP	Os01t0201250-00	Similar to DNA-binding WRKY.
	nr	ref|XP_004244236.1|	PREDICTED: uncharacterized protein LOC101257285 [Solanum lycopersicum]
Unigene4992_A.roylei_Bulb	TAIR	AT5G07100.1	| Symbols: WRKY26 | WRKY DNA-binding protein 26 | chr5:2204313-2205647 FORWARD LENGTH=309
	IRGSP	Os05t0343400-01	WRKY transcription factor 53 (Transcription factor WRKY12).
	nr	dbj|BAI63294.1|	double WRKY type transfactor [Solanum tuberosum]
Unigene6204_A.roylei_Bulb	TAIR	AT4G31550.2	| Symbols: WRKY11, ATWRKY11 | WRKY DNA-binding protein 11 | chr4:15290065-15291458 REVERSE LENGTH=324
	IRGSP	Os04t0287400-01	Similar to WRKY transcription factor 51.
	nr	emb|CBI17876.3|	unnamed protein product [Vitis vinifera]
Unigene7170_A.roylei_Bulb	TAIR	AT5G49520.1	| Symbols: WRKY48, ATWRKY48 | WRKY DNA-binding protein 48 | chr5:20090890-20092867 FORWARD LENGTH=399
	IRGSP	Os05t0565900-00	DNA-binding WRKY domain containing protein.
	nr	ref|XP_002279385.1|	PREDICTED: probable WRKY transcription factor 48 [Vitis vinifera] gi|296083226|emb|CBI22862.3| unnamed protein product [Vitis vinifera]
Unigene7554_A.roylei_Bulb	TAIR	AT1G04640.2	| Symbols: LIP2 | lipoyltransferase 2 | chr1:1292541-1293248 FORWARD LENGTH=235
	IRGSP	Os03t0321800-02	Similar to WRKY transcription factor 55.
	nr	ref|XP_002525976.1|	lipoate-protein ligase B, putative [Ricinus communis] gi|223534708|gb|EEF36400.1| lipoate-protein ligase B, putative [Ricinus communis]
Unigene7582_A.roylei_Bulb	TAIR	AT2G44745.1	| Symbols: | WRKY family transcription factor | chr2:18447482-18449004 REVERSE LENGTH=218
	IRGSP	Os04t0545000-01	Similar to WRKY transcription factor 34.
	nr	gb|AEQ29015.1|	WRKY2, partial [Panax quinquefolius]
CL1424.Contig1_DHA_Root	TAIR	AT2G38470.1	| Symbols: WRKY33, ATWRKY33 | WRKY DNA-binding protein 33 | chr2:16108476-16110539 FORWARD LENGTH=519
	IRGSP	Os01t0826400-01	WRKY transcription factor 24 (WRKY24).
	nr	gb|EOY34631.1|	WRKY DNA-binding protein 33 isoform 1 [Theobroma cacao]
CL19.Contig1_DHA_Root	TAIR	AT2G40750.1	| Symbols: WRKY54, ATWRKY54 | WRKY DNA-binding protein 54 | chr2:17000636-17002354 REVERSE LENGTH=346
	IRGSP	Os03t0335200-01	Similar to WRKY1 (WRKY transcription factor 17).
	nr	gb|EOY04438.1|	WRKY DNA-binding protein 70, putative isoform 1 [Theobroma cacao]
CL1930.Contig1_DHA_Root	TAIR	AT5G56270.1	| Symbols: WRKY2, ATWRKY2 | WRKY DNA-binding protein 2 | chr5:22780816-22783137 FORWARD LENGTH=687
	IRGSP	Os03t0657400-00	Hypothetical conserved gene.
	nr	ref|NP_001050814.2|	Os03g0657400 [Oryza sativa Japonica Group] gi|46394374|tpg|DAA05125.1| TPA_inf: WRKY transcription factor 60 [Oryza sativa (indica cultivar-group)] gi|125545112|gb|EAY91251.1| hypothetical protein OsI_12866 [Oryza sativa Indica Group] gi|255674758|dbj|BAF12728.2| Os03g0657400 [Oryza sativa Japonica Group]
CL1930.Contig2_DHA_Root	TAIR	AT5G56270.1	| Symbols: WRKY2, ATWRKY2 | WRKY DNA-binding protein 2 | chr5:22780816-22783137 FORWARD LENGTH=687
	IRGSP	Os03t0657400-00	Hypothetical conserved gene.
	nr	ref|NP_001050814.2|	Os03g0657400 [Oryza sativa Japonica Group] gi|46394374|tpg|DAA05125.1| TPA_inf: WRKY transcription factor 60 [Oryza sativa (indica cultivar-group)] gi|125545112|gb|EAY91251.1| hypothetical protein OsI_12866 [Oryza sativa Indica Group] gi|255674758|dbj|BAF12728.2| Os03g0657400 [Oryza sativa Japonica Group]
CL2245.Contig1_DHA_Root	TAIR	AT1G64000.1	| Symbols: WRKY56, ATWRKY56 | WRKY DNA-binding protein 56 | chr1:23747434-23748883 FORWARD LENGTH=195
	IRGSP	Os01t0734000-01	Similar to WRKY DNA binding protein.
	nr	ref|NP_001044163.1|	Os01g0734000 [Oryza sativa Japonica Group] gi|15624020|dbj|BAB68074.1| putative WRKY DNA binding protein [Oryza sativa Japonica Group] gi|20161004|dbj|BAB89937.1| putative WRKY DNA binding protein [Oryza sativa Japonica Group] gi|33519178|gb|AAQ20904.1| WRKY4 [Oryza sativa Japonica Group] gi|46394300|tpg|DAA05088.1| TPA_inf: WRKY transcription factor 23 [Oryza sativa (japonica cultivar-group)] gi…
CL2282.Contig1_DHA_Root	TAIR	AT2G34830.1	| Symbols: WRKY35, MEE24, AtWRKY35 | WRKY DNA-binding protein 35 | chr2:14693839-14696378 REVERSE LENGTH=427
	IRGSP	Os04t0597300-01	Similar to WERKY protein (Fragment).
	nr	emb|CBI31090.3|	unnamed protein product [Vitis vinifera]
CL2282.Contig2_DHA_Root	TAIR	AT2G34830.1	| Symbols: WRKY35, MEE24, AtWRKY35 | WRKY DNA-binding protein 35 | chr2:14693839-14696378 REVERSE LENGTH=427
	IRGSP	Os04t0597300-01	Similar to WERKY protein (Fragment).
	nr	emb|CBI31090.3|	unnamed protein product [Vitis vinifera]
CL2282.Contig3_DHA_Root	TAIR	AT2G34830.1	| Symbols: WRKY35, MEE24, AtWRKY35 | WRKY DNA-binding protein 35 | chr2:14693839-14696378 REVERSE LENGTH=427
	IRGSP	Os04t0597300-01	Similar to WERKY protein (Fragment).
	nr	gb|EOY25617.1|	WRKY DNA-binding protein 14, putative [Theobroma cacao]
CL2282.Contig4_DHA_Root	TAIR	AT2G34830.1	| Symbols: WRKY35, MEE24, AtWRKY35 | WRKY DNA-binding protein 35 | chr2:14693839-14696378 REVERSE LENGTH=427
	IRGSP	Os04t0597300-01	Similar to WERKY protein (Fragment).
	nr	gb|EOY25617.1|	WRKY DNA-binding protein 14, putative [Theobroma cacao]
CL2282.Contig5_DHA_Root	TAIR	AT2G34830.1	| Symbols: WRKY35, MEE24, AtWRKY35 | WRKY DNA-binding protein 35 | chr2:14693839-14696378 REVERSE LENGTH=427
	IRGSP	Os04t0597300-01	Similar to WERKY protein (Fragment).
	nr	emb|CBI31090.3|	unnamed protein product [Vitis vinifera]
CL2455.Contig1_DHA_Root	TAIR	--No_Hits--
	IRGSP	Os12t0116700-01	Similar to WRKY transcription factor 64.
	nr	--No_Hits--
CL2455.Contig2_DHA_Root	TAIR	--No_Hits--
	IRGSP	Os12t0116700-01	Similar to WRKY transcription factor 64.
	nr	gb|ABA95641.1|	WRKY DNA binding domain containing protein [Oryza sativa Japonica Group] gi|83320253|gb|ABC02811.1| WRKY transcription factor 64 [Oryza sativa] gi|125596419|gb|EAZ36199.1| hypothetical protein OsJ_20513 [Oryza sativa Japonica Group]
CL443.Contig1_DHA_Root	TAIR	AT3G56400.1	| Symbols: WRKY70, ATWRKY70 | WRKY DNA-binding protein 70 | chr3:20909082-20910409 REVERSE LENGTH=294
	IRGSP	Os05t0478700-00	Hypothetical conserved gene.
	nr	gb|AAT01368.1|	hypothetical protein [Oryza sativa Japonica Group]
CL443.Contig4_DHA_Root	TAIR	AT3G56400.1	| Symbols: WRKY70, ATWRKY70 | WRKY DNA-binding protein 70 | chr3:20909082-20910409 REVERSE LENGTH=294
	IRGSP	--No_Hits--
	nr	--No_Hits--
CL4689.Contig1_DHA_Root	TAIR	AT3G56400.1	| Symbols: WRKY70, ATWRKY70 | WRKY DNA-binding protein 70 | chr3:20909082-20910409 REVERSE LENGTH=294
	IRGSP	Os11t0116900-01	Similar to WRKY DNA binding domain containing protein, expressed.
	nr	ref|NP_001065590.1|	Os11g0116900 [Oryza sativa Japonica Group] gi|113644294|dbj|BAF27435.1| Os11g0116900, partial [Oryza sativa Japonica Group]
CL4689.Contig2_DHA_Root	TAIR	AT3G56400.1	| Symbols: WRKY70, ATWRKY70 | WRKY DNA-binding protein 70 | chr3:20909082-20910409 REVERSE LENGTH=294
	IRGSP	Os11t0116900-01	Similar to WRKY DNA binding domain containing protein, expressed.
	nr	ref|NP_001065590.1|	Os11g0116900 [Oryza sativa Japonica Group] gi|113644294|dbj|BAF27435.1| Os11g0116900, partial [Oryza sativa Japonica Group]
CL4689.Contig3_DHA_Root	TAIR	AT3G56400.1	| Symbols: WRKY70, ATWRKY70 | WRKY DNA-binding protein 70 | chr3:20909082-20910409 REVERSE LENGTH=294
	IRGSP	Os11t0116900-01	Similar to WRKY DNA binding domain containing protein, expressed.
	nr	ref|NP_001065590.1|	Os11g0116900 [Oryza sativa Japonica Group] gi|113644294|dbj|BAF27435.1| Os11g0116900, partial [Oryza sativa Japonica Group]
CL4831.Contig2_DHA_Root	TAIR	--No_Hits--
	IRGSP	Os12t0102350-01	Similar to WRKY transcription factor 57.
	nr	--No_Hits--
CL4946.Contig1_DHA_Root	TAIR	AT2G38470.1	| Symbols: WRKY33, ATWRKY33 | WRKY DNA-binding protein 33 | chr2:16108476-16110539 FORWARD LENGTH=519
	IRGSP	Os05t0343400-01	WRKY transcription factor 53 (Transcription factor WRKY12).
	nr	dbj|BAI63296.1|	double WRKY type transfactor [Nicotiana benthamiana]
CL4946.Contig2_DHA_Root	TAIR	AT2G38470.1	| Symbols: WRKY33, ATWRKY33 | WRKY DNA-binding protein 33 | chr2:16108476-16110539 FORWARD LENGTH=519
	IRGSP	Os05t0343400-01	WRKY transcription factor 53 (Transcription factor WRKY12).
	nr	gb|EMJ09489.1|	hypothetical protein PRUPE_ppa003333mg [Prunus persica]
CL5101.Contig1_DHA_Root	TAIR	AT5G56270.1	| Symbols: WRKY2, ATWRKY2 | WRKY DNA-binding protein 2 | chr5:22780816-22783137 FORWARD LENGTH=687
	IRGSP	Os08t0499300-01	WRKY transcription factor 30.
	nr	emb|CBI39865.3|	unnamed protein product [Vitis vinifera]
CL5101.Contig2_DHA_Root	TAIR	AT5G56270.1	| Symbols: WRKY2, ATWRKY2 | WRKY DNA-binding protein 2 | chr5:22780816-22783137 FORWARD LENGTH=687
	IRGSP	Os08t0499300-01	WRKY transcription factor 30.
	nr	emb|CBI39865.3|	unnamed protein product [Vitis vinifera]
CL5101.Contig3_DHA_Root	TAIR	AT5G56270.1	| Symbols: WRKY2, ATWRKY2 | WRKY DNA-binding protein 2 | chr5:22780816-22783137 FORWARD LENGTH=687
	IRGSP	Os01t0826400-01	WRKY transcription factor 24 (WRKY24).
	nr	emb|CBI39865.3|	unnamed protein product [Vitis vinifera]
CL5101.Contig4_DHA_Root	TAIR	AT5G56270.1	| Symbols: WRKY2, ATWRKY2 | WRKY DNA-binding protein 2 | chr5:22780816-22783137 FORWARD LENGTH=687
	IRGSP	Os05t0474800-01	WRKY transcription factor 70.
	nr	gb|EOY11828.1|	WRKY DNA-binding protein 2 isoform 3 [Theobroma cacao] gi|508719932|gb|EOY11829.1| WRKY DNA-binding protein 2 isoform 3 [Theobroma cacao]
CL5171.Contig1_DHA_Root	TAIR	AT1G13960.1	| Symbols: WRKY4 | WRKY DNA-binding protein 4 | chr1:4776622-4779043 FORWARD LENGTH=514
	IRGSP	Os12t0507300-00	Similar to WRKY DNA binding domain containing protein, expressed.
	nr	gb|AAT46067.1|	DNA binding protein WRKY2 [Vitis vinifera]
CL5171.Contig2_DHA_Root	TAIR	AT1G13960.1	| Symbols: WRKY4 | WRKY DNA-binding protein 4 | chr1:4776622-4779043 FORWARD LENGTH=514
	IRGSP	Os12t0507300-00	Similar to WRKY DNA binding domain containing protein, expressed.
	nr	gb|AAT46067.1|	DNA binding protein WRKY2 [Vitis vinifera]
CL658.Contig1_DHA_Root	TAIR	AT4G26640.2	| Symbols: WRKY20, AtWRKY20 | WRKY family transcription factor family protein | chr4:13437298-13440693 REVERSE LENGTH=557
	IRGSP	Os07t0583700-01	WRKY transcription factor 78.
	nr	gb|EAZ04490.1|	hypothetical protein OsI_26641 [Oryza sativa Indica Group]
CL658.Contig2_DHA_Root	TAIR	AT4G26640.2	| Symbols: WRKY20, AtWRKY20 | WRKY family transcription factor family protein | chr4:13437298-13440693 REVERSE LENGTH=557
	IRGSP	Os07t0583700-01	WRKY transcription factor 78.
	nr	gb|EAZ04490.1|	hypothetical protein OsI_26641 [Oryza sativa Indica Group]
CL658.Contig3_DHA_Root	TAIR	AT4G26640.2	| Symbols: WRKY20, AtWRKY20 | WRKY family transcription factor family protein | chr4:13437298-13440693 REVERSE LENGTH=557
	IRGSP	Os07t0583700-01	WRKY transcription factor 78.
	nr	gb|EAZ04490.1|	hypothetical protein OsI_26641 [Oryza sativa Indica Group]
CL658.Contig4_DHA_Root	TAIR	AT4G26640.2	| Symbols: WRKY20, AtWRKY20 | WRKY family transcription factor family protein | chr4:13437298-13440693 REVERSE LENGTH=557
	IRGSP	Os07t0583700-01	WRKY transcription factor 78.
	nr	gb|AFZ45987.1|	WRKYS2 transcription factor, partial [Oryza sativa Japonica Group]
Unigene13977_DHA_Root	TAIR	AT4G22070.1	| Symbols: WRKY31, ATWRKY31 | WRKY DNA-binding protein 31 | chr4:11691381-11694234 REVERSE LENGTH=538
	IRGSP	Os05t0137500-00	Similar to WRKY transcription factor 5.
	nr	gb|EMJ18187.1|	hypothetical protein PRUPE_ppa002619mg [Prunus persica]
Unigene13978_DHA_Root	TAIR	AT4G04450.1	| Symbols: WRKY42, AtWRKY42 | WRKY family transcription factor | chr4:2218379-2221113 FORWARD LENGTH=528
	IRGSP	Os01t0246700-01	Similar to WRKY transcription factor 1.
	nr	ref|XP_002518444.1|	WRKY transcription factor, putative [Ricinus communis] gi|223542289|gb|EEF43831.1| WRKY transcription factor, putative [Ricinus communis]
Unigene14346_DHA_Root	TAIR	AT5G15130.1	| Symbols: WRKY72, ATWRKY72 | WRKY DNA-binding protein 72 | chr5:4904426-4906879 FORWARD LENGTH=548
	IRGSP	Os06t0146250-00	Similar to WRKY transcription factor 73.
	nr	emb|CBI15258.3|	unnamed protein product [Vitis vinifera]
Unigene15986_DHA_Root	TAIR	AT2G34830.1	| Symbols: WRKY35, MEE24, AtWRKY35 | WRKY DNA-binding protein 35 | chr2:14693839-14696378 REVERSE LENGTH=427
	IRGSP	Os04t0597300-01	Similar to WERKY protein (Fragment).
	nr	ref|XP_003524093.1|	PREDICTED: probable WRKY transcription factor 35-like [Glycine max]
Unigene15987_DHA_Root	TAIR	AT2G34830.1	| Symbols: WRKY35, MEE24, AtWRKY35 | WRKY DNA-binding protein 35 | chr2:14693839-14696378 REVERSE LENGTH=427
	IRGSP	Os04t0597300-01	Similar to WERKY protein (Fragment).
	nr	ref|NP_001053735.1|	Os04g0597300 [Oryza sativa Japonica Group] gi|113565306|dbj|BAF15649.1| Os04g0597300 [Oryza sativa Japonica Group]
Unigene17745_DHA_Root	TAIR	AT1G04640.2	| Symbols: LIP2 | lipoyltransferase 2 | chr1:1292541-1293248 FORWARD LENGTH=235
	IRGSP	Os03t0321800-02	Similar to WRKY transcription factor 55.
	nr	ref|XP_004232934.1|	PREDICTED: octanoyltransferase-like isoform 1 [Solanum lycopersicum] gi|460374272|ref|XP_004232935.1| PREDICTED: octanoyltransferase-like isoform 2 [Solanum lycopersicum] gi|460374274|ref|XP_004232936.1| PREDICTED: octanoyltransferase-like isoform 3 [Solanum lycopersicum] gi|460374276|ref|XP_004232937.1| PREDICTED: octanoyltransferase-like isoform 4 [Solanum lycopersicum]
Unigene17746_DHA_Root	TAIR	AT1G04640.2	| Symbols: LIP2 | lipoyltransferase 2 | chr1:1292541-1293248 FORWARD LENGTH=235
	IRGSP	Os03t0321800-02	Similar to WRKY transcription factor 55.
	nr	gb|EOA38434.1|	hypothetical protein CARUB_v10010053mg, partial [Capsella rubella]
Unigene18940_DHA_Root	TAIR	AT4G26640.2	| Symbols: WRKY20, AtWRKY20 | WRKY family transcription factor family protein | chr4:13437298-13440693 REVERSE LENGTH=557
	IRGSP	Os07t0583700-01	WRKY transcription factor 78.
	nr	gb|AEQ29020.1|	WRKY7 [Panax quinquefolius]
Unigene18941_DHA_Root	TAIR	AT5G56270.1	| Symbols: WRKY2, ATWRKY2 | WRKY DNA-binding protein 2 | chr5:22780816-22783137 FORWARD LENGTH=687
	IRGSP	Os09t0481700-02	SUSIBA2-like (WRKY transcription factor 80).
	nr	emb|CBI39865.3|	unnamed protein product [Vitis vinifera]
Unigene22215_DHA_Root	TAIR	AT4G11070.2	| Symbols: WRKY41, AtWRKY41 | WRKY family transcription factor | chr4:6759303-6760763 FORWARD LENGTH=281
	IRGSP	Os09t0334500-01	WRKY transcription factor 74.
	nr	gb|EOY23457.1|	WRKY DNA-binding protein 30, putative [Theobroma cacao]
Unigene22737_DHA_Root	TAIR	AT2G38470.1	| Symbols: WRKY33, ATWRKY33 | WRKY DNA-binding protein 33 | chr2:16108476-16110539 FORWARD LENGTH=519
	IRGSP	Os01t0826400-01	WRKY transcription factor 24 (WRKY24).
	nr	gb|EOY34631.1|	WRKY DNA-binding protein 33 isoform 1 [Theobroma cacao]
Unigene22738_DHA_Root	TAIR	AT2G38470.1	| Symbols: WRKY33, ATWRKY33 | WRKY DNA-binding protein 33 | chr2:16108476-16110539 FORWARD LENGTH=519
	IRGSP	Os01t0826400-01	WRKY transcription factor 24 (WRKY24).
	nr	gb|EOY34631.1|	WRKY DNA-binding protein 33 isoform 1 [Theobroma cacao]
Unigene22739_DHA_Root	TAIR	AT2G38470.1	| Symbols: WRKY33, ATWRKY33 | WRKY DNA-binding protein 33 | chr2:16108476-16110539 FORWARD LENGTH=519
	IRGSP	Os05t0343400-01	WRKY transcription factor 53 (Transcription factor WRKY12).
	nr	gb|AAS13439.1|	WRKY3 [Nicotiana attenuata]
Unigene22740_DHA_Root	TAIR	AT2G38470.1	| Symbols: WRKY33, ATWRKY33 | WRKY DNA-binding protein 33 | chr2:16108476-16110539 FORWARD LENGTH=519
	IRGSP	Os05t0343400-01	WRKY transcription factor 53 (Transcription factor WRKY12).
	nr	gb|AAS13439.1|	WRKY3 [Nicotiana attenuata]
nigene24483_DHA_Root	TAIR	--No_Hits--
	IRGSP	Os11t0116900-01	Similar to WRKY DNA binding domain containing protein, expressed.
	nr	--No_Hits--
Unigene25473_DHA_Root	TAIR	AT5G52830.1	| Symbols: WRKY27, ATWRKY27 | WRKY DNA-binding protein 27 | chr5:21410996-21412218 FORWARD LENGTH=348
	IRGSP	Os02t0265200-01	WRKY transcription factor 39.
	nr	ref|XP_004492798.1|	PREDICTED: WRKY transcription factor 22-like [Cicer arietinum]
Unigene26110_DHA_Root	TAIR	AT1G30650.1	| Symbols: WRKY14, ATWRKY14, AR411 | WRKY DNA-binding protein 14 | chr1:10868612-10870973 FORWARD LENGTH=430
	IRGSP	Os02t0265200-01	WRKY transcription factor 39.
	nr	ref|XP_004492798.1|	PREDICTED: WRKY transcription factor 22-like [Cicer arietinum]
Unigene27380_DHA_Root	TAIR	AT3G04670.1	| Symbols: WRKY39, ATWRKY39 | WRKY DNA-binding protein 39 | chr3:1266530-1267691 REVERSE LENGTH=330
	IRGSP	Os12t0597700-01	Similar to WRKY2 (Fragment).
	nr	ref|XP_002520995.1|	WRKY transcription factor, putative [Ricinus communis] gi|223539832|gb|EEF41412.1| WRKY transcription factor, putative [Ricinus communis]
Unigene28619_DHA_Root	TAIR	AT5G24110.1	| Symbols: WRKY30, ATWRKY30 | WRKY DNA-binding protein 30 | chr5:8153416-8154633 REVERSE LENGTH=303
	IRGSP	Os01t0656400-00	Similar to WRKY transcription factor 15.
	nr	gb|EOY23457.1|	WRKY DNA-binding protein 30, putative [Theobroma cacao]
Unigene29027_DHA_Root	TAIR	AT1G80840.1	| Symbols: WRKY40, ATWRKY40 | WRKY DNA-binding protein 40 | chr1:30383834-30385356 FORWARD LENGTH=302
	IRGSP	Os06t0649000-02	Similar to WRKY transcription factor 28.
	nr	gb|EOY26053.1|	WRKY DNA-binding protein 40, putative isoform 2 [Theobroma cacao]
Unigene29592_DHA_Root	TAIR	AT1G13960.2	| Symbols: WRKY4 | WRKY DNA-binding protein 4 | chr1:4776622-4779043 FORWARD LENGTH=487
	IRGSP	Os12t0507300-00	Similar to WRKY DNA binding domain containing protein, expressed.
	nr	ref|XP_003571606.1|	PREDICTED: probable WRKY transcription factor 4-like [Brachypodium distachyon]
Unigene29729_DHA_Root	TAIR	AT2G34830.1	| Symbols: WRKY35, MEE24, AtWRKY35 | WRKY DNA-binding protein 35 | chr2:14693839-14696378 REVERSE LENGTH=427
	IRGSP	Os04t0597300-01	Similar to WERKY protein (Fragment).
	nr	gb|EMT18262.1|	Putative WRKY transcription factor 35 [Aegilops tauschii]
Unigene30135_DHA_Root	TAIR	AT4G31550.2	| Symbols: WRKY11, ATWRKY11 | WRKY DNA-binding protein 11 | chr4:15290065-15291458 REVERSE LENGTH=324
	IRGSP	Os04t0287400-01	Similar to WRKY transcription factor 51.
	nr	emb|CBI17876.3|	unnamed protein product [Vitis vinifera]
Unigene30407_DHA_Root	TAIR	AT2G38470.1	| Symbols: WRKY33, ATWRKY33 | WRKY DNA-binding protein 33 | chr2:16108476-16110539 FORWARD LENGTH=519
	IRGSP	Os01t0826400-01	WRKY transcription factor 24 (WRKY24).
	nr	emb|CBI15865.3|	unnamed protein product [Vitis vinifera]
Unigene30907_DHA_Root	TAIR	AT1G62300.1	| Symbols: WRKY6, ATWRKY6 | WRKY family transcription factor | chr1:23016887-23019155 REVERSE LENGTH=553
	IRGSP	Os05t0137500-00	Similar to WRKY transcription factor 5.
	nr	ref|XP_002518444.1|	WRKY transcription factor, putative [Ricinus communis] gi|223542289|gb|EEF43831.1| WRKY transcription factor, putative [Ricinus communis]
Unigene31004_DHA_Root	TAIR	AT1G66550.2	| Symbols: WRKY67, ATWRKY67 | WRKY DNA-binding protein 67 | chr1:24828537-24829589 FORWARD LENGTH=249
	IRGSP	Os11t0117500-01	DNA-binding WRKY domain containing protein.
	nr	gb|ABA96294.1|	WRKY DNA binding domain containing protein, expressed [Oryza sativa Japonica Group] gi|125578297|gb|EAZ19443.1| hypothetical protein OsJ_35004 [Oryza sativa Japonica Group]
Unigene32757_DHA_Root	TAIR	AT1G80840.1	| Symbols: WRKY40, ATWRKY40 | WRKY DNA-binding protein 40 | chr1:30383834-30385356 FORWARD LENGTH=302
	IRGSP	Os06t0649000-02	Similar to WRKY transcription factor 28.
	nr	gb|ADU02585.1|	WRKY transcription factor 4 [Vitis vinifera]
Unigene32854_DHA_Root	TAIR	AT5G49520.1	| Symbols: WRKY48, ATWRKY48 | WRKY DNA-binding protein 48 | chr5:20090890-20092867 FORWARD LENGTH=399
	IRGSP	Os05t0565900-00	DNA-binding WRKY domain containing protein.
	nr	ref|XP_002279385.1|	PREDICTED: probable WRKY transcription factor 48 [Vitis vinifera] gi|296083226|emb|CBI22862.3| unnamed protein product [Vitis vinifera]
Unigene32883_DHA_Root	TAIR	AT3G56400.1	| Symbols: WRKY70, ATWRKY70 | WRKY DNA-binding protein 70 | chr3:20909082-20910409 REVERSE LENGTH=294
	IRGSP	Os05t0322900-01	Similar to WRKY transcription factor 45.
	nr	ref|XP_003566383.1|	PREDICTED: uncharacterized protein LOC100836752 [Brachypodium distachyon]
Unigene33228_DHA_Root	TAIR	AT5G64810.1	| Symbols: WRKY51, ATWRKY51 | WRKY DNA-binding protein 51 | chr5:25908415-25909687 FORWARD LENGTH=194
	IRGSP	Os05t0537100-00	WRKY transcription factor 10.
	nr	ref|XP_002440147.1|	hypothetical protein SORBIDRAFT_09g026830 [Sorghum bicolor] gi|241945432|gb|EES18577.1| hypothetical protein SORBIDRAFT_09g026830 [Sorghum bicolor]
Unigene34396_DHA_Root	TAIR	AT1G28280.2	| Symbols: | VQ motif-containing protein | chr1:9886297-9887395 REVERSE LENGTH=243
	IRGSP	Os01t0201250-00	Similar to DNA-binding WRKY.
	nr	ref|XP_002285047.1|	PREDICTED: uncharacterized protein LOC100262369 [Vitis vinifera]
Unigene35187_DHA_Root	TAIR	AT1G04640.2	| Symbols: LIP2 | lipoyltransferase 2 | chr1:1292541-1293248 FORWARD LENGTH=235
	IRGSP	Os03t0321800-02	Similar to WRKY transcription factor 55.
	nr	ref|XP_002525976.1|	lipoate-protein ligase B, putative [Ricinus communis] gi|223534708|gb|EEF36400.1| lipoate-protein ligase B, putative [Ricinus communis]
Unigene40242_DHA_Root	TAIR	AT3G29185.2	| Symbols: | Domain of unknown function (DUF3598) | chr3:11155092-11157207 REVERSE LENGTH=411
	IRGSP	Os03t0758900-01	Similar to predicted protein.
	nr	gb|AEO31475.1|	WRKY transcription factor 11-2 [Dimocarpus longan]
Unigene42624_DHA_Root	TAIR	AT1G68150.1	| Symbols: WRKY9, ATWRKY9 | WRKY DNA-binding protein 9 | chr1:25543970-25545615 FORWARD LENGTH=374
	IRGSP	Os02t0770500-00	Similar to WRKY transcription factor 32.
	nr	ref|XP_003573034.1|	PREDICTED: probable WRKY transcription factor 72-like [Brachypodium distachyon]
Unigene43585_DHA_Root	TAIR	AT2G03340.1	| Symbols: WRKY3 | WRKY DNA-binding protein 3 | chr2:1014724-1016936 REVERSE LENGTH=513
	IRGSP	Os04t0471700-00	Similar to WRKY10 (WRKY transcription factor 35).
	nr	ref|XP_003522837.1|	PREDICTED: probable WRKY transcription factor 2-like [Glycine max]
Unigene574_DHA_Root	TAIR	--No_Hits--
	IRGSP	--No_Hits--
	nr	ref|XP_003519273.1|	PREDICTED: probable WRKY transcription factor 33 [Glycine max]
Unigene59_DHA_Root	TAIR	AT3G29185.2	| Symbols: | Domain of unknown function (DUF3598) | chr3:11155092-11157207 REVERSE LENGTH=411
	IRGSP	Os03t0758900-01	Similar to predicted protein.
	nr	gb|AEO31475.1|	WRKY transcription factor 11-2 [Dimocarpus longan]
Unigene6841_DHA_Root	TAIR	AT5G64810.1	| Symbols: WRKY51, ATWRKY51 | WRKY DNA-binding protein 51 | chr5:25908415-25909687 FORWARD LENGTH=194
	IRGSP	Os05t0537100-00	WRKY transcription factor 10.
	nr	gb|ADF42578.1|	putative pathogenesis protein [Phyllostachys edulis]
Unigene8079_DHA_Root	TAIR	AT5G13080.1	| Symbols: WRKY75, ATWRKY75 | WRKY DNA-binding protein 75 | chr5:4149928-4151019 REVERSE LENGTH=145
	IRGSP	Os11t0490900-01	Similar to WRKY transcription factor 72.
	nr	tpg|DAA41982.1|	TPA: putative WRKY DNA-binding domain superfamily protein [Zea mays]
Unigene8617_DHA_Root	TAIR	AT1G29280.1	| Symbols: WRKY65, ATWRKY65 | WRKY DNA-binding protein 65 | chr1:10236589-10237467 FORWARD LENGTH=259
	IRGSP	Os01t0750100-03	Similar to WRKY13 transcription factor.
	nr	ref|XP_002269267.1|	PREDICTED: probable WRKY transcription factor 65 [Vitis vinifera] gi|297740534|emb|CBI30716.3| unnamed protein product [Vitis vinifera]
CL1220.Contig1_F1_Root	TAIR	AT4G26640.2	| Symbols: WRKY20, AtWRKY20 | WRKY family transcription factor family protein | chr4:13437298-13440693 REVERSE LENGTH=557
	IRGSP	Os07t0583700-01	WRKY transcription factor 78.
	nr	gb|EAZ04490.1|	hypothetical protein OsI_26641 [Oryza sativa Indica Group]
CL1220.Contig2_F1_Root	TAIR	AT4G26640.2	| Symbols: WRKY20, AtWRKY20 | WRKY family transcription factor family protein | chr4:13437298-13440693 REVERSE LENGTH=557
	IRGSP	Os07t0583700-01	WRKY transcription factor 78.
	nr	gb|EAZ04490.1|	hypothetical protein OsI_26641 [Oryza sativa Indica Group]
CL156.Contig1_F1_Root	TAIR	AT5G56270.1	| Symbols: WRKY2, ATWRKY2 | WRKY DNA-binding protein 2 | chr5:22780816-22783137 FORWARD LENGTH=687
	IRGSP	Os09t0481700-02	SUSIBA2-like (WRKY transcription factor 80).
	nr	gb|ADL36865.1|	WRKY domain class transcription factor [Malus x domestica]
CL1643.Contig1_F1_Root	TAIR	AT3G56400.1	| Symbols: WRKY70, ATWRKY70 | WRKY DNA-binding protein 70 | chr3:20909082-20910409 REVERSE LENGTH=294
	IRGSP	Os05t0478700-00	Hypothetical conserved gene.
	nr	gb|EAY76297.1|	hypothetical protein OsI_04231 [Oryza sativa Indica Group]
CL4409.Contig1_F1_Root	TAIR	AT2G38470.1	| Symbols: WRKY33, ATWRKY33 | WRKY DNA-binding protein 33 | chr2:16108476-16110539 FORWARD LENGTH=519
	IRGSP	Os01t0826400-01	WRKY transcription factor 24 (WRKY24).
	nr	dbj|BAA06278.1|	SPF1 protein [Ipomoea batatas]
CL4409.Contig3_F1_Root	TAIR	AT2G38470.1	| Symbols: WRKY33, ATWRKY33 | WRKY DNA-binding protein 33 | chr2:16108476-16110539 FORWARD LENGTH=519
	IRGSP	Os05t0343400-01	WRKY transcription factor 53 (Transcription factor WRKY12).
	nr	dbj|BAI63296.1|	double WRKY type transfactor [Nicotiana benthamiana]
CL4538.Contig1_F1_Root	TAIR	AT5G64810.1	| Symbols: WRKY51, ATWRKY51 | WRKY DNA-binding protein 51 | chr5:25908415-25909687 FORWARD LENGTH=194
	IRGSP	Os05t0537100-00	WRKY transcription factor 10.
	nr	ref|XP_002440147.1|	hypothetical protein SORBIDRAFT_09g026830 [Sorghum bicolor] gi|241945432|gb|EES18577.1| hypothetical protein SORBIDRAFT_09g026830 [Sorghum bicolor]
CL4538.Contig2_F1_Root	TAIR	AT5G64810.1	| Symbols: WRKY51, ATWRKY51 | WRKY DNA-binding protein 51 | chr5:25908415-25909687 FORWARD LENGTH=194
	IRGSP	Os05t0537100-00	WRKY transcription factor 10.
	nr	gb|AFW78902.1|	putative WRKY DNA-binding domain superfamily protein [Zea mays]
CL5035.Contig1_F1_Root	TAIR	AT2G40750.1	| Symbols: WRKY54, ATWRKY54 | WRKY DNA-binding protein 54 | chr2:17000636-17002354 REVERSE LENGTH=346
	IRGSP	Os12t0116400-00	Similar to WRKY DNA binding domain containing protein, expressed.
	nr	gb|AFW64632.1|	putative WRKY DNA-binding domain superfamily protein [Zea mays]
CL5035.Contig2_F1_Root	TAIR	AT1G66550.2	| Symbols: WRKY67, ATWRKY67 | WRKY DNA-binding protein 67 | chr1:24828537-24829589 FORWARD LENGTH=249
	IRGSP	Os11t0117500-01	DNA-binding WRKY domain containing protein.
	nr	gb|ABA96294.1|	WRKY DNA binding domain containing protein, expressed [Oryza sativa Japonica Group] gi|125578297|gb|EAZ19443.1| hypothetical protein OsJ_35004 [Oryza sativa Japonica Group]
CL5849.Contig1_F1_Root	TAIR	AT2G38470.1	| Symbols: WRKY33, ATWRKY33 | WRKY DNA-binding protein 33 | chr2:16108476-16110539 FORWARD LENGTH=519
	IRGSP	Os01t0826400-01	WRKY transcription factor 24 (WRKY24).
	nr	gb|EOY34631.1|	WRKY DNA-binding protein 33 isoform 1 [Theobroma cacao]
CL5849.Contig2_F1_Root	TAIR	AT2G38470.1	| Symbols: WRKY33, ATWRKY33 | WRKY DNA-binding protein 33 | chr2:16108476-16110539 FORWARD LENGTH=519
	IRGSP	Os05t0343400-01	WRKY transcription factor 53 (Transcription factor WRKY12).
	nr	gb|AAS13439.1|	WRKY3 [Nicotiana attenuata]
CL5849.Contig3_F1_Root	TAIR	AT2G38470.1	| Symbols: WRKY33, ATWRKY33 | WRKY DNA-binding protein 33 | chr2:16108476-16110539 FORWARD LENGTH=519
	IRGSP	Os05t0343400-01	WRKY transcription factor 53 (Transcription factor WRKY12).
	nr	gb|AAS13439.1|	WRKY3 [Nicotiana attenuata]
CL6159.Contig1_F1_Root	TAIR	AT2G38470.1	| Symbols: WRKY33, ATWRKY33 | WRKY DNA-binding protein 33 | chr2:16108476-16110539 FORWARD LENGTH=519
	IRGSP	Os05t0343400-01	WRKY transcription factor 53 (Transcription factor WRKY12).
	nr	gb|EMJ09489.1|	hypothetical protein PRUPE_ppa003333mg [Prunus persica]
CL640.Contig1_F1_Root	TAIR	AT2G34830.1	| Symbols: WRKY35, MEE24, AtWRKY35 | WRKY DNA-binding protein 35 | chr2:14693839-14696378 REVERSE LENGTH=427
	IRGSP	Os04t0597300-01	Similar to WERKY protein (Fragment).
	nr	emb|CBI31090.3|	unnamed protein product [Vitis vinifera]
CL640.Contig2_F1_Root	TAIR	AT2G34830.1	| Symbols: WRKY35, MEE24, AtWRKY35 | WRKY DNA-binding protein 35 | chr2:14693839-14696378 REVERSE LENGTH=427
	IRGSP	Os04t0597300-01	Similar to WERKY protein (Fragment).
	nr	emb|CBI31090.3|	unnamed protein product [Vitis vinifera]
Unigene11202_F1_Root	TAIR	AT5G15130.1	| Symbols: WRKY72, ATWRKY72 | WRKY DNA-binding protein 72 | chr5:4904426-4906879 FORWARD LENGTH=548
	IRGSP	Os06t0146250-00	Similar to WRKY transcription factor 73.
	nr	ref|NP_001234773.1|	WRKY72-like protein [Solanum lycopersicum] gi|300498296|gb|ADK23850.1| WRKY72-like protein [Solanum lycopersicum]
Unigene15059_F1_Root	TAIR	AT3G04670.1	| Symbols: WRKY39, ATWRKY39 | WRKY DNA-binding protein 39 | chr3:1266530-1267691 REVERSE LENGTH=330
	IRGSP	Os12t0597700-01	Similar to WRKY2 (Fragment).
	nr	ref|XP_002520995.1|	WRKY transcription factor, putative [Ricinus communis] gi|223539832|gb|EEF41412.1| WRKY transcription factor, putative [Ricinus communis]
Unigene15094_F1_Root	TAIR	AT5G15130.1	| Symbols: WRKY72, ATWRKY72 | WRKY DNA-binding protein 72 | chr5:4904426-4906879 FORWARD LENGTH=548
	IRGSP	Os06t0146250-00	Similar to WRKY transcription factor 73.
	nr	emb|CBI15258.3|	unnamed protein product [Vitis vinifera]
Unigene16406_F1_Root	TAIR	AT3G56400.1	| Symbols: WRKY70, ATWRKY70 | WRKY DNA-binding protein 70 | chr3:20909082-20910409 REVERSE LENGTH=294
	IRGSP	Os11t0116900-01	Similar to WRKY DNA binding domain containing protein, expressed.
	nr	ref|NP_001065590.1|	Os11g0116900 [Oryza sativa Japonica Group] gi|113644294|dbj|BAF27435.1| Os11g0116900, partial [Oryza sativa Japonica Group]
Unigene16407_F1_Root	TAIR	--No_Hits--
	IRGSP	Os11t0116900-01	Similar to WRKY DNA binding domain containing protein, expressed.
	nr	--No_Hits--
Unigene18300_F1_Root	TAIR	AT4G22070.1	| Symbols: WRKY31, ATWRKY31 | WRKY DNA-binding protein 31 | chr4:11691381-11694234 REVERSE LENGTH=538
	IRGSP	Os05t0137500-00	Similar to WRKY transcription factor 5.
	nr	ref|XP_002269696.2|	PREDICTED: WRKY transcription factor 6-like [Vitis vinifera]
Unigene19032_F1_Root	TAIR	AT2G38470.1	| Symbols: WRKY33, ATWRKY33 | WRKY DNA-binding protein 33 | chr2:16108476-16110539 FORWARD LENGTH=519
	IRGSP	Os05t0343400-01	WRKY transcription factor 53 (Transcription factor WRKY12).
	nr	gb|EMJ06226.1|	hypothetical protein PRUPE_ppa004009mg [Prunus persica]
Unigene19033_F1_Root	TAIR	AT5G56270.1	| Symbols: WRKY2, ATWRKY2 | WRKY DNA-binding protein 2 | chr5:22780816-22783137 FORWARD LENGTH=687
	IRGSP	Os04t0471700-00	Similar to WRKY10 (WRKY transcription factor 35).
	nr	gb|EOA13007.1|	hypothetical protein CARUB_v10026001mg [Capsella rubella]
Unigene20323_F1_Root	TAIR	AT3G56400.1	| Symbols: WRKY70, ATWRKY70 | WRKY DNA-binding protein 70 | chr3:20909082-20910409 REVERSE LENGTH=294
	IRGSP	Os05t0478400-00	Similar to WRKY transcription factor 48.
	nr	gb|EOY04438.1|	WRKY DNA-binding protein 70, putative isoform 1 [Theobroma cacao]
Unigene20777_F1_Root	TAIR	AT1G13960.1	| Symbols: WRKY4 | WRKY DNA-binding protein 4 | chr1:4776622-4779043 FORWARD LENGTH=514
	IRGSP	Os12t0507300-00	Similar to WRKY DNA binding domain containing protein, expressed.
	nr	gb|AAT46067.1|	DNA binding protein WRKY2 [Vitis vinifera]
Unigene22298_F1_Root	TAIR	AT2G38470.1	| Symbols: WRKY33, ATWRKY33 | WRKY DNA-binding protein 33 | chr2:16108476-16110539 FORWARD LENGTH=519
	IRGSP	Os05t0343400-01	WRKY transcription factor 53 (Transcription factor WRKY12).
	nr	dbj|BAJ33769.1|	unnamed protein product [Thellungiella halophila]
Unigene24570_F1_Root	TAIR	AT5G49520.1	| Symbols: WRKY48, ATWRKY48 | WRKY DNA-binding protein 48 | chr5:20090890-20092867 FORWARD LENGTH=399
	IRGSP	Os05t0565900-00	DNA-binding WRKY domain containing protein.
	nr	ref|XP_002279385.1|	PREDICTED: probable WRKY transcription factor 48 [Vitis vinifera] gi|296083226|emb|CBI22862.3| unnamed protein product [Vitis vinifera]
Unigene24686_F1_Root	TAIR	AT1G80840.1	| Symbols: WRKY40, ATWRKY40 | WRKY DNA-binding protein 40 | chr1:30383834-30385356 FORWARD LENGTH=302
	IRGSP	Os06t0649000-02	Similar to WRKY transcription factor 28.
	nr	gb|ADU02585.1|	WRKY transcription factor 4 [Vitis vinifera]
Unigene25016_F1_Root	TAIR	--No_Hits--
	IRGSP	--No_Hits--
	nr	ref|XP_003519273.1|	PREDICTED: probable WRKY transcription factor 33 [Glycine max]
Unigene25274_F1_Root	TAIR	AT4G01250.1	| Symbols: WRKY22, AtWRKY22 | WRKY family transcription factor | chr4:522839-524129 REVERSE LENGTH=298
	IRGSP	Os02t0265200-01	WRKY transcription factor 39.
	nr	ref|XP_004492798.1|	PREDICTED: WRKY transcription factor 22-like [Cicer arietinum]
Unigene25667_F1_Root	TAIR	AT5G13080.1	| Symbols: WRKY75, ATWRKY75 | WRKY DNA-binding protein 75 | chr5:4149928-4151019 REVERSE LENGTH=145
	IRGSP	Os11t0490900-01	Similar to WRKY transcription factor 72.
	nr	tpg|DAA41982.1|	TPA: putative WRKY DNA-binding domain superfamily protein [Zea mays]
Unigene26204_F1_Root	TAIR	AT1G13960.2	| Symbols: WRKY4 | WRKY DNA-binding protein 4 | chr1:4776622-4779043 FORWARD LENGTH=487
	IRGSP	Os12t0507300-00	Similar to WRKY DNA binding domain containing protein, expressed.
	nr	ref|XP_003571606.1|	PREDICTED: probable WRKY transcription factor 4-like [Brachypodium distachyon]
Unigene26723_F1_Root	TAIR	AT1G80840.1	| Symbols: WRKY40, ATWRKY40 | WRKY DNA-binding protein 40 | chr1:30383834-30385356 FORWARD LENGTH=302
	IRGSP	Os06t0649000-02	Similar to WRKY transcription factor 28.
	nr	gb|EOY26053.1|	WRKY DNA-binding protein 40, putative isoform 2 [Theobroma cacao]
Unigene28170_F1_Root	TAIR	AT5G24110.1	| Symbols: WRKY30, ATWRKY30 | WRKY DNA-binding protein 30 | chr5:8153416-8154633 REVERSE LENGTH=303
	IRGSP	Os01t0656400-00	Similar to WRKY transcription factor 15.
	nr	gb|EOY23457.1|	WRKY DNA-binding protein 30, putative [Theobroma cacao]
Unigene29987_F1_Root	TAIR	AT5G56270.1	| Symbols: WRKY2, ATWRKY2 | WRKY DNA-binding protein 2 | chr5:22780816-22783137 FORWARD LENGTH=687
	IRGSP	Os09t0481700-02	SUSIBA2-like (WRKY transcription factor 80).
	nr	ref|XP_002529203.1|	conserved hypothetical protein [Ricinus communis] gi|223531321|gb|EEF33159.1| conserved hypothetical protein [Ricinus communis]
Unigene30385_F1_Root	TAIR	AT1G04640.2	| Symbols: LIP2 | lipoyltransferase 2 | chr1:1292541-1293248 FORWARD LENGTH=235
	IRGSP	Os03t0321800-02	Similar to WRKY transcription factor 55.
	nr	ref|XP_002525976.1|	lipoate-protein ligase B, putative [Ricinus communis] gi|223534708|gb|EEF36400.1| lipoate-protein ligase B, putative [Ricinus communis]
Unigene32436_F1_Root	TAIR	AT5G56270.1	| Symbols: WRKY2, ATWRKY2 | WRKY DNA-binding protein 2 | chr5:22780816-22783137 FORWARD LENGTH=687
	IRGSP	Os01t0826400-01	WRKY transcription factor 24 (WRKY24).
	nr	ref|XP_002444812.1|	hypothetical protein SORBIDRAFT_07g028430 [Sorghum bicolor] gi|241941162|gb|EES14307.1| hypothetical protein SORBIDRAFT_07g028430 [Sorghum bicolor]
Unigene4276_F1_Root	TAIR	AT1G28280.2	| Symbols: | VQ motif-containing protein | chr1:9886297-9887395 REVERSE LENGTH=243
	IRGSP	Os01t0201250-00	Similar to DNA-binding WRKY.
	nr	ref|XP_002285047.1|	PREDICTED: uncharacterized protein LOC100262369 [Vitis vinifera]
Unigene45489_F1_Root	TAIR	AT3G01080.1	| Symbols: WRKY58, ATWRKY58 | WRKY DNA-binding protein 58 | chr3:25507-27449 FORWARD LENGTH=423
	IRGSP	Os04t0471700-00	Similar to WRKY10 (WRKY transcription factor 35).
	nr	ref|XP_002529203.1|	conserved hypothetical protein [Ricinus communis] gi|223531321|gb|EEF33159.1| conserved hypothetical protein [Ricinus communis]
Unigene47323_F1_Root	TAIR	AT4G01250.1	| Symbols: WRKY22, AtWRKY22 | WRKY family transcription factor | chr4:522839-524129 REVERSE LENGTH=298
	IRGSP	Os02t0265200-01	WRKY transcription factor 39.
	nr	ref|XP_002511920.1|	WRKY transcription factor, putative [Ricinus communis] gi|223549100|gb|EEF50589.1| WRKY transcription factor, putative [Ricinus communis]
Unigene47916_F1_Root	TAIR	AT4G04450.1	| Symbols: WRKY42, AtWRKY42 | WRKY family transcription factor | chr4:2218379-2221113 FORWARD LENGTH=528
	IRGSP	--No_Hits--
	nr	ref|XP_002518444.1|	WRKY transcription factor, putative [Ricinus communis] gi|223542289|gb|EEF43831.1| WRKY transcription factor, putative [Ricinus communis]
Unigene6044_F1_Root	TAIR	AT4G11070.2	| Symbols: WRKY41, AtWRKY41 | WRKY family transcription factor | chr4:6759303-6760763 FORWARD LENGTH=281
	IRGSP	Os09t0334500-01	WRKY transcription factor 74.
	nr	gb|EOY23457.1|	WRKY DNA-binding protein 30, putative [Theobroma cacao]
Unigene6310_F1_Root	TAIR	AT1G30650.1	| Symbols: WRKY14, ATWRKY14, AR411 | WRKY DNA-binding protein 14 | chr1:10868612-10870973 FORWARD LENGTH=430
	IRGSP	Os02t0265200-01	WRKY transcription factor 39.
	nr	ref|XP_004492798.1|	PREDICTED: WRKY transcription factor 22-like [Cicer arietinum]
Unigene6531_F1_Root	TAIR	AT1G29280.1	| Symbols: WRKY65, ATWRKY65 | WRKY DNA-binding protein 65 | chr1:10236589-10237467 FORWARD LENGTH=259
	IRGSP	Os01t0750100-03	Similar to WRKY13 transcription factor.
	nr	ref|XP_002269267.1|	PREDICTED: probable WRKY transcription factor 65 [Vitis vinifera] gi|297740534|emb|CBI30716.3| unnamed protein product [Vitis vinifera]
Unigene6568_F1_Root	TAIR	AT1G62300.1	| Symbols: WRKY6, ATWRKY6 | WRKY family transcription factor | chr1:23016887-23019155 REVERSE LENGTH=553
	IRGSP	Os05t0137500-00	Similar to WRKY transcription factor 5.
	nr	ref|XP_002518444.1|	WRKY transcription factor, putative [Ricinus communis] gi|223542289|gb|EEF43831.1| WRKY transcription factor, putative [Ricinus communis]
Unigene6799_F1_Root	TAIR	AT3G56400.1	| Symbols: WRKY70, ATWRKY70 | WRKY DNA-binding protein 70 | chr3:20909082-20910409 REVERSE LENGTH=294
	IRGSP	Os05t0322900-01	Similar to WRKY transcription factor 45.
	nr	ref|XP_003566383.1|	PREDICTED: uncharacterized protein LOC100836752 [Brachypodium distachyon]
Unigene7077_F1_Root	TAIR	AT4G31550.2	| Symbols: WRKY11, ATWRKY11 | WRKY DNA-binding protein 11 | chr4:15290065-15291458 REVERSE LENGTH=324
	IRGSP	Os04t0287400-01	Similar to WRKY transcription factor 51.
	nr	emb|CBI17876.3|	unnamed protein product [Vitis vinifera]
Unigene7198_F1_Root	TAIR	AT5G56270.1	| Symbols: WRKY2, ATWRKY2 | WRKY DNA-binding protein 2 | chr5:22780816-22783137 FORWARD LENGTH=687
	IRGSP	Os04t0471700-00	Similar to WRKY10 (WRKY transcription factor 35).
	nr	gb|AER70305.1|	WRKY transcription factor [(Populus tomentosa x P. bolleana) x P. tomentosa]
Unigene7807_F1_Root	TAIR	AT5G56270.1	| Symbols: WRKY2, ATWRKY2 | WRKY DNA-binding protein 2 | chr5:22780816-22783137 FORWARD LENGTH=687
	IRGSP	Os08t0499300-01	WRKY transcription factor 30.
	nr	ref|XP_003522837.1|	PREDICTED: probable WRKY transcription factor 2-like [Glycine max]
Unigene8129_F1_Root	TAIR	AT2G34830.1	| Symbols: WRKY35, MEE24, AtWRKY35 | WRKY DNA-binding protein 35 | chr2:14693839-14696378 REVERSE LENGTH=427
	IRGSP	Os04t0597300-01	Similar to WERKY protein (Fragment).
	nr	ref|XP_003524093.1|	PREDICTED: probable WRKY transcription factor 35-like [Glycine max]
Unigene8130_F1_Root	TAIR	AT2G34830.1	| Symbols: WRKY35, MEE24, AtWRKY35 | WRKY DNA-binding protein 35 | chr2:14693839-14696378 REVERSE LENGTH=427
	IRGSP	Os04t0597300-01	Similar to WERKY protein (Fragment).
	nr	ref|NP_001053735.1|	Os04g0597300 [Oryza sativa Japonica Group] gi|113565306|dbj|BAF15649.1| Os04g0597300 [Oryza sativa Japonica Group]
CL1629.Contig1_A.roylei_Root	TAIR	AT4G26640.2	| Symbols: WRKY20, AtWRKY20 | WRKY family transcription factor family protein | chr4:13437298-13440693 REVERSE LENGTH=557
	IRGSP	Os07t0583700-01	WRKY transcription factor 78.
	nr	gb|EAZ04490.1|	hypothetical protein OsI_26641 [Oryza sativa Indica Group]
CL1629.Contig2_A.roylei_Root	TAIR	AT4G26640.2	| Symbols: WRKY20, AtWRKY20 | WRKY family transcription factor family protein | chr4:13437298-13440693 REVERSE LENGTH=557
	IRGSP	Os07t0583700-01	WRKY transcription factor 78.
	nr	gb|EAZ04490.1|	hypothetical protein OsI_26641 [Oryza sativa Indica Group]
CL1629.Contig3_A.roylei_Root	TAIR	AT4G26640.2	| Symbols: WRKY20, AtWRKY20 | WRKY family transcription factor family protein | chr4:13437298-13440693 REVERSE LENGTH=557
	IRGSP	Os07t0583700-01	WRKY transcription factor 78.
	nr	gb|EAZ04490.1|	hypothetical protein OsI_26641 [Oryza sativa Indica Group]
CL1629.Contig4_A.roylei_Root	TAIR	AT4G26640.2	| Symbols: WRKY20, AtWRKY20 | WRKY family transcription factor family protein | chr4:13437298-13440693 REVERSE LENGTH=557
	IRGSP	Os07t0583700-01	WRKY transcription factor 78.
	nr	gb|AFZ45987.1|	WRKYS2 transcription factor, partial [Oryza sativa Japonica Group]
CL1629.Contig5_A.roylei_Root	TAIR	AT4G26640.2	| Symbols: WRKY20, AtWRKY20 | WRKY family transcription factor family protein | chr4:13437298-13440693 REVERSE LENGTH=557
	IRGSP	Os07t0583700-01	WRKY transcription factor 78.
	nr	gb|AFZ45987.1|	WRKYS2 transcription factor, partial [Oryza sativa Japonica Group]
CL1925.Contig2_A.roylei_Root	TAIR	AT2G40750.1	| Symbols: WRKY54, ATWRKY54 | WRKY DNA-binding protein 54 | chr2:17000636-17002354 REVERSE LENGTH=346
	IRGSP	Os05t0478400-00	Similar to WRKY transcription factor 48.
	nr	gb|EOY04438.1|	WRKY DNA-binding protein 70, putative isoform 1 [Theobroma cacao]
CL1925.Contig3_A.roylei_Root	TAIR	AT2G40750.1	| Symbols: WRKY54, ATWRKY54 | WRKY DNA-binding protein 54 | chr2:17000636-17002354 REVERSE LENGTH=346
	IRGSP	Os05t0478400-00	Similar to WRKY transcription factor 48.
	nr	ref|XP_003559789.1|	PREDICTED: probable WRKY transcription factor 70-like [Brachypodium distachyon]
CL1951.Contig1_A.roylei_Root	TAIR	AT2G38470.1	| Symbols: WRKY33, ATWRKY33 | WRKY DNA-binding protein 33 | chr2:16108476-16110539 FORWARD LENGTH=519
	IRGSP	Os01t0826400-01	WRKY transcription factor 24 (WRKY24).
	nr	gb|EMJ09489.1|	hypothetical protein PRUPE_ppa003333mg [Prunus persica]
CL1951.Contig2_A.roylei_Root	TAIR	AT2G38470.1	| Symbols: WRKY33, ATWRKY33 | WRKY DNA-binding protein 33 | chr2:16108476-16110539 FORWARD LENGTH=519
	IRGSP	Os01t0826400-01	WRKY transcription factor 24 (WRKY24).
	nr	gb|EOY34631.1|	WRKY DNA-binding protein 33 isoform 1 [Theobroma cacao]
CL1951.Contig3_A.roylei_Root	TAIR	AT2G38470.1	| Symbols: WRKY33, ATWRKY33 | WRKY DNA-binding protein 33 | chr2:16108476-16110539 FORWARD LENGTH=519
	IRGSP	Os01t0826400-01	WRKY transcription factor 24 (WRKY24).
	nr	gb|EMJ09489.1|	hypothetical protein PRUPE_ppa003333mg [Prunus persica]
CL1951.Contig4_A.roylei_Root	TAIR	AT2G38470.1	| Symbols: WRKY33, ATWRKY33 | WRKY DNA-binding protein 33 | chr2:16108476-16110539 FORWARD LENGTH=519
	IRGSP	Os01t0826400-01	WRKY transcription factor 24 (WRKY24).
	nr	gb|EMJ09489.1|	hypothetical protein PRUPE_ppa003333mg [Prunus persica]
CL2245.Contig1_A.roylei_Root	TAIR	AT1G29280.1	| Symbols: WRKY65, ATWRKY65 | WRKY DNA-binding protein 65 | chr1:10236589-10237467 FORWARD LENGTH=259
	IRGSP	Os01t0750100-03	Similar to WRKY13 transcription factor.
	nr	ref|XP_002269267.1|	PREDICTED: probable WRKY transcription factor 65 [Vitis vinifera] gi|297740534|emb|CBI30716.3| unnamed protein product [Vitis vinifera]
CL2245.Contig2_A.roylei_Root	TAIR	AT1G29280.1	| Symbols: WRKY65, ATWRKY65 | WRKY DNA-binding protein 65 | chr1:10236589-10237467 FORWARD LENGTH=259
	IRGSP	Os01t0750100-03	Similar to WRKY13 transcription factor.
	nr	ref|XP_002269267.1|	PREDICTED: probable WRKY transcription factor 65 [Vitis vinifera] gi|297740534|emb|CBI30716.3| unnamed protein product [Vitis vinifera]
CL2245.Contig3_A.roylei_Root	TAIR	AT1G29280.1	| Symbols: WRKY65, ATWRKY65 | WRKY DNA-binding protein 65 | chr1:10236589-10237467 FORWARD LENGTH=259
	IRGSP	Os01t0730700-01	WRKY transcription factor 14 (WRKY14).
	nr	ref|XP_002269267.1|	PREDICTED: probable WRKY transcription factor 65 [Vitis vinifera] gi|297740534|emb|CBI30716.3| unnamed protein product [Vitis vinifera]
CL2245.Contig4_A.roylei_Root	TAIR	AT1G29280.1	| Symbols: WRKY65, ATWRKY65 | WRKY DNA-binding protein 65 | chr1:10236589-10237467 FORWARD LENGTH=259
	IRGSP	Os01t0750100-03	Similar to WRKY13 transcription factor.
	nr	ref|XP_002269267.1|	PREDICTED: probable WRKY transcription factor 65 [Vitis vinifera] gi|297740534|emb|CBI30716.3| unnamed protein product [Vitis vinifera]
CL2552.Contig2_A.roylei_Root	TAIR	AT2G38470.1	| Symbols: WRKY33, ATWRKY33 | WRKY DNA-binding protein 33 | chr2:16108476-16110539 FORWARD LENGTH=519
	IRGSP	Os01t0826400-01	WRKY transcription factor 24 (WRKY24).
	nr	gb|EOY34631.1|	WRKY DNA-binding protein 33 isoform 1 [Theobroma cacao]
CL2552.Contig3_A.roylei_Root	TAIR	AT2G38470.1	| Symbols: WRKY33, ATWRKY33 | WRKY DNA-binding protein 33 | chr2:16108476-16110539 FORWARD LENGTH=519
	IRGSP	Os01t0826400-01	WRKY transcription factor 24 (WRKY24).
	nr	gb|ACY39878.1|	WRKY transcription factor 7 [Parajubaea cocoides]
CL3429.Contig1_A.roylei_Root	TAIR	AT5G13080.1	| Symbols: WRKY75, ATWRKY75 | WRKY DNA-binding protein 75 | chr5:4149928-4151019 REVERSE LENGTH=145
	IRGSP	--No_Hits--
	nr	--No_Hits--
CL3893.Contig1_A.roylei_Root	TAIR	AT1G66550.2	| Symbols: WRKY67, ATWRKY67 | WRKY DNA-binding protein 67 | chr1:24828537-24829589 FORWARD LENGTH=249
	IRGSP	Os12t0116400-00	Similar to WRKY DNA binding domain containing protein, expressed.
	nr	gb|ABA96294.1|	WRKY DNA binding domain containing protein, expressed [Oryza sativa Japonica Group] gi|125578297|gb|EAZ19443.1| hypothetical protein OsJ_35004 [Oryza sativa Japonica Group]
CL5182.Contig1_A.roylei_Root	TAIR	AT5G64810.1	| Symbols: WRKY51, ATWRKY51 | WRKY DNA-binding protein 51 | chr5:25908415-25909687 FORWARD LENGTH=194
	IRGSP	Os05t0537100-00	WRKY transcription factor 10.
	nr	gb|AFW78902.1|	putative WRKY DNA-binding domain superfamily protein [Zea mays]
CL5182.Contig2_A.roylei_Root	TAIR	AT5G64810.1	| Symbols: WRKY51, ATWRKY51 | WRKY DNA-binding protein 51 | chr5:25908415-25909687 FORWARD LENGTH=194
	IRGSP	Os05t0537100-00	WRKY transcription factor 10.
	nr	gb|EAY98838.1|	hypothetical protein OsI_20783 [Oryza sativa Indica Group]
CL5182.Contig3_A.roylei_Root	TAIR	AT5G64810.1	| Symbols: WRKY51, ATWRKY51 | WRKY DNA-binding protein 51 | chr5:25908415-25909687 FORWARD LENGTH=194
	IRGSP	Os05t0537100-00	WRKY transcription factor 10.
	nr	gb|EAY98838.1|	hypothetical protein OsI_20783 [Oryza sativa Indica Group]
CL5473.Contig1_A.roylei_Root	TAIR	AT1G64000.1	| Symbols: WRKY56, ATWRKY56 | WRKY DNA-binding protein 56 | chr1:23747434-23748883 FORWARD LENGTH=195
	IRGSP	Os01t0734000-01	Similar to WRKY DNA binding protein.
	nr	ref|NP_001044163.1|	Os01g0734000 [Oryza sativa Japonica Group] gi|15624020|dbj|BAB68074.1| putative WRKY DNA binding protein [Oryza sativa Japonica Group] gi|20161004|dbj|BAB89937.1| putative WRKY DNA binding protein [Oryza sativa Japonica Group] gi|33519178|gb|AAQ20904.1| WRKY4 [Oryza sativa Japonica Group] gi|46394300|tpg|DAA05088.1| TPA_inf: WRKY transcription factor 23 [Oryza sativa (japonica cultivar-group)] gi…
CL5473.Contig2_A.roylei_Root	TAIR	AT1G64000.1	| Symbols: WRKY56, ATWRKY56 | WRKY DNA-binding protein 56 | chr1:23747434-23748883 FORWARD LENGTH=195
	IRGSP	Os01t0734000-01	Similar to WRKY DNA binding protein.
	nr	ref|NP_001044163.1|	Os01g0734000 [Oryza sativa Japonica Group] gi|15624020|dbj|BAB68074.1| putative WRKY DNA binding protein [Oryza sativa Japonica Group] gi|20161004|dbj|BAB89937.1| putative WRKY DNA binding protein [Oryza sativa Japonica Group] gi|33519178|gb|AAQ20904.1| WRKY4 [Oryza sativa Japonica Group] gi|46394300|tpg|DAA05088.1| TPA_inf: WRKY transcription factor 23 [Oryza sativa (japonica cultivar-group)] gi…
CL5514.Contig2_A.roylei_Root	TAIR	AT2G38470.1	| Symbols: WRKY33, ATWRKY33 | WRKY DNA-binding protein 33 | chr2:16108476-16110539 FORWARD LENGTH=519
	IRGSP	Os05t0343400-01	WRKY transcription factor 53 (Transcription factor WRKY12).
	nr	gb|AAC31956.1|	zinc finger protein [Pimpinella brachycarpa]
CL5514.Contig3_A.roylei_Root	TAIR	AT2G38470.1	| Symbols: WRKY33, ATWRKY33 | WRKY DNA-binding protein 33 | chr2:16108476-16110539 FORWARD LENGTH=519
	IRGSP	--No_Hits--
	nr	--No_Hits--
CL5748.Contig1_A.roylei_Root	TAIR	AT3G04670.2	| Symbols: WRKY39, ATWRKY39 | WRKY DNA-binding protein 39 | chr3:1266737-1267691 REVERSE LENGTH=290
	IRGSP	Os03t0741400-01	Similar to SUSIBA2.
	nr	gb|AAL75474.1|	DNA binding protein [Elaeis oleifera]
CL5748.Contig2_A.roylei_Root	TAIR	AT3G04670.2	| Symbols: WRKY39, ATWRKY39 | WRKY DNA-binding protein 39 | chr3:1266737-1267691 REVERSE LENGTH=290
	IRGSP	Os03t0741400-01	Similar to SUSIBA2.
	nr	gb|AAL75474.1|	DNA binding protein [Elaeis oleifera]
CL6062.Contig1_A.roylei_Root	TAIR	AT4G11070.1	| Symbols: WRKY41, AtWRKY41 | WRKY family transcription factor | chr4:6759303-6760763 FORWARD LENGTH=313
	IRGSP	Os08t0386200-01	WRKY transcription factor 69.
	nr	ref|XP_002302620.1|	predicted protein [Populus trichocarpa] gi|222844346|gb|EEE81893.1| predicted protein [Populus trichocarpa]
CL6062.Contig2_A.roylei_Root	TAIR	AT4G11070.2	| Symbols: WRKY41, AtWRKY41 | WRKY family transcription factor | chr4:6759303-6760763 FORWARD LENGTH=281
	IRGSP	Os06t0158100-00	Similar to WRKY transcription factor 63.
	nr	gb|ACV92023.1|	WRKY transcription factor 21 [(Populus tomentosa x P. bolleana) x P. tomentosa]
CL6080.Contig1_A.roylei_Root	TAIR	AT1G04640.2	| Symbols: LIP2 | lipoyltransferase 2 | chr1:1292541-1293248 FORWARD LENGTH=235
	IRGSP	Os03t0321800-02	Similar to WRKY transcription factor 55.
	nr	ref|XP_002525976.1|	lipoate-protein ligase B, putative [Ricinus communis] gi|223534708|gb|EEF36400.1| lipoate-protein ligase B, putative [Ricinus communis]
CL6080.Contig2_A.roylei_Root	TAIR	AT1G04640.2	| Symbols: LIP2 | lipoyltransferase 2 | chr1:1292541-1293248 FORWARD LENGTH=235
	IRGSP	Os03t0321800-02	Similar to WRKY transcription factor 55.
	nr	ref|XP_002525976.1|	lipoate-protein ligase B, putative [Ricinus communis] gi|223534708|gb|EEF36400.1| lipoate-protein ligase B, putative [Ricinus communis]
CL6116.Contig1_A.roylei_Root	TAIR	AT2G38470.1	| Symbols: WRKY33, ATWRKY33 | WRKY DNA-binding protein 33 | chr2:16108476-16110539 FORWARD LENGTH=519
	IRGSP	Os05t0343400-01	WRKY transcription factor 53 (Transcription factor WRKY12).
	nr	gb|EMJ06226.1|	hypothetical protein PRUPE_ppa004009mg [Prunus persica]
CL6116.Contig2_A.roylei_Root	TAIR	AT2G38470.1	| Symbols: WRKY33, ATWRKY33 | WRKY DNA-binding protein 33 | chr2:16108476-16110539 FORWARD LENGTH=519
	IRGSP	Os05t0343400-01	WRKY transcription factor 53 (Transcription factor WRKY12).
	nr	gb|EMJ06226.1|	hypothetical protein PRUPE_ppa004009mg [Prunus persica]
CL6701.Contig1_A.roylei_Root	TAIR	AT5G15130.1	| Symbols: WRKY72, ATWRKY72 | WRKY DNA-binding protein 72 | chr5:4904426-4906879 FORWARD LENGTH=548
	IRGSP	Os06t0146250-00	Similar to WRKY transcription factor 73.
	nr	gb|EOY21754.1|	WRKY DNA-binding protein 72, putative [Theobroma cacao]
CL6701.Contig2_A.roylei_Root	TAIR	AT1G18860.1	| Symbols: WRKY61, ATWRKY61 | WRKY DNA-binding protein 61 | chr1:6509494-6511209 FORWARD LENGTH=480
	IRGSP	--No_Hits--
	nr	ref|XP_002517481.1|	WRKY transcription factor, putative [Ricinus communis] gi|223543492|gb|EEF45023.1| WRKY transcription factor, putative [Ricinus communis]
CL693.Contig1_A.roylei_Root	TAIR	AT1G80840.1	| Symbols: WRKY40, ATWRKY40 | WRKY DNA-binding protein 40 | chr1:30383834-30385356 FORWARD LENGTH=302
	IRGSP	Os06t0649000-02	Similar to WRKY transcription factor 28.
	nr	gb|EOY26053.1|	WRKY DNA-binding protein 40, putative isoform 2 [Theobroma cacao]
CL693.Contig2_A.roylei_Root	TAIR	AT1G80840.1	| Symbols: WRKY40, ATWRKY40 | WRKY DNA-binding protein 40 | chr1:30383834-30385356 FORWARD LENGTH=302
	IRGSP	Os06t0649000-02	Similar to WRKY transcription factor 28.
	nr	gb|EOY26053.1|	WRKY DNA-binding protein 40, putative isoform 2 [Theobroma cacao]
CL693.Contig3_A.roylei_Root	TAIR	AT1G80840.1	| Symbols: WRKY40, ATWRKY40 | WRKY DNA-binding protein 40 | chr1:30383834-30385356 FORWARD LENGTH=302
	IRGSP	Os06t0649000-02	Similar to WRKY transcription factor 28.
	nr	gb|EOY26053.1|	WRKY DNA-binding protein 40, putative isoform 2 [Theobroma cacao]
CL693.Contig4_A.roylei_Root	TAIR	AT1G80840.1	| Symbols: WRKY40, ATWRKY40 | WRKY DNA-binding protein 40 | chr1:30383834-30385356 FORWARD LENGTH=302
	IRGSP	Os06t0649000-02	Similar to WRKY transcription factor 28.
	nr	gb|EOY26053.1|	WRKY DNA-binding protein 40, putative isoform 2 [Theobroma cacao]
CL693.Contig5_A.roylei_Root	TAIR	--No_Hits--
	IRGSP	Os06t0649000-02	Similar to WRKY transcription factor 28.
	nr	ref|XP_002303852.1|	predicted protein [Populus trichocarpa] gi|118487935|gb|ABK95789.1| unknown [Populus trichocarpa] gi|222841284|gb|EEE78831.1| predicted protein [Populus trichocarpa]
CL7327.Contig1_A.roylei_Root	TAIR	AT1G80590.1	| Symbols: WRKY66, ATWRKY66 | WRKY DNA-binding protein 66 | chr1:30296210-30297156 REVERSE LENGTH=235
	IRGSP	Os03t0321700-01	Similar to WRKY transcription factor 55.
	nr	gb|AFW64632.1|	putative WRKY DNA-binding domain superfamily protein [Zea mays]
CL7365.Contig1_A.roylei_Root	TAIR	AT5G56270.1	| Symbols: WRKY2, ATWRKY2 | WRKY DNA-binding protein 2 | chr5:22780816-22783137 FORWARD LENGTH=687
	IRGSP	Os08t0499300-01	WRKY transcription factor 30.
	nr	emb|CBI39865.3|	unnamed protein product [Vitis vinifera]
CL7365.Contig2_A.roylei_Root	TAIR	AT5G56270.1	| Symbols: WRKY2, ATWRKY2 | WRKY DNA-binding protein 2 | chr5:22780816-22783137 FORWARD LENGTH=687
	IRGSP	Os04t0471700-00	Similar to WRKY10 (WRKY transcription factor 35).
	nr	gb|AFW58561.1|	putative WRKY DNA-binding domain superfamily protein [Zea mays]
Unigene10361_A.roylei_Root	TAIR	AT5G56270.1	| Symbols: WRKY2, ATWRKY2 | WRKY DNA-binding protein 2 | chr5:22780816-22783137 FORWARD LENGTH=687
	IRGSP	Os04t0471700-00	Similar to WRKY10 (WRKY transcription factor 35).
	nr	ref|XP_004162794.1|	PREDICTED: LOW QUALITY PROTEIN: probable WRKY transcription factor 2-like, partial [Cucumis sativus]
Unigene10616_A.roylei_Root	TAIR	AT3G56400.1	| Symbols: WRKY70, ATWRKY70 | WRKY DNA-binding protein 70 | chr3:20909082-20910409 REVERSE LENGTH=294
	IRGSP	Os05t0478700-00	Hypothetical conserved gene.
	nr	ref|XP_002456546.1|	hypothetical protein SORBIDRAFT_03g038170 [Sorghum bicolor] gi|241928521|gb|EES01666.1| hypothetical protein SORBIDRAFT_03g038170 [Sorghum bicolor]
Unigene10937_A.roylei_Root	TAIR	AT3G29185.2	| Symbols: | Domain of unknown function (DUF3598) | chr3:11155092-11157207 REVERSE LENGTH=411
	IRGSP	Os03t0758900-01	Similar to predicted protein.
	nr	gb|AEO31475.1|	WRKY transcription factor 11-2 [Dimocarpus longan]
Unigene12065_A.roylei_Root	TAIR	AT4G22070.1	| Symbols: WRKY31, ATWRKY31 | WRKY DNA-binding protein 31 | chr4:11691381-11694234 REVERSE LENGTH=538
	IRGSP	Os01t0246700-01	Similar to WRKY transcription factor 1.
	nr	ref|XP_002518444.1|	WRKY transcription factor, putative [Ricinus communis] gi|223542289|gb|EEF43831.1| WRKY transcription factor, putative [Ricinus communis]
Unigene13329_A.roylei_Root	TAIR	AT3G56400.1	| Symbols: WRKY70, ATWRKY70 | WRKY DNA-binding protein 70 | chr3:20909082-20910409 REVERSE LENGTH=294
	IRGSP	Os11t0116900-01	Similar to WRKY DNA binding domain containing protein, expressed.
	nr	ref|NP_001065590.1|	Os11g0116900 [Oryza sativa Japonica Group] gi|113644294|dbj|BAF27435.1| Os11g0116900, partial [Oryza sativa Japonica Group]
Unigene13330_A.roylei_Root	TAIR	--No_Hits--
	IRGSP	Os11t0116900-01	Similar to WRKY DNA binding domain containing protein, expressed.
	nr	--No_Hits--
Unigene13581_A.roylei_Root	TAIR	AT4G31550.2	| Symbols: WRKY11, ATWRKY11 | WRKY DNA-binding protein 11 | chr4:15290065-15291458 REVERSE LENGTH=324
	IRGSP	Os04t0287400-01	Similar to WRKY transcription factor 51.
	nr	emb|CBI17876.3|	unnamed protein product [Vitis vinifera]
Unigene14563_A.roylei_Root	TAIR	AT3G56400.1	| Symbols: WRKY70, ATWRKY70 | WRKY DNA-binding protein 70 | chr3:20909082-20910409 REVERSE LENGTH=294
	IRGSP	Os05t0322900-01	Similar to WRKY transcription factor 45.
	nr	ref|XP_003566383.1|	PREDICTED: uncharacterized protein LOC100836752 [Brachypodium distachyon]
Unigene14633_A.roylei_Root	TAIR	AT1G13960.2	| Symbols: WRKY4 | WRKY DNA-binding protein 4 | chr1:4776622-4779043 FORWARD LENGTH=487
	IRGSP	Os08t0499300-01	WRKY transcription factor 30.
	nr	ref|XP_003571606.1|	PREDICTED: probable WRKY transcription factor 4-like [Brachypodium distachyon]
Unigene14753_A.roylei_Root	TAIR	AT2G30590.1	| Symbols: WRKY21 | WRKY DNA-binding protein 21 | chr2:13033891-13035303 FORWARD LENGTH=380
	IRGSP	Os12t0597700-02	Similar to WRKY DNA binding domain containing protein, expressed.
	nr	ref|NP_001067197.1|	Os12g0597700 [Oryza sativa Japonica Group] gi|77556448|gb|ABA99244.1| WRKY DNA binding domain containing protein, expressed [Oryza sativa Japonica Group] gi|113649704|dbj|BAF30216.1| Os12g0597700 [Oryza sativa Japonica Group]
Unigene15256_A.roylei_Root	TAIR	AT4G23810.1	| Symbols: WRKY53, ATWRKY53 | WRKY family transcription factor | chr4:12392666-12393739 REVERSE LENGTH=324
	IRGSP	Os01t0656400-00	Similar to WRKY transcription factor 15.
	nr	ref|XP_002267793.2|	PREDICTED: probable WRKY transcription factor 53-like [Vitis vinifera] gi|302143686|emb|CBI22547.3| unnamed protein product [Vitis vinifera]
Unigene16607_A.roylei_Root	TAIR	AT1G62300.1	| Symbols: WRKY6, ATWRKY6 | WRKY family transcription factor | chr1:23016887-23019155 REVERSE LENGTH=553
	IRGSP	Os05t0137500-00	Similar to WRKY transcription factor 5.
	nr	ref|XP_002518444.1|	WRKY transcription factor, putative [Ricinus communis] gi|223542289|gb|EEF43831.1| WRKY transcription factor, putative [Ricinus communis]
Unigene17432_A.roylei_Root	TAIR	AT5G07100.1	| Symbols: WRKY26 | WRKY DNA-binding protein 26 | chr5:2204313-2205647 FORWARD LENGTH=309
	IRGSP	Os01t0826400-01	WRKY transcription factor 24 (WRKY24).
	nr	gb|AGJ52154.1|	WRKY transcription factor 08 [Jatropha curcas]
Unigene17557_A.roylei_Root	TAIR	AT2G37260.2	| Symbols: TTG2, ATWRKY44, WRKY44 | WRKY family transcription factor family protein | chr2:15645603-15646792 FORWARD LENGTH=347
	IRGSP	Os12t0507300-00	Similar to WRKY DNA binding domain containing protein, expressed.
	nr	ref|XP_004493932.1|	PREDICTED: WRKY transcription factor 44-like isoform X1 [Cicer arietinum] gi|502111011|ref|XP_004493933.1| PREDICTED: WRKY transcription factor 44-like isoform X2 [Cicer arietinum]
Unigene17558_A.roylei_Root	TAIR	--No_Hits--
	IRGSP	Os07t0583700-01	WRKY transcription factor 78.
	nr	--No_Hits--
Unigene18600_A.roylei_Root	TAIR	AT4G26440.1	| Symbols: WRKY34, ATWRKY34, MSP3 | WRKY DNA-binding protein 34 | chr4:13357596-13359550 REVERSE LENGTH=568
	IRGSP	Os01t0826400-01	WRKY transcription factor 24 (WRKY24).
	nr	gb|ACY24210.1|	WRKY transcription factor 7 [Attalea sp. Noblick 5517]
Unigene19375_A.roylei_Root	TAIR	AT4G22070.1	| Symbols: WRKY31, ATWRKY31 | WRKY DNA-binding protein 31 | chr4:11691381-11694234 REVERSE LENGTH=538
	IRGSP	Os05t0137500-00	Similar to WRKY transcription factor 5.
	nr	gb|EMJ18187.1|	hypothetical protein PRUPE_ppa002619mg [Prunus persica]
Unigene23245_A.roylei_Root	TAIR	AT5G64810.1	| Symbols: WRKY51, ATWRKY51 | WRKY DNA-binding protein 51 | chr5:25908415-25909687 FORWARD LENGTH=194
	IRGSP	Os05t0537100-00	WRKY transcription factor 10.
	nr	ref|XP_002440147.1|	hypothetical protein SORBIDRAFT_09g026830 [Sorghum bicolor] gi|241945432|gb|EES18577.1| hypothetical protein SORBIDRAFT_09g026830 [Sorghum bicolor]
Unigene24425_A.roylei_Root	TAIR	AT2G34830.1	| Symbols: WRKY35, MEE24, AtWRKY35 | WRKY DNA-binding protein 35 | chr2:14693839-14696378 REVERSE LENGTH=427
	IRGSP	Os04t0597300-01	Similar to WERKY protein (Fragment).
	nr	emb|CBI31090.3|	unnamed protein product [Vitis vinifera]
Unigene24426_A.roylei_Root	TAIR	AT2G34830.1	| Symbols: WRKY35, MEE24, AtWRKY35 | WRKY DNA-binding protein 35 | chr2:14693839-14696378 REVERSE LENGTH=427
	IRGSP	Os04t0597300-01	Similar to WERKY protein (Fragment).
	nr	ref|XP_004231651.1|	PREDICTED: LOW QUALITY PROTEIN: probable WRKY transcription factor 35-like [Solanum lycopersicum]
Unigene28359_A.roylei_Root	TAIR	AT1G80840.1	| Symbols: WRKY40, ATWRKY40 | WRKY DNA-binding protein 40 | chr1:30383834-30385356 FORWARD LENGTH=302
	IRGSP	Os06t0649000-02	Similar to WRKY transcription factor 28.
	nr	gb|ADU02585.1|	WRKY transcription factor 4 [Vitis vinifera]
Unigene28487_A.roylei_Root	TAIR	--No_Hits--
	IRGSP	Os05t0343400-01	WRKY transcription factor 53 (Transcription factor WRKY12).
	nr	gb|ABK95324.1|	unknown [Populus trichocarpa]
Unigene28923_A.roylei_Root	TAIR	AT5G49520.1	| Symbols: WRKY48, ATWRKY48 | WRKY DNA-binding protein 48 | chr5:20090890-20092867 FORWARD LENGTH=399
	IRGSP	Os05t0565900-00	DNA-binding WRKY domain containing protein.
	nr	ref|XP_002279385.1|	PREDICTED: probable WRKY transcription factor 48 [Vitis vinifera] gi|296083226|emb|CBI22862.3| unnamed protein product [Vitis vinifera]
Unigene29566_A.roylei_Root	TAIR	AT1G28280.2	| Symbols: | VQ motif-containing protein | chr1:9886297-9887395 REVERSE LENGTH=243
	IRGSP	Os01t0201250-00	Similar to DNA-binding WRKY.
	nr	ref|XP_004244236.1|	PREDICTED: uncharacterized protein LOC101257285 [Solanum lycopersicum]
Unigene30960_A.roylei_Root	TAIR	AT1G30650.1	| Symbols: WRKY14, ATWRKY14, AR411 | WRKY DNA-binding protein 14 | chr1:10868612-10870973 FORWARD LENGTH=430
	IRGSP	Os02t0265200-01	WRKY transcription factor 39.
	nr	ref|XP_004492798.1|	PREDICTED: WRKY transcription factor 22-like [Cicer arietinum]
Unigene34451_A.roylei_Root	TAIR	AT5G56270.1	| Symbols: WRKY2, ATWRKY2 | WRKY DNA-binding protein 2 | chr5:22780816-22783137 FORWARD LENGTH=687
	IRGSP	Os01t0826400-01	WRKY transcription factor 24 (WRKY24).
	nr	gb|EOY11828.1|	WRKY DNA-binding protein 2 isoform 3 [Theobroma cacao] gi|508719932|gb|EOY11829.1| WRKY DNA-binding protein 2 isoform 3 [Theobroma cacao]
Unigene36598_A.roylei_Root	TAIR	--No_Hits--
	IRGSP	Os02t0698800-01	WRKY transcription factor 66.
	nr	--No_Hits--
Unigene38587_A.roylei_Root	TAIR	--No_Hits--
	IRGSP	--No_Hits--
	nr	ref|XP_003526383.1|	PREDICTED: probable WRKY transcription factor 2 [Glycine max]
Unigene3905_A.roylei_Root	TAIR	AT1G68150.1	| Symbols: WRKY9, ATWRKY9 | WRKY DNA-binding protein 9 | chr1:25543970-25545615 FORWARD LENGTH=374
	IRGSP	Os02t0770500-00	Similar to WRKY transcription factor 32.
	nr	ref|XP_003573034.1|	PREDICTED: probable WRKY transcription factor 72-like [Brachypodium distachyon]
Unigene41180_A.roylei_Root	TAIR	AT1G68150.1	| Symbols: WRKY9, ATWRKY9 | WRKY DNA-binding protein 9 | chr1:25543970-25545615 FORWARD LENGTH=374
	IRGSP	Os02t0770500-00	Similar to WRKY transcription factor 32.
	nr	ref|NP_001234773.1|	WRKY72-like protein [Solanum lycopersicum] gi|300498296|gb|ADK23850.1| WRKY72-like protein [Solanum lycopersicum]
Unigene6825_A.roylei_Root	TAIR	AT1G13960.1	| Symbols: WRKY4 | WRKY DNA-binding protein 4 | chr1:4776622-4779043 FORWARD LENGTH=514
	IRGSP	Os12t0507300-00	Similar to WRKY DNA binding domain containing protein, expressed.
	nr	gb|AAT46067.1|	DNA binding protein WRKY2 [Vitis vinifera]
Unigene7810_A.roylei_Root	TAIR	AT2G34830.1	| Symbols: WRKY35, MEE24, AtWRKY35 | WRKY DNA-binding protein 35 | chr2:14693839-14696378 REVERSE LENGTH=427
	IRGSP	Os02t0698800-01	WRKY transcription factor 66.
	nr	emb|CBI31090.3|	unnamed protein product [Vitis vinifera]
Unigene8587_A.roylei_Root	TAIR	AT2G34830.1	| Symbols: WRKY35, MEE24, AtWRKY35 | WRKY DNA-binding protein 35 | chr2:14693839-14696378 REVERSE LENGTH=427
	IRGSP	Os04t0597300-01	Similar to WERKY protein (Fragment).
	nr	emb|CBI31090.3|	unnamed protein product [Vitis vinifera]
Unigene8711_A.roylei_Root	TAIR	AT5G52830.1	| Symbols: WRKY27, ATWRKY27 | WRKY DNA-binding protein 27 | chr5:21410996-21412218 FORWARD LENGTH=348
	IRGSP	Os02t0265200-01	WRKY transcription factor 39.
	nr	ref|NP_001237508.1|	transcription factor [Glycine max] gi|166203223|gb|ABY84652.1| transcription factor [Glycine max]
CL2393.Contig1_FFStem	TAIR	AT5G07100.1	| Symbols: WRKY26 | WRKY DNA-binding protein 26 | chr5:2204313-2205647 FORWARD LENGTH=309
	IRGSP	Os05t0343400-01	WRKY transcription factor 53 (Transcription factor WRKY12).
	nr	dbj|BAA06278.1|	SPF1 protein [Ipomoea batatas]
CL2815.Contig1_FFStem	TAIR	AT4G26640.2	| Symbols: WRKY20, AtWRKY20 | WRKY family transcription factor family protein | chr4:13437298-13440693 REVERSE LENGTH=557
	IRGSP	Os07t0583700-01	WRKY transcription factor 78.
	nr	gb|EAZ04490.1|	hypothetical protein OsI_26641 [Oryza sativa Indica Group]
CL2815.Contig2_FFStem	TAIR	AT4G26640.2	| Symbols: WRKY20, AtWRKY20 | WRKY family transcription factor family protein | chr4:13437298-13440693 REVERSE LENGTH=557
	IRGSP	Os07t0583700-01	WRKY transcription factor 78.
	nr	ref|XP_003562813.1|	PREDICTED: probable WRKY transcription factor 20-like isoform 2 [Brachypodium distachyon]
CL4317.Contig1_FFStem	TAIR	AT3G29185.1	| Symbols: | Domain of unknown function (DUF3598) | chr3:11155092-11157207 REVERSE LENGTH=396
	IRGSP	Os03t0758900-01	Similar to predicted protein.
	nr	gb|AEO31475.1|	WRKY transcription factor 11-2 [Dimocarpus longan]
CL4317.Contig2_FFStem	TAIR	AT3G29185.1	| Symbols: | Domain of unknown function (DUF3598) | chr3:11155092-11157207 REVERSE LENGTH=396
	IRGSP	Os03t0758900-01	Similar to predicted protein.
	nr	gb|AEO31475.1|	WRKY transcription factor 11-2 [Dimocarpus longan]
CL4317.Contig3_FFStem	TAIR	AT3G29185.1	| Symbols: | Domain of unknown function (DUF3598) | chr3:11155092-11157207 REVERSE LENGTH=396
	IRGSP	Os03t0758900-01	Similar to predicted protein.
	nr	gb|AEO31475.1|	WRKY transcription factor 11-2 [Dimocarpus longan]
Unigene11916_FFStem	TAIR	AT1G29280.1	| Symbols: WRKY65, ATWRKY65 | WRKY DNA-binding protein 65 | chr1:10236589-10237467 FORWARD LENGTH=259
	IRGSP	Os01t0730700-01	WRKY transcription factor 14 (WRKY14).
	nr	ref|XP_002269267.1|	PREDICTED: probable WRKY transcription factor 65 [Vitis vinifera] gi|297740534|emb|CBI30716.3| unnamed protein product [Vitis vinifera]
Unigene13015_FFStem	TAIR	AT1G68150.1	| Symbols: WRKY9, ATWRKY9 | WRKY DNA-binding protein 9 | chr1:25543970-25545615 FORWARD LENGTH=374
	IRGSP	Os02t0770500-00	Similar to WRKY transcription factor 32.
	nr	ref|NP_001234773.1|	WRKY72-like protein [Solanum lycopersicum] gi|300498296|gb|ADK23850.1| WRKY72-like protein [Solanum lycopersicum]
Unigene13081_FFStem	TAIR	AT2G30590.1	| Symbols: WRKY21 | WRKY DNA-binding protein 21 | chr2:13033891-13035303 FORWARD LENGTH=380
	IRGSP	Os12t0597700-01	Similar to WRKY2 (Fragment).
	nr	emb|CBI35175.3|	unnamed protein product [Vitis vinifera]
Unigene14278_FFStem	TAIR	AT2G03340.1	| Symbols: WRKY3 | WRKY DNA-binding protein 3 | chr2:1014724-1016936 REVERSE LENGTH=513
	IRGSP	Os12t0507300-00	Similar to WRKY DNA binding domain containing protein, expressed.
	nr	gb|AAT46067.1|	DNA binding protein WRKY2 [Vitis vinifera]
Unigene17108_FFStem	TAIR	AT5G56270.1	| Symbols: WRKY2, ATWRKY2 | WRKY DNA-binding protein 2 | chr5:22780816-22783137 FORWARD LENGTH=687
	IRGSP	Os09t0481700-02	SUSIBA2-like (WRKY transcription factor 80).
	nr	gb|EOY11828.1|	WRKY DNA-binding protein 2 isoform 3 [Theobroma cacao] gi|508719932|gb|EOY11829.1| WRKY DNA-binding protein 2 isoform 3 [Theobroma cacao]
Unigene18822_FFStem	TAIR	--No_Hits--
	IRGSP	Os05t0343400-01	WRKY transcription factor 53 (Transcription factor WRKY12).
	nr	dbj|BAA06278.1|	SPF1 protein [Ipomoea batatas]
Unigene20888_FFStem	TAIR	AT5G56270.1	| Symbols: WRKY2, ATWRKY2 | WRKY DNA-binding protein 2 | chr5:22780816-22783137 FORWARD LENGTH=687
	IRGSP	Os04t0471700-00	Similar to WRKY10 (WRKY transcription factor 35).
	nr	emb|CBI39865.3|	unnamed protein product [Vitis vinifera]
Unigene21389_FFStem	TAIR	AT5G56270.1	| Symbols: WRKY2, ATWRKY2 | WRKY DNA-binding protein 2 | chr5:22780816-22783137 FORWARD LENGTH=687
	IRGSP	Os07t0583700-01	WRKY transcription factor 78.
	nr	emb|CBI39865.3|	unnamed protein product [Vitis vinifera]
Unigene21491_FFStem	TAIR	AT2G34830.1	| Symbols: WRKY35, MEE24, AtWRKY35 | WRKY DNA-binding protein 35 | chr2:14693839-14696378 REVERSE LENGTH=427
	IRGSP	Os04t0597300-01	Similar to WERKY protein (Fragment).
	nr	gb|EOY25617.1|	WRKY DNA-binding protein 14, putative [Theobroma cacao]
Unigene23385_FFStem	TAIR	AT5G56270.1	| Symbols: WRKY2, ATWRKY2 | WRKY DNA-binding protein 2 | chr5:22780816-22783137 FORWARD LENGTH=687
	IRGSP	Os08t0499300-01	WRKY transcription factor 30.
	nr	emb|CBI39865.3|	unnamed protein product [Vitis vinifera]
Unigene23386_FFStem	TAIR	AT5G56270.1	| Symbols: WRKY2, ATWRKY2 | WRKY DNA-binding protein 2 | chr5:22780816-22783137 FORWARD LENGTH=687
	IRGSP	Os09t0481700-02	SUSIBA2-like (WRKY transcription factor 80).
	nr	gb|AGJ52156.1|	WRKY transcription factor 11 [Jatropha curcas]
Unigene24414_FFStem	TAIR	AT2G38470.1	| Symbols: WRKY33, ATWRKY33 | WRKY DNA-binding protein 33 | chr2:16108476-16110539 FORWARD LENGTH=519
	IRGSP	Os01t0826400-01	WRKY transcription factor 24 (WRKY24).
	nr	gb|EOY34631.1|	WRKY DNA-binding protein 33 isoform 1 [Theobroma cacao]
Unigene24961_FFStem	TAIR	AT3G56400.1	| Symbols: WRKY70, ATWRKY70 | WRKY DNA-binding protein 70 | chr3:20909082-20910409 REVERSE LENGTH=294
	IRGSP	Os05t0322900-01	Similar to WRKY transcription factor 45.
	nr	ref|XP_003566383.1|	PREDICTED: uncharacterized protein LOC100836752 [Brachypodium distachyon]
Unigene26019_FFStem	TAIR	AT1G80840.1	| Symbols: WRKY40, ATWRKY40 | WRKY DNA-binding protein 40 | chr1:30383834-30385356 FORWARD LENGTH=302
	IRGSP	Os06t0649000-02	Similar to WRKY transcription factor 28.
	nr	gb|ADU02585.1|	WRKY transcription factor 4 [Vitis vinifera]
Unigene30129_FFStem	TAIR	AT5G49520.1	| Symbols: WRKY48, ATWRKY48 | WRKY DNA-binding protein 48 | chr5:20090890-20092867 FORWARD LENGTH=399
	IRGSP	Os05t0565900-00	DNA-binding WRKY domain containing protein.
	nr	ref|XP_002279385.1|	PREDICTED: probable WRKY transcription factor 48 [Vitis vinifera] gi|296083226|emb|CBI22862.3| unnamed protein product [Vitis vinifera]
Unigene31573_FFStem	TAIR	AT4G11070.2	| Symbols: WRKY41, AtWRKY41 | WRKY family transcription factor | chr4:6759303-6760763 FORWARD LENGTH=281
	IRGSP	Os08t0386200-01	WRKY transcription factor 69.
	nr	ref|XP_002509941.1|	hypothetical protein RCOM_1691430 [Ricinus communis] gi|223549840|gb|EEF51328.1| hypothetical protein RCOM_1691430 [Ricinus communis]
Unigene33514_FFStem	TAIR	AT1G04640.2	| Symbols: LIP2 | lipoyltransferase 2 | chr1:1292541-1293248 FORWARD LENGTH=235
	IRGSP	Os03t0321800-02	Similar to WRKY transcription factor 55.
	nr	ref|XP_002525976.1|	lipoate-protein ligase B, putative [Ricinus communis] gi|223534708|gb|EEF36400.1| lipoate-protein ligase B, putative [Ricinus communis]
Unigene4440_FFStem	TAIR	AT1G13960.2	| Symbols: WRKY4 | WRKY DNA-binding protein 4 | chr1:4776622-4779043 FORWARD LENGTH=487
	IRGSP	Os08t0499300-01	WRKY transcription factor 30.
	nr	ref|XP_003571606.1|	PREDICTED: probable WRKY transcription factor 4-like [Brachypodium distachyon]
Unigene4468_FFStem	TAIR	AT3G56400.1	| Symbols: WRKY70, ATWRKY70 | WRKY DNA-binding protein 70 | chr3:20909082-20910409 REVERSE LENGTH=294
	IRGSP	Os11t0116900-01	Similar to WRKY DNA binding domain containing protein, expressed.
	nr	gb|EMT28936.1|	WRKY transcription factor 55 [Aegilops tauschii]
Unigene4839_FFStem	TAIR	AT4G11070.1	| Symbols: WRKY41, AtWRKY41 | WRKY family transcription factor | chr4:6759303-6760763 FORWARD LENGTH=313
	IRGSP	Os01t0656400-00	Similar to WRKY transcription factor 15.
	nr	gb|EOY23457.1|	WRKY DNA-binding protein 30, putative [Theobroma cacao]
Unigene5590_FFStem	TAIR	AT4G31550.2	| Symbols: WRKY11, ATWRKY11 | WRKY DNA-binding protein 11 | chr4:15290065-15291458 REVERSE LENGTH=324
	IRGSP	Os04t0287400-01	Similar to WRKY transcription factor 51.
	nr	emb|CBI17876.3|	unnamed protein product [Vitis vinifera]
Unigene593_FFStem	TAIR	AT5G64810.1	| Symbols: WRKY51, ATWRKY51 | WRKY DNA-binding protein 51 | chr5:25908415-25909687 FORWARD LENGTH=194
	IRGSP	Os05t0537100-00	WRKY transcription factor 10.
	nr	gb|AFW78902.1|	putative WRKY DNA-binding domain superfamily protein [Zea mays]
Unigene6063_FFStem	TAIR	AT1G28280.2	| Symbols: | VQ motif-containing protein | chr1:9886297-9887395 REVERSE LENGTH=243
	IRGSP	Os01t0201250-00	Similar to DNA-binding WRKY.
	nr	ref|XP_004244236.1|	PREDICTED: uncharacterized protein LOC101257285 [Solanum lycopersicum]
Unigene6641_FFStem	TAIR	AT2G44745.1	| Symbols: | WRKY family transcription factor | chr2:18447482-18449004 REVERSE LENGTH=218
	IRGSP	Os04t0545000-01	Similar to WRKY transcription factor 34.
	nr	ref|XP_003521060.1|	PREDICTED: probable WRKY transcription factor 12-like [Glycine max]
Unigene8569_FFStem	TAIR	AT5G26170.1	| Symbols: WRKY50, ATWRKY50 | WRKY DNA-binding protein 50 | chr5:9147176-9148128 REVERSE LENGTH=173
	IRGSP	Os05t0537100-00	WRKY transcription factor 10.
	nr	ref|XP_004501445.1|	PREDICTED: probable WRKY transcription factor 50-like [Cicer arietinum]
Unigene887_FFStem	TAIR	AT1G80840.1	| Symbols: WRKY40, ATWRKY40 | WRKY DNA-binding protein 40 | chr1:30383834-30385356 FORWARD LENGTH=302
	IRGSP	Os06t0649000-02	Similar to WRKY transcription factor 28.
	nr	gb|EOY26053.1|	WRKY DNA-binding protein 40, putative isoform 2 [Theobroma cacao]
CL1603.Contig1_FF_5AStem	TAIR	AT5G15130.1	| Symbols: WRKY72, ATWRKY72 | WRKY DNA-binding protein 72 | chr5:4904426-4906879 FORWARD LENGTH=548
	IRGSP	Os06t0146250-00	Similar to WRKY transcription factor 73.
	nr	gb|EOY03394.1|	WRKY DNA-binding protein 72, putative [Theobroma cacao]
CL2189.Contig1_FF_5AStem	TAIR	AT1G80840.1	| Symbols: WRKY40, ATWRKY40 | WRKY DNA-binding protein 40 | chr1:30383834-30385356 FORWARD LENGTH=302
	IRGSP	Os06t0649000-02	Similar to WRKY transcription factor 28.
	nr	gb|EOY26053.1|	WRKY DNA-binding protein 40, putative isoform 2 [Theobroma cacao]
CL2189.Contig2_FF_5AStem	TAIR	AT1G80840.1	| Symbols: WRKY40, ATWRKY40 | WRKY DNA-binding protein 40 | chr1:30383834-30385356 FORWARD LENGTH=302
	IRGSP	Os06t0649000-02	Similar to WRKY transcription factor 28.
	nr	gb|EOY26053.1|	WRKY DNA-binding protein 40, putative isoform 2 [Theobroma cacao]
CL2189.Contig3_FF_5AStem	TAIR	AT1G80840.1	| Symbols: WRKY40, ATWRKY40 | WRKY DNA-binding protein 40 | chr1:30383834-30385356 FORWARD LENGTH=302
	IRGSP	Os06t0649000-02	Similar to WRKY transcription factor 28.
	nr	gb|EOY26053.1|	WRKY DNA-binding protein 40, putative isoform 2 [Theobroma cacao]
CL2189.Contig4_FF_5AStem	TAIR	AT1G80840.1	| Symbols: WRKY40, ATWRKY40 | WRKY DNA-binding protein 40 | chr1:30383834-30385356 FORWARD LENGTH=302
	IRGSP	Os06t0649000-02	Similar to WRKY transcription factor 28.
	nr	gb|EOY26053.1|	WRKY DNA-binding protein 40, putative isoform 2 [Theobroma cacao]
CL2336.Contig1_FF_5AStem	TAIR	AT2G38470.1	| Symbols: WRKY33, ATWRKY33 | WRKY DNA-binding protein 33 | chr2:16108476-16110539 FORWARD LENGTH=519
	IRGSP	Os01t0826400-01	WRKY transcription factor 24 (WRKY24).
	nr	gb|EOY34631.1|	WRKY DNA-binding protein 33 isoform 1 [Theobroma cacao]
CL2336.Contig2_FF_5AStem	TAIR	AT2G38470.1	| Symbols: WRKY33, ATWRKY33 | WRKY DNA-binding protein 33 | chr2:16108476-16110539 FORWARD LENGTH=519
	IRGSP	Os01t0826400-01	WRKY transcription factor 24 (WRKY24).
	nr	emb|CAP08303.1|	DNA-binding protein [Vitis thunbergii]
CL2805.Contig1_FF_5AStem	TAIR	AT1G29280.1	| Symbols: WRKY65, ATWRKY65 | WRKY DNA-binding protein 65 | chr1:10236589-10237467 FORWARD LENGTH=259
	IRGSP	Os01t0730700-01	WRKY transcription factor 14 (WRKY14).
	nr	ref|XP_002269267.1|	PREDICTED: probable WRKY transcription factor 65 [Vitis vinifera] gi|297740534|emb|CBI30716.3| unnamed protein product [Vitis vinifera]
CL2805.Contig2_FF_5AStem	TAIR	AT1G29280.1	| Symbols: WRKY65, ATWRKY65 | WRKY DNA-binding protein 65 | chr1:10236589-10237467 FORWARD LENGTH=259
	IRGSP	Os01t0730700-01	WRKY transcription factor 14 (WRKY14).
	nr	ref|XP_002269267.1|	PREDICTED: probable WRKY transcription factor 65 [Vitis vinifera] gi|297740534|emb|CBI30716.3| unnamed protein product [Vitis vinifera]
CL2805.Contig3_FF_5AStem	TAIR	AT1G29280.1	| Symbols: WRKY65, ATWRKY65 | WRKY DNA-binding protein 65 | chr1:10236589-10237467 FORWARD LENGTH=259
	IRGSP	Os01t0730700-01	WRKY transcription factor 14 (WRKY14).
	nr	ref|XP_002269267.1|	PREDICTED: probable WRKY transcription factor 65 [Vitis vinifera] gi|297740534|emb|CBI30716.3| unnamed protein product [Vitis vinifera]
CL2805.Contig4_FF_5AStem	TAIR	AT1G29280.1	| Symbols: WRKY65, ATWRKY65 | WRKY DNA-binding protein 65 | chr1:10236589-10237467 FORWARD LENGTH=259
	IRGSP	Os01t0730700-01	WRKY transcription factor 14 (WRKY14).
	nr	ref|XP_002269267.1|	PREDICTED: probable WRKY transcription factor 65 [Vitis vinifera] gi|297740534|emb|CBI30716.3| unnamed protein product [Vitis vinifera]
CL2971.Contig1_FF_5AStem	TAIR	AT5G26170.1	| Symbols: WRKY50, ATWRKY50 | WRKY DNA-binding protein 50 | chr5:9147176-9148128 REVERSE LENGTH=173
	IRGSP	Os05t0537100-00	WRKY transcription factor 10.
	nr	gb|EAY98838.1|	hypothetical protein OsI_20783 [Oryza sativa Indica Group]
71.Contig2_FF_5AStem	TAIR	AT5G64810.1	| Symbols: WRKY51, ATWRKY51 | WRKY DNA-binding protein 51 | chr5:25908415-25909687 FORWARD LENGTH=194
	IRGSP	Os05t0537100-00	WRKY transcription factor 10.
	nr	gb|EAY98838.1|	hypothetical protein OsI_20783 [Oryza sativa Indica Group]
CL3271.Contig1_FF_5AStem	TAIR	AT5G56270.1	| Symbols: WRKY2, ATWRKY2 | WRKY DNA-binding protein 2 | chr5:22780816-22783137 FORWARD LENGTH=687
	IRGSP	Os08t0499300-01	WRKY transcription factor 30.
	nr	emb|CBI39865.3|	unnamed protein product [Vitis vinifera]
CL4074.Contig1_FF_5AStem	TAIR	AT2G38470.1	| Symbols: WRKY33, ATWRKY33 | WRKY DNA-binding protein 33 | chr2:16108476-16110539 FORWARD LENGTH=519
	IRGSP	Os05t0343400-01	WRKY transcription factor 53 (Transcription factor WRKY12).
	nr	dbj|BAI63296.1|	double WRKY type transfactor [Nicotiana benthamiana]
CL4720.Contig1_FF_5AStem	TAIR	AT4G26640.2	| Symbols: WRKY20, AtWRKY20 | WRKY family transcription factor family protein | chr4:13437298-13440693 REVERSE LENGTH=557
	IRGSP	Os07t0583700-01	WRKY transcription factor 78.
	nr	gb|EAZ04490.1|	hypothetical protein OsI_26641 [Oryza sativa Indica Group]
CL4720.Contig2_FF_5AStem	TAIR	AT4G26640.2	| Symbols: WRKY20, AtWRKY20 | WRKY family transcription factor family protein | chr4:13437298-13440693 REVERSE LENGTH=557
	IRGSP	Os07t0583700-01	WRKY transcription factor 78.
	nr	gb|EAZ04490.1|	hypothetical protein OsI_26641 [Oryza sativa Indica Group]
CL4933.Contig1_FF_5AStem	TAIR	AT4G11070.1	| Symbols: WRKY41, AtWRKY41 | WRKY family transcription factor | chr4:6759303-6760763 FORWARD LENGTH=313
	IRGSP	Os08t0386200-01	WRKY transcription factor 69.
	nr	ref|XP_002302620.1|	predicted protein [Populus trichocarpa] gi|222844346|gb|EEE81893.1| predicted protein [Populus trichocarpa]
CL4933.Contig2_FF_5AStem	TAIR	AT4G11070.1	| Symbols: WRKY41, AtWRKY41 | WRKY family transcription factor | chr4:6759303-6760763 FORWARD LENGTH=313
	IRGSP	Os08t0386200-01	WRKY transcription factor 69.
	nr	ref|XP_002302620.1|	predicted protein [Populus trichocarpa] gi|222844346|gb|EEE81893.1| predicted protein [Populus trichocarpa]
CL5134.Contig1_FF_5AStem	TAIR	AT2G30590.1	| Symbols: WRKY21 | WRKY DNA-binding protein 21 | chr2:13033891-13035303 FORWARD LENGTH=380
	IRGSP	Os12t0597700-01	Similar to WRKY2 (Fragment).
	nr	emb|CBI35175.3|	unnamed protein product [Vitis vinifera]
CL5134.Contig2_FF_5AStem	TAIR	AT2G30590.1	| Symbols: WRKY21 | WRKY DNA-binding protein 21 | chr2:13033891-13035303 FORWARD LENGTH=380
	IRGSP	Os12t0597700-02	Similar to WRKY DNA binding domain containing protein, expressed.
	nr	ref|XP_002520995.1|	WRKY transcription factor, putative [Ricinus communis] gi|223539832|gb|EEF41412.1| WRKY transcription factor, putative [Ricinus communis]
CL6502.Contig1_FF_5AStem	TAIR	AT1G70060.1	| Symbols: SNL4 | SIN3-like 4 | chr1:26383789-26389568 FORWARD LENGTH=1326
	IRGSP	Os01t0109700-01	Similar to Paired amphipathic helix repeat-containing protein / transcription regulator-related.
	nr	gb|EOY00289.1|	WRKY domain class transcription factor [Theobroma cacao]
CL7378.Contig2_FF_5AStem	TAIR	--No_Hits--
	IRGSP	Os05t0343400-01	WRKY transcription factor 53 (Transcription factor WRKY12).
	nr	dbj|BAA06278.1|	SPF1 protein [Ipomoea batatas]
CL7567.Contig1_FF_5AStem	TAIR	AT4G31550.2	| Symbols: WRKY11, ATWRKY11 | WRKY DNA-binding protein 11 | chr4:15290065-15291458 REVERSE LENGTH=324
	IRGSP	Os04t0287400-01	Similar to WRKY transcription factor 51.
	nr	emb|CBI17876.3|	unnamed protein product [Vitis vinifera]
CL7567.Contig2_FF_5AStem	TAIR	AT4G31550.2	| Symbols: WRKY11, ATWRKY11 | WRKY DNA-binding protein 11 | chr4:15290065-15291458 REVERSE LENGTH=324
	IRGSP	Os04t0605100-01	WRKY transcription factor 68.
	nr	gb|AET36536.1|	WRKY11 [Gossypium hirsutum] gi|356690061|gb|AET36544.1| WRKY11 [Gossypium hirsutum]
Unigene1041_FF_5AStem	TAIR	AT5G64810.1	| Symbols: WRKY51, ATWRKY51 | WRKY DNA-binding protein 51 | chr5:25908415-25909687 FORWARD LENGTH=194
	IRGSP	Os05t0537100-00	WRKY transcription factor 10.
	nr	ref|XP_002440147.1|	hypothetical protein SORBIDRAFT_09g026830 [Sorghum bicolor] gi|241945432|gb|EES18577.1| hypothetical protein SORBIDRAFT_09g026830 [Sorghum bicolor]
Unigene12390_FF_5AStem	TAIR	AT3G56400.1	| Symbols: WRKY70, ATWRKY70 | WRKY DNA-binding protein 70 | chr3:20909082-20910409 REVERSE LENGTH=294
	IRGSP	Os11t0116900-01	Similar to WRKY DNA binding domain containing protein, expressed.
	nr	gb|EMT28936.1|	WRKY transcription factor 55 [Aegilops tauschii]
Unigene12809_FF_5AStem	TAIR	AT4G22070.1	| Symbols: WRKY31, ATWRKY31 | WRKY DNA-binding protein 31 | chr4:11691381-11694234 REVERSE LENGTH=538
	IRGSP	Os05t0137500-00	Similar to WRKY transcription factor 5.
	nr	ref|XP_002518444.1|	WRKY transcription factor, putative [Ricinus communis] gi|223542289|gb|EEF43831.1| WRKY transcription factor, putative [Ricinus communis]
Unigene12810_FF_5AStem	TAIR	AT1G62300.1	| Symbols: WRKY6, ATWRKY6 | WRKY family transcription factor | chr1:23016887-23019155 REVERSE LENGTH=553
	IRGSP	Os01t0246700-01	Similar to WRKY transcription factor 1.
	nr	gb|EOY28756.1|	WRKY family transcription factor [Theobroma cacao]
Unigene16045_FF_5AStem	TAIR	AT5G49520.1	| Symbols: WRKY48, ATWRKY48 | WRKY DNA-binding protein 48 | chr5:20090890-20092867 FORWARD LENGTH=399
	IRGSP	Os05t0565900-00	DNA-binding WRKY domain containing protein.
	nr	ref|XP_002279385.1|	PREDICTED: probable WRKY transcription factor 48 [Vitis vinifera] gi|296083226|emb|CBI22862.3| unnamed protein product [Vitis vinifera]
Unigene16996_FF_5AStem	TAIR	AT2G40750.1	| Symbols: WRKY54, ATWRKY54 | WRKY DNA-binding protein 54 | chr2:17000636-17002354 REVERSE LENGTH=346
	IRGSP	Os05t0321900-01	DNA-binding WRKY domain containing protein.
	nr	ref|XP_002450147.1|	hypothetical protein SORBIDRAFT_05g001170 [Sorghum bicolor] gi|241935990|gb|EES09135.1| hypothetical protein SORBIDRAFT_05g001170 [Sorghum bicolor]
Unigene17462_FF_5AStem	TAIR	AT3G56400.1	| Symbols: WRKY70, ATWRKY70 | WRKY DNA-binding protein 70 | chr3:20909082-20910409 REVERSE LENGTH=294
	IRGSP	Os05t0322900-01	Similar to WRKY transcription factor 45.
	nr	ref|XP_003566383.1|	PREDICTED: uncharacterized protein LOC100836752 [Brachypodium distachyon]
Unigene17993_FF_5AStem	TAIR	--No_Hits--
	IRGSP	Os05t0478700-00	Hypothetical conserved gene.
	nr	ref|NP_001172629.1|	Os01g0821300 [Oryza sativa Japonica Group] gi|18844829|dbj|BAB85299.1| WRKY transcription factor 64-like protein [Oryza sativa Japonica Group] gi|19571054|dbj|BAB86480.1| WRKY transcription factor 64-like protein [Oryza sativa Japonica Group] gi|255673827|dbj|BAH91359.1| Os01g0821300 [Oryza sativa Japonica Group]
Unigene19974_FF_5AStem	TAIR	AT1G66550.2	| Symbols: WRKY67, ATWRKY67 | WRKY DNA-binding protein 67 | chr1:24828537-24829589 FORWARD LENGTH=249
	IRGSP	Os11t0117500-01	DNA-binding WRKY domain containing protein.
	nr	gb|ABA96294.1|	WRKY DNA binding domain containing protein, expressed [Oryza sativa Japonica Group] gi|125578297|gb|EAZ19443.1| hypothetical protein OsJ_35004 [Oryza sativa Japonica Group]
Unigene21604_FF_5AStem	TAIR	AT1G04640.2	| Symbols: LIP2 | lipoyltransferase 2 | chr1:1292541-1293248 FORWARD LENGTH=235
	IRGSP	Os03t0321800-02	Similar to WRKY transcription factor 55.
	nr	ref|XP_002297668.1|	predicted protein [Populus trichocarpa] gi|222844926|gb|EEE82473.1| predicted protein [Populus trichocarpa]
Unigene21993_FF_5AStem	TAIR	AT2G34830.1	| Symbols: WRKY35, MEE24, AtWRKY35 | WRKY DNA-binding protein 35 | chr2:14693839-14696378 REVERSE LENGTH=427
	IRGSP	Os04t0597300-01	Similar to WERKY protein (Fragment).
	nr	ref|XP_003624081.1|	WRKY transcription factor [Medicago truncatula] gi|355499096|gb|AES80299.1| WRKY transcription factor [Medicago truncatula]
Unigene22266_FF_5AStem	TAIR	AT1G04640.2	| Symbols: LIP2 | lipoyltransferase 2 | chr1:1292541-1293248 FORWARD LENGTH=235
	IRGSP	Os03t0321800-02	Similar to WRKY transcription factor 55.
	nr	ref|XP_002525976.1|	lipoate-protein ligase B, putative [Ricinus communis] gi|223534708|gb|EEF36400.1| lipoate-protein ligase B, putative [Ricinus communis]
Unigene22283_FF_5AStem	TAIR	AT5G56270.1	| Symbols: WRKY2, ATWRKY2 | WRKY DNA-binding protein 2 | chr5:22780816-22783137 FORWARD LENGTH=687
	IRGSP	Os04t0471700-00	Similar to WRKY10 (WRKY transcription factor 35).
	nr	ref|XP_003579949.1|	PREDICTED: probable WRKY transcription factor 2-like [Brachypodium distachyon]
Unigene24446_FF_5AStem	TAIR	AT2G34830.1	| Symbols: WRKY35, MEE24, AtWRKY35 | WRKY DNA-binding protein 35 | chr2:14693839-14696378 REVERSE LENGTH=427
	IRGSP	Os04t0597300-01	Similar to WERKY protein (Fragment).
	nr	ref|XP_004231651.1|	PREDICTED: LOW QUALITY PROTEIN: probable WRKY transcription factor 35-like [Solanum lycopersicum]
Unigene26797_FF_5AStem	TAIR	AT1G80840.1	| Symbols: WRKY40, ATWRKY40 | WRKY DNA-binding protein 40 | chr1:30383834-30385356 FORWARD LENGTH=302
	IRGSP	Os06t0649000-02	Similar to WRKY transcription factor 28.
	nr	gb|ADU02585.1|	WRKY transcription factor 4 [Vitis vinifera]
Unigene28159_FF_5AStem	TAIR	AT4G11070.1	| Symbols: WRKY41, AtWRKY41 | WRKY family transcription factor | chr4:6759303-6760763 FORWARD LENGTH=313
	IRGSP	Os01t0656400-00	Similar to WRKY transcription factor 15.
	nr	gb|EOY23457.1|	WRKY DNA-binding protein 30, putative [Theobroma cacao]
Unigene28222_FF_5AStem	TAIR	AT2G38470.1	| Symbols: WRKY33, ATWRKY33 | WRKY DNA-binding protein 33 | chr2:16108476-16110539 FORWARD LENGTH=519
	IRGSP	Os05t0343400-01	WRKY transcription factor 53 (Transcription factor WRKY12).
	nr	gb|EMJ09489.1|	hypothetical protein PRUPE_ppa003333mg [Prunus persica]
Unigene31913_FF_5AStem	TAIR	AT1G28280.2	| Symbols: | VQ motif-containing protein | chr1:9886297-9887395 REVERSE LENGTH=243
	IRGSP	Os01t0201250-00	Similar to DNA-binding WRKY.
	nr	ref|XP_004244236.1|	PREDICTED: uncharacterized protein LOC101257285 [Solanum lycopersicum]
Unigene37137_FF_5AStem	TAIR	AT2G44745.1	| Symbols: | WRKY family transcription factor | chr2:18447482-18449004 REVERSE LENGTH=218
	IRGSP	Os04t0545000-01	Similar to WRKY transcription factor 34.
	nr	ref|XP_004229735.1|	PREDICTED: probable WRKY transcription factor 12-like [Solanum lycopersicum]
Unigene39240_FF_5AStem	TAIR	AT2G34830.1	| Symbols: WRKY35, MEE24, AtWRKY35 | WRKY DNA-binding protein 35 | chr2:14693839-14696378 REVERSE LENGTH=427
	IRGSP	Os01t0750100-03	Similar to WRKY13 transcription factor.
	nr	ref|XP_002270750.2|	PREDICTED: LOW QUALITY PROTEIN: WRKY transcription factor 22 [Vitis vinifera]
Unigene40099_FF_5AStem	TAIR	AT4G39410.1	| Symbols: WRKY13, ATWRKY13 | WRKY DNA-binding protein 13 | chr4:18332937-18334789 REVERSE LENGTH=304
	IRGSP	Os01t0182700-01	Similar to WRKY12.
	nr	ref|XP_004288129.1|	PREDICTED: probable WRKY transcription factor 13-like [Fragaria vesca subsp. vesca]
Unigene40238_FF_5AStem	TAIR	AT1G29280.1	| Symbols: WRKY65, ATWRKY65 | WRKY DNA-binding protein 65 | chr1:10236589-10237467 FORWARD LENGTH=259
	IRGSP	Os02t0265200-01	WRKY transcription factor 39.
	nr	ref|NP_001046497.1|	Os02g0265200 [Oryza sativa Japonica Group] gi|50251953|dbj|BAD27888.1| putative WRKY transcription factor [Oryza sativa Japonica Group] gi|113536028|dbj|BAF08411.1| Os02g0265200 [Oryza sativa Japonica Group] gi|215694932|dbj|BAG90123.1| unnamed protein product [Oryza sativa Japonica Group] gi|222622565|gb|EEE56697.1| hypothetical protein OsJ_06167 [Oryza sativa Japonica Group]
Unigene46400_FF_5AStem	TAIR	AT5G56270.1	| Symbols: WRKY2, ATWRKY2 | WRKY DNA-binding protein 2 | chr5:22780816-22783137 FORWARD LENGTH=687
	IRGSP	Os04t0471700-00	Similar to WRKY10 (WRKY transcription factor 35).
	nr	gb|ACY24296.1|	WRKY transcription factor 12 [Cocos nucifera]
Unigene4691_FF_5AStem	TAIR	AT5G43290.1	| Symbols: WRKY49, ATWRKY49 | WRKY DNA-binding protein 49 | chr5:17371987-17373083 REVERSE LENGTH=274
	IRGSP	Os01t0972800-01	WRKY1 (WRKY transcription factor 17).
	nr	gb|EMJ07726.1|	hypothetical protein PRUPE_ppa019550mg [Prunus persica]
Unigene4705_FF_5AStem	TAIR	AT3G56400.1	| Symbols: WRKY70, ATWRKY70 | WRKY DNA-binding protein 70 | chr3:20909082-20910409 REVERSE LENGTH=294
	IRGSP	Os05t0478400-00	Similar to WRKY transcription factor 48.
	nr	ref|XP_004305075.1|	PREDICTED: probable WRKY transcription factor 70-like [Fragaria vesca subsp. vesca]
Unigene4943_FF_5AStem	TAIR	AT4G26640.2	| Symbols: WRKY20, AtWRKY20 | WRKY family transcription factor family protein | chr4:13437298-13440693 REVERSE LENGTH=557
	IRGSP	Os07t0583700-01	WRKY transcription factor 78.
	nr	gb|AEQ29020.1|	WRKY7 [Panax quinquefolius]
Unigene5214_FF_5AStem	TAIR	AT4G30935.1	| Symbols: WRKY32, ATWRKY32 | WRKY DNA-binding protein 32 | chr4:15051916-15053908 REVERSE LENGTH=466
	IRGSP	Os09t0481700-02	SUSIBA2-like (WRKY transcription factor 80).
	nr	dbj|BAC99487.1|	putative DNA-binding protein WRKY2 [Oryza sativa Japonica Group]
Unigene5215_FF_5AStem	TAIR	AT1G13960.2	| Symbols: WRKY4 | WRKY DNA-binding protein 4 | chr1:4776622-4779043 FORWARD LENGTH=487
	IRGSP	Os05t0474800-01	WRKY transcription factor 70.
	nr	ref|XP_003571606.1|	PREDICTED: probable WRKY transcription factor 4-like [Brachypodium distachyon]
Unigene6461_FF_5AStem	TAIR	AT5G13080.1	| Symbols: WRKY75, ATWRKY75 | WRKY DNA-binding protein 75 | chr5:4149928-4151019 REVERSE LENGTH=145
	IRGSP	Os11t0490900-01	Similar to WRKY transcription factor 72.
	nr	tpg|DAA41982.1|	TPA: putative WRKY DNA-binding domain superfamily protein [Zea mays]
Unigene6585_FF_5AStem	TAIR	AT1G13960.1	| Symbols: WRKY4 | WRKY DNA-binding protein 4 | chr1:4776622-4779043 FORWARD LENGTH=514
	IRGSP	Os12t0507300-00	Similar to WRKY DNA binding domain containing protein, expressed.
	nr	gb|AAT46067.1|	DNA binding protein WRKY2 [Vitis vinifera]
Unigene7576_FF_5AStem	TAIR	AT5G56270.1	| Symbols: WRKY2, ATWRKY2 | WRKY DNA-binding protein 2 | chr5:22780816-22783137 FORWARD LENGTH=687
	IRGSP	Os09t0481700-02	SUSIBA2-like (WRKY transcription factor 80).
	nr	gb|AGJ52156.1|	WRKY transcription factor 11 [Jatropha curcas]
Unigene8430_FF_5AStem	TAIR	AT5G07100.1	| Symbols: WRKY26 | WRKY DNA-binding protein 26 | chr5:2204313-2205647 FORWARD LENGTH=309
	IRGSP	Os12t0507300-00	Similar to WRKY DNA binding domain containing protein, expressed.
	nr	ref|XP_002323445.1|	predicted protein [Populus trichocarpa] gi|222868075|gb|EEF05206.1| predicted protein [Populus trichocarpa]

## Sheet: Myb
ID	DB	AC	Annotation
CL1238.Contig1_DHA_Bulb	TAIR	AT1G21380.1	| Symbols: | Target of Myb protein 1 | chr1:7485806-7488032 REVERSE LENGTH=506
	IRGSP	Os11t0199700-02	Similar to Seed protein B32E (Fragment).
	nr	gb|EOY16496.1|	Target of Myb protein 1 isoform 1 [Theobroma cacao] gi|508724600|gb|EOY16497.1| Target of Myb protein 1 isoform 1 [Theobroma cacao]
CL1573.Contig1_DHA_Bulb	TAIR	AT3G61250.1	| Symbols: AtMYB17, MYB17 | myb domain protein 17 | chr3:22671306-22672551 FORWARD LENGTH=299
	IRGSP	Os02t0641900-01	Similar to P-type R2R3 Myb protein.
	nr	dbj|BAD25229.1|	putative P-type R2R3 Myb protein [Oryza sativa Japonica Group]
CL1904.Contig1_DHA_Bulb	TAIR	AT1G09770.1	| Symbols: ATCDC5, CDC5, ATMYBCDC5 | cell division cycle 5 | chr1:3162002-3165122 FORWARD LENGTH=844
	IRGSP	Os04t0348300-01	Similar to OSIGBa0130K07.8 protein.
	nr	ref|XP_002265478.1|	PREDICTED: cell division cycle 5-like protein [Vitis vinifera]
CL1904.Contig2_DHA_Bulb	TAIR	AT1G09770.1	| Symbols: ATCDC5, CDC5, ATMYBCDC5 | cell division cycle 5 | chr1:3162002-3165122 FORWARD LENGTH=844
	IRGSP	Os04t0348300-01	Similar to OSIGBa0130K07.8 protein.
	nr	ref|XP_002265478.1|	PREDICTED: cell division cycle 5-like protein [Vitis vinifera]
CL210.Contig1_DHA_Bulb	TAIR	AT1G09540.1	| Symbols: MYB61, ATMYB61 | myb domain protein 61 | chr1:3086333-3087689 FORWARD LENGTH=366
	IRGSP	Os05t0140100-03	Myb transcription factor domain containing protein.
	nr	ref|XP_004135763.1|	PREDICTED: uncharacterized protein LOC101203786 [Cucumis sativus]
CL2933.Contig1_DHA_Bulb	TAIR	AT2G37630.1	| Symbols: ATPHAN, AS1, ATMYB91, MYB91 | myb-like HTH transcriptional regulator family protein | chr2:15781798-15782901 REVERSE LENGTH=367
	IRGSP	Os12t0572000-00	Similar to Protein rough sheath 2 homolog.
	nr	dbj|BAM08930.1|	asymmetric leaves1 [Asparagus asparagoides]
CL2988.Contig1_DHA_Bulb	TAIR	AT1G55540.1	| Symbols: emb1011 | Nuclear pore complex protein | chr1:20734759-20743049 REVERSE LENGTH=1816
	IRGSP	Os07t0685400-01	Conserved hypothetical protein.
	nr	gb|EMT14894.1|	Myb family transcription factor APL [Aegilops tauschii]
CL2988.Contig2_DHA_Bulb	TAIR	AT1G55540.1	| Symbols: emb1011 | Nuclear pore complex protein | chr1:20734759-20743049 REVERSE LENGTH=1816
	IRGSP	Os07t0685400-01	Conserved hypothetical protein.
	nr	gb|EMT14894.1|	Myb family transcription factor APL [Aegilops tauschii]
CL2988.Contig3_DHA_Bulb	TAIR	AT1G55540.1	| Symbols: emb1011 | Nuclear pore complex protein | chr1:20734759-20743049 REVERSE LENGTH=1816
	IRGSP	--No_Hits--
	nr	gb|EMT14894.1|	Myb family transcription factor APL [Aegilops tauschii]
CL2988.Contig4_DHA_Bulb	TAIR	AT1G55540.1	| Symbols: emb1011 | Nuclear pore complex protein | chr1:20734759-20743049 REVERSE LENGTH=1816
	IRGSP	--No_Hits--
	nr	gb|EMT14894.1|	Myb family transcription factor APL [Aegilops tauschii]
CL3103.Contig1_DHA_Bulb	TAIR	AT1G49950.1	| Symbols: TRB1, ATTRB1 | telomere repeat binding factor 1 | chr1:18494439-18496713 REVERSE LENGTH=300
	IRGSP	Os01t0708000-00	Similar to Single myb histone 4.
	nr	ref|XP_002281183.1|	PREDICTED: uncharacterized protein LOC100254369 [Vitis vinifera] gi|297738637|emb|CBI27882.3| unnamed protein product [Vitis vinifera]
CL3103.Contig2_DHA_Bulb	TAIR	AT1G49950.1	| Symbols: TRB1, ATTRB1 | telomere repeat binding factor 1 | chr1:18494439-18496713 REVERSE LENGTH=300
	IRGSP	Os01t0708000-00	Similar to Single myb histone 4.
	nr	gb|EMS64071.1|	Glycylpeptide N-tetradecanoyltransferase 1 [Triticum urartu]
CL3443.Contig1_DHA_Bulb	TAIR	AT1G49950.1	| Symbols: TRB1, ATTRB1 | telomere repeat binding factor 1 | chr1:18494439-18496713 REVERSE LENGTH=300
	IRGSP	Os12t0613300-02	Similar to Single myb histone 6.
	nr	ref|XP_002525279.1|	Histone H1.1, putative [Ricinus communis] gi|223535437|gb|EEF37107.1| Histone H1.1, putative [Ricinus communis]
CL3575.Contig1_DHA_Bulb	TAIR	AT2G01060.1	| Symbols: | myb-like HTH transcriptional regulator family protein | chr2:73456-74902 REVERSE LENGTH=286
	IRGSP	Os09t0299200-01	Similar to MYB-CC type transfactor.
	nr	ref|XP_002460002.1|	hypothetical protein SORBIDRAFT_02g020700 [Sorghum bicolor] gi|241923379|gb|EER96523.1| hypothetical protein SORBIDRAFT_02g020700 [Sorghum bicolor]
CL3575.Contig2_DHA_Bulb	TAIR	AT2G01060.1	| Symbols: | myb-like HTH transcriptional regulator family protein | chr2:73456-74902 REVERSE LENGTH=286
	IRGSP	Os06t0609500-01	Homeodomain-like containing protein.
	nr	ref|XP_002272588.2|	PREDICTED: uncharacterized protein LOC100248144 [Vitis vinifera]
CL3575.Contig3_DHA_Bulb	TAIR	AT2G01060.1	| Symbols: | myb-like HTH transcriptional regulator family protein | chr2:73456-74902 REVERSE LENGTH=286
	IRGSP	Os06t0609500-01	Homeodomain-like containing protein.
	nr	ref|XP_002272588.2|	PREDICTED: uncharacterized protein LOC100248144 [Vitis vinifera]
CL3595.Contig1_DHA_Bulb	TAIR	AT2G47210.1	| Symbols: | myb-like transcription factor family protein | chr2:19379039-19382204 FORWARD LENGTH=441
	IRGSP	Os05t0540800-01	Homeodomain-like containing protein.
	nr	gb|EOX95359.1|	Myb-like transcription factor family protein isoform 3 [Theobroma cacao]
CL4104.Contig1_DHA_Bulb	TAIR	AT1G06180.1	| Symbols: ATMYB13, ATMYBLFGN, MYB13 | myb domain protein 13 | chr1:1889510-1891089 FORWARD LENGTH=246
	IRGSP	Os02t0624300-01	Similar to Y19 protein.
	nr	gb|AFK39973.1|	unknown [Medicago truncatula]
CL4104.Contig2_DHA_Bulb	TAIR	AT2G31180.1	| Symbols: ATMYB14, MYB14AT, MYB14 | myb domain protein 14 | chr2:13286806-13288175 REVERSE LENGTH=249
	IRGSP	Os02t0624300-01	Similar to Y19 protein.
	nr	gb|EMS62386.1|	Myb-related protein Myb4 [Triticum urartu]
CL4104.Contig3_DHA_Bulb	TAIR	AT2G31180.1	| Symbols: ATMYB14, MYB14AT, MYB14 | myb domain protein 14 | chr2:13286806-13288175 REVERSE LENGTH=249
	IRGSP	Os02t0624300-01	Similar to Y19 protein.
	nr	ref|XP_004289939.1|	PREDICTED: myb-related protein Myb4-like [Fragaria vesca subsp. vesca]
CL46.Contig1_DHA_Bulb	TAIR	AT1G06180.1	| Symbols: ATMYB13, ATMYBLFGN, MYB13 | myb domain protein 13 | chr1:1889510-1891089 FORWARD LENGTH=246
	IRGSP	Os02t0624300-01	Similar to Y19 protein.
	nr	dbj|BAA88224.1|	myb-related transcription factor LBM4 [Nicotiana tabacum]
CL46.Contig2_DHA_Bulb	TAIR	AT2G31180.1	| Symbols: ATMYB14, MYB14AT, MYB14 | myb domain protein 14 | chr2:13286806-13288175 REVERSE LENGTH=249
	IRGSP	Os02t0624300-01	Similar to Y19 protein.
	nr	ref|XP_002281274.1|	PREDICTED: myb-related protein Myb4 [Vitis vinifera]
CL46.Contig3_DHA_Bulb	TAIR	AT3G23250.1	| Symbols: MYB15, ATY19, ATMYB15 | myb domain protein 15 | chr3:8309492-8310624 FORWARD LENGTH=285
	IRGSP	Os02t0624300-01	Similar to Y19 protein.
	nr	gb|EMJ23031.1|	hypothetical protein PRUPE_ppa020190mg [Prunus persica]
CL5159.Contig1_DHA_Bulb	TAIR	AT5G18240.5	| Symbols: MYR1 | myb-related protein 1 | chr5:6028617-6030573 REVERSE LENGTH=400
	IRGSP	Os03t0325500-01	Similar to Phosphate starvation regulator protein (Regulatory protein of P- starvation acclimation response Psr1).
	nr	ref|XP_002467933.1|	hypothetical protein SORBIDRAFT_01g036680 [Sorghum bicolor] gi|241921787|gb|EER94931.1| hypothetical protein SORBIDRAFT_01g036680 [Sorghum bicolor]
CL542.Contig1_DHA_Bulb	TAIR	AT4G19110.1	| Symbols: | Protein kinase superfamily protein | chr4:10454770-10457468 REVERSE LENGTH=461
	IRGSP	Os02t0700600-01	Similar to GAMYB-binding protein.
	nr	gb|EOY25312.1|	Kinase superfamily protein isoform 1 [Theobroma cacao] gi|508778057|gb|EOY25313.1| Kinase superfamily protein isoform 1 [Theobroma cacao]
CL542.Contig2_DHA_Bulb	TAIR	AT4G19110.2	| Symbols: | Protein kinase superfamily protein | chr4:10454770-10457468 REVERSE LENGTH=464
	IRGSP	Os02t0700600-01	Similar to GAMYB-binding protein.
	nr	ref|XP_002265359.2|	PREDICTED: cyclin-dependent kinase F-4-like [Vitis vinifera] gi|296088459|emb|CBI37450.3| unnamed protein product [Vitis vinifera]
CL549.Contig1_DHA_Bulb	TAIR	AT1G66230.1	| Symbols: MYB20, AtMYB20 | myb domain protein 20 | chr1:24677322-24678246 FORWARD LENGTH=282
	IRGSP	Os06t0258000-01	Similar to Typical P-type R2R3 Myb protein (Fragment).
	nr	--No_Hits--
CL549.Contig2_DHA_Bulb	TAIR	AT4G12350.1	| Symbols: MYB42, AtMYB42 | myb domain protein 42 | chr4:7324912-7326636 FORWARD LENGTH=286
	IRGSP	Os06t0258000-01	Similar to Typical P-type R2R3 Myb protein (Fragment).
	nr	--No_Hits--
CL5528.Contig1_DHA_Bulb	TAIR	AT1G14350.2	| Symbols: FLP, MYB124 | Duplicated homeodomain-like superfamily protein | chr1:4908427-4910647 FORWARD LENGTH=436
	IRGSP	Os07t0627300-01	Similar to Myb-related protein B (B-Myb).
	nr	emb|CBI31992.3|	unnamed protein product [Vitis vinifera]
CL5789.Contig1_DHA_Bulb	TAIR	AT2G36890.1	| Symbols: RAX2, MYB38, ATMYB38, BIT1 | Duplicated homeodomain-like superfamily protein | chr2:15485821-15487245 FORWARD LENGTH=298
	IRGSP	Os05t0553400-01	Similar to Myb-related transcription factor-like protein (MYB transcription factor).
	nr	ref|XP_003535147.1|	PREDICTED: transcription factor GAMYB-like [Glycine max]
CL5789.Contig2_DHA_Bulb	TAIR	AT2G36890.1	| Symbols: RAX2, MYB38, ATMYB38, BIT1 | Duplicated homeodomain-like superfamily protein | chr2:15485821-15487245 FORWARD LENGTH=298
	IRGSP	Os05t0553400-01	Similar to Myb-related transcription factor-like protein (MYB transcription factor).
	nr	ref|XP_003542525.1|	PREDICTED: transcription repressor MYB4-like [Glycine max]
CL6028.Contig2_DHA_Bulb	TAIR	AT5G58900.1	| Symbols: | Homeodomain-like transcriptional regulator | chr5:23783275-23784667 REVERSE LENGTH=288
	IRGSP	Os01t0142500-01	Homeodomain-like containing protein.
	nr	gb|ACG28977.1|	MYB-like transcription factor DIVARICATA [Zea mays] gi|195645206|gb|ACG42071.1| MYB-like transcription factor DIVARICATA [Zea mays]
CL6033.Contig1_DHA_Bulb	TAIR	AT4G13020.3	| Symbols: MHK | Protein kinase superfamily protein | chr4:7604015-7606812 FORWARD LENGTH=444
	IRGSP	Os03t0847600-02	Similar to GAMYB-binding protein.
	nr	ref|NP_001140217.1|	uncharacterized LOC100272250 [Zea mays] gi|194696202|gb|ACF82185.1| unknown [Zea mays] gi|194697258|gb|ACF82713.1| unknown [Zea mays] gi|194698536|gb|ACF83352.1| unknown [Zea mays] gi|195640860|gb|ACG39898.1| serine/threonine-protein kinase MHK [Zea mays] gi|414873921|tpg|DAA52478.1| TPA: putative protein kinase superfamily protein isoform 1 [Zea mays] gi|414873922|tpg|DAA52479.1| TPA: putative p…
CL6191.Contig1_DHA_Bulb	TAIR	AT5G16880.2	| Symbols: | Target of Myb protein 1 | chr5:5549658-5551274 FORWARD LENGTH=407
	IRGSP	Os02t0697300-01	ENTH/VHS domain containing protein.
	nr	ref|XP_002275091.1|	PREDICTED: TOM1-like protein 2 [Vitis vinifera] gi|147777947|emb|CAN66798.1| hypothetical protein VITISV_044233 [Vitis vinifera]
CL6191.Contig2_DHA_Bulb	TAIR	AT5G16880.2	| Symbols: | Target of Myb protein 1 | chr5:5549658-5551274 FORWARD LENGTH=407
	IRGSP	Os02t0697300-01	ENTH/VHS domain containing protein.
	nr	ref|XP_002285602.1|	PREDICTED: TOM1-like protein 2 [Vitis vinifera]
CL6423.Contig1_DHA_Bulb	TAIR	AT1G49560.1	| Symbols: | Homeodomain-like superfamily protein | chr1:18342725-18344101 FORWARD LENGTH=333
	IRGSP	Os12t0586300-00	Myb-like DNA-binding domain, SHAQKYF class domain containing protein.
	nr	ref|NP_001067156.1|	Os12g0586300 [Oryza sativa Japonica Group] gi|77556938|gb|ABA99734.1| myb-like DNA-binding domain, SHAQKYF class family protein, expressed [Oryza sativa Japonica Group] gi|113649663|dbj|BAF30175.1| Os12g0586300 [Oryza sativa Japonica Group]
CL6585.Contig1_DHA_Bulb	TAIR	AT5G17300.1	| Symbols: RVE1 | Homeodomain-like superfamily protein | chr5:5690435-5692435 REVERSE LENGTH=387
	IRGSP	Os06t0728700-01	Homeodomain-like containing protein.
	nr	ref|NP_001146835.1|	LOC100280442 [Zea mays] gi|198444862|gb|ACH88347.1| MYB-like protein E1 [Zea mays]
CL664.Contig3_DHA_Bulb	TAIR	AT3G09600.2	| Symbols: | Homeodomain-like superfamily protein | chr3:2946459-2948200 FORWARD LENGTH=282
	IRGSP	Os06t0105800-02	Homeodomain-like containing protein.
	nr	gb|ABV02070.1|	transcription factor 1R-MYB1 [Chimonanthus praecox]
CL6784.Contig1_DHA_Bulb	TAIR	AT4G38620.1	| Symbols: ATMYB4, MYB4 | myb domain protein 4 | chr4:18053866-18054876 FORWARD LENGTH=282
	IRGSP	Os09t0538400-01	Similar to P-type R2R3 Myb protein (Fragment).
	nr	gb|EOX97694.1|	MYB domain class transcription factor [Theobroma cacao]
CL6784.Contig2_DHA_Bulb	TAIR	AT2G16720.1	| Symbols: MYB7, ATMYB7, ATY49 | myb domain protein 7 | chr2:7255669-7256550 REVERSE LENGTH=269
	IRGSP	Os09t0538400-01	Similar to P-type R2R3 Myb protein (Fragment).
	nr	gb|EOX97694.1|	MYB domain class transcription factor [Theobroma cacao]
CL787.Contig1_DHA_Bulb	TAIR	AT3G18100.3	| Symbols: MYB4R1 | myb domain protein 4r1 | chr3:6200689-6204583 FORWARD LENGTH=799
	IRGSP	--No_Hits--
	nr	ref|XP_002278062.2|	PREDICTED: uncharacterized protein LOC100268025 [Vitis vinifera]
CL854.Contig1_DHA_Bulb	TAIR	AT3G28910.1	| Symbols: ATMYB30, MYB30 | myb domain protein 30 | chr3:10911443-10912856 FORWARD LENGTH=323
	IRGSP	Os07t0629000-01	Similar to P-type R2R3 Myb protein (Fragment).
	nr	ref|XP_004489392.1|	PREDICTED: myb-related protein 306-like [Cicer arietinum]
CL854.Contig2_DHA_Bulb	TAIR	AT3G47600.1	| Symbols: MYB94, ATMYBCP70, ATMYB94 | myb domain protein 94 | chr3:17539627-17541035 REVERSE LENGTH=333
	IRGSP	Os08t0437300-00	Similar to Typical P-type R2R3 Myb protein (Fragment).
	nr	ref|NP_001242312.1|	uncharacterized protein LOC100807020 [Glycine max] gi|255639323|gb|ACU19959.1| unknown [Glycine max]
CL854.Contig3_DHA_Bulb	TAIR	AT5G62470.2	| Symbols: MYB96 | myb domain protein 96 | chr5:25079434-25080858 REVERSE LENGTH=352
	IRGSP	Os08t0437300-00	Similar to Typical P-type R2R3 Myb protein (Fragment).
	nr	ref|XP_002284926.1|	PREDICTED: myb-related protein 306 [Vitis vinifera]
CL854.Contig4_DHA_Bulb	TAIR	AT5G62470.2	| Symbols: MYB96 | myb domain protein 96 | chr5:25079434-25080858 REVERSE LENGTH=352
	IRGSP	Os08t0437300-00	Similar to Typical P-type R2R3 Myb protein (Fragment).
	nr	ref|XP_002284926.1|	PREDICTED: myb-related protein 306 [Vitis vinifera]
CL932.Contig1_DHA_Bulb	TAIR	AT3G61600.2	| Symbols: ATPOB1, POB1 | POZ/BTB containin G-protein 1 | chr3:22795704-22798069 FORWARD LENGTH=561
	IRGSP	Os06t0507400-01	Similar to GAMYB-binding protein (Fragment).
	nr	ref|XP_002279915.1|	PREDICTED: BTB/POZ domain-containing protein POB1-like [Vitis vinifera]
Unigene10657_DHA_Bulb	TAIR	AT4G01680.3	| Symbols: MYB55 | myb domain protein 55 | chr4:716401-717415 REVERSE LENGTH=241
	IRGSP	Os05t0140100-03	Myb transcription factor domain containing protein.
	nr	gb|AAO49411.1|AF485893_1	MYB2 [Dendrobium sp. XMW-2002-2]
Unigene10658_DHA_Bulb	TAIR	AT4G01680.3	| Symbols: MYB55 | myb domain protein 55 | chr4:716401-717415 REVERSE LENGTH=241
	IRGSP	Os05t0140100-03	Myb transcription factor domain containing protein.
	nr	gb|AAO49411.1|AF485893_1	MYB2 [Dendrobium sp. XMW-2002-2]
Unigene11192_DHA_Bulb	TAIR	AT2G03500.1	| Symbols: | Homeodomain-like superfamily protein | chr2:1059926-1062259 FORWARD LENGTH=432
	IRGSP	Os01t0176700-01	Myb-like DNA-binding domain, SHAQKYF class domain containing protein.
	nr	ref|XP_002308314.1|	predicted protein [Populus trichocarpa] gi|222854290|gb|EEE91837.1| predicted protein [Populus trichocarpa]
Unigene12118_DHA_Bulb	TAIR	AT1G49950.1	| Symbols: TRB1, ATTRB1 | telomere repeat binding factor 1 | chr1:18494439-18496713 REVERSE LENGTH=300
	IRGSP	Os01t0589300-01	Similar to Single myb histone 1.
	nr	ref|XP_003533091.1|	PREDICTED: uncharacterized protein LOC778173 isoform 1 [Glycine max] gi|356529014|ref|XP_003533092.1| PREDICTED: uncharacterized protein LOC778173 isoform 2 [Glycine max]
Unigene12185_DHA_Bulb	TAIR	AT3G27785.1	| Symbols: MYB118, ATMYB118, PGA37 | myb domain protein 118 | chr3:10288767-10290712 REVERSE LENGTH=437
	IRGSP	Os06t0162700-01	SANT domain, DNA binding domain containing protein.
	nr	ref|XP_004300902.1|	PREDICTED: transcription factor MYB98-like [Fragaria vesca subsp. vesca]
Unigene12306_DHA_Bulb	TAIR	AT3G11450.1	| Symbols: | DnaJ domain ;Myb-like DNA-binding domain | chr3:3605459-3607402 REVERSE LENGTH=647
	IRGSP	--No_Hits--
	nr	gb|EOY19501.1|	DnaJ domain,Myb-like DNA-binding domain [Theobroma cacao]
Unigene12433_DHA_Bulb	TAIR	AT5G02320.2	| Symbols: MYB3R-5 | myb domain protein 3r-5 | chr5:483445-486347 REVERSE LENGTH=548
	IRGSP	Os01t0841500-01	R1R2R3 MYB transcription factor, Stress tolerance
	nr	ref|XP_002456618.1|	hypothetical protein SORBIDRAFT_03g039470 [Sorghum bicolor] gi|241928593|gb|EES01738.1| hypothetical protein SORBIDRAFT_03g039470 [Sorghum bicolor]
Unigene12453_DHA_Bulb	TAIR	AT5G04760.1	| Symbols: | Duplicated homeodomain-like superfamily protein | chr5:1373752-1374529 REVERSE LENGTH=215
	IRGSP	Os05t0442400-01	Similar to MybSt1.
	nr	gb|AEV91177.1|	MYB-related protein [Triticum aestivum]
Unigene12462_DHA_Bulb	TAIR	AT3G11450.1	| Symbols: | DnaJ domain ;Myb-like DNA-binding domain | chr3:3605459-3607402 REVERSE LENGTH=647
	IRGSP	Os04t0377932-00	Similar to Gonidia forming protein GlsA.
	nr	dbj|BAH15356.1|	gonidia forming protein GlsA [Alstroemeria aurea]
Unigene12552_DHA_Bulb	TAIR	AT1G32240.1	| Symbols: KAN2 | Homeodomain-like superfamily protein | chr1:11625882-11630355 REVERSE LENGTH=388
	IRGSP	Os02t0696900-00	Myb-like DNA-binding domain, SHAQKYF class domain containing protein.
	nr	ref|XP_002272637.1|	PREDICTED: probable transcription factor KAN2-like [Vitis vinifera]
Unigene12657_DHA_Bulb	TAIR	AT3G24490.1	| Symbols: | Alcohol dehydrogenase transcription factor Myb/SANT-like family protein | chr3:8911022-8912023 FORWARD LENGTH=333
	IRGSP	Os01t0718900-01	MADF domain domain containing protein.
	nr	ref|XP_004141778.1|	PREDICTED: uncharacterized protein LOC101223116 [Cucumis sativus] gi|449522534|ref|XP_004168281.1| PREDICTED: uncharacterized protein LOC101226171 [Cucumis sativus]
Unigene13030_DHA_Bulb	TAIR	AT1G77180.3	| Symbols: SKIP | chromatin protein family | chr1:28999791-29001632 REVERSE LENGTH=511
	IRGSP	Os02t0759800-01	Similar to GAMYB-binding protein (Fragment).
	nr	ref|NP_001048184.1|	Os02g0759800 [Oryza sativa Japonica Group] gi|47497360|dbj|BAD19399.1| putative GAMYB-binding protein [Oryza sativa Japonica Group] gi|113537715|dbj|BAF10098.1| Os02g0759800 [Oryza sativa Japonica Group] gi|125541209|gb|EAY87604.1| hypothetical protein OsI_09015 [Oryza sativa Indica Group] gi|125583761|gb|EAZ24692.1| hypothetical protein OsJ_08462 [Oryza sativa Japonica Group]
Unigene13415_DHA_Bulb	TAIR	AT2G36960.2	| Symbols: TKI1 | TSL-kinase interacting protein 1 | chr2:15523552-15527245 FORWARD LENGTH=741
	IRGSP	Os03t0241100-03	Myb, DNA-binding domain containing protein.
	nr	ref|XP_002276884.2|	PREDICTED: TSL-kinase interacting protein 1-like [Vitis vinifera]
Unigene13426_DHA_Bulb	TAIR	AT2G47460.1	| Symbols: MYB12, ATMYB12, PFG1 | myb domain protein 12 | chr2:19476438-19479242 FORWARD LENGTH=371
	IRGSP	Os01t0305900-01	Similar to R2R3 Myb transcription factor MYB-IF35.
	nr	ref|XP_002269995.1|	PREDICTED: transcription factor MYB12 [Vitis vinifera] gi|297743957|emb|CBI36927.3| unnamed protein product [Vitis vinifera]
Unigene13802_DHA_Bulb	TAIR	AT1G49950.1	| Symbols: TRB1, ATTRB1 | telomere repeat binding factor 1 | chr1:18494439-18496713 REVERSE LENGTH=300
	IRGSP	Os01t0589300-01	Similar to Single myb histone 1.
	nr	gb|EMJ03042.1|	hypothetical protein PRUPE_ppa011492mg [Prunus persica]
Unigene13923_DHA_Bulb	TAIR	--No_Hits--
	IRGSP	Os12t0207200-01	Myb/SANT-like domain domain containing protein.
	nr	ref|XP_003518028.1|	PREDICTED: uncharacterized protein At2g29880-like [Glycine max]
Unigene14025_DHA_Bulb	TAIR	AT3G23250.1	| Symbols: MYB15, ATY19, ATMYB15 | myb domain protein 15 | chr3:8309492-8310624 FORWARD LENGTH=285
	IRGSP	Os02t0624300-01	Similar to Y19 protein.
	nr	gb|ABI84253.1|	transcription factor Myb1 [Arachis hypogaea]
Unigene14446_DHA_Bulb	TAIR	AT1G14350.2	| Symbols: FLP, MYB124 | Duplicated homeodomain-like superfamily protein | chr1:4908427-4910647 FORWARD LENGTH=436
	IRGSP	Os07t0627300-01	Similar to Myb-related protein B (B-Myb).
	nr	ref|XP_004490015.1|	PREDICTED: transcriptional activator Myb-like [Cicer arietinum]
Unigene14784_DHA_Bulb	TAIR	AT5G49330.1	| Symbols: MYB111, ATMYB111, PFG3 | myb domain protein 111 | chr5:19999147-20001293 REVERSE LENGTH=342
	IRGSP	Os01t0874300-01	Similar to MybHv5 (Fragment).
	nr	ref|XP_004134499.1|	PREDICTED: transcription factor MYB12-like [Cucumis sativus] gi|449503843|ref|XP_004162204.1| PREDICTED: transcription factor MYB12-like [Cucumis sativus]
Unigene15105_DHA_Bulb	TAIR	AT1G08810.1	| Symbols: MYB60, AtMYB60 | myb domain protein 60 | chr1:2819279-2820329 REVERSE LENGTH=280
	IRGSP	Os11t0558200-01	Similar to P-type R2R3 Myb protein (Fragment).
	nr	ref|XP_003520923.1|	PREDICTED: myb-related protein 306-like [Glycine max]
Unigene16556_DHA_Bulb	TAIR	AT1G49950.1	| Symbols: TRB1, ATTRB1 | telomere repeat binding factor 1 | chr1:18494439-18496713 REVERSE LENGTH=300
	IRGSP	Os12t0613300-02	Similar to Single myb histone 6.
	nr	gb|EMJ03042.1|	hypothetical protein PRUPE_ppa011492mg [Prunus persica]
Unigene16557_DHA_Bulb	TAIR	AT1G49950.1	| Symbols: TRB1, ATTRB1 | telomere repeat binding factor 1 | chr1:18494439-18496713 REVERSE LENGTH=300
	IRGSP	Os12t0613300-02	Similar to Single myb histone 6.
	nr	ref|XP_002266866.2|	PREDICTED: uncharacterized protein LOC100261713 [Vitis vinifera] gi|296083034|emb|CBI22438.3| unnamed protein product [Vitis vinifera]
Unigene16936_DHA_Bulb	TAIR	AT1G56160.1	| Symbols: ATMYB72, MYB72 | myb domain protein 72 | chr1:21022384-21023444 FORWARD LENGTH=296
	IRGSP	Os04t0594100-01	Similar to P-type R2R3 Myb protein (Fragment).
	nr	gb|EAZ31836.1|	hypothetical protein OsJ_15997 [Oryza sativa Japonica Group]
Unigene17049_DHA_Bulb	TAIR	AT5G16770.2	| Symbols: AtMYB9, MYB9 | myb domain protein 9 | chr5:5515209-5516734 FORWARD LENGTH=336
	IRGSP	--No_Hits--
	nr	--No_Hits--
Unigene17337_DHA_Bulb	TAIR	AT1G68320.1	| Symbols: MYB62, AtMYB62, BW62B, BW62C | myb domain protein 62 | chr1:25603842-25604884 FORWARD LENGTH=286
	IRGSP	Os01t0128000-01	Myb transcription factor domain containing protein.
	nr	emb|CBI27001.3|	unnamed protein product [Vitis vinifera]
Unigene17693_DHA_Bulb	TAIR	AT1G72650.2	| Symbols: TRFL6 | TRF-like 6 | chr1:27350253-27353483 FORWARD LENGTH=630
	IRGSP	Os02t0776700-03	Hypothetical conserved gene.
	nr	gb|AFW73719.1|	putative MYB DNA-binding domain superfamily protein [Zea mays]
Unigene18727_DHA_Bulb	TAIR	AT5G62470.2	| Symbols: MYB96 | myb domain protein 96 | chr5:25079434-25080858 REVERSE LENGTH=352
	IRGSP	Os08t0437300-00	Similar to Typical P-type R2R3 Myb protein (Fragment).
	nr	ref|XP_004236011.1|	PREDICTED: myb-related protein 306-like [Solanum lycopersicum]
Unigene19056_DHA_Bulb	TAIR	AT4G32730.2	| Symbols: PC-MYB1, MYB3R-1, ATMYB3R-1, ATMYB3R1 | Homeodomain-like protein | chr4:15791039-15795643 FORWARD LENGTH=995
	IRGSP	Os12t0238000-00	SANT domain, DNA binding domain containing protein.
	nr	ref|XP_002280843.2|	PREDICTED: myb-related protein 3R-1-like [Vitis vinifera]
Unigene19649_DHA_Bulb	TAIR	--No_Hits--
	IRGSP	Os04t0676700-02	Similar to H0101F08.8 protein.
	nr	gb|EMT15082.1|	Myb-like protein J [Aegilops tauschii]
Unigene20088_DHA_Bulb	TAIR	AT1G79430.2	| Symbols: APL, WDY | Homeodomain-like superfamily protein | chr1:29877521-29879135 REVERSE LENGTH=358
	IRGSP	Os02t0174000-00	Myb-like DNA-binding domain, SHAQKYF class domain containing protein.
	nr	ref|XP_003531477.1|	PREDICTED: myb family transcription factor APL-like [Glycine max]
Unigene20831_DHA_Bulb	TAIR	AT1G66230.1	| Symbols: MYB20, AtMYB20 | myb domain protein 20 | chr1:24677322-24678246 FORWARD LENGTH=282
	IRGSP	Os09t0401000-01	Myb factor.
	nr	tpg|DAA49045.1|	TPA: putative MYB DNA-binding domain superfamily protein [Zea mays]
Unigene21007_DHA_Bulb	TAIR	AT4G19110.2	| Symbols: | Protein kinase superfamily protein | chr4:10454770-10457468 REVERSE LENGTH=464
	IRGSP	Os02t0700600-01	Similar to GAMYB-binding protein.
	nr	ref|XP_002265359.2|	PREDICTED: cyclin-dependent kinase F-4-like [Vitis vinifera] gi|296088459|emb|CBI37450.3| unnamed protein product [Vitis vinifera]
Unigene21092_DHA_Bulb	TAIR	AT4G18770.1	| Symbols: MYB98, AtMYB98 | myb domain protein 98 | chr4:10311068-10312557 FORWARD LENGTH=427
	IRGSP	Os06t0162700-01	SANT domain, DNA binding domain containing protein.
	nr	ref|XP_004155080.1|	PREDICTED: transcription factor MYB98-like [Cucumis sativus]
Unigene21128_DHA_Bulb	TAIR	AT2G44730.1	| Symbols: | Alcohol dehydrogenase transcription factor Myb/SANT-like family protein | chr2:18437447-18438565 REVERSE LENGTH=372
	IRGSP	Os10t0564200-01	Homeodomain-like containing protein.
	nr	ref|XP_002270272.1|	PREDICTED: uncharacterized protein LOC100263384 [Vitis vinifera]
Unigene21574_DHA_Bulb	TAIR	AT1G01060.4	| Symbols: LHY, LHY1 | Homeodomain-like superfamily protein | chr1:33992-37061 REVERSE LENGTH=644
	IRGSP	Os08t0157600-01	MYB transcription factor, Circadian clock
	nr	gb|EOX95556.1|	Homeodomain-like superfamily protein isoform 5 [Theobroma cacao] gi|508703664|gb|EOX95560.1| Homeodomain-like superfamily protein isoform 5 [Theobroma cacao] gi|508703665|gb|EOX95561.1| Homeodomain-like superfamily protein isoform 5 [Theobroma cacao]
Unigene22106_DHA_Bulb	TAIR	AT4G38620.1	| Symbols: ATMYB4, MYB4 | myb domain protein 4 | chr4:18053866-18054876 FORWARD LENGTH=282
	IRGSP	Os09t0538400-01	Similar to P-type R2R3 Myb protein (Fragment).
	nr	ref|XP_002534486.1|	r2r3-myb transcription factor, putative [Ricinus communis] gi|223525215|gb|EEF27899.1| r2r3-myb transcription factor, putative [Ricinus communis]
Unigene22107_DHA_Bulb	TAIR	--No_Hits--
	IRGSP	--No_Hits--
	nr	gb|AAS19479.1|	MYB5 [Tradescantia fluminensis]
Unigene22409_DHA_Bulb	TAIR	AT2G33610.1	| Symbols: ATSWI3B, CHB2, SWI3B | switch subunit 3 | chr2:14229023-14231149 FORWARD LENGTH=469
	IRGSP	Os04t0480300-01	Myb, DNA-binding domain containing protein.
	nr	gb|EAZ22070.1|	hypothetical protein OsJ_05733 [Oryza sativa Japonica Group]
Unigene22612_DHA_Bulb	TAIR	AT3G18100.3	| Symbols: MYB4R1 | myb domain protein 4r1 | chr3:6200689-6204583 FORWARD LENGTH=799
	IRGSP	--No_Hits--
	nr	ref|XP_004134260.1|	PREDICTED: uncharacterized protein LOC101216287 [Cucumis sativus]
Unigene22614_DHA_Bulb	TAIR	AT3G18100.3	| Symbols: MYB4R1 | myb domain protein 4r1 | chr3:6200689-6204583 FORWARD LENGTH=799
	IRGSP	Os12t0238000-00	SANT domain, DNA binding domain containing protein.
	nr	ref|XP_002278062.2|	PREDICTED: uncharacterized protein LOC100268025 [Vitis vinifera]
Unigene22869_DHA_Bulb	TAIR	AT4G18770.1	| Symbols: MYB98, AtMYB98 | myb domain protein 98 | chr4:10311068-10312557 FORWARD LENGTH=427
	IRGSP	Os06t0162700-01	SANT domain, DNA binding domain containing protein.
	nr	ref|XP_003633829.1|	PREDICTED: transcription factor MYB98-like [Vitis vinifera]
Unigene23808_DHA_Bulb	TAIR	AT2G47210.1	| Symbols: | myb-like transcription factor family protein | chr2:19379039-19382204 FORWARD LENGTH=441
	IRGSP	Os05t0540800-01	Homeodomain-like containing protein.
	nr	gb|AFW70679.1|	DNA methyltransferase 1-associated protein 1, partial [Zea mays]
Unigene23913_DHA_Bulb	TAIR	AT3G61600.2	| Symbols: ATPOB1, POB1 | POZ/BTB containin G-protein 1 | chr3:22795704-22798069 FORWARD LENGTH=561
	IRGSP	Os02t0260700-02	Similar to GAMYB-binding protein.
	nr	ref|NP_001142262.1|	uncharacterized protein LOC100274431 [Zea mays] gi|194695220|gb|ACF81694.1| unknown [Zea mays] gi|194707896|gb|ACF88032.1| unknown [Zea mays] gi|238010448|gb|ACR36259.1| unknown [Zea mays] gi|238015458|gb|ACR38764.1| unknown [Zea mays] gi|413936458|gb|AFW71009.1| hypothetical protein ZEAMMB73_641376 [Zea mays]
Unigene23914_DHA_Bulb	TAIR	AT3G61600.2	| Symbols: ATPOB1, POB1 | POZ/BTB containin G-protein 1 | chr3:22795704-22798069 FORWARD LENGTH=561
	IRGSP	Os06t0507400-01	Similar to GAMYB-binding protein (Fragment).
	nr	ref|NP_850733.1|	POZ/BTB containin G-protein 1 [Arabidopsis thaliana] gi|327488374|sp|Q9FPW6.2|POB1_ARATH RecName: Full=BTB/POZ domain-containing protein POB1; AltName: Full=POZ/BTB CONTAINING-PROTEIN 1; Short=AtPOB1 gi|332646708|gb|AEE80229.1| POZ/BTB containin G-protein 1 [Arabidopsis thaliana]
Unigene23942_DHA_Bulb	TAIR	AT3G13040.2	| Symbols: | myb-like HTH transcriptional regulator family protein | chr3:4172415-4174456 REVERSE LENGTH=449
	IRGSP	Os06t0703900-02	Homeodomain-like containing protein.
	nr	ref|NP_001058503.1|	Os06g0703900 [Oryza sativa Japonica Group] gi|53791923|dbj|BAD54045.1| putative transfactor [Oryza sativa Japonica Group] gi|113596543|dbj|BAF20417.1| Os06g0703900 [Oryza sativa Japonica Group] gi|215695487|dbj|BAG90678.1| unnamed protein product [Oryza sativa Japonica Group] gi|215765827|dbj|BAG87524.1| unnamed protein product [Oryza sativa Japonica Group] gi|222636186|gb|EEE66318.1| hypothetica…
Unigene24168_DHA_Bulb	TAIR	AT2G44430.1	| Symbols: | DNA-binding bromodomain-containing protein | chr2:18333603-18336165 FORWARD LENGTH=646
	IRGSP	Os08t0510700-01	Homeodomain-like containing protein.
	nr	gb|AEV91175.1|	MYB-related protein [Triticum aestivum]
Unigene24445_DHA_Bulb	TAIR	AT5G52660.1	| Symbols: | Homeodomain-like superfamily protein | chr5:21359423-21362037 REVERSE LENGTH=330
	IRGSP	Os02t0680700-01	Similar to DNA binding protein.
	nr	gb|ABV02070.1|	transcription factor 1R-MYB1 [Chimonanthus praecox]
Unigene24463_DHA_Bulb	TAIR	AT5G04900.1	| Symbols: NOL | NYC1-like | chr5:1434826-1437194 FORWARD LENGTH=348
	IRGSP	Os03t0654600-01	Similar to Myb-like DNA-binding domain, SHAQKYF class family protein, expressed.
	nr	ref|XP_004511171.1|	PREDICTED: chlorophyll(ide) b reductase NOL, chloroplastic-like [Cicer arietinum]
Unigene24529_DHA_Bulb	TAIR	AT3G61600.2	| Symbols: ATPOB1, POB1 | POZ/BTB containin G-protein 1 | chr3:22795704-22798069 FORWARD LENGTH=561
	IRGSP	Os06t0507400-01	Similar to GAMYB-binding protein (Fragment).
	nr	ref|XP_004298859.1|	PREDICTED: BTB/POZ domain-containing protein At2g46260-like [Fragaria vesca subsp. vesca]
Unigene24530_DHA_Bulb	TAIR	AT3G61600.2	| Symbols: ATPOB1, POB1 | POZ/BTB containin G-protein 1 | chr3:22795704-22798069 FORWARD LENGTH=561
	IRGSP	Os02t0260700-01	Similar to GAMYB-binding protein (Fragment).
	nr	ref|XP_002276076.2|	PREDICTED: BTB/POZ domain-containing protein POB1-like [Vitis vinifera]
Unigene24531_DHA_Bulb	TAIR	AT3G61600.2	| Symbols: ATPOB1, POB1 | POZ/BTB containin G-protein 1 | chr3:22795704-22798069 FORWARD LENGTH=561
	IRGSP	Os02t0260700-01	Similar to GAMYB-binding protein (Fragment).
	nr	ref|XP_002276076.2|	PREDICTED: BTB/POZ domain-containing protein POB1-like [Vitis vinifera]
Unigene24533_DHA_Bulb	TAIR	AT3G61600.2	| Symbols: ATPOB1, POB1 | POZ/BTB containin G-protein 1 | chr3:22795704-22798069 FORWARD LENGTH=561
	IRGSP	Os06t0507400-01	Similar to GAMYB-binding protein (Fragment).
	nr	gb|ACN26008.1|	unknown [Zea mays] gi|413944056|gb|AFW76705.1| GAMYB-binding protein [Zea mays]
Unigene24633_DHA_Bulb	TAIR	AT1G14350.2	| Symbols: FLP, MYB124 | Duplicated homeodomain-like superfamily protein | chr1:4908427-4910647 FORWARD LENGTH=436
	IRGSP	Os07t0627300-01	Similar to Myb-related protein B (B-Myb).
	nr	ref|XP_003553198.1|	PREDICTED: uncharacterized protein LOC100793723 [Glycine max]
Unigene24794_DHA_Bulb	TAIR	AT5G52660.2	| Symbols: | Homeodomain-like superfamily protein | chr5:21359423-21362037 REVERSE LENGTH=331
	IRGSP	Os02t0680700-01	Similar to DNA binding protein.
	nr	ref|XP_003622487.1|	MYB transcription factor MYB146 [Medicago truncatula] gi|355497502|gb|AES78705.1| MYB transcription factor MYB146 [Medicago truncatula]
Unigene24813_DHA_Bulb	TAIR	AT1G21700.1	| Symbols: ATSWI3C, CHB4, SWI3C | SWITCH/sucrose nonfermenting 3C | chr1:7620156-7623978 REVERSE LENGTH=807
	IRGSP	Os11t0183700-01	Myb, DNA-binding domain containing protein.
	nr	dbj|BAJ93481.1|	predicted protein [Hordeum vulgare subsp. vulgare]
Unigene24989_DHA_Bulb	TAIR	AT1G32240.1	| Symbols: KAN2 | Homeodomain-like superfamily protein | chr1:11625882-11630355 REVERSE LENGTH=388
	IRGSP	Os08t0160300-00	Similar to KANADI-like transcription factor FEATHERED.
	nr	ref|NP_001147919.1|	KANADI-like transcription factor FEATHERED [Zea mays] gi|195614592|gb|ACG29126.1| KANADI-like transcription factor FEATHERED [Zea mays] gi|413917330|gb|AFW57262.1| putative MYB DNA-binding domain superfamily protein [Zea mays]
Unigene25007_DHA_Bulb	TAIR	AT4G38620.1	| Symbols: ATMYB4, MYB4 | myb domain protein 4 | chr4:18053866-18054876 FORWARD LENGTH=282
	IRGSP	Os09t0538400-01	Similar to P-type R2R3 Myb protein (Fragment).
	nr	gb|EOX97694.1|	MYB domain class transcription factor [Theobroma cacao]
Unigene25008_DHA_Bulb	TAIR	AT3G01140.1	| Symbols: MYB106, NOK, AtMYB106 | myb domain protein 106 | chr3:46619-48143 REVERSE LENGTH=388
	IRGSP	Os04t0461000-01	Similar to Myb-related transcription factor LBM1.
	nr	dbj|BAM71806.1|	R2R3-MYB transcription factor [Gentiana triflora]
Unigene25406_DHA_Bulb	TAIR	AT5G06100.3	| Symbols: MYB33, ATMYB33 | myb domain protein 33 | chr5:1838555-1840386 FORWARD LENGTH=520
	IRGSP	Os01t0812000-03	Similar to cDNA clone:J033109N02, full insert sequence.
	nr	ref|XP_004306467.1|	PREDICTED: transcription factor GAMYB-like [Fragaria vesca subsp. vesca]
Unigene25407_DHA_Bulb	TAIR	AT5G06100.3	| Symbols: MYB33, ATMYB33 | myb domain protein 33 | chr5:1838555-1840386 FORWARD LENGTH=520
	IRGSP	Os01t0812000-03	Similar to cDNA clone:J033109N02, full insert sequence.
	nr	ref|XP_002525574.1|	r2r3-myb transcription factor, putative [Ricinus communis] gi|223535153|gb|EEF36833.1| r2r3-myb transcription factor, putative [Ricinus communis]
Unigene25703_DHA_Bulb	TAIR	AT1G09540.1	| Symbols: MYB61, ATMYB61 | myb domain protein 61 | chr1:3086333-3087689 FORWARD LENGTH=366
	IRGSP	Os01t0285300-01	Myb transcription factor domain containing protein.
	nr	gb|EOX95482.1|	Myb domain protein 55 [Theobroma cacao]
Unigene25705_DHA_Bulb	TAIR	AT3G13890.2	| Symbols: MYB26 | myb domain protein 26 | chr3:4576744-4578027 REVERSE LENGTH=358
	IRGSP	Os01t0702700-01	Similar to Transcription factor MYB86 (Myb-related protein 86) (AtMYB86) (Myb homolog 4) (AtMyb4).
	nr	gb|EOY20835.1|	Myb domain protein 86 [Theobroma cacao]
Unigene25706_DHA_Bulb	TAIR	AT4G01680.3	| Symbols: MYB55 | myb domain protein 55 | chr4:716401-717415 REVERSE LENGTH=241
	IRGSP	Os01t0285300-01	Myb transcription factor domain containing protein.
	nr	ref|NP_001242243.1|	MYB transcription factor MYB64 [Glycine max] gi|255642473|gb|ACU21500.1| unknown [Glycine max]
Unigene25742_DHA_Bulb	TAIR	AT3G47600.1	| Symbols: MYB94, ATMYBCP70, ATMYB94 | myb domain protein 94 | chr3:17539627-17541035 REVERSE LENGTH=333
	IRGSP	Os08t0437300-00	Similar to Typical P-type R2R3 Myb protein (Fragment).
	nr	ref|XP_003599668.1|	R2R3-MYB transcription factor [Medicago truncatula] gi|355488716|gb|AES69919.1| R2R3-MYB transcription factor [Medicago truncatula]
Unigene26256_DHA_Bulb	TAIR	AT2G47210.1	| Symbols: | myb-like transcription factor family protein | chr2:19379039-19382204 FORWARD LENGTH=441
	IRGSP	Os05t0540800-01	Homeodomain-like containing protein.
	nr	ref|XP_002278881.1|	PREDICTED: SWR1-complex protein 4 [Vitis vinifera] gi|297744019|emb|CBI36989.3| unnamed protein product [Vitis vinifera]
Unigene26257_DHA_Bulb	TAIR	AT2G47210.1	| Symbols: | myb-like transcription factor family protein | chr2:19379039-19382204 FORWARD LENGTH=441
	IRGSP	Os05t0540800-01	Homeodomain-like containing protein.
	nr	ref|XP_003554562.1|	PREDICTED: SWR1-complex protein 4-like [Glycine max]
Unigene27577_DHA_Bulb	TAIR	--No_Hits--
	IRGSP	Os02t0104500-01	MYB-like domain containing protein.
	nr	gb|AFW66826.1|	hypothetical protein ZEAMMB73_815554 [Zea mays]
Unigene27765_DHA_Bulb	TAIR	AT2G23290.1	| Symbols: AtMYB70, MYB70 | myb domain protein 70 | chr2:9904895-9905824 REVERSE LENGTH=309
	IRGSP	Os09t0106700-01	Similar to Myb proto-oncogene protein (C-myb).
	nr	emb|CBI19466.3|	unnamed protein product [Vitis vinifera]
Unigene27976_DHA_Bulb	TAIR	AT5G61620.1	| Symbols: | myb-like transcription factor family protein | chr5:24772383-24773507 FORWARD LENGTH=317
	IRGSP	Os01t0192300-01	Similar to I-box binding factor (Fragment).
	nr	ref|XP_002278155.1|	PREDICTED: transcription factor MYB1R1-like [Vitis vinifera]
Unigene27998_DHA_Bulb	TAIR	AT5G47390.1	| Symbols: | myb-like transcription factor family protein | chr5:19227001-19228546 FORWARD LENGTH=365
	IRGSP	Os10t0561400-02	Similar to Transcription factor MYBS3.
	nr	emb|CBY88798.1|	myb transcription factor [Humulus lupulus]
Unigene28096_DHA_Bulb	TAIR	AT1G70000.2	| Symbols: | myb-like transcription factor family protein | chr1:26363674-26364635 REVERSE LENGTH=261
	IRGSP	Os08t0151000-00	Similar to Myb-like DNA-binding domain, SHAQKYF class family protein.
	nr	ref|XP_003517881.1|	PREDICTED: transcription factor MYB1R1 [Glycine max]
Unigene28401_DHA_Bulb	TAIR	AT5G47390.1	| Symbols: | myb-like transcription factor family protein | chr5:19227001-19228546 FORWARD LENGTH=365
	IRGSP	Os10t0561400-02	Similar to Transcription factor MYBS3.
	nr	--No_Hits--
Unigene28530_DHA_Bulb	TAIR	AT1G49950.1	| Symbols: TRB1, ATTRB1 | telomere repeat binding factor 1 | chr1:18494439-18496713 REVERSE LENGTH=300
	IRGSP	Os01t0589300-01	Similar to Single myb histone 1.
	nr	gb|EMJ03042.1|	hypothetical protein PRUPE_ppa011492mg [Prunus persica]
Unigene28531_DHA_Bulb	TAIR	AT5G49620.1	| Symbols: AtMYB78, MYB78 | myb domain protein 78 | chr5:20137491-20139384 REVERSE LENGTH=307
	IRGSP	Os03t0315400-01	Similar to Typical P-type R2R3 Myb protein (Fragment).
	nr	ref|XP_004229031.1|	PREDICTED: transcription factor MYB21-like [Solanum lycopersicum]
Unigene28637_DHA_Bulb	TAIR	AT3G24490.1	| Symbols: | Alcohol dehydrogenase transcription factor Myb/SANT-like family protein | chr3:8911022-8912023 FORWARD LENGTH=333
	IRGSP	Os01t0718900-01	MADF domain domain containing protein.
	nr	ref|XP_002528196.1|	transcription factor, putative [Ricinus communis] gi|223532408|gb|EEF34203.1| transcription factor, putative [Ricinus communis]
Unigene28655_DHA_Bulb	TAIR	AT1G76890.2	| Symbols: GT2, AT-GT2 | Duplicated homeodomain-like superfamily protein | chr1:28873211-28875203 REVERSE LENGTH=575
	IRGSP	Os02t0104500-01	MYB-like domain containing protein.
	nr	ref|NP_001045613.1|	Os02g0104500 [Oryza sativa Japonica Group] gi|40363766|dbj|BAD06276.1| putative GT-2 factor [Oryza sativa Japonica Group] gi|41052544|dbj|BAD07536.1| putative GT-2 factor [Oryza sativa Japonica Group] gi|113535144|dbj|BAF07527.1| Os02g0104500 [Oryza sativa Japonica Group]
Unigene28918_DHA_Bulb	TAIR	AT4G28610.1	| Symbols: PHR1, AtPHR1 | phosphate starvation response 1 | chr4:14133164-14134951 REVERSE LENGTH=409
	IRGSP	Os03t0329900-01	MYB-CC family protein, Pi-starvation signaling
	nr	gb|AFK35281.1|	unknown [Medicago truncatula]
Unigene29020_DHA_Bulb	TAIR	--No_Hits--
	IRGSP	Os01t0229000-00	Similar to Transcription factor myb.
	nr	gb|EMT17114.1|	Myb-related protein 3R-1 [Aegilops tauschii]
Unigene29111_DHA_Bulb	TAIR	AT3G61600.2	| Symbols: ATPOB1, POB1 | POZ/BTB containin G-protein 1 | chr3:22795704-22798069 FORWARD LENGTH=561
	IRGSP	Os06t0507400-01	Similar to GAMYB-binding protein (Fragment).
	nr	ref|XP_002509901.1|	atpob1, putative [Ricinus communis] gi|223549800|gb|EEF51288.1| atpob1, putative [Ricinus communis]
Unigene29816_DHA_Bulb	TAIR	AT1G26780.2	| Symbols: MYB117, AtMYB117, LOF1 | myb domain protein 117 | chr1:9271033-9272463 FORWARD LENGTH=359
	IRGSP	Os01t0274800-01	R2R3-type MYB transcription factor, Sugar partitioning into anther
	nr	ref|XP_003517797.1|	PREDICTED: uncharacterized protein LOC100776292 [Glycine max]
Unigene30700_DHA_Bulb	TAIR	AT5G05090.1	| Symbols: | Homeodomain-like superfamily protein | chr5:1503393-1504193 FORWARD LENGTH=266
	IRGSP	Os01t0971800-00	Similar to Two-component response regulator ARR11 (Receiver-like protein 3).
	nr	ref|XP_002871136.1|	myb family transcription factor [Arabidopsis lyrata subsp. lyrata] gi|297316973|gb|EFH47395.1| myb family transcription factor [Arabidopsis lyrata subsp. lyrata]
Unigene31071_DHA_Bulb	TAIR	AT1G25550.1	| Symbols: | myb-like transcription factor family protein | chr1:8976644-8977942 FORWARD LENGTH=344
	IRGSP	Os12t0586300-00	Myb-like DNA-binding domain, SHAQKYF class domain containing protein.
	nr	gb|ABF70013.1|	myb DNA-binding domain-containing protein [Musa acuminata]
Unigene3204_DHA_Bulb	TAIR	AT5G16770.2	| Symbols: AtMYB9, MYB9 | myb domain protein 9 | chr5:5515209-5516734 FORWARD LENGTH=336
	IRGSP	Os06t0112700-00	Similar to Typical P-type R2R3 Myb protein (Fragment).
	nr	gb|EMT33018.1|	Transcription factor MYB39 [Aegilops tauschii]
Unigene33046_DHA_Bulb	TAIR	AT5G16880.2	| Symbols: | Target of Myb protein 1 | chr5:5549658-5551274 FORWARD LENGTH=407
	IRGSP	Os02t0697300-01	ENTH/VHS domain containing protein.
	nr	ref|XP_002325818.1|	predicted protein [Populus trichocarpa] gi|222862693|gb|EEF00200.1| predicted protein [Populus trichocarpa]
Unigene34660_DHA_Bulb	TAIR	AT4G13640.2	| Symbols: UNE16 | Homeodomain-like superfamily protein | chr4:7936864-7938497 REVERSE LENGTH=295
	IRGSP	Os02t0174000-00	Myb-like DNA-binding domain, SHAQKYF class domain containing protein.
	nr	gb|EOA17116.1|	hypothetical protein CARUB_v10005375mg [Capsella rubella]
Unigene3520_DHA_Bulb	TAIR	AT4G28610.1	| Symbols: PHR1, AtPHR1 | phosphate starvation response 1 | chr4:14133164-14134951 REVERSE LENGTH=409
	IRGSP	Os03t0329900-01	MYB-CC family protein, Pi-starvation signaling
	nr	--No_Hits--
Unigene37178_DHA_Bulb	TAIR	--No_Hits--
	IRGSP	Os02t0641900-01	Similar to P-type R2R3 Myb protein.
	nr	--No_Hits--
Unigene40770_DHA_Bulb	TAIR	AT5G16560.1	| Symbols: KAN, KAN1 | Homeodomain-like superfamily protein | chr5:5407365-5411092 REVERSE LENGTH=403
	IRGSP	Os09t0395300-00	Similar to myb-like DNA-binding domain, SHAQKYF class family protein.
	nr	ref|XP_003544358.1|	PREDICTED: transcription repressor KAN1-like [Glycine max]
Unigene4095_DHA_Bulb	TAIR	AT2G37630.1	| Symbols: ATPHAN, AS1, ATMYB91, MYB91 | myb-like HTH transcriptional regulator family protein | chr2:15781798-15782901 REVERSE LENGTH=367
	IRGSP	Os12t0572000-00	Similar to Protein rough sheath 2 homolog.
	nr	ref|NP_001067089.1|	Os12g0572000 [Oryza sativa Japonica Group] gi|75332239|sp|Q94IB1.1|RS2_ORYSJ RecName: Full=Protein rough sheath 2 homolog; AltName: Full=OsPHAN; AltName: Full=OsRS2; AltName: Full=Protein PHANTASTICA homolog gi|14588604|dbj|BAB61618.1| transcription factor rough sheath 2 like protein [Oryza sativa Japonica Group] gi|77556874|gb|ABA99670.1| Myb-like DNA-binding domain containing protein, expressed…
Unigene442_DHA_Bulb	TAIR	AT2G44430.1	| Symbols: | DNA-binding bromodomain-containing protein | chr2:18333603-18336165 FORWARD LENGTH=646
	IRGSP	Os08t0510700-01	Homeodomain-like containing protein.
	nr	gb|AEV91175.1|	MYB-related protein [Triticum aestivum]
Unigene473_DHA_Bulb	TAIR	AT5G41020.1	| Symbols: | myb family transcription factor | chr5:16425883-16427649 REVERSE LENGTH=588
	IRGSP	Os06t0303700-00	Similar to Myb-like DNA-binding domain containing protein.
	nr	ref|XP_004234316.1|	PREDICTED: uncharacterized protein LOC101250866 [Solanum lycopersicum]
Unigene4768_DHA_Bulb	TAIR	AT3G28910.1	| Symbols: ATMYB30, MYB30 | myb domain protein 30 | chr3:10911443-10912856 FORWARD LENGTH=323
	IRGSP	Os08t0437300-00	Similar to Typical P-type R2R3 Myb protein (Fragment).
	nr	ref|XP_002284926.1|	PREDICTED: myb-related protein 306 [Vitis vinifera]
Unigene5428_DHA_Bulb	TAIR	AT5G18240.4	| Symbols: MYR1 | myb-related protein 1 | chr5:6028617-6030573 REVERSE LENGTH=402
	IRGSP	Os03t0325500-01	Similar to Phosphate starvation regulator protein (Regulatory protein of P- starvation acclimation response Psr1).
	nr	ref|NP_001049984.1|	Os03g0325500 [Oryza sativa Japonica Group] gi|108707913|gb|ABF95708.1| transfactor, putative, expressed [Oryza sativa Japonica Group] gi|113548455|dbj|BAF11898.1| Os03g0325500 [Oryza sativa Japonica Group] gi|125586104|gb|EAZ26768.1| hypothetical protein OsJ_10679 [Oryza sativa Japonica Group]
Unigene5433_DHA_Bulb	TAIR	AT1G79430.2	| Symbols: APL, WDY | Homeodomain-like superfamily protein | chr1:29877521-29879135 REVERSE LENGTH=358
	IRGSP	Os09t0299000-01	Similar to CDPK substrate protein 1.
	nr	ref|XP_003577957.1|	PREDICTED: myb family transcription factor APL-like [Brachypodium distachyon]
Unigene5544_DHA_Bulb	TAIR	AT4G34430.2	| Symbols: CHB3, ATSWI3D | DNA-binding family protein | chr4:16461069-16464993 FORWARD LENGTH=985
	IRGSP	Os04t0110300-02	Myb, DNA-binding domain containing protein.
	nr	dbj|BAJ94102.1|	predicted protein [Hordeum vulgare subsp. vulgare]
Unigene5545_DHA_Bulb	TAIR	AT4G34430.2	| Symbols: CHB3, ATSWI3D | DNA-binding family protein | chr4:16461069-16464993 FORWARD LENGTH=985
	IRGSP	Os04t0110300-02	Myb, DNA-binding domain containing protein.
	nr	emb|CBI32576.3|	unnamed protein product [Vitis vinifera]
Unigene5860_DHA_Bulb	TAIR	AT1G09770.1	| Symbols: ATCDC5, CDC5, ATMYBCDC5 | cell division cycle 5 | chr1:3162002-3165122 FORWARD LENGTH=844
	IRGSP	Os04t0348300-01	Similar to OSIGBa0130K07.8 protein.
	nr	gb|EOY10931.1|	Cell division cycle 5 isoform 3 [Theobroma cacao]
Unigene5866_DHA_Bulb	TAIR	AT2G03500.1	| Symbols: | Homeodomain-like superfamily protein | chr2:1059926-1062259 FORWARD LENGTH=432
	IRGSP	Os01t0176700-01	Myb-like DNA-binding domain, SHAQKYF class domain containing protein.
	nr	ref|XP_004508555.1|	PREDICTED: uncharacterized protein LOC101500047 [Cicer arietinum]
Unigene5948_DHA_Bulb	TAIR	AT3G12720.1	| Symbols: ATY53, ATMYB67, MYB67 | myb domain protein 67 | chr3:4043407-4044522 REVERSE LENGTH=307
	IRGSP	Os07t0497500-00	Similar to MYB transcription factor.
	nr	ref|XP_003560182.1|	PREDICTED: transcription factor GAMYB-like [Brachypodium distachyon]
Unigene604_DHA_Bulb	TAIR	AT2G47620.1	| Symbols: ATSWI3A, CHB1, SWI3A | SWITCH/sucrose nonfermenting 3A | chr2:19532034-19534251 FORWARD LENGTH=512
	IRGSP	Os04t0480300-01	Myb, DNA-binding domain containing protein.
	nr	gb|EMS47728.1|	SWI/SNF complex subunit SWI3A [Triticum urartu]
Unigene6271_DHA_Bulb	TAIR	AT1G09540.1	| Symbols: MYB61, ATMYB61 | myb domain protein 61 | chr1:3086333-3087689 FORWARD LENGTH=366
	IRGSP	Os05t0140100-03	Myb transcription factor domain containing protein.
	nr	gb|AFH03054.1|	R2R3-MYB transcription factor MYB2 [Epimedium sagittatum]
Unigene6276_DHA_Bulb	TAIR	AT1G26780.2	| Symbols: MYB117, AtMYB117, LOF1 | myb domain protein 117 | chr1:9271033-9272463 FORWARD LENGTH=359
	IRGSP	Os08t0435700-00	Similar to MYB domain class transcription factor.
	nr	ref|XP_002269342.2|	PREDICTED: uncharacterized protein LOC100253313 [Vitis vinifera]
Unigene6478_DHA_Bulb	TAIR	--No_Hits--
	IRGSP	Os12t0207200-01	Myb/SANT-like domain domain containing protein.
	nr	ref|XP_003630954.1|	PIF-like protein [Medicago truncatula] gi|357521343|ref|XP_003630960.1| PIF-like protein [Medicago truncatula] gi|355524976|gb|AET05430.1| PIF-like protein [Medicago truncatula] gi|355524982|gb|AET05436.1| PIF-like protein [Medicago truncatula]
Unigene6528_DHA_Bulb	TAIR	AT1G25550.1	| Symbols: | myb-like transcription factor family protein | chr1:8976644-8977942 FORWARD LENGTH=344
	IRGSP	Os02t0325600-02	Similar to Phosphate starvation response regulator-like protein.
	nr	ref|XP_002281762.2|	PREDICTED: uncharacterized protein LOC100257723 isoform 1 [Vitis vinifera]
Unigene6731_DHA_Bulb	TAIR	AT1G49950.1	| Symbols: TRB1, ATTRB1 | telomere repeat binding factor 1 | chr1:18494439-18496713 REVERSE LENGTH=300
	IRGSP	Os12t0613300-02	Similar to Single myb histone 6.
	nr	ref|XP_002525279.1|	Histone H1.1, putative [Ricinus communis] gi|223535437|gb|EEF37107.1| Histone H1.1, putative [Ricinus communis]
Unigene6823_DHA_Bulb	TAIR	--No_Hits--
	IRGSP	Os10t0561400-03	Similar to Myb transcription factor.
	nr	gb|AEK05512.1|	MYB transcription factor [Dimocarpus longan]
Unigene6950_DHA_Bulb	TAIR	AT4G05100.1	| Symbols: AtMYB74, MYB74 | myb domain protein 74 | chr4:2618557-2619790 FORWARD LENGTH=324
	IRGSP	Os07t0558100-00	Similar to Myb-related transcription factor LBM1.
	nr	ref|XP_004232789.1|	PREDICTED: uncharacterized protein LOC101250764 [Solanum lycopersicum]
Unigene6951_DHA_Bulb	TAIR	AT4G21440.1	| Symbols: ATMYB102, ATM4, MYB102 | MYB-like 102 | chr4:11418425-11419652 REVERSE LENGTH=350
	IRGSP	Os07t0558100-00	Similar to Myb-related transcription factor LBM1.
	nr	ref|XP_004487343.1|	PREDICTED: transcription factor MYB39-like [Cicer arietinum]
Unigene8193_DHA_Bulb	TAIR	AT5G47390.1	| Symbols: | myb-like transcription factor family protein | chr5:19227001-19228546 FORWARD LENGTH=365
	IRGSP	Os10t0561400-02	Similar to Transcription factor MYBS3.
	nr	emb|CBI29498.3|	unnamed protein product [Vitis vinifera]
Unigene8211_DHA_Bulb	TAIR	AT3G02940.1	| Symbols: MYB107, AtMYB107 | myb domain protein 107 | chr3:662141-663830 FORWARD LENGTH=321
	IRGSP	Os06t0112700-00	Similar to Typical P-type R2R3 Myb protein (Fragment).
	nr	gb|EOY10110.1|	Myb domain protein 107 [Theobroma cacao]
Unigene840_DHA_Bulb	TAIR	AT2G47210.1	| Symbols: | myb-like transcription factor family protein | chr2:19379039-19382204 FORWARD LENGTH=441
	IRGSP	Os05t0540800-01	Homeodomain-like containing protein.
	nr	ref|XP_002278881.1|	PREDICTED: SWR1-complex protein 4 [Vitis vinifera] gi|297744019|emb|CBI36989.3| unnamed protein product [Vitis vinifera]
Unigene9342_DHA_Bulb	TAIR	AT4G37260.1	| Symbols: MYB73, ATMYB73 | myb domain protein 73 | chr4:17540602-17541564 FORWARD LENGTH=320
	IRGSP	Os06t0637500-02	Similar to MYB transcription factor R2R3 type.
	nr	gb|EMJ06721.1|	hypothetical protein PRUPE_ppa008450mg [Prunus persica]
Unigene9654_DHA_Bulb	TAIR	AT3G61600.2	| Symbols: ATPOB1, POB1 | POZ/BTB containin G-protein 1 | chr3:22795704-22798069 FORWARD LENGTH=561
	IRGSP	Os06t0507400-01	Similar to GAMYB-binding protein (Fragment).
	nr	ref|XP_004494778.1|	PREDICTED: BTB/POZ domain-containing protein POB1-like [Cicer arietinum]
Unigene9671_DHA_Bulb	TAIR	AT3G11450.1	| Symbols: | DnaJ domain ;Myb-like DNA-binding domain | chr3:3605459-3607402 REVERSE LENGTH=647
	IRGSP	--No_Hits--
	nr	dbj|BAH15356.1|	gonidia forming protein GlsA [Alstroemeria aurea]
CL1109.Contig3_DHC_Leaf	TAIR	AT5G52660.1	| Symbols: | Homeodomain-like superfamily protein | chr5:21359423-21362037 REVERSE LENGTH=330
	IRGSP	Os02t0680700-01	Similar to DNA binding protein.
	nr	gb|ABV02070.1|	transcription factor 1R-MYB1 [Chimonanthus praecox]
CL1109.Contig5_DHC_Leaf	TAIR	AT5G52660.2	| Symbols: | Homeodomain-like superfamily protein | chr5:21359423-21362037 REVERSE LENGTH=331
	IRGSP	Os02t0680700-01	Similar to DNA binding protein.
	nr	ref|XP_003622487.1|	MYB transcription factor MYB146 [Medicago truncatula] gi|355497502|gb|AES78705.1| MYB transcription factor MYB146 [Medicago truncatula]
CL1135.Contig1_DHC_Leaf	TAIR	AT4G32730.2	| Symbols: PC-MYB1, MYB3R-1, ATMYB3R-1, ATMYB3R1 | Homeodomain-like protein | chr4:15791039-15795643 FORWARD LENGTH=995
	IRGSP	Os12t0238000-00	SANT domain, DNA binding domain containing protein.
	nr	ref|XP_003636469.1|	C-myb-like transcription factor [Medicago truncatula] gi|355502404|gb|AES83607.1| C-myb-like transcription factor [Medicago truncatula]
CL1299.Contig1_DHC_Leaf	TAIR	AT5G16880.2	| Symbols: | Target of Myb protein 1 | chr5:5549658-5551274 FORWARD LENGTH=407
	IRGSP	Os02t0697300-01	ENTH/VHS domain containing protein.
	nr	ref|XP_002285602.1|	PREDICTED: TOM1-like protein 2 [Vitis vinifera]
CL1299.Contig2_DHC_Leaf	TAIR	AT5G16880.2	| Symbols: | Target of Myb protein 1 | chr5:5549658-5551274 FORWARD LENGTH=407
	IRGSP	Os02t0697300-01	ENTH/VHS domain containing protein.
	nr	ref|XP_002285602.1|	PREDICTED: TOM1-like protein 2 [Vitis vinifera]
CL1299.Contig3_DHC_Leaf	TAIR	AT5G16880.2	| Symbols: | Target of Myb protein 1 | chr5:5549658-5551274 FORWARD LENGTH=407
	IRGSP	Os02t0697300-01	ENTH/VHS domain containing protein.
	nr	ref|XP_002285602.1|	PREDICTED: TOM1-like protein 2 [Vitis vinifera]
CL1299.Contig4_DHC_Leaf	TAIR	AT5G16880.2	| Symbols: | Target of Myb protein 1 | chr5:5549658-5551274 FORWARD LENGTH=407
	IRGSP	Os02t0697300-01	ENTH/VHS domain containing protein.
	nr	ref|XP_002520034.1|	protein transporter, putative [Ricinus communis] gi|223540798|gb|EEF42358.1| protein transporter, putative [Ricinus communis]
CL1470.Contig1_DHC_Leaf	TAIR	AT3G47600.1	| Symbols: MYB94, ATMYBCP70, ATMYB94 | myb domain protein 94 | chr3:17539627-17541035 REVERSE LENGTH=333
	IRGSP	Os07t0629000-01	Similar to P-type R2R3 Myb protein (Fragment).
	nr	gb|EMT05173.1|	Myb-related protein 306 [Aegilops tauschii]
CL1470.Contig2_DHC_Leaf	TAIR	AT3G47600.1	| Symbols: MYB94, ATMYBCP70, ATMYB94 | myb domain protein 94 | chr3:17539627-17541035 REVERSE LENGTH=333
	IRGSP	Os08t0437300-00	Similar to Typical P-type R2R3 Myb protein (Fragment).
	nr	ref|NP_001242312.1|	uncharacterized protein LOC100807020 [Glycine max] gi|255639323|gb|ACU19959.1| unknown [Glycine max]
CL1470.Contig3_DHC_Leaf	TAIR	AT1G08810.1	| Symbols: MYB60, AtMYB60 | myb domain protein 60 | chr1:2819279-2820329 REVERSE LENGTH=280
	IRGSP	Os08t0437300-00	Similar to Typical P-type R2R3 Myb protein (Fragment).
	nr	ref|XP_003599668.1|	R2R3-MYB transcription factor [Medicago truncatula] gi|355488716|gb|AES69919.1| R2R3-MYB transcription factor [Medicago truncatula]
CL1470.Contig4_DHC_Leaf	TAIR	AT5G62470.2	| Symbols: MYB96 | myb domain protein 96 | chr5:25079434-25080858 REVERSE LENGTH=352
	IRGSP	Os08t0437300-00	Similar to Typical P-type R2R3 Myb protein (Fragment).
	nr	gb|EOA13601.1|	hypothetical protein CARUB_v10026666mg [Capsella rubella]
CL1470.Contig5_DHC_Leaf	TAIR	AT3G28910.1	| Symbols: ATMYB30, MYB30 | myb domain protein 30 | chr3:10911443-10912856 FORWARD LENGTH=323
	IRGSP	Os07t0629000-01	Similar to P-type R2R3 Myb protein (Fragment).
	nr	tpg|DAA40079.1|	TPA: putative MYB DNA-binding domain superfamily protein [Zea mays]
CL1470.Contig6_DHC_Leaf	TAIR	AT3G28910.1	| Symbols: ATMYB30, MYB30 | myb domain protein 30 | chr3:10911443-10912856 FORWARD LENGTH=323
	IRGSP	Os07t0629000-01	Similar to P-type R2R3 Myb protein (Fragment).
	nr	ref|XP_004489392.1|	PREDICTED: myb-related protein 306-like [Cicer arietinum]
CL1470.Contig7_DHC_Leaf	TAIR	AT3G28910.1	| Symbols: ATMYB30, MYB30 | myb domain protein 30 | chr3:10911443-10912856 FORWARD LENGTH=323
	IRGSP	Os08t0437300-00	Similar to Typical P-type R2R3 Myb protein (Fragment).
	nr	ref|XP_002284926.1|	PREDICTED: myb-related protein 306 [Vitis vinifera]
CL1470.Contig8_DHC_Leaf	TAIR	AT3G28910.1	| Symbols: ATMYB30, MYB30 | myb domain protein 30 | chr3:10911443-10912856 FORWARD LENGTH=323
	IRGSP	Os08t0437300-00	Similar to Typical P-type R2R3 Myb protein (Fragment).
	nr	ref|XP_002284926.1|	PREDICTED: myb-related protein 306 [Vitis vinifera]
CL235.Contig2_DHC_Leaf	TAIR	AT5G58900.1	| Symbols: | Homeodomain-like transcriptional regulator | chr5:23783275-23784667 REVERSE LENGTH=288
	IRGSP	Os01t0142500-01	Homeodomain-like containing protein.
	nr	gb|ACG28977.1|	MYB-like transcription factor DIVARICATA [Zea mays] gi|195645206|gb|ACG42071.1| MYB-like transcription factor DIVARICATA [Zea mays]
CL2351.Contig1_DHC_Leaf	TAIR	AT2G01060.1	| Symbols: | myb-like HTH transcriptional regulator family protein | chr2:73456-74902 REVERSE LENGTH=286
	IRGSP	Os06t0609500-01	Homeodomain-like containing protein.
	nr	ref|XP_002272588.2|	PREDICTED: uncharacterized protein LOC100248144 [Vitis vinifera]
CL2351.Contig2_DHC_Leaf	TAIR	AT2G01060.1	| Symbols: | myb-like HTH transcriptional regulator family protein | chr2:73456-74902 REVERSE LENGTH=286
	IRGSP	Os06t0609500-01	Homeodomain-like containing protein.
	nr	ref|XP_002272588.2|	PREDICTED: uncharacterized protein LOC100248144 [Vitis vinifera]
CL2351.Contig3_DHC_Leaf	TAIR	AT2G01060.1	| Symbols: | myb-like HTH transcriptional regulator family protein | chr2:73456-74902 REVERSE LENGTH=286
	IRGSP	Os09t0299200-01	Similar to MYB-CC type transfactor.
	nr	dbj|BAE46413.1|	MYB-CC type transfactor [Solanum tuberosum]
CL2351.Contig4_DHC_Leaf	TAIR	AT2G01060.1	| Symbols: | myb-like HTH transcriptional regulator family protein | chr2:73456-74902 REVERSE LENGTH=286
	IRGSP	Os09t0299200-01	Similar to MYB-CC type transfactor.
	nr	ref|XP_004293429.1|	PREDICTED: uncharacterized protein LOC101309129 isoform 1 [Fragaria vesca subsp. vesca]
CL2520.Contig1_DHC_Leaf	TAIR	AT2G01060.1	| Symbols: | myb-like HTH transcriptional regulator family protein | chr2:73456-74902 REVERSE LENGTH=286
	IRGSP	Os08t0346500-00	Transfactor-like protein.
	nr	dbj|BAE46413.1|	MYB-CC type transfactor [Solanum tuberosum]
CL2520.Contig2_DHC_Leaf	TAIR	AT2G01060.1	| Symbols: | myb-like HTH transcriptional regulator family protein | chr2:73456-74902 REVERSE LENGTH=286
	IRGSP	Os09t0299200-01	Similar to MYB-CC type transfactor.
	nr	ref|XP_002460002.1|	hypothetical protein SORBIDRAFT_02g020700 [Sorghum bicolor] gi|241923379|gb|EER96523.1| hypothetical protein SORBIDRAFT_02g020700 [Sorghum bicolor]
CL2822.Contig1_DHC_Leaf	TAIR	AT3G11450.1	| Symbols: | DnaJ domain ;Myb-like DNA-binding domain | chr3:3605459-3607402 REVERSE LENGTH=647
	IRGSP	Os04t0377932-00	Similar to Gonidia forming protein GlsA.
	nr	dbj|BAH15356.1|	gonidia forming protein GlsA [Alstroemeria aurea]
CL2822.Contig2_DHC_Leaf	TAIR	AT3G11450.1	| Symbols: | DnaJ domain ;Myb-like DNA-binding domain | chr3:3605459-3607402 REVERSE LENGTH=647
	IRGSP	Os04t0377932-00	Similar to Gonidia forming protein GlsA.
	nr	dbj|BAH15356.1|	gonidia forming protein GlsA [Alstroemeria aurea]
CL2925.Contig1_DHC_Leaf	TAIR	AT1G49950.1	| Symbols: TRB1, ATTRB1 | telomere repeat binding factor 1 | chr1:18494439-18496713 REVERSE LENGTH=300
	IRGSP	Os01t0589300-01	Similar to Single myb histone 1.
	nr	gb|EMJ03042.1|	hypothetical protein PRUPE_ppa011492mg [Prunus persica]
CL2925.Contig2_DHC_Leaf	TAIR	AT1G49950.1	| Symbols: TRB1, ATTRB1 | telomere repeat binding factor 1 | chr1:18494439-18496713 REVERSE LENGTH=300
	IRGSP	Os01t0589300-01	Similar to Single myb histone 1.
	nr	gb|EMJ03042.1|	hypothetical protein PRUPE_ppa011492mg [Prunus persica]
CL3318.Contig1_DHC_Leaf	TAIR	AT2G46260.1	| Symbols: | BTB/POZ/Kelch-associated protein | chr2:18996111-18998463 FORWARD LENGTH=561
	IRGSP	Os02t0260700-01	Similar to GAMYB-binding protein (Fragment).
	nr	ref|XP_002276076.2|	PREDICTED: BTB/POZ domain-containing protein POB1-like [Vitis vinifera]
CL3318.Contig2_DHC_Leaf	TAIR	AT3G61600.2	| Symbols: ATPOB1, POB1 | POZ/BTB containin G-protein 1 | chr3:22795704-22798069 FORWARD LENGTH=561
	IRGSP	Os06t0507400-01	Similar to GAMYB-binding protein (Fragment).
	nr	ref|XP_002279915.1|	PREDICTED: BTB/POZ domain-containing protein POB1-like [Vitis vinifera]
CL3318.Contig3_DHC_Leaf	TAIR	AT3G61600.2	| Symbols: ATPOB1, POB1 | POZ/BTB containin G-protein 1 | chr3:22795704-22798069 FORWARD LENGTH=561
	IRGSP	Os06t0507400-01	Similar to GAMYB-binding protein (Fragment).
	nr	ref|XP_002276076.2|	PREDICTED: BTB/POZ domain-containing protein POB1-like [Vitis vinifera]
CL3318.Contig4_DHC_Leaf	TAIR	AT2G46260.1	| Symbols: | BTB/POZ/Kelch-associated protein | chr2:18996111-18998463 FORWARD LENGTH=561
	IRGSP	Os02t0260700-02	Similar to GAMYB-binding protein.
	nr	ref|NP_001046484.1|	Os02g0260700 [Oryza sativa Japonica Group] gi|47497899|dbj|BAD20083.1| putative BTB/POZ domain-containing protein [Oryza sativa Japonica Group] gi|47497923|dbj|BAD20129.1| putative BTB/POZ domain-containing protein [Oryza sativa Japonica Group] gi|113536015|dbj|BAF08398.1| Os02g0260700 [Oryza sativa Japonica Group] gi|215704761|dbj|BAG94789.1| unnamed protein product [Oryza sativa Japonica Group]…
CL3624.Contig1_DHC_Leaf	TAIR	AT4G13020.3	| Symbols: MHK | Protein kinase superfamily protein | chr4:7604015-7606812 FORWARD LENGTH=444
	IRGSP	Os03t0847600-02	Similar to GAMYB-binding protein.
	nr	ref|NP_001140217.1|	uncharacterized LOC100272250 [Zea mays] gi|194696202|gb|ACF82185.1| unknown [Zea mays] gi|194697258|gb|ACF82713.1| unknown [Zea mays] gi|194698536|gb|ACF83352.1| unknown [Zea mays] gi|195640860|gb|ACG39898.1| serine/threonine-protein kinase MHK [Zea mays] gi|414873921|tpg|DAA52478.1| TPA: putative protein kinase superfamily protein isoform 1 [Zea mays] gi|414873922|tpg|DAA52479.1| TPA: putative p…
CL3749.Contig1_DHC_Leaf	TAIR	AT4G38620.1	| Symbols: ATMYB4, MYB4 | myb domain protein 4 | chr4:18053866-18054876 FORWARD LENGTH=282
	IRGSP	Os09t0538400-01	Similar to P-type R2R3 Myb protein (Fragment).
	nr	gb|AEX08668.1|	MYB transcription factor 3 [Malus x domestica]
CL3749.Contig2_DHC_Leaf	TAIR	AT4G38620.1	| Symbols: ATMYB4, MYB4 | myb domain protein 4 | chr4:18053866-18054876 FORWARD LENGTH=282
	IRGSP	Os09t0538400-01	Similar to P-type R2R3 Myb protein (Fragment).
	nr	gb|EOX97694.1|	MYB domain class transcription factor [Theobroma cacao]
CL3749.Contig3_DHC_Leaf	TAIR	AT4G38620.1	| Symbols: ATMYB4, MYB4 | myb domain protein 4 | chr4:18053866-18054876 FORWARD LENGTH=282
	IRGSP	Os09t0538400-01	Similar to P-type R2R3 Myb protein (Fragment).
	nr	ref|XP_004231034.1|	PREDICTED: myb-related protein 308-like [Solanum lycopersicum]
CL4080.Contig1_DHC_Leaf	TAIR	AT1G01060.3	| Symbols: LHY, LHY1 | Homeodomain-like superfamily protein | chr1:33992-37061 REVERSE LENGTH=645
	IRGSP	Os08t0157600-01	MYB transcription factor, Circadian clock
	nr	gb|EOX95556.1|	Homeodomain-like superfamily protein isoform 5 [Theobroma cacao] gi|508703664|gb|EOX95560.1| Homeodomain-like superfamily protein isoform 5 [Theobroma cacao] gi|508703665|gb|EOX95561.1| Homeodomain-like superfamily protein isoform 5 [Theobroma cacao]
CL4080.Contig2_DHC_Leaf	TAIR	AT1G01060.4	| Symbols: LHY, LHY1 | Homeodomain-like superfamily protein | chr1:33992-37061 REVERSE LENGTH=644
	IRGSP	Os08t0157600-01	MYB transcription factor, Circadian clock
	nr	gb|EOX95553.1|	Homeodomain-like superfamily protein isoform 2 [Theobroma cacao] gi|508703659|gb|EOX95555.1| Homeodomain-like superfamily protein isoform 2 [Theobroma cacao] gi|508703661|gb|EOX95557.1| Homeodomain-like superfamily protein isoform 2 [Theobroma cacao]
CL4143.Contig1_DHC_Leaf	TAIR	AT3G24490.1	| Symbols: | Alcohol dehydrogenase transcription factor Myb/SANT-like family protein | chr3:8911022-8912023 FORWARD LENGTH=333
	IRGSP	Os01t0718900-01	MADF domain domain containing protein.
	nr	ref|XP_004141778.1|	PREDICTED: uncharacterized protein LOC101223116 [Cucumis sativus] gi|449522534|ref|XP_004168281.1| PREDICTED: uncharacterized protein LOC101226171 [Cucumis sativus]
CL4150.Contig1_DHC_Leaf	TAIR	AT1G09770.1	| Symbols: ATCDC5, CDC5, ATMYBCDC5 | cell division cycle 5 | chr1:3162002-3165122 FORWARD LENGTH=844
	IRGSP	Os04t0348300-02	Similar to OSIGBa0130K07.8 protein.
	nr	ref|XP_002265478.1|	PREDICTED: cell division cycle 5-like protein [Vitis vinifera]
CL4150.Contig2_DHC_Leaf	TAIR	AT1G09770.1	| Symbols: ATCDC5, CDC5, ATMYBCDC5 | cell division cycle 5 | chr1:3162002-3165122 FORWARD LENGTH=844
	IRGSP	Os04t0348300-02	Similar to OSIGBa0130K07.8 protein.
	nr	ref|XP_002265478.1|	PREDICTED: cell division cycle 5-like protein [Vitis vinifera]
CL4216.Contig1_DHC_Leaf	TAIR	AT1G68670.1	| Symbols: | myb-like transcription factor family protein | chr1:25782344-25783873 FORWARD LENGTH=354
	IRGSP	Os12t0586300-00	Myb-like DNA-binding domain, SHAQKYF class domain containing protein.
	nr	gb|ABF70013.1|	myb DNA-binding domain-containing protein [Musa acuminata]
CL4216.Contig2_DHC_Leaf	TAIR	--No_Hits--
	IRGSP	--No_Hits--
	nr	gb|ABF70013.1|	myb DNA-binding domain-containing protein [Musa acuminata]
CL4240.Contig1_DHC_Leaf	TAIR	AT5G52660.1	| Symbols: | Homeodomain-like superfamily protein | chr5:21359423-21362037 REVERSE LENGTH=330
	IRGSP	Os02t0680700-01	Similar to DNA binding protein.
	nr	gb|ABV02070.1|	transcription factor 1R-MYB1 [Chimonanthus praecox]
CL4240.Contig2_DHC_Leaf	TAIR	AT5G52660.1	| Symbols: | Homeodomain-like superfamily protein | chr5:21359423-21362037 REVERSE LENGTH=330
	IRGSP	Os02t0680700-01	Similar to DNA binding protein.
	nr	gb|ABV02070.1|	transcription factor 1R-MYB1 [Chimonanthus praecox]
CL4325.Contig1_DHC_Leaf	TAIR	AT1G49950.1	| Symbols: TRB1, ATTRB1 | telomere repeat binding factor 1 | chr1:18494439-18496713 REVERSE LENGTH=300
	IRGSP	Os12t0613300-02	Similar to Single myb histone 6.
	nr	ref|XP_002525279.1|	Histone H1.1, putative [Ricinus communis] gi|223535437|gb|EEF37107.1| Histone H1.1, putative [Ricinus communis]
CL4341.Contig1_DHC_Leaf	TAIR	AT4G01680.3	| Symbols: MYB55 | myb domain protein 55 | chr4:716401-717415 REVERSE LENGTH=241
	IRGSP	Os05t0140100-03	Myb transcription factor domain containing protein.
	nr	gb|AFH03054.1|	R2R3-MYB transcription factor MYB2 [Epimedium sagittatum]
CL4341.Contig2_DHC_Leaf	TAIR	AT4G01680.3	| Symbols: MYB55 | myb domain protein 55 | chr4:716401-717415 REVERSE LENGTH=241
	IRGSP	Os05t0140100-03	Myb transcription factor domain containing protein.
	nr	gb|EOA20973.1|	hypothetical protein CARUB_v10001308mg [Capsella rubella]
CL4571.Contig3_DHC_Leaf	TAIR	AT5G18240.5	| Symbols: MYR1 | myb-related protein 1 | chr5:6028617-6030573 REVERSE LENGTH=400
	IRGSP	Os05t0488600-01	Similar to Phosphate starvation regulator protein (Regulatory protein of P- starvation acclimation response Psr1).
	nr	gb|EMT16442.1|	Myb family transcription factor APL [Aegilops tauschii]
CL4621.Contig1_DHC_Leaf	TAIR	AT1G66230.1	| Symbols: MYB20, AtMYB20 | myb domain protein 20 | chr1:24677322-24678246 FORWARD LENGTH=282
	IRGSP	Os09t0401000-01	Myb factor.
	nr	tpg|DAA49045.1|	TPA: putative MYB DNA-binding domain superfamily protein [Zea mays]
CL4786.Contig1_DHC_Leaf	TAIR	AT1G17520.1	| Symbols: | Homeodomain-like/winged-helix DNA-binding family protein | chr1:6024959-6027224 REVERSE LENGTH=296
	IRGSP	Os01t0708000-00	Similar to Single myb histone 4.
	nr	ref|XP_002281183.1|	PREDICTED: uncharacterized protein LOC100254369 [Vitis vinifera] gi|297738637|emb|CBI27882.3| unnamed protein product [Vitis vinifera]
CL4786.Contig2_DHC_Leaf	TAIR	AT1G17520.1	| Symbols: | Homeodomain-like/winged-helix DNA-binding family protein | chr1:6024959-6027224 REVERSE LENGTH=296
	IRGSP	Os01t0708000-00	Similar to Single myb histone 4.
	nr	ref|XP_002521373.1|	transcription factor, putative [Ricinus communis] gi|223539451|gb|EEF41041.1| transcription factor, putative [Ricinus communis]
CL5108.Contig1_DHC_Leaf	TAIR	AT5G04760.1	| Symbols: | Duplicated homeodomain-like superfamily protein | chr5:1373752-1374529 REVERSE LENGTH=215
	IRGSP	Os05t0442400-01	Similar to MybSt1.
	nr	gb|AEV91177.1|	MYB-related protein [Triticum aestivum]
CL5108.Contig2_DHC_Leaf	TAIR	AT5G04760.1	| Symbols: | Duplicated homeodomain-like superfamily protein | chr5:1373752-1374529 REVERSE LENGTH=215
	IRGSP	Os05t0442400-01	Similar to MybSt1.
	nr	gb|AEV91177.1|	MYB-related protein [Triticum aestivum]
CL5204.Contig2_DHC_Leaf	TAIR	AT2G46260.1	| Symbols: | BTB/POZ/Kelch-associated protein | chr2:18996111-18998463 FORWARD LENGTH=561
	IRGSP	Os06t0507400-01	Similar to GAMYB-binding protein (Fragment).
	nr	gb|EOY24916.1|	POZ/BTB containin G-protein 1 isoform 4 [Theobroma cacao]
CL5290.Contig1_DHC_Leaf	TAIR	AT5G04900.1	| Symbols: NOL | NYC1-like | chr5:1434826-1437194 FORWARD LENGTH=348
	IRGSP	Os03t0654600-01	Similar to Myb-like DNA-binding domain, SHAQKYF class family protein, expressed.
	nr	ref|XP_004511171.1|	PREDICTED: chlorophyll(ide) b reductase NOL, chloroplastic-like [Cicer arietinum]
CL5290.Contig2_DHC_Leaf	TAIR	AT5G04900.1	| Symbols: NOL | NYC1-like | chr5:1434826-1437194 FORWARD LENGTH=348
	IRGSP	Os03t0654600-01	Similar to Myb-like DNA-binding domain, SHAQKYF class family protein, expressed.
	nr	ref|XP_004306432.1|	PREDICTED: chlorophyll(ide) b reductase NOL, chloroplastic-like [Fragaria vesca subsp. vesca]
CL5509.Contig1_DHC_Leaf	TAIR	AT5G17300.1	| Symbols: RVE1 | Homeodomain-like superfamily protein | chr5:5690435-5692435 REVERSE LENGTH=387
	IRGSP	Os06t0728700-01	Homeodomain-like containing protein.
	nr	ref|NP_001146835.1|	LOC100280442 [Zea mays] gi|198444862|gb|ACH88347.1| MYB-like protein E1 [Zea mays]
CL5517.Contig1_DHC_Leaf	TAIR	AT4G19110.1	| Symbols: | Protein kinase superfamily protein | chr4:10454770-10457468 REVERSE LENGTH=461
	IRGSP	Os02t0700600-01	Similar to GAMYB-binding protein.
	nr	gb|EOY25312.1|	Kinase superfamily protein isoform 1 [Theobroma cacao] gi|508778057|gb|EOY25313.1| Kinase superfamily protein isoform 1 [Theobroma cacao]
CL6001.Contig1_DHC_Leaf	TAIR	AT4G01680.3	| Symbols: MYB55 | myb domain protein 55 | chr4:716401-717415 REVERSE LENGTH=241
	IRGSP	Os05t0140100-03	Myb transcription factor domain containing protein.
	nr	emb|CBI37044.3|	unnamed protein product [Vitis vinifera]
CL6001.Contig2_DHC_Leaf	TAIR	AT1G09540.1	| Symbols: MYB61, ATMYB61 | myb domain protein 61 | chr1:3086333-3087689 FORWARD LENGTH=366
	IRGSP	Os05t0140100-03	Myb transcription factor domain containing protein.
	nr	ref|XP_004135763.1|	PREDICTED: uncharacterized protein LOC101203786 [Cucumis sativus]
CL6072.Contig1_DHC_Leaf	TAIR	--No_Hits--
	IRGSP	Os12t0207200-01	Myb/SANT-like domain domain containing protein.
	nr	ref|XP_003518028.1|	PREDICTED: uncharacterized protein At2g29880-like [Glycine max]
CL63.Contig1_DHC_Leaf	TAIR	AT2G47210.1	| Symbols: | myb-like transcription factor family protein | chr2:19379039-19382204 FORWARD LENGTH=441
	IRGSP	Os05t0540800-01	Homeodomain-like containing protein.
	nr	gb|AFW70679.1|	DNA methyltransferase 1-associated protein 1, partial [Zea mays]
CL644.Contig1_DHC_Leaf	TAIR	AT3G23250.1	| Symbols: MYB15, ATY19, ATMYB15 | myb domain protein 15 | chr3:8309492-8310624 FORWARD LENGTH=285
	IRGSP	Os02t0624300-01	Similar to Y19 protein.
	nr	gb|EMJ23031.1|	hypothetical protein PRUPE_ppa020190mg [Prunus persica]
CL644.Contig2_DHC_Leaf	TAIR	AT3G23250.1	| Symbols: MYB15, ATY19, ATMYB15 | myb domain protein 15 | chr3:8309492-8310624 FORWARD LENGTH=285
	IRGSP	Os02t0624300-01	Similar to Y19 protein.
	nr	gb|EMJ23031.1|	hypothetical protein PRUPE_ppa020190mg [Prunus persica]
CL644.Contig3_DHC_Leaf	TAIR	AT3G23250.1	| Symbols: MYB15, ATY19, ATMYB15 | myb domain protein 15 | chr3:8309492-8310624 FORWARD LENGTH=285
	IRGSP	Os02t0624300-01	Similar to Y19 protein.
	nr	gb|EMJ23031.1|	hypothetical protein PRUPE_ppa020190mg [Prunus persica]
CL644.Contig4_DHC_Leaf	TAIR	AT3G23250.1	| Symbols: MYB15, ATY19, ATMYB15 | myb domain protein 15 | chr3:8309492-8310624 FORWARD LENGTH=285
	IRGSP	Os02t0624300-01	Similar to Y19 protein.
	nr	gb|EMJ23031.1|	hypothetical protein PRUPE_ppa020190mg [Prunus persica]
CL702.Contig1_DHC_Leaf	TAIR	AT1G70000.2	| Symbols: | myb-like transcription factor family protein | chr1:26363674-26364635 REVERSE LENGTH=261
	IRGSP	Os08t0151000-00	Similar to Myb-like DNA-binding domain, SHAQKYF class family protein.
	nr	ref|XP_003517881.1|	PREDICTED: transcription factor MYB1R1 [Glycine max]
CL702.Contig2_DHC_Leaf	TAIR	AT1G70000.2	| Symbols: | myb-like transcription factor family protein | chr1:26363674-26364635 REVERSE LENGTH=261
	IRGSP	Os08t0151000-00	Similar to Myb-like DNA-binding domain, SHAQKYF class family protein.
	nr	gb|EOY00277.1|	Myb-like transcription factor family protein [Theobroma cacao]
Unigene10132_DHC_Leaf	TAIR	AT2G44730.1	| Symbols: | Alcohol dehydrogenase transcription factor Myb/SANT-like family protein | chr2:18437447-18438565 REVERSE LENGTH=372
	IRGSP	Os10t0564200-01	Homeodomain-like containing protein.
	nr	ref|XP_002270272.1|	PREDICTED: uncharacterized protein LOC100263384 [Vitis vinifera]
Unigene10264_DHC_Leaf	TAIR	AT5G49620.1	| Symbols: AtMYB78, MYB78 | myb domain protein 78 | chr5:20137491-20139384 REVERSE LENGTH=307
	IRGSP	Os03t0315400-01	Similar to Typical P-type R2R3 Myb protein (Fragment).
	nr	emb|CCA29096.1|	putative MYB transcription factor [Rosa rugosa]
Unigene10611_DHC_Leaf	TAIR	AT2G38800.1	| Symbols: | Plant calmodulin-binding protein-related | chr2:16216999-16218837 FORWARD LENGTH=612
	IRGSP	Os05t0381600-01	Hypothetical conserved gene.
	nr	ref|XP_004499829.1|	PREDICTED: myb-like protein X-like [Cicer arietinum]
Unigene10746_DHC_Leaf	TAIR	AT5G02320.2	| Symbols: MYB3R-5 | myb domain protein 3r-5 | chr5:483445-486347 REVERSE LENGTH=548
	IRGSP	Os01t0841500-01	R1R2R3 MYB transcription factor, Stress tolerance
	nr	ref|XP_002456618.1|	hypothetical protein SORBIDRAFT_03g039470 [Sorghum bicolor] gi|241928593|gb|EES01738.1| hypothetical protein SORBIDRAFT_03g039470 [Sorghum bicolor]
Unigene11036_DHC_Leaf	TAIR	AT1G79430.2	| Symbols: APL, WDY | Homeodomain-like superfamily protein | chr1:29877521-29879135 REVERSE LENGTH=358
	IRGSP	Os09t0299000-01	Similar to CDPK substrate protein 1.
	nr	ref|XP_003577957.1|	PREDICTED: myb family transcription factor APL-like [Brachypodium distachyon]
Unigene11878_DHC_Leaf	TAIR	AT1G25550.1	| Symbols: | myb-like transcription factor family protein | chr1:8976644-8977942 FORWARD LENGTH=344
	IRGSP	Os02t0325600-02	Similar to Phosphate starvation response regulator-like protein.
	nr	ref|XP_002281762.2|	PREDICTED: uncharacterized protein LOC100257723 isoform 1 [Vitis vinifera]
Unigene12829_DHC_Leaf	TAIR	AT2G38090.1	| Symbols: | Duplicated homeodomain-like superfamily protein | chr2:15945278-15946775 FORWARD LENGTH=298
	IRGSP	Os05t0449900-01	Homeodomain-like containing protein.
	nr	gb|AFH03060.1|	R2R3-MYB transcription factor MYB8 [Epimedium sagittatum]
Unigene13053_DHC_Leaf	TAIR	AT5G47390.1	| Symbols: | myb-like transcription factor family protein | chr5:19227001-19228546 FORWARD LENGTH=365
	IRGSP	Os10t0561400-02	Similar to Transcription factor MYBS3.
	nr	ref|XP_004508939.1|	PREDICTED: transcription factor MYB1R1-like [Cicer arietinum]
Unigene13054_DHC_Leaf	TAIR	AT5G47390.1	| Symbols: | myb-like transcription factor family protein | chr5:19227001-19228546 FORWARD LENGTH=365
	IRGSP	Os10t0561400-02	Similar to Transcription factor MYBS3.
	nr	emb|CBY88798.1|	myb transcription factor [Humulus lupulus]
Unigene13090_DHC_Leaf	TAIR	AT4G37260.1	| Symbols: MYB73, ATMYB73 | myb domain protein 73 | chr4:17540602-17541564 FORWARD LENGTH=320
	IRGSP	Os06t0637500-02	Similar to MYB transcription factor R2R3 type.
	nr	gb|EMJ06721.1|	hypothetical protein PRUPE_ppa008450mg [Prunus persica]
Unigene13920_DHC_Leaf	TAIR	AT5G41020.1	| Symbols: | myb family transcription factor | chr5:16425883-16427649 REVERSE LENGTH=588
	IRGSP	Os06t0303700-00	Similar to Myb-like DNA-binding domain containing protein.
	nr	ref|XP_004234316.1|	PREDICTED: uncharacterized protein LOC101250866 [Solanum lycopersicum]
Unigene14009_DHC_Leaf	TAIR	AT4G00540.2	| Symbols: ATMYB3R2, PC-MYB2, MYB3R-2, MYB3R2 | myb domain protein 3r2 | chr4:235403-237356 REVERSE LENGTH=405
	IRGSP	Os05t0459000-01	Similar to Gag/env/c-myb protein (Fragment).
	nr	gb|EOX96058.1|	Homeodomain-like protein, putative [Theobroma cacao]
Unigene14247_DHC_Leaf	TAIR	AT1G21380.1	| Symbols: | Target of Myb protein 1 | chr1:7485806-7488032 REVERSE LENGTH=506
	IRGSP	Os11t0199700-02	Similar to Seed protein B32E (Fragment).
	nr	gb|EOY16496.1|	Target of Myb protein 1 isoform 1 [Theobroma cacao] gi|508724600|gb|EOY16497.1| Target of Myb protein 1 isoform 1 [Theobroma cacao]
Unigene14505_DHC_Leaf	TAIR	AT3G46130.1	| Symbols: ATMYB48, ATMYB48-3, MYB48 | myb domain protein 48 | chr3:16945433-16946376 FORWARD LENGTH=256
	IRGSP	Os12t0567300-00	Myb transcription factor domain containing protein.
	nr	gb|EMT32647.1|	Myb-related protein MYBAS2 [Aegilops tauschii]
Unigene14591_DHC_Leaf	TAIR	AT5G16770.2	| Symbols: AtMYB9, MYB9 | myb domain protein 9 | chr5:5515209-5516734 FORWARD LENGTH=336
	IRGSP	Os06t0112700-00	Similar to Typical P-type R2R3 Myb protein (Fragment).
	nr	ref|XP_002325389.1|	predicted protein [Populus trichocarpa] gi|222862264|gb|EEE99770.1| predicted protein [Populus trichocarpa]
Unigene15169_DHC_Leaf	TAIR	AT4G05100.1	| Symbols: AtMYB74, MYB74 | myb domain protein 74 | chr4:2618557-2619790 FORWARD LENGTH=324
	IRGSP	Os07t0558100-00	Similar to Myb-related transcription factor LBM1.
	nr	ref|XP_002266049.1|	PREDICTED: uncharacterized protein LOC100245492 [Vitis vinifera]
Unigene15519_DHC_Leaf	TAIR	--No_Hits--
	IRGSP	Os04t0480300-01	Myb, DNA-binding domain containing protein.
	nr	gb|EMS47728.1|	SWI/SNF complex subunit SWI3A [Triticum urartu]
Unigene15520_DHC_Leaf	TAIR	--No_Hits--
	IRGSP	Os04t0480300-01	Myb, DNA-binding domain containing protein.
	nr	gb|EEE61195.1|	hypothetical protein OsJ_15204 [Oryza sativa Japonica Group]
Unigene15553_DHC_Leaf	TAIR	--No_Hits--
	IRGSP	Os12t0207200-01	Myb/SANT-like domain domain containing protein.
	nr	ref|XP_003630954.1|	PIF-like protein [Medicago truncatula] gi|357521343|ref|XP_003630960.1| PIF-like protein [Medicago truncatula] gi|355524976|gb|AET05430.1| PIF-like protein [Medicago truncatula] gi|355524982|gb|AET05436.1| PIF-like protein [Medicago truncatula]
Unigene16286_DHC_Leaf	TAIR	AT3G11280.2	| Symbols: | Duplicated homeodomain-like superfamily protein | chr3:3533477-3534393 REVERSE LENGTH=263
	IRGSP	Os01t0853700-01	Similar to MCB1 protein.
	nr	gb|ADE22269.1|	MYB transcription factor [Malus x domestica]
Unigene17409_DHC_Leaf	TAIR	AT4G18770.1	| Symbols: MYB98, AtMYB98 | myb domain protein 98 | chr4:10311068-10312557 FORWARD LENGTH=427
	IRGSP	Os06t0162700-01	SANT domain, DNA binding domain containing protein.
	nr	ref|XP_004155080.1|	PREDICTED: transcription factor MYB98-like [Cucumis sativus]
Unigene17748_DHC_Leaf	TAIR	AT2G03500.1	| Symbols: | Homeodomain-like superfamily protein | chr2:1059926-1062259 FORWARD LENGTH=432
	IRGSP	Os01t0176700-01	Myb-like DNA-binding domain, SHAQKYF class domain containing protein.
	nr	ref|XP_004508555.1|	PREDICTED: uncharacterized protein LOC101500047 [Cicer arietinum]
Unigene17749_DHC_Leaf	TAIR	AT2G03500.1	| Symbols: | Homeodomain-like superfamily protein | chr2:1059926-1062259 FORWARD LENGTH=432
	IRGSP	Os01t0176700-01	Myb-like DNA-binding domain, SHAQKYF class domain containing protein.
	nr	ref|XP_004508555.1|	PREDICTED: uncharacterized protein LOC101500047 [Cicer arietinum]
Unigene17944_DHC_Leaf	TAIR	AT5G15310.2	| Symbols: ATMYB16, ATMIXTA, MYB16 | myb domain protein 16 | chr5:4974894-4976106 FORWARD LENGTH=315
	IRGSP	Os04t0461000-01	Similar to Myb-related transcription factor LBM1.
	nr	dbj|BAM71806.1|	R2R3-MYB transcription factor [Gentiana triflora]
Unigene17946_DHC_Leaf	TAIR	AT3G01140.1	| Symbols: MYB106, NOK, AtMYB106 | myb domain protein 106 | chr3:46619-48143 REVERSE LENGTH=388
	IRGSP	Os04t0461000-01	Similar to Myb-related transcription factor LBM1.
	nr	gb|EOY01854.1|	Myb domain protein 106, putative [Theobroma cacao]
Unigene18438_DHC_Leaf	TAIR	--No_Hits--
	IRGSP	Os01t0229000-00	Similar to Transcription factor myb.
	nr	gb|EMT17114.1|	Myb-related protein 3R-1 [Aegilops tauschii]
Unigene21572_DHC_Leaf	TAIR	AT3G61600.2	| Symbols: ATPOB1, POB1 | POZ/BTB containin G-protein 1 | chr3:22795704-22798069 FORWARD LENGTH=561
	IRGSP	Os06t0507400-01	Similar to GAMYB-binding protein (Fragment).
	nr	gb|EMT31791.1|	hypothetical protein F775_32011 [Aegilops tauschii]
Unigene22892_DHC_Leaf	TAIR	AT5G11510.2	| Symbols: MYB3R-4 | myb domain protein 3r-4 | chr5:3680452-3683633 FORWARD LENGTH=798
	IRGSP	Os12t0238000-00	SANT domain, DNA binding domain containing protein.
	nr	ref|XP_003636469.1|	C-myb-like transcription factor [Medicago truncatula] gi|355502404|gb|AES83607.1| C-myb-like transcription factor [Medicago truncatula]
Unigene23270_DHC_Leaf	TAIR	AT3G11440.1	| Symbols: ATMYB65, MYB65 | myb domain protein 65 | chr3:3603056-3604929 FORWARD LENGTH=553
	IRGSP	Os01t0812000-03	Similar to cDNA clone:J033109N02, full insert sequence.
	nr	ref|XP_002525574.1|	r2r3-myb transcription factor, putative [Ricinus communis] gi|223535153|gb|EEF36833.1| r2r3-myb transcription factor, putative [Ricinus communis]
Unigene23271_DHC_Leaf	TAIR	AT5G06100.3	| Symbols: MYB33, ATMYB33 | myb domain protein 33 | chr5:1838555-1840386 FORWARD LENGTH=520
	IRGSP	Os01t0812000-03	Similar to cDNA clone:J033109N02, full insert sequence.
	nr	ref|XP_002275846.1|	PREDICTED: transcription factor GAMYB [Vitis vinifera] gi|298205121|emb|CBI40642.3| unnamed protein product [Vitis vinifera]
Unigene23829_DHC_Leaf	TAIR	AT1G09770.1	| Symbols: ATCDC5, CDC5, ATMYBCDC5 | cell division cycle 5 | chr1:3162002-3165122 FORWARD LENGTH=844
	IRGSP	Os04t0348300-01	Similar to OSIGBa0130K07.8 protein.
	nr	emb|CAH66372.1|	OSIGBa0130K07.8 [Oryza sativa Indica Group]
Unigene23830_DHC_Leaf	TAIR	AT1G09770.1	| Symbols: ATCDC5, CDC5, ATMYBCDC5 | cell division cycle 5 | chr1:3162002-3165122 FORWARD LENGTH=844
	IRGSP	Os04t0348300-02	Similar to OSIGBa0130K07.8 protein.
	nr	gb|EOY10931.1|	Cell division cycle 5 isoform 3 [Theobroma cacao]
Unigene24302_DHC_Leaf	TAIR	AT1G77180.3	| Symbols: SKIP | chromatin protein family | chr1:28999791-29001632 REVERSE LENGTH=511
	IRGSP	Os02t0759800-01	Similar to GAMYB-binding protein (Fragment).
	nr	ref|NP_001048184.1|	Os02g0759800 [Oryza sativa Japonica Group] gi|47497360|dbj|BAD19399.1| putative GAMYB-binding protein [Oryza sativa Japonica Group] gi|113537715|dbj|BAF10098.1| Os02g0759800 [Oryza sativa Japonica Group] gi|125541209|gb|EAY87604.1| hypothetical protein OsI_09015 [Oryza sativa Indica Group] gi|125583761|gb|EAZ24692.1| hypothetical protein OsJ_08462 [Oryza sativa Japonica Group]
Unigene24377_DHC_Leaf	TAIR	AT1G06180.1	| Symbols: ATMYB13, ATMYBLFGN, MYB13 | myb domain protein 13 | chr1:1889510-1891089 FORWARD LENGTH=246
	IRGSP	Os02t0624300-01	Similar to Y19 protein.
	nr	gb|AFK39973.1|	unknown [Medicago truncatula]
Unigene24378_DHC_Leaf	TAIR	AT1G06180.1	| Symbols: ATMYB13, ATMYBLFGN, MYB13 | myb domain protein 13 | chr1:1889510-1891089 FORWARD LENGTH=246
	IRGSP	Os02t0624300-01	Similar to Y19 protein.
	nr	gb|AFK39973.1|	unknown [Medicago truncatula]
Unigene24379_DHC_Leaf	TAIR	AT2G31180.1	| Symbols: ATMYB14, MYB14AT, MYB14 | myb domain protein 14 | chr2:13286806-13288175 REVERSE LENGTH=249
	IRGSP	Os02t0624300-01	Similar to Y19 protein.
	nr	ref|XP_004289939.1|	PREDICTED: myb-related protein Myb4-like [Fragaria vesca subsp. vesca]
Unigene24428_DHC_Leaf	TAIR	AT5G12870.1	| Symbols: ATMYB46, MYB46 | myb domain protein 46 | chr5:4062939-4064939 REVERSE LENGTH=280
	IRGSP	Os01t0709000-01	Similar to Transcription factor MYB1.
	nr	--No_Hits--
Unigene25820_DHC_Leaf	TAIR	AT3G61600.2	| Symbols: ATPOB1, POB1 | POZ/BTB containin G-protein 1 | chr3:22795704-22798069 FORWARD LENGTH=561
	IRGSP	Os06t0507400-01	Similar to GAMYB-binding protein (Fragment).
	nr	ref|NP_850733.1|	POZ/BTB containin G-protein 1 [Arabidopsis thaliana] gi|327488374|sp|Q9FPW6.2|POB1_ARATH RecName: Full=BTB/POZ domain-containing protein POB1; AltName: Full=POZ/BTB CONTAINING-PROTEIN 1; Short=AtPOB1 gi|332646708|gb|AEE80229.1| POZ/BTB containin G-protein 1 [Arabidopsis thaliana]
Unigene25862_DHC_Leaf	TAIR	AT2G47210.1	| Symbols: | myb-like transcription factor family protein | chr2:19379039-19382204 FORWARD LENGTH=441
	IRGSP	Os05t0540800-01	Homeodomain-like containing protein.
	nr	ref|XP_002278881.1|	PREDICTED: SWR1-complex protein 4 [Vitis vinifera] gi|297744019|emb|CBI36989.3| unnamed protein product [Vitis vinifera]
Unigene2605_DHC_Leaf	TAIR	AT4G37260.1	| Symbols: MYB73, ATMYB73 | myb domain protein 73 | chr4:17540602-17541564 FORWARD LENGTH=320
	IRGSP	Os01t0850400-01	Similar to MYBY1 protein (Fragment).
	nr	ref|XP_003567272.1|	PREDICTED: uncharacterized protein LOC100827463 [Brachypodium distachyon]
Unigene26304_DHC_Leaf	TAIR	AT5G02320.2	| Symbols: MYB3R-5 | myb domain protein 3r-5 | chr5:483445-486347 REVERSE LENGTH=548
	IRGSP	Os01t0841500-01	R1R2R3 MYB transcription factor, Stress tolerance
	nr	emb|CBI30554.3|	unnamed protein product [Vitis vinifera]
Unigene26305_DHC_Leaf	TAIR	AT5G11510.2	| Symbols: MYB3R-4 | myb domain protein 3r-4 | chr5:3680452-3683633 FORWARD LENGTH=798
	IRGSP	Os01t0841500-01	R1R2R3 MYB transcription factor, Stress tolerance
	nr	gb|EOA19905.1|	hypothetical protein CARUB_v10000155mg [Capsella rubella]
Unigene26933_DHC_Leaf	TAIR	AT3G09600.2	| Symbols: | Homeodomain-like superfamily protein | chr3:2946459-2948200 FORWARD LENGTH=282
	IRGSP	Os06t0105800-02	Homeodomain-like containing protein.
	nr	gb|ABV02070.1|	transcription factor 1R-MYB1 [Chimonanthus praecox]
Unigene28249_DHC_Leaf	TAIR	AT1G49950.1	| Symbols: TRB1, ATTRB1 | telomere repeat binding factor 1 | chr1:18494439-18496713 REVERSE LENGTH=300
	IRGSP	Os12t0613300-02	Similar to Single myb histone 6.
	nr	ref|XP_002266866.2|	PREDICTED: uncharacterized protein LOC100261713 [Vitis vinifera] gi|296083034|emb|CBI22438.3| unnamed protein product [Vitis vinifera]
Unigene28250_DHC_Leaf	TAIR	AT1G49950.1	| Symbols: TRB1, ATTRB1 | telomere repeat binding factor 1 | chr1:18494439-18496713 REVERSE LENGTH=300
	IRGSP	Os01t0589300-01	Similar to Single myb histone 1.
	nr	gb|EMJ03042.1|	hypothetical protein PRUPE_ppa011492mg [Prunus persica]
Unigene28364_DHC_Leaf	TAIR	AT2G47460.1	| Symbols: MYB12, ATMYB12, PFG1 | myb domain protein 12 | chr2:19476438-19479242 FORWARD LENGTH=371
	IRGSP	Os01t0305900-01	Similar to R2R3 Myb transcription factor MYB-IF35.
	nr	ref|XP_004295109.1|	PREDICTED: uncharacterized protein LOC101291508 [Fragaria vesca subsp. vesca]
Unigene28365_DHC_Leaf	TAIR	AT2G47460.1	| Symbols: MYB12, ATMYB12, PFG1 | myb domain protein 12 | chr2:19476438-19479242 FORWARD LENGTH=371
	IRGSP	Os01t0305900-01	Similar to R2R3 Myb transcription factor MYB-IF35.
	nr	ref|XP_004295109.1|	PREDICTED: uncharacterized protein LOC101291508 [Fragaria vesca subsp. vesca]
Unigene28505_DHC_Leaf	TAIR	AT3G28910.1	| Symbols: ATMYB30, MYB30 | myb domain protein 30 | chr3:10911443-10912856 FORWARD LENGTH=323
	IRGSP	Os11t0558200-01	Similar to P-type R2R3 Myb protein (Fragment).
	nr	ref|XP_003549675.1|	PREDICTED: myb-related protein 306-like [Glycine max]
Unigene28506_DHC_Leaf	TAIR	AT1G08810.1	| Symbols: MYB60, AtMYB60 | myb domain protein 60 | chr1:2819279-2820329 REVERSE LENGTH=280
	IRGSP	Os07t0629000-01	Similar to P-type R2R3 Myb protein (Fragment).
	nr	ref|XP_003527079.1|	PREDICTED: myb-related protein 306-like [Glycine max]
Unigene28600_DHC_Leaf	TAIR	AT1G08810.1	| Symbols: MYB60, AtMYB60 | myb domain protein 60 | chr1:2819279-2820329 REVERSE LENGTH=280
	IRGSP	Os12t0125000-01	Myb factor.
	nr	ref|XP_002271738.1|	PREDICTED: myb-related protein 306 [Vitis vinifera] gi|193795735|gb|ACF21938.1| R2R3 MYB60 transcription factor [Vitis vinifera]
Unigene28730_DHC_Leaf	TAIR	AT4G38620.1	| Symbols: ATMYB4, MYB4 | myb domain protein 4 | chr4:18053866-18054876 FORWARD LENGTH=282
	IRGSP	Os09t0538400-01	Similar to P-type R2R3 Myb protein (Fragment).
	nr	ref|XP_003599668.1|	R2R3-MYB transcription factor [Medicago truncatula] gi|355488716|gb|AES69919.1| R2R3-MYB transcription factor [Medicago truncatula]
Unigene28731_DHC_Leaf	TAIR	AT5G62470.2	| Symbols: MYB96 | myb domain protein 96 | chr5:25079434-25080858 REVERSE LENGTH=352
	IRGSP	Os08t0437300-00	Similar to Typical P-type R2R3 Myb protein (Fragment).
	nr	ref|XP_003599668.1|	R2R3-MYB transcription factor [Medicago truncatula] gi|355488716|gb|AES69919.1| R2R3-MYB transcription factor [Medicago truncatula]
Unigene29188_DHC_Leaf	TAIR	AT5G18240.4	| Symbols: MYR1 | myb-related protein 1 | chr5:6028617-6030573 REVERSE LENGTH=402
	IRGSP	Os03t0325500-01	Similar to Phosphate starvation regulator protein (Regulatory protein of P- starvation acclimation response Psr1).
	nr	ref|XP_002269530.2|	PREDICTED: uncharacterized protein LOC100255052 [Vitis vinifera]
Unigene30691_DHC_Leaf	TAIR	AT4G38620.1	| Symbols: ATMYB4, MYB4 | myb domain protein 4 | chr4:18053866-18054876 FORWARD LENGTH=282
	IRGSP	Os09t0538400-01	Similar to P-type R2R3 Myb protein (Fragment).
	nr	gb|EOX97694.1|	MYB domain class transcription factor [Theobroma cacao]
Unigene31221_DHC_Leaf	TAIR	AT3G13040.2	| Symbols: | myb-like HTH transcriptional regulator family protein | chr3:4172415-4174456 REVERSE LENGTH=449
	IRGSP	Os06t0703900-02	Homeodomain-like containing protein.
	nr	ref|NP_001058503.1|	Os06g0703900 [Oryza sativa Japonica Group] gi|53791923|dbj|BAD54045.1| putative transfactor [Oryza sativa Japonica Group] gi|113596543|dbj|BAF20417.1| Os06g0703900 [Oryza sativa Japonica Group] gi|215695487|dbj|BAG90678.1| unnamed protein product [Oryza sativa Japonica Group] gi|215765827|dbj|BAG87524.1| unnamed protein product [Oryza sativa Japonica Group] gi|222636186|gb|EEE66318.1| hypothetica…
Unigene31551_DHC_Leaf	TAIR	AT3G11450.1	| Symbols: | DnaJ domain ;Myb-like DNA-binding domain | chr3:3605459-3607402 REVERSE LENGTH=647
	IRGSP	--No_Hits--
	nr	dbj|BAH15356.1|	gonidia forming protein GlsA [Alstroemeria aurea]
Unigene31635_DHC_Leaf	TAIR	AT4G28610.1	| Symbols: PHR1, AtPHR1 | phosphate starvation response 1 | chr4:14133164-14134951 REVERSE LENGTH=409
	IRGSP	Os03t0329900-01	MYB-CC family protein, Pi-starvation signaling
	nr	gb|AFK35281.1|	unknown [Medicago truncatula]
Unigene32001_DHC_Leaf	TAIR	AT5G02840.2	| Symbols: LCL1 | LHY/CCA1-like 1 | chr5:648794-651212 FORWARD LENGTH=293
	IRGSP	--No_Hits--
	nr	gb|ACH87169.1|	MYB transcription factor [Camellia sinensis]
Unigene32176_DHC_Leaf	TAIR	AT5G61620.1	| Symbols: | myb-like transcription factor family protein | chr5:24772383-24773507 FORWARD LENGTH=317
	IRGSP	Os01t0192300-01	Similar to I-box binding factor (Fragment).
	nr	ref|XP_002278155.1|	PREDICTED: transcription factor MYB1R1-like [Vitis vinifera]
Unigene32577_DHC_Leaf	TAIR	AT3G24490.1	| Symbols: | Alcohol dehydrogenase transcription factor Myb/SANT-like family protein | chr3:8911022-8912023 FORWARD LENGTH=333
	IRGSP	Os01t0718900-01	MADF domain domain containing protein.
	nr	ref|XP_002281208.1|	PREDICTED: uncharacterized protein LOC100245606 isoform 1 [Vitis vinifera] gi|359484599|ref|XP_003633126.1| PREDICTED: uncharacterized protein LOC100245606 isoform 2 [Vitis vinifera] gi|359484601|ref|XP_003633127.1| PREDICTED: uncharacterized protein LOC100245606 isoform 3 [Vitis vinifera] gi|359484603|ref|XP_003633128.1| PREDICTED: uncharacterized protein LOC100245606 isoform 4 [Vitis vinifera] …
Unigene32843_DHC_Leaf	TAIR	AT2G47460.1	| Symbols: MYB12, ATMYB12, PFG1 | myb domain protein 12 | chr2:19476438-19479242 FORWARD LENGTH=371
	IRGSP	Os01t0305900-01	Similar to R2R3 Myb transcription factor MYB-IF35.
	nr	gb|EEC70496.1|	hypothetical protein OsI_01570 [Oryza sativa Indica Group]
Unigene33591_DHC_Leaf	TAIR	AT5G05090.1	| Symbols: | Homeodomain-like superfamily protein | chr5:1503393-1504193 FORWARD LENGTH=266
	IRGSP	Os01t0844900-01	Homeodomain-like containing protein.
	nr	ref|XP_002871136.1|	myb family transcription factor [Arabidopsis lyrata subsp. lyrata] gi|297316973|gb|EFH47395.1| myb family transcription factor [Arabidopsis lyrata subsp. lyrata]
Unigene34060_DHC_Leaf	TAIR	AT1G09540.1	| Symbols: MYB61, ATMYB61 | myb domain protein 61 | chr1:3086333-3087689 FORWARD LENGTH=366
	IRGSP	Os05t0140100-03	Myb transcription factor domain containing protein.
	nr	gb|EOX95482.1|	Myb domain protein 55 [Theobroma cacao]
Unigene34565_DHC_Leaf	TAIR	AT1G09770.1	| Symbols: ATCDC5, CDC5, ATMYBCDC5 | cell division cycle 5 | chr1:3162002-3165122 FORWARD LENGTH=844
	IRGSP	Os04t0348300-01	Similar to OSIGBa0130K07.8 protein.
	nr	gb|EOY10931.1|	Cell division cycle 5 isoform 3 [Theobroma cacao]
Unigene37172_DHC_Leaf	TAIR	AT5G16880.2	| Symbols: | Target of Myb protein 1 | chr5:5549658-5551274 FORWARD LENGTH=407
	IRGSP	Os02t0697300-01	ENTH/VHS domain containing protein.
	nr	ref|XP_002325818.1|	predicted protein [Populus trichocarpa] gi|222862693|gb|EEF00200.1| predicted protein [Populus trichocarpa]
Unigene38009_DHC_Leaf	TAIR	--No_Hits--
	IRGSP	Os02t0776700-03	Hypothetical conserved gene.
	nr	gb|AFW73719.1|	putative MYB DNA-binding domain superfamily protein [Zea mays]
Unigene38061_DHC_Leaf	TAIR	AT3G27810.1	| Symbols: ATMYB21, ATMYB3, MYB21 | myb domain protein 21 | chr3:10307596-10310093 FORWARD LENGTH=226
	IRGSP	Os03t0315400-01	Similar to Typical P-type R2R3 Myb protein (Fragment).
	nr	ref|XP_002465358.1|	hypothetical protein SORBIDRAFT_01g037110 [Sorghum bicolor] gi|241919212|gb|EER92356.1| hypothetical protein SORBIDRAFT_01g037110 [Sorghum bicolor]
Unigene3825_DHC_Leaf	TAIR	AT2G36960.2	| Symbols: TKI1 | TSL-kinase interacting protein 1 | chr2:15523552-15527245 FORWARD LENGTH=741
	IRGSP	Os03t0241100-03	Myb, DNA-binding domain containing protein.
	nr	ref|XP_002276884.2|	PREDICTED: TSL-kinase interacting protein 1-like [Vitis vinifera]
Unigene38369_DHC_Leaf	TAIR	AT1G09540.1	| Symbols: MYB61, ATMYB61 | myb domain protein 61 | chr1:3086333-3087689 FORWARD LENGTH=366
	IRGSP	Os05t0140100-03	Myb transcription factor domain containing protein.
	nr	emb|CAN75641.1|	hypothetical protein VITISV_029178 [Vitis vinifera]
Unigene3980_DHC_Leaf	TAIR	AT3G09230.1	| Symbols: AtMYB1, MYB1 | myb domain protein 1 | chr3:2833460-2835134 FORWARD LENGTH=393
	IRGSP	Os01t0850400-01	Similar to MYBY1 protein (Fragment).
	nr	gb|EMJ20004.1|	hypothetical protein PRUPE_ppa009914mg [Prunus persica]
Unigene4825_DHC_Leaf	TAIR	AT1G49950.1	| Symbols: TRB1, ATTRB1 | telomere repeat binding factor 1 | chr1:18494439-18496713 REVERSE LENGTH=300
	IRGSP	Os01t0589300-01	Similar to Single myb histone 1.
	nr	ref|XP_003533091.1|	PREDICTED: uncharacterized protein LOC778173 isoform 1 [Glycine max] gi|356529014|ref|XP_003533092.1| PREDICTED: uncharacterized protein LOC778173 isoform 2 [Glycine max]
Unigene4859_DHC_Leaf	TAIR	AT2G37630.1	| Symbols: ATPHAN, AS1, ATMYB91, MYB91 | myb-like HTH transcriptional regulator family protein | chr2:15781798-15782901 REVERSE LENGTH=367
	IRGSP	Os12t0572000-00	Similar to Protein rough sheath 2 homolog.
	nr	gb|EOA27356.1|	hypothetical protein CARUB_v10023471mg [Capsella rubella] gi|482563167|gb|EOA27357.1| hypothetical protein CARUB_v10023471mg [Capsella rubella]
Unigene5245_DHC_Leaf	TAIR	AT1G21700.1	| Symbols: ATSWI3C, CHB4, SWI3C | SWITCH/sucrose nonfermenting 3C | chr1:7620156-7623978 REVERSE LENGTH=807
	IRGSP	Os11t0183700-01	Myb, DNA-binding domain containing protein.
	nr	ref|XP_004142633.1|	PREDICTED: SWI/SNF complex subunit SWI3C-like [Cucumis sativus]
Unigene5246_DHC_Leaf	TAIR	AT1G21700.1	| Symbols: ATSWI3C, CHB4, SWI3C | SWITCH/sucrose nonfermenting 3C | chr1:7620156-7623978 REVERSE LENGTH=807
	IRGSP	Os11t0183700-01	Myb, DNA-binding domain containing protein.
	nr	gb|AFW65453.1|	hypothetical protein ZEAMMB73_247521 [Zea mays]
Unigene5281_DHC_Leaf	TAIR	AT2G36960.3	| Symbols: TKI1 | TSL-kinase interacting protein 1 | chr2:15523552-15527245 FORWARD LENGTH=744
	IRGSP	Os03t0241100-03	Myb, DNA-binding domain containing protein.
	nr	ref|XP_003547937.1|	PREDICTED: TSL-kinase interacting protein 1-like [Glycine max]
Unigene5754_DHC_Leaf	TAIR	AT2G03500.1	| Symbols: | Homeodomain-like superfamily protein | chr2:1059926-1062259 FORWARD LENGTH=432
	IRGSP	Os01t0176700-01	Myb-like DNA-binding domain, SHAQKYF class domain containing protein.
	nr	ref|XP_002308314.1|	predicted protein [Populus trichocarpa] gi|222854290|gb|EEE91837.1| predicted protein [Populus trichocarpa]
Unigene5831_DHC_Leaf	TAIR	AT5G62470.2	| Symbols: MYB96 | myb domain protein 96 | chr5:25079434-25080858 REVERSE LENGTH=352
	IRGSP	Os08t0437300-00	Similar to Typical P-type R2R3 Myb protein (Fragment).
	nr	ref|XP_002284926.1|	PREDICTED: myb-related protein 306 [Vitis vinifera]
Unigene5875_DHC_Leaf	TAIR	AT1G56160.1	| Symbols: ATMYB72, MYB72 | myb domain protein 72 | chr1:21022384-21023444 FORWARD LENGTH=296
	IRGSP	Os04t0594100-01	Similar to P-type R2R3 Myb protein (Fragment).
	nr	gb|EAZ31836.1|	hypothetical protein OsJ_15997 [Oryza sativa Japonica Group]
Unigene6001_DHC_Leaf	TAIR	AT1G17950.1	| Symbols: ATMYB52, BW52, MYB52 | myb domain protein 52 | chr1:6177764-6179063 FORWARD LENGTH=249
	IRGSP	Os11t0207600-00	Myb-like protein.
	nr	gb|EOY16562.1|	Myb domain protein 52 [Theobroma cacao]
Unigene6466_DHC_Leaf	TAIR	AT3G18100.3	| Symbols: MYB4R1 | myb domain protein 4r1 | chr3:6200689-6204583 FORWARD LENGTH=799
	IRGSP	--No_Hits--
	nr	ref|XP_002278062.2|	PREDICTED: uncharacterized protein LOC100268025 [Vitis vinifera]
Unigene6669_DHC_Leaf	TAIR	AT4G09460.1	| Symbols: AtMYB6, MYB6 | myb domain protein 6 | chr4:5993019-5994038 FORWARD LENGTH=236
	IRGSP	Os11t0180900-00	Myb transcription factor domain containing protein.
	nr	dbj|BAM05596.1|	MYB transcription factor 1 [Eucalyptus pilularis] gi|383081889|dbj|BAM05597.1| MYB transcription factor 1 [Eucalyptus pilularis] gi|383081891|dbj|BAM05598.1| MYB transcription factor 1 [Eucalyptus pyrocarpa]
Unigene6938_DHC_Leaf	TAIR	AT4G34430.2	| Symbols: CHB3, ATSWI3D | DNA-binding family protein | chr4:16461069-16464993 FORWARD LENGTH=985
	IRGSP	Os04t0110300-02	Myb, DNA-binding domain containing protein.
	nr	emb|CBI32576.3|	unnamed protein product [Vitis vinifera]
Unigene7927_DHC_Leaf	TAIR	AT2G01060.1	| Symbols: | myb-like HTH transcriptional regulator family protein | chr2:73456-74902 REVERSE LENGTH=286
	IRGSP	Os09t0299200-01	Similar to MYB-CC type transfactor.
	nr	--No_Hits--
Unigene8047_DHC_Leaf	TAIR	AT2G23290.1	| Symbols: AtMYB70, MYB70 | myb domain protein 70 | chr2:9904895-9905824 REVERSE LENGTH=309
	IRGSP	Os09t0106700-01	Similar to Myb proto-oncogene protein (C-myb).
	nr	emb|CBI19466.3|	unnamed protein product [Vitis vinifera]
Unigene8377_DHC_Leaf	TAIR	AT2G01060.1	| Symbols: | myb-like HTH transcriptional regulator family protein | chr2:73456-74902 REVERSE LENGTH=286
	IRGSP	Os09t0299200-01	Similar to MYB-CC type transfactor.
	nr	ref|NP_001062813.1|	Os09g0299200 [Oryza sativa Japonica Group] gi|50725048|dbj|BAD33181.1| putative transfactor [Oryza sativa Japonica Group] gi|50725525|dbj|BAD32994.1| putative transfactor [Oryza sativa Japonica Group] gi|113631046|dbj|BAF24727.1| Os09g0299200 [Oryza sativa Japonica Group] gi|215737042|dbj|BAG95971.1| unnamed protein product [Oryza sativa Japonica Group]
Unigene9927_DHC_Leaf	TAIR	AT1G08810.1	| Symbols: MYB60, AtMYB60 | myb domain protein 60 | chr1:2819279-2820329 REVERSE LENGTH=280
	IRGSP	Os12t0125000-01	Myb factor.
	nr	ref|XP_002514763.1|	r2r3-myb transcription factor, putative [Ricinus communis] gi|223546367|gb|EEF47869.1| r2r3-myb transcription factor, putative [Ricinus communis]
Unigene9928_DHC_Leaf	TAIR	AT1G08810.1	| Symbols: MYB60, AtMYB60 | myb domain protein 60 | chr1:2819279-2820329 REVERSE LENGTH=280
	IRGSP	Os08t0437300-00	Similar to Typical P-type R2R3 Myb protein (Fragment).
	nr	gb|EOY10429.1|	Myb domain protein 60 [Theobroma cacao]
CL1071.Contig1_DHA_Leaf	TAIR	AT2G33610.1	| Symbols: ATSWI3B, CHB2, SWI3B | switch subunit 3 | chr2:14229023-14231149 FORWARD LENGTH=469
	IRGSP	Os04t0480300-01	Myb, DNA-binding domain containing protein.
	nr	gb|EAZ22070.1|	hypothetical protein OsJ_05733 [Oryza sativa Japonica Group]
CL1071.Contig2_DHA_Leaf	TAIR	AT2G33610.1	| Symbols: ATSWI3B, CHB2, SWI3B | switch subunit 3 | chr2:14229023-14231149 FORWARD LENGTH=469
	IRGSP	Os04t0480300-01	Myb, DNA-binding domain containing protein.
	nr	gb|EAZ22070.1|	hypothetical protein OsJ_05733 [Oryza sativa Japonica Group]
CL1119.Contig1_DHA_Leaf	TAIR	AT1G66230.1	| Symbols: MYB20, AtMYB20 | myb domain protein 20 | chr1:24677322-24678246 FORWARD LENGTH=282
	IRGSP	Os09t0532900-04	Myb transcription factor domain containing protein.
	nr	--No_Hits--
CL1119.Contig2_DHA_Leaf	TAIR	AT1G66230.1	| Symbols: MYB20, AtMYB20 | myb domain protein 20 | chr1:24677322-24678246 FORWARD LENGTH=282
	IRGSP	Os09t0532900-04	Myb transcription factor domain containing protein.
	nr	--No_Hits--
CL1265.Contig1_DHA_Leaf	TAIR	AT3G24490.1	| Symbols: | Alcohol dehydrogenase transcription factor Myb/SANT-like family protein | chr3:8911022-8912023 FORWARD LENGTH=333
	IRGSP	Os01t0718900-01	MADF domain domain containing protein.
	nr	ref|XP_004141778.1|	PREDICTED: uncharacterized protein LOC101223116 [Cucumis sativus] gi|449522534|ref|XP_004168281.1| PREDICTED: uncharacterized protein LOC101226171 [Cucumis sativus]
CL1388.Contig1_DHA_Leaf	TAIR	AT3G09600.2	| Symbols: | Homeodomain-like superfamily protein | chr3:2946459-2948200 FORWARD LENGTH=282
	IRGSP	Os06t0105800-02	Homeodomain-like containing protein.
	nr	gb|ABV02070.1|	transcription factor 1R-MYB1 [Chimonanthus praecox]
CL1388.Contig2_DHA_Leaf	TAIR	AT3G09600.2	| Symbols: | Homeodomain-like superfamily protein | chr3:2946459-2948200 FORWARD LENGTH=282
	IRGSP	Os06t0669700-01	Similar to DNA binding protein.
	nr	gb|AFW76063.1|	putative MYB DNA-binding domain superfamily protein [Zea mays]
CL1464.Contig1_DHA_Leaf	TAIR	AT5G29000.3	| Symbols: PHL1 | Homeodomain-like superfamily protein | chr5:11022336-11024100 REVERSE LENGTH=370
	IRGSP	Os07t0438800-01	MYB-CC family protein, Pi-starvation signaling
	nr	ref|XP_004240480.1|	PREDICTED: protein PHR1-LIKE 1-like [Solanum lycopersicum]
CL1464.Contig2_DHA_Leaf	TAIR	AT4G28610.1	| Symbols: PHR1, AtPHR1 | phosphate starvation response 1 | chr4:14133164-14134951 REVERSE LENGTH=409
	IRGSP	Os03t0329900-01	MYB-CC family protein, Pi-starvation signaling
	nr	gb|AFK35281.1|	unknown [Medicago truncatula]
CL1924.Contig1_DHA_Leaf	TAIR	AT3G28910.1	| Symbols: ATMYB30, MYB30 | myb domain protein 30 | chr3:10911443-10912856 FORWARD LENGTH=323
	IRGSP	Os08t0437300-00	Similar to Typical P-type R2R3 Myb protein (Fragment).
	nr	ref|XP_002284926.1|	PREDICTED: myb-related protein 306 [Vitis vinifera]
CL1924.Contig2_DHA_Leaf	TAIR	AT3G47600.1	| Symbols: MYB94, ATMYBCP70, ATMYB94 | myb domain protein 94 | chr3:17539627-17541035 REVERSE LENGTH=333
	IRGSP	Os07t0629000-01	Similar to P-type R2R3 Myb protein (Fragment).
	nr	gb|EMT05173.1|	Myb-related protein 306 [Aegilops tauschii]
CL1924.Contig3_DHA_Leaf	TAIR	AT4G38620.1	| Symbols: ATMYB4, MYB4 | myb domain protein 4 | chr4:18053866-18054876 FORWARD LENGTH=282
	IRGSP	Os09t0538400-01	Similar to P-type R2R3 Myb protein (Fragment).
	nr	ref|XP_003599668.1|	R2R3-MYB transcription factor [Medicago truncatula] gi|355488716|gb|AES69919.1| R2R3-MYB transcription factor [Medicago truncatula]
CL1924.Contig4_DHA_Leaf	TAIR	AT5G62470.2	| Symbols: MYB96 | myb domain protein 96 | chr5:25079434-25080858 REVERSE LENGTH=352
	IRGSP	Os08t0437300-00	Similar to Typical P-type R2R3 Myb protein (Fragment).
	nr	ref|XP_002284926.1|	PREDICTED: myb-related protein 306 [Vitis vinifera]
CL2087.Contig1_DHA_Leaf	TAIR	AT3G61600.2	| Symbols: ATPOB1, POB1 | POZ/BTB containin G-protein 1 | chr3:22795704-22798069 FORWARD LENGTH=561
	IRGSP	Os06t0507400-01	Similar to GAMYB-binding protein (Fragment).
	nr	ref|NP_850733.1|	POZ/BTB containin G-protein 1 [Arabidopsis thaliana] gi|327488374|sp|Q9FPW6.2|POB1_ARATH RecName: Full=BTB/POZ domain-containing protein POB1; AltName: Full=POZ/BTB CONTAINING-PROTEIN 1; Short=AtPOB1 gi|332646708|gb|AEE80229.1| POZ/BTB containin G-protein 1 [Arabidopsis thaliana]
CL2720.Contig3_DHA_Leaf	TAIR	AT5G52660.2	| Symbols: | Homeodomain-like superfamily protein | chr5:21359423-21362037 REVERSE LENGTH=331
	IRGSP	Os02t0680700-01	Similar to DNA binding protein.
	nr	ref|XP_003622487.1|	MYB transcription factor MYB146 [Medicago truncatula] gi|355497502|gb|AES78705.1| MYB transcription factor MYB146 [Medicago truncatula]
CL2843.Contig1_DHA_Leaf	TAIR	--No_Hits--
	IRGSP	Os12t0207200-01	Myb/SANT-like domain domain containing protein.
	nr	ref|XP_003518028.1|	PREDICTED: uncharacterized protein At2g29880-like [Glycine max]
CL3113.Contig1_DHA_Leaf	TAIR	AT4G13020.3	| Symbols: MHK | Protein kinase superfamily protein | chr4:7604015-7606812 FORWARD LENGTH=444
	IRGSP	Os03t0847600-02	Similar to GAMYB-binding protein.
	nr	ref|NP_001140217.1|	uncharacterized LOC100272250 [Zea mays] gi|194696202|gb|ACF82185.1| unknown [Zea mays] gi|194697258|gb|ACF82713.1| unknown [Zea mays] gi|194698536|gb|ACF83352.1| unknown [Zea mays] gi|195640860|gb|ACG39898.1| serine/threonine-protein kinase MHK [Zea mays] gi|414873921|tpg|DAA52478.1| TPA: putative protein kinase superfamily protein isoform 1 [Zea mays] gi|414873922|tpg|DAA52479.1| TPA: putative p…
CL3113.Contig2_DHA_Leaf	TAIR	AT4G13020.3	| Symbols: MHK | Protein kinase superfamily protein | chr4:7604015-7606812 FORWARD LENGTH=444
	IRGSP	Os03t0847600-02	Similar to GAMYB-binding protein.
	nr	ref|NP_001140217.1|	uncharacterized LOC100272250 [Zea mays] gi|194696202|gb|ACF82185.1| unknown [Zea mays] gi|194697258|gb|ACF82713.1| unknown [Zea mays] gi|194698536|gb|ACF83352.1| unknown [Zea mays] gi|195640860|gb|ACG39898.1| serine/threonine-protein kinase MHK [Zea mays] gi|414873921|tpg|DAA52478.1| TPA: putative protein kinase superfamily protein isoform 1 [Zea mays] gi|414873922|tpg|DAA52479.1| TPA: putative p…
CL3115.Contig1_DHA_Leaf	TAIR	AT1G09770.1	| Symbols: ATCDC5, CDC5, ATMYBCDC5 | cell division cycle 5 | chr1:3162002-3165122 FORWARD LENGTH=844
	IRGSP	Os04t0348300-01	Similar to OSIGBa0130K07.8 protein.
	nr	ref|XP_002265478.1|	PREDICTED: cell division cycle 5-like protein [Vitis vinifera]
CL3115.Contig2_DHA_Leaf	TAIR	AT1G09770.1	| Symbols: ATCDC5, CDC5, ATMYBCDC5 | cell division cycle 5 | chr1:3162002-3165122 FORWARD LENGTH=844
	IRGSP	Os04t0348300-01	Similar to OSIGBa0130K07.8 protein.
	nr	ref|XP_002265478.1|	PREDICTED: cell division cycle 5-like protein [Vitis vinifera]
CL3540.Contig1_DHA_Leaf	TAIR	AT4G38620.1	| Symbols: ATMYB4, MYB4 | myb domain protein 4 | chr4:18053866-18054876 FORWARD LENGTH=282
	IRGSP	Os09t0538400-01	Similar to P-type R2R3 Myb protein (Fragment).
	nr	gb|EOX97694.1|	MYB domain class transcription factor [Theobroma cacao]
CL3540.Contig2_DHA_Leaf	TAIR	AT4G38620.1	| Symbols: ATMYB4, MYB4 | myb domain protein 4 | chr4:18053866-18054876 FORWARD LENGTH=282
	IRGSP	Os09t0538400-01	Similar to P-type R2R3 Myb protein (Fragment).
	nr	gb|EOX97694.1|	MYB domain class transcription factor [Theobroma cacao]
CL3540.Contig3_DHA_Leaf	TAIR	AT4G38620.1	| Symbols: ATMYB4, MYB4 | myb domain protein 4 | chr4:18053866-18054876 FORWARD LENGTH=282
	IRGSP	Os09t0538400-01	Similar to P-type R2R3 Myb protein (Fragment).
	nr	ref|XP_004147038.1|	PREDICTED: myb-related protein 308-like [Cucumis sativus] gi|449531870|ref|XP_004172908.1| PREDICTED: LOW QUALITY PROTEIN: myb-related protein 308-like [Cucumis sativus]
CL3540.Contig4_DHA_Leaf	TAIR	AT4G38620.1	| Symbols: ATMYB4, MYB4 | myb domain protein 4 | chr4:18053866-18054876 FORWARD LENGTH=282
	IRGSP	Os09t0538400-01	Similar to P-type R2R3 Myb protein (Fragment).
	nr	gb|EOX97694.1|	MYB domain class transcription factor [Theobroma cacao]
CL4069.Contig1_DHA_Leaf	TAIR	AT2G47210.1	| Symbols: | myb-like transcription factor family protein | chr2:19379039-19382204 FORWARD LENGTH=441
	IRGSP	Os05t0540800-01	Homeodomain-like containing protein.
	nr	ref|XP_002278881.1|	PREDICTED: SWR1-complex protein 4 [Vitis vinifera] gi|297744019|emb|CBI36989.3| unnamed protein product [Vitis vinifera]
CL4069.Contig2_DHA_Leaf	TAIR	AT2G47210.1	| Symbols: | myb-like transcription factor family protein | chr2:19379039-19382204 FORWARD LENGTH=441
	IRGSP	Os05t0540800-01	Homeodomain-like containing protein.
	nr	ref|XP_002278881.1|	PREDICTED: SWR1-complex protein 4 [Vitis vinifera] gi|297744019|emb|CBI36989.3| unnamed protein product [Vitis vinifera]
CL4667.Contig1_DHA_Leaf	TAIR	AT1G06180.1	| Symbols: ATMYB13, ATMYBLFGN, MYB13 | myb domain protein 13 | chr1:1889510-1891089 FORWARD LENGTH=246
	IRGSP	Os02t0624300-01	Similar to Y19 protein.
	nr	gb|AFK39973.1|	unknown [Medicago truncatula]
CL4667.Contig2_DHA_Leaf	TAIR	AT1G06180.1	| Symbols: ATMYB13, ATMYBLFGN, MYB13 | myb domain protein 13 | chr1:1889510-1891089 FORWARD LENGTH=246
	IRGSP	Os02t0624300-01	Similar to Y19 protein.
	nr	gb|AFK39973.1|	unknown [Medicago truncatula]
CL522.Contig1_DHA_Leaf	TAIR	AT3G61600.2	| Symbols: ATPOB1, POB1 | POZ/BTB containin G-protein 1 | chr3:22795704-22798069 FORWARD LENGTH=561
	IRGSP	Os06t0507400-01	Similar to GAMYB-binding protein (Fragment).
	nr	ref|XP_003554745.1|	PREDICTED: BTB/POZ domain-containing protein POB1-like [Glycine max]
CL522.Contig2_DHA_Leaf	TAIR	AT3G61600.2	| Symbols: ATPOB1, POB1 | POZ/BTB containin G-protein 1 | chr3:22795704-22798069 FORWARD LENGTH=561
	IRGSP	Os06t0507400-01	Similar to GAMYB-binding protein (Fragment).
	nr	ref|XP_002279915.1|	PREDICTED: BTB/POZ domain-containing protein POB1-like [Vitis vinifera]
CL522.Contig3_DHA_Leaf	TAIR	AT3G61600.2	| Symbols: ATPOB1, POB1 | POZ/BTB containin G-protein 1 | chr3:22795704-22798069 FORWARD LENGTH=561
	IRGSP	Os06t0507400-01	Similar to GAMYB-binding protein (Fragment).
	nr	gb|EMT31791.1|	hypothetical protein F775_32011 [Aegilops tauschii]
CL522.Contig4_DHA_Leaf	TAIR	AT3G61600.2	| Symbols: ATPOB1, POB1 | POZ/BTB containin G-protein 1 | chr3:22795704-22798069 FORWARD LENGTH=561
	IRGSP	Os02t0260700-01	Similar to GAMYB-binding protein (Fragment).
	nr	ref|XP_002276076.2|	PREDICTED: BTB/POZ domain-containing protein POB1-like [Vitis vinifera]
CL522.Contig5_DHA_Leaf	TAIR	AT3G61600.2	| Symbols: ATPOB1, POB1 | POZ/BTB containin G-protein 1 | chr3:22795704-22798069 FORWARD LENGTH=561
	IRGSP	Os02t0260700-01	Similar to GAMYB-binding protein (Fragment).
	nr	ref|XP_002276076.2|	PREDICTED: BTB/POZ domain-containing protein POB1-like [Vitis vinifera]
CL522.Contig6_DHA_Leaf	TAIR	AT3G61600.2	| Symbols: ATPOB1, POB1 | POZ/BTB containin G-protein 1 | chr3:22795704-22798069 FORWARD LENGTH=561
	IRGSP	Os06t0507400-01	Similar to GAMYB-binding protein (Fragment).
	nr	emb|CAN63457.1|	hypothetical protein VITISV_008241 [Vitis vinifera]
CL5592.Contig1_DHA_Leaf	TAIR	AT3G11440.1	| Symbols: ATMYB65, MYB65 | myb domain protein 65 | chr3:3603056-3604929 FORWARD LENGTH=553
	IRGSP	Os01t0812000-03	Similar to cDNA clone:J033109N02, full insert sequence.
	nr	ref|XP_002268969.1|	PREDICTED: uncharacterized protein LOC100253438 [Vitis vinifera]
CL5608.Contig1_DHA_Leaf	TAIR	AT5G17300.1	| Symbols: RVE1 | Homeodomain-like superfamily protein | chr5:5690435-5692435 REVERSE LENGTH=387
	IRGSP	Os06t0728700-01	Homeodomain-like containing protein.
	nr	ref|NP_001146835.1|	LOC100280442 [Zea mays] gi|198444862|gb|ACH88347.1| MYB-like protein E1 [Zea mays]
CL598.Contig1_DHA_Leaf	TAIR	AT1G49950.1	| Symbols: TRB1, ATTRB1 | telomere repeat binding factor 1 | chr1:18494439-18496713 REVERSE LENGTH=300
	IRGSP	Os12t0613300-02	Similar to Single myb histone 6.
	nr	ref|XP_002525279.1|	Histone H1.1, putative [Ricinus communis] gi|223535437|gb|EEF37107.1| Histone H1.1, putative [Ricinus communis]
CL598.Contig2_DHA_Leaf	TAIR	AT1G49950.1	| Symbols: TRB1, ATTRB1 | telomere repeat binding factor 1 | chr1:18494439-18496713 REVERSE LENGTH=300
	IRGSP	Os12t0613300-02	Similar to Single myb histone 6.
	nr	ref|XP_004250736.1|	PREDICTED: telomere repeat-binding factor 1-like isoform 4 [Solanum lycopersicum]
CL6189.Contig1_DHA_Leaf	TAIR	AT5G47390.1	| Symbols: | myb-like transcription factor family protein | chr5:19227001-19228546 FORWARD LENGTH=365
	IRGSP	Os10t0561400-02	Similar to Transcription factor MYBS3.
	nr	emb|CBY88798.1|	myb transcription factor [Humulus lupulus]
CL6189.Contig2_DHA_Leaf	TAIR	AT5G47390.1	| Symbols: | myb-like transcription factor family protein | chr5:19227001-19228546 FORWARD LENGTH=365
	IRGSP	Os10t0561400-03	Similar to Myb transcription factor.
	nr	emb|CBI29498.3|	unnamed protein product [Vitis vinifera]
CL6390.Contig1_DHA_Leaf	TAIR	AT2G01060.1	| Symbols: | myb-like HTH transcriptional regulator family protein | chr2:73456-74902 REVERSE LENGTH=286
	IRGSP	Os06t0609500-01	Homeodomain-like containing protein.
	nr	ref|XP_002272588.2|	PREDICTED: uncharacterized protein LOC100248144 [Vitis vinifera]
CL6390.Contig2_DHA_Leaf	TAIR	AT2G01060.1	| Symbols: | myb-like HTH transcriptional regulator family protein | chr2:73456-74902 REVERSE LENGTH=286
	IRGSP	Os06t0609500-01	Homeodomain-like containing protein.
	nr	ref|XP_002272588.2|	PREDICTED: uncharacterized protein LOC100248144 [Vitis vinifera]
CL6489.Contig1_DHA_Leaf	TAIR	AT5G04760.1	| Symbols: | Duplicated homeodomain-like superfamily protein | chr5:1373752-1374529 REVERSE LENGTH=215
	IRGSP	Os05t0442400-01	Similar to MybSt1.
	nr	gb|AEV91177.1|	MYB-related protein [Triticum aestivum]
CL6489.Contig2_DHA_Leaf	TAIR	AT5G04760.1	| Symbols: | Duplicated homeodomain-like superfamily protein | chr5:1373752-1374529 REVERSE LENGTH=215
	IRGSP	Os05t0442400-01	Similar to MybSt1.
	nr	gb|AEV91177.1|	MYB-related protein [Triticum aestivum]
CL6694.Contig1_DHA_Leaf	TAIR	AT1G32240.1	| Symbols: KAN2 | Homeodomain-like superfamily protein | chr1:11625882-11630355 REVERSE LENGTH=388
	IRGSP	Os09t0395300-00	Similar to myb-like DNA-binding domain, SHAQKYF class family protein.
	nr	gb|EOY25193.1|	Homeodomain-like superfamily protein isoform 1 [Theobroma cacao] gi|508777938|gb|EOY25194.1| Homeodomain-like superfamily protein isoform 1 [Theobroma cacao]
CL670.Contig1_DHA_Leaf	TAIR	AT1G09540.1	| Symbols: MYB61, ATMYB61 | myb domain protein 61 | chr1:3086333-3087689 FORWARD LENGTH=366
	IRGSP	Os01t0285300-01	Myb transcription factor domain containing protein.
	nr	gb|EOX95482.1|	Myb domain protein 55 [Theobroma cacao]
CL670.Contig2_DHA_Leaf	TAIR	AT4G01680.3	| Symbols: MYB55 | myb domain protein 55 | chr4:716401-717415 REVERSE LENGTH=241
	IRGSP	Os05t0140100-03	Myb transcription factor domain containing protein.
	nr	ref|XP_002320929.1|	predicted protein [Populus trichocarpa] gi|222861702|gb|EEE99244.1| predicted protein [Populus trichocarpa]
CL670.Contig3_DHA_Leaf	TAIR	AT1G09540.1	| Symbols: MYB61, ATMYB61 | myb domain protein 61 | chr1:3086333-3087689 FORWARD LENGTH=366
	IRGSP	Os05t0140100-03	Myb transcription factor domain containing protein.
	nr	gb|EOX95482.1|	Myb domain protein 55 [Theobroma cacao]
CL670.Contig4_DHA_Leaf	TAIR	AT1G09540.1	| Symbols: MYB61, ATMYB61 | myb domain protein 61 | chr1:3086333-3087689 FORWARD LENGTH=366
	IRGSP	Os05t0140100-03	Myb transcription factor domain containing protein.
	nr	ref|XP_002330046.1|	predicted protein [Populus trichocarpa] gi|222871471|gb|EEF08602.1| predicted protein [Populus trichocarpa]
CL7021.Contig1_DHA_Leaf	TAIR	AT2G31180.1	| Symbols: ATMYB14, MYB14AT, MYB14 | myb domain protein 14 | chr2:13286806-13288175 REVERSE LENGTH=249
	IRGSP	Os02t0624300-01	Similar to Y19 protein.
	nr	ref|XP_002281274.1|	PREDICTED: myb-related protein Myb4 [Vitis vinifera]
CL7021.Contig2_DHA_Leaf	TAIR	AT3G23250.1	| Symbols: MYB15, ATY19, ATMYB15 | myb domain protein 15 | chr3:8309492-8310624 FORWARD LENGTH=285
	IRGSP	Os02t0624300-01	Similar to Y19 protein.
	nr	gb|EMJ23031.1|	hypothetical protein PRUPE_ppa020190mg [Prunus persica]
CL7021.Contig3_DHA_Leaf	TAIR	AT2G31180.1	| Symbols: ATMYB14, MYB14AT, MYB14 | myb domain protein 14 | chr2:13286806-13288175 REVERSE LENGTH=249
	IRGSP	Os02t0624300-01	Similar to Y19 protein.
	nr	ref|XP_002281274.1|	PREDICTED: myb-related protein Myb4 [Vitis vinifera]
CL7021.Contig4_DHA_Leaf	TAIR	AT3G23250.1	| Symbols: MYB15, ATY19, ATMYB15 | myb domain protein 15 | chr3:8309492-8310624 FORWARD LENGTH=285
	IRGSP	Os02t0624300-01	Similar to Y19 protein.
	nr	gb|EMJ23031.1|	hypothetical protein PRUPE_ppa020190mg [Prunus persica]
Unigene10143_DHA_Leaf	TAIR	AT5G49620.1	| Symbols: AtMYB78, MYB78 | myb domain protein 78 | chr5:20137491-20139384 REVERSE LENGTH=307
	IRGSP	Os03t0315400-01	Similar to Typical P-type R2R3 Myb protein (Fragment).
	nr	emb|CCA29096.1|	putative MYB transcription factor [Rosa rugosa]
Unigene10504_DHA_Leaf	TAIR	AT5G49620.2	| Symbols: MYB78 | myb domain protein 78 | chr5:20137491-20139384 REVERSE LENGTH=321
	IRGSP	Os03t0315400-01	Similar to Typical P-type R2R3 Myb protein (Fragment).
	nr	ref|XP_003533124.1|	PREDICTED: uncharacterized protein LOC100805341 [Glycine max]
Unigene11472_DHA_Leaf	TAIR	AT5G61620.1	| Symbols: | myb-like transcription factor family protein | chr5:24772383-24773507 FORWARD LENGTH=317
	IRGSP	Os01t0192300-01	Similar to I-box binding factor (Fragment).
	nr	ref|XP_002278155.1|	PREDICTED: transcription factor MYB1R1-like [Vitis vinifera]
Unigene1165_DHA_Leaf	TAIR	AT3G18100.3	| Symbols: MYB4R1 | myb domain protein 4r1 | chr3:6200689-6204583 FORWARD LENGTH=799
	IRGSP	--No_Hits--
	nr	ref|XP_003637780.1|	Myb-like DNA-binding protein BAS1 [Medicago truncatula] gi|355503715|gb|AES84918.1| Myb-like DNA-binding protein BAS1 [Medicago truncatula]
Unigene11862_DHA_Leaf	TAIR	AT1G70000.2	| Symbols: | myb-like transcription factor family protein | chr1:26363674-26364635 REVERSE LENGTH=261
	IRGSP	Os08t0151000-00	Similar to Myb-like DNA-binding domain, SHAQKYF class family protein.
	nr	ref|XP_003517881.1|	PREDICTED: transcription factor MYB1R1 [Glycine max]
Unigene12380_DHA_Leaf	TAIR	AT4G34430.3	| Symbols: CHB3, ATSWI3D | DNA-binding family protein | chr4:16461069-16464993 FORWARD LENGTH=983
	IRGSP	Os04t0110300-02	Myb, DNA-binding domain containing protein.
	nr	gb|EMJ00896.1|	hypothetical protein PRUPE_ppa000770mg [Prunus persica]
Unigene12660_DHA_Leaf	TAIR	AT5G47390.1	| Symbols: | myb-like transcription factor family protein | chr5:19227001-19228546 FORWARD LENGTH=365
	IRGSP	Os10t0561400-02	Similar to Transcription factor MYBS3.
	nr	ref|XP_004508939.1|	PREDICTED: transcription factor MYB1R1-like [Cicer arietinum]
Unigene12898_DHA_Leaf	TAIR	AT1G77180.3	| Symbols: SKIP | chromatin protein family | chr1:28999791-29001632 REVERSE LENGTH=511
	IRGSP	Os02t0759800-01	Similar to GAMYB-binding protein (Fragment).
	nr	ref|XP_002332355.1|	predicted protein [Populus trichocarpa] gi|222832076|gb|EEE70553.1| predicted protein [Populus trichocarpa]
Unigene12899_DHA_Leaf	TAIR	AT1G77180.2	| Symbols: SKIP | chromatin protein family | chr1:28999791-29001632 REVERSE LENGTH=613
	IRGSP	Os02t0759800-02	Similar to pre-mRNA-splicing factor prp45.
	nr	ref|NP_001048184.1|	Os02g0759800 [Oryza sativa Japonica Group] gi|47497360|dbj|BAD19399.1| putative GAMYB-binding protein [Oryza sativa Japonica Group] gi|113537715|dbj|BAF10098.1| Os02g0759800 [Oryza sativa Japonica Group] gi|125541209|gb|EAY87604.1| hypothetical protein OsI_09015 [Oryza sativa Indica Group] gi|125583761|gb|EAZ24692.1| hypothetical protein OsJ_08462 [Oryza sativa Japonica Group]
Unigene13297_DHA_Leaf	TAIR	AT4G19110.1	| Symbols: | Protein kinase superfamily protein | chr4:10454770-10457468 REVERSE LENGTH=461
	IRGSP	Os02t0700600-01	Similar to GAMYB-binding protein.
	nr	gb|EOY25312.1|	Kinase superfamily protein isoform 1 [Theobroma cacao] gi|508778057|gb|EOY25313.1| Kinase superfamily protein isoform 1 [Theobroma cacao]
Unigene13353_DHA_Leaf	TAIR	AT1G49950.1	| Symbols: TRB1, ATTRB1 | telomere repeat binding factor 1 | chr1:18494439-18496713 REVERSE LENGTH=300
	IRGSP	Os01t0708000-00	Similar to Single myb histone 4.
	nr	gb|EMS64071.1|	Glycylpeptide N-tetradecanoyltransferase 1 [Triticum urartu]
Unigene13354_DHA_Leaf	TAIR	AT1G17520.1	| Symbols: | Homeodomain-like/winged-helix DNA-binding family protein | chr1:6024959-6027224 REVERSE LENGTH=296
	IRGSP	Os01t0708000-00	Similar to Single myb histone 4.
	nr	ref|XP_002281183.1|	PREDICTED: uncharacterized protein LOC100254369 [Vitis vinifera] gi|297738637|emb|CBI27882.3| unnamed protein product [Vitis vinifera]
Unigene13596_DHA_Leaf	TAIR	AT1G79430.2	| Symbols: APL, WDY | Homeodomain-like superfamily protein | chr1:29877521-29879135 REVERSE LENGTH=358
	IRGSP	Os09t0299000-01	Similar to CDPK substrate protein 1.
	nr	ref|XP_003577957.1|	PREDICTED: myb family transcription factor APL-like [Brachypodium distachyon]
Unigene13685_DHA_Leaf	TAIR	AT1G21380.1	| Symbols: | Target of Myb protein 1 | chr1:7485806-7488032 REVERSE LENGTH=506
	IRGSP	Os11t0199700-02	Similar to Seed protein B32E (Fragment).
	nr	gb|EOY16496.1|	Target of Myb protein 1 isoform 1 [Theobroma cacao] gi|508724600|gb|EOY16497.1| Target of Myb protein 1 isoform 1 [Theobroma cacao]
Unigene14328_DHA_Leaf	TAIR	AT1G21700.1	| Symbols: ATSWI3C, CHB4, SWI3C | SWITCH/sucrose nonfermenting 3C | chr1:7620156-7623978 REVERSE LENGTH=807
	IRGSP	Os11t0183700-01	Myb, DNA-binding domain containing protein.
	nr	ref|XP_004142633.1|	PREDICTED: SWI/SNF complex subunit SWI3C-like [Cucumis sativus]
Unigene14383_DHA_Leaf	TAIR	--No_Hits--
	IRGSP	Os02t0104500-01	MYB-like domain containing protein.
	nr	gb|AFW66826.1|	hypothetical protein ZEAMMB73_815554 [Zea mays]
Unigene143_DHA_Leaf	TAIR	AT5G41020.1	| Symbols: | myb family transcription factor | chr5:16425883-16427649 REVERSE LENGTH=588
	IRGSP	Os06t0303700-00	Similar to Myb-like DNA-binding domain containing protein.
	nr	ref|XP_002529443.1|	DNA binding protein, putative [Ricinus communis] gi|223531120|gb|EEF32969.1| DNA binding protein, putative [Ricinus communis]
Unigene14657_DHA_Leaf	TAIR	AT1G49950.1	| Symbols: TRB1, ATTRB1 | telomere repeat binding factor 1 | chr1:18494439-18496713 REVERSE LENGTH=300
	IRGSP	Os01t0589300-01	Similar to Single myb histone 1.
	nr	gb|EMJ03042.1|	hypothetical protein PRUPE_ppa011492mg [Prunus persica]
Unigene14771_DHA_Leaf	TAIR	AT5G05090.1	| Symbols: | Homeodomain-like superfamily protein | chr5:1503393-1504193 FORWARD LENGTH=266
	IRGSP	--No_Hits--
	nr	ref|XP_002871136.1|	myb family transcription factor [Arabidopsis lyrata subsp. lyrata] gi|297316973|gb|EFH47395.1| myb family transcription factor [Arabidopsis lyrata subsp. lyrata]
Unigene14830_DHA_Leaf	TAIR	AT4G32730.2	| Symbols: PC-MYB1, MYB3R-1, ATMYB3R-1, ATMYB3R1 | Homeodomain-like protein | chr4:15791039-15795643 FORWARD LENGTH=995
	IRGSP	Os12t0238000-00	SANT domain, DNA binding domain containing protein.
	nr	ref|XP_002280843.2|	PREDICTED: myb-related protein 3R-1-like [Vitis vinifera]
Unigene14831_DHA_Leaf	TAIR	AT4G32730.2	| Symbols: PC-MYB1, MYB3R-1, ATMYB3R-1, ATMYB3R1 | Homeodomain-like protein | chr4:15791039-15795643 FORWARD LENGTH=995
	IRGSP	Os12t0238000-00	SANT domain, DNA binding domain containing protein.
	nr	gb|EOY29679.1|	Myb domain protein 3r-4, putative [Theobroma cacao]
Unigene15012_DHA_Leaf	TAIR	--No_Hits--
	IRGSP	Os01t0229000-00	Similar to Transcription factor myb.
	nr	gb|EMT17114.1|	Myb-related protein 3R-1 [Aegilops tauschii]
Unigene15054_DHA_Leaf	TAIR	AT5G17300.1	| Symbols: RVE1 | Homeodomain-like superfamily protein | chr5:5690435-5692435 REVERSE LENGTH=387
	IRGSP	Os06t0728700-01	Homeodomain-like containing protein.
	nr	gb|AFW69600.1|	putative MYB DNA-binding domain superfamily protein [Zea mays]
Unigene15627_DHA_Leaf	TAIR	AT3G28910.1	| Symbols: ATMYB30, MYB30 | myb domain protein 30 | chr3:10911443-10912856 FORWARD LENGTH=323
	IRGSP	Os11t0558200-01	Similar to P-type R2R3 Myb protein (Fragment).
	nr	ref|XP_002271738.1|	PREDICTED: myb-related protein 306 [Vitis vinifera] gi|193795735|gb|ACF21938.1| R2R3 MYB60 transcription factor [Vitis vinifera]
Unigene17478_DHA_Leaf	TAIR	AT4G18770.1	| Symbols: MYB98, AtMYB98 | myb domain protein 98 | chr4:10311068-10312557 FORWARD LENGTH=427
	IRGSP	Os06t0162700-01	SANT domain, DNA binding domain containing protein.
	nr	ref|XP_002327678.1|	predicted protein [Populus trichocarpa] gi|222836763|gb|EEE75156.1| predicted protein [Populus trichocarpa]
Unigene18045_DHA_Leaf	TAIR	AT4G18770.1	| Symbols: MYB98, AtMYB98 | myb domain protein 98 | chr4:10311068-10312557 FORWARD LENGTH=427
	IRGSP	Os06t0162700-01	SANT domain, DNA binding domain containing protein.
	nr	ref|XP_004155080.1|	PREDICTED: transcription factor MYB98-like [Cucumis sativus]
Unigene181_DHA_Leaf	TAIR	AT5G52660.1	| Symbols: | Homeodomain-like superfamily protein | chr5:21359423-21362037 REVERSE LENGTH=330
	IRGSP	Os02t0680700-01	Similar to DNA binding protein.
	nr	gb|ABV02070.1|	transcription factor 1R-MYB1 [Chimonanthus praecox]
Unigene18325_DHA_Leaf	TAIR	AT2G47620.1	| Symbols: ATSWI3A, CHB1, SWI3A | SWITCH/sucrose nonfermenting 3A | chr2:19532034-19534251 FORWARD LENGTH=512
	IRGSP	Os04t0480300-01	Myb, DNA-binding domain containing protein.
	nr	gb|EOY22550.1|	Chromatin remodeling complex subunit, putative isoform 5 [Theobroma cacao]
Unigene19159_DHA_Leaf	TAIR	AT1G56160.1	| Symbols: ATMYB72, MYB72 | myb domain protein 72 | chr1:21022384-21023444 FORWARD LENGTH=296
	IRGSP	Os04t0594100-01	Similar to P-type R2R3 Myb protein (Fragment).
	nr	gb|EAZ31836.1|	hypothetical protein OsJ_15997 [Oryza sativa Japonica Group]
Unigene19630_DHA_Leaf	TAIR	AT3G11280.2	| Symbols: | Duplicated homeodomain-like superfamily protein | chr3:3533477-3534393 REVERSE LENGTH=263
	IRGSP	Os01t0853700-01	Similar to MCB1 protein.
	nr	gb|ADE22269.1|	MYB transcription factor [Malus x domestica]
Unigene20047_DHA_Leaf	TAIR	AT3G18100.3	| Symbols: MYB4R1 | myb domain protein 4r1 | chr3:6200689-6204583 FORWARD LENGTH=799
	IRGSP	Os07t0137000-01	Myb transcription factor domain containing protein.
	nr	gb|EOY21191.1|	Myb domain protein 4r1, putative isoform 2 [Theobroma cacao]
Unigene20556_DHA_Leaf	TAIR	AT3G11440.1	| Symbols: ATMYB65, MYB65 | myb domain protein 65 | chr3:3603056-3604929 FORWARD LENGTH=553
	IRGSP	Os03t0578900-00	Similar to MYB1.
	nr	ref|XP_004306467.1|	PREDICTED: transcription factor GAMYB-like [Fragaria vesca subsp. vesca]
Unigene20573_DHA_Leaf	TAIR	AT4G21440.1	| Symbols: ATMYB102, ATM4, MYB102 | MYB-like 102 | chr4:11418425-11419652 REVERSE LENGTH=350
	IRGSP	Os07t0558100-00	Similar to Myb-related transcription factor LBM1.
	nr	emb|CBI40862.3|	unnamed protein product [Vitis vinifera]
Unigene20595_DHA_Leaf	TAIR	AT1G72650.2	| Symbols: TRFL6 | TRF-like 6 | chr1:27350253-27353483 FORWARD LENGTH=630
	IRGSP	Os02t0776700-02	Similar to Single myb histone 6.
	nr	ref|XP_002521340.1|	conserved hypothetical protein [Ricinus communis] gi|223539418|gb|EEF41008.1| conserved hypothetical protein [Ricinus communis]
Unigene20596_DHA_Leaf	TAIR	AT1G72650.2	| Symbols: TRFL6 | TRF-like 6 | chr1:27350253-27353483 FORWARD LENGTH=630
	IRGSP	Os02t0776700-03	Hypothetical conserved gene.
	nr	gb|AFW73719.1|	putative MYB DNA-binding domain superfamily protein [Zea mays]
Unigene21370_DHA_Leaf	TAIR	AT2G36960.2	| Symbols: TKI1 | TSL-kinase interacting protein 1 | chr2:15523552-15527245 FORWARD LENGTH=741
	IRGSP	Os03t0241100-03	Myb, DNA-binding domain containing protein.
	nr	gb|EEC76251.1|	hypothetical protein OsI_13694 [Oryza sativa Indica Group]
Unigene21684_DHA_Leaf	TAIR	AT1G09770.1	| Symbols: ATCDC5, CDC5, ATMYBCDC5 | cell division cycle 5 | chr1:3162002-3165122 FORWARD LENGTH=844
	IRGSP	Os04t0348300-01	Similar to OSIGBa0130K07.8 protein.
	nr	gb|EOY10931.1|	Cell division cycle 5 isoform 3 [Theobroma cacao]
Unigene22383_DHA_Leaf	TAIR	AT1G76890.2	| Symbols: GT2, AT-GT2 | Duplicated homeodomain-like superfamily protein | chr1:28873211-28875203 REVERSE LENGTH=575
	IRGSP	Os02t0104500-01	MYB-like domain containing protein.
	nr	ref|NP_001045613.1|	Os02g0104500 [Oryza sativa Japonica Group] gi|40363766|dbj|BAD06276.1| putative GT-2 factor [Oryza sativa Japonica Group] gi|41052544|dbj|BAD07536.1| putative GT-2 factor [Oryza sativa Japonica Group] gi|113535144|dbj|BAF07527.1| Os02g0104500 [Oryza sativa Japonica Group]
Unigene22739_DHA_Leaf	TAIR	AT5G16880.2	| Symbols: | Target of Myb protein 1 | chr5:5549658-5551274 FORWARD LENGTH=407
	IRGSP	Os02t0697300-01	ENTH/VHS domain containing protein.
	nr	ref|XP_002325818.1|	predicted protein [Populus trichocarpa] gi|222862693|gb|EEF00200.1| predicted protein [Populus trichocarpa]
Unigene22740_DHA_Leaf	TAIR	AT5G16880.2	| Symbols: | Target of Myb protein 1 | chr5:5549658-5551274 FORWARD LENGTH=407
	IRGSP	Os02t0697300-01	ENTH/VHS domain containing protein.
	nr	ref|XP_002285602.1|	PREDICTED: TOM1-like protein 2 [Vitis vinifera]
Unigene24573_DHA_Leaf	TAIR	AT1G32240.1	| Symbols: KAN2 | Homeodomain-like superfamily protein | chr1:11625882-11630355 REVERSE LENGTH=388
	IRGSP	Os08t0160300-00	Similar to KANADI-like transcription factor FEATHERED.
	nr	ref|NP_001147919.1|	KANADI-like transcription factor FEATHERED [Zea mays] gi|195614592|gb|ACG29126.1| KANADI-like transcription factor FEATHERED [Zea mays] gi|413917330|gb|AFW57262.1| putative MYB DNA-binding domain superfamily protein [Zea mays]
Unigene24693_DHA_Leaf	TAIR	AT3G24490.1	| Symbols: | Alcohol dehydrogenase transcription factor Myb/SANT-like family protein | chr3:8911022-8912023 FORWARD LENGTH=333
	IRGSP	Os01t0718900-01	MADF domain domain containing protein.
	nr	ref|XP_002528196.1|	transcription factor, putative [Ricinus communis] gi|223532408|gb|EEF34203.1| transcription factor, putative [Ricinus communis]
Unigene24748_DHA_Leaf	TAIR	AT1G55540.1	| Symbols: emb1011 | Nuclear pore complex protein | chr1:20734759-20743049 REVERSE LENGTH=1816
	IRGSP	--No_Hits--
	nr	gb|EMT14894.1|	Myb family transcription factor APL [Aegilops tauschii]
Unigene24896_DHA_Leaf	TAIR	AT5G02320.2	| Symbols: MYB3R-5 | myb domain protein 3r-5 | chr5:483445-486347 REVERSE LENGTH=548
	IRGSP	Os01t0841500-01	R1R2R3 MYB transcription factor, Stress tolerance
	nr	ref|XP_002456618.1|	hypothetical protein SORBIDRAFT_03g039470 [Sorghum bicolor] gi|241928593|gb|EES01738.1| hypothetical protein SORBIDRAFT_03g039470 [Sorghum bicolor]
Unigene25409_DHA_Leaf	TAIR	AT2G47210.1	| Symbols: | myb-like transcription factor family protein | chr2:19379039-19382204 FORWARD LENGTH=441
	IRGSP	Os05t0540800-01	Homeodomain-like containing protein.
	nr	gb|AFW70679.1|	DNA methyltransferase 1-associated protein 1, partial [Zea mays]
Unigene25410_DHA_Leaf	TAIR	AT2G47210.1	| Symbols: | myb-like transcription factor family protein | chr2:19379039-19382204 FORWARD LENGTH=441
	IRGSP	Os05t0540800-01	Homeodomain-like containing protein.
	nr	gb|EOX95359.1|	Myb-like transcription factor family protein isoform 3 [Theobroma cacao]
Unigene27239_DHA_Leaf	TAIR	AT3G11450.1	| Symbols: | DnaJ domain ;Myb-like DNA-binding domain | chr3:3605459-3607402 REVERSE LENGTH=647
	IRGSP	--No_Hits--
	nr	dbj|BAH15356.1|	gonidia forming protein GlsA [Alstroemeria aurea]
Unigene27693_DHA_Leaf	TAIR	AT3G61600.2	| Symbols: ATPOB1, POB1 | POZ/BTB containin G-protein 1 | chr3:22795704-22798069 FORWARD LENGTH=561
	IRGSP	Os02t0260700-02	Similar to GAMYB-binding protein.
	nr	ref|NP_001142262.1|	uncharacterized protein LOC100274431 [Zea mays] gi|194695220|gb|ACF81694.1| unknown [Zea mays] gi|194707896|gb|ACF88032.1| unknown [Zea mays] gi|238010448|gb|ACR36259.1| unknown [Zea mays] gi|238015458|gb|ACR38764.1| unknown [Zea mays] gi|413936458|gb|AFW71009.1| hypothetical protein ZEAMMB73_641376 [Zea mays]
Unigene28271_DHA_Leaf	TAIR	AT5G18240.4	| Symbols: MYR1 | myb-related protein 1 | chr5:6028617-6030573 REVERSE LENGTH=402
	IRGSP	Os03t0325500-01	Similar to Phosphate starvation regulator protein (Regulatory protein of P- starvation acclimation response Psr1).
	nr	ref|NP_001049984.1|	Os03g0325500 [Oryza sativa Japonica Group] gi|108707913|gb|ABF95708.1| transfactor, putative, expressed [Oryza sativa Japonica Group] gi|113548455|dbj|BAF11898.1| Os03g0325500 [Oryza sativa Japonica Group] gi|125586104|gb|EAZ26768.1| hypothetical protein OsJ_10679 [Oryza sativa Japonica Group]
Unigene29863_DHA_Leaf	TAIR	AT5G41020.1	| Symbols: | myb family transcription factor | chr5:16425883-16427649 REVERSE LENGTH=588
	IRGSP	--No_Hits--
	nr	ref|XP_002282624.1|	PREDICTED: uncharacterized protein LOC100260316 [Vitis vinifera]
Unigene30031_DHA_Leaf	TAIR	AT3G11450.1	| Symbols: | DnaJ domain ;Myb-like DNA-binding domain | chr3:3605459-3607402 REVERSE LENGTH=647
	IRGSP	Os04t0377932-00	Similar to Gonidia forming protein GlsA.
	nr	dbj|BAH15356.1|	gonidia forming protein GlsA [Alstroemeria aurea]
Unigene30450_DHA_Leaf	TAIR	AT4G37260.1	| Symbols: MYB73, ATMYB73 | myb domain protein 73 | chr4:17540602-17541564 FORWARD LENGTH=320
	IRGSP	Os06t0637500-02	Similar to MYB transcription factor R2R3 type.
	nr	gb|EMJ06721.1|	hypothetical protein PRUPE_ppa008450mg [Prunus persica]
Unigene30643_DHA_Leaf	TAIR	AT3G13040.2	| Symbols: | myb-like HTH transcriptional regulator family protein | chr3:4172415-4174456 REVERSE LENGTH=449
	IRGSP	Os06t0703900-02	Homeodomain-like containing protein.
	nr	ref|NP_001058503.1|	Os06g0703900 [Oryza sativa Japonica Group] gi|53791923|dbj|BAD54045.1| putative transfactor [Oryza sativa Japonica Group] gi|113596543|dbj|BAF20417.1| Os06g0703900 [Oryza sativa Japonica Group] gi|215695487|dbj|BAG90678.1| unnamed protein product [Oryza sativa Japonica Group] gi|215765827|dbj|BAG87524.1| unnamed protein product [Oryza sativa Japonica Group] gi|222636186|gb|EEE66318.1| hypothetica…
Unigene30750_DHA_Leaf	TAIR	AT2G23290.1	| Symbols: AtMYB70, MYB70 | myb domain protein 70 | chr2:9904895-9905824 REVERSE LENGTH=309
	IRGSP	Os09t0106700-01	Similar to Myb proto-oncogene protein (C-myb).
	nr	emb|CBI19466.3|	unnamed protein product [Vitis vinifera]
Unigene31835_DHA_Leaf	TAIR	AT3G61600.2	| Symbols: ATPOB1, POB1 | POZ/BTB containin G-protein 1 | chr3:22795704-22798069 FORWARD LENGTH=561
	IRGSP	Os06t0507400-01	Similar to GAMYB-binding protein (Fragment).
	nr	ref|XP_002509901.1|	atpob1, putative [Ricinus communis] gi|223549800|gb|EEF51288.1| atpob1, putative [Ricinus communis]
Unigene32454_DHA_Leaf	TAIR	AT2G47460.1	| Symbols: MYB12, ATMYB12, PFG1 | myb domain protein 12 | chr2:19476438-19479242 FORWARD LENGTH=371
	IRGSP	Os01t0305900-01	Similar to R2R3 Myb transcription factor MYB-IF35.
	nr	ref|XP_002269995.1|	PREDICTED: transcription factor MYB12 [Vitis vinifera] gi|297743957|emb|CBI36927.3| unnamed protein product [Vitis vinifera]
Unigene32581_DHA_Leaf	TAIR	AT1G08810.1	| Symbols: MYB60, AtMYB60 | myb domain protein 60 | chr1:2819279-2820329 REVERSE LENGTH=280
	IRGSP	Os11t0558200-01	Similar to P-type R2R3 Myb protein (Fragment).
	nr	ref|XP_003520923.1|	PREDICTED: myb-related protein 306-like [Glycine max]
Unigene33098_DHA_Leaf	TAIR	AT2G37630.1	| Symbols: ATPHAN, AS1, ATMYB91, MYB91 | myb-like HTH transcriptional regulator family protein | chr2:15781798-15782901 REVERSE LENGTH=367
	IRGSP	Os12t0572000-00	Similar to Protein rough sheath 2 homolog.
	nr	gb|ABF59515.1|	asymmetric leaves 1 [Cardamine hirsuta]
Unigene33356_DHA_Leaf	TAIR	AT1G25550.1	| Symbols: | myb-like transcription factor family protein | chr1:8976644-8977942 FORWARD LENGTH=344
	IRGSP	Os02t0325600-02	Similar to Phosphate starvation response regulator-like protein.
	nr	ref|XP_002281762.2|	PREDICTED: uncharacterized protein LOC100257723 isoform 1 [Vitis vinifera]
Unigene33628_DHA_Leaf	TAIR	AT1G49560.1	| Symbols: | Homeodomain-like superfamily protein | chr1:18342725-18344101 FORWARD LENGTH=333
	IRGSP	Os12t0586300-00	Myb-like DNA-binding domain, SHAQKYF class domain containing protein.
	nr	ref|NP_001067156.1|	Os12g0586300 [Oryza sativa Japonica Group] gi|77556938|gb|ABA99734.1| myb-like DNA-binding domain, SHAQKYF class family protein, expressed [Oryza sativa Japonica Group] gi|113649663|dbj|BAF30175.1| Os12g0586300 [Oryza sativa Japonica Group]
Unigene34088_DHA_Leaf	TAIR	AT2G03500.1	| Symbols: | Homeodomain-like superfamily protein | chr2:1059926-1062259 FORWARD LENGTH=432
	IRGSP	Os01t0176700-01	Myb-like DNA-binding domain, SHAQKYF class domain containing protein.
	nr	ref|XP_004508555.1|	PREDICTED: uncharacterized protein LOC101500047 [Cicer arietinum]
Unigene34474_DHA_Leaf	TAIR	AT2G46260.1	| Symbols: | BTB/POZ/Kelch-associated protein | chr2:18996111-18998463 FORWARD LENGTH=561
	IRGSP	Os02t0260700-02	Similar to GAMYB-binding protein.
	nr	ref|NP_001046484.1|	Os02g0260700 [Oryza sativa Japonica Group] gi|47497899|dbj|BAD20083.1| putative BTB/POZ domain-containing protein [Oryza sativa Japonica Group] gi|47497923|dbj|BAD20129.1| putative BTB/POZ domain-containing protein [Oryza sativa Japonica Group] gi|113536015|dbj|BAF08398.1| Os02g0260700 [Oryza sativa Japonica Group] gi|215704761|dbj|BAG94789.1| unnamed protein product [Oryza sativa Japonica Group]…
Unigene34631_DHA_Leaf	TAIR	AT2G03500.1	| Symbols: | Homeodomain-like superfamily protein | chr2:1059926-1062259 FORWARD LENGTH=432
	IRGSP	Os01t0176700-01	Myb-like DNA-binding domain, SHAQKYF class domain containing protein.
	nr	ref|XP_004508555.1|	PREDICTED: uncharacterized protein LOC101500047 [Cicer arietinum]
Unigene38159_DHA_Leaf	TAIR	--No_Hits--
	IRGSP	--No_Hits--
	nr	gb|AAO49411.1|AF485893_1	MYB2 [Dendrobium sp. XMW-2002-2]
Unigene38299_DHA_Leaf	TAIR	AT5G16770.2	| Symbols: AtMYB9, MYB9 | myb domain protein 9 | chr5:5515209-5516734 FORWARD LENGTH=336
	IRGSP	Os06t0112700-00	Similar to Typical P-type R2R3 Myb protein (Fragment).
	nr	gb|EMT33018.1|	Transcription factor MYB39 [Aegilops tauschii]
Unigene387_DHA_Leaf	TAIR	AT1G66230.1	| Symbols: MYB20, AtMYB20 | myb domain protein 20 | chr1:24677322-24678246 FORWARD LENGTH=282
	IRGSP	Os09t0401000-01	Myb factor.
	nr	gb|ACY74342.1|	putative MYB-related transcription factor [Artemisia annua]
Unigene3905_DHA_Leaf	TAIR	AT5G26660.1	| Symbols: ATMYB86, MYB86 | myb domain protein 86 | chr5:9331775-9333044 REVERSE LENGTH=352
	IRGSP	Os05t0490600-00	OSMYB5.
	nr	gb|AAC13592.1|	Arabidopsis thaliana transcription factor ATYB4 (GB:X95297) [Arabidopsis thaliana]
Unigene4135_DHA_Leaf	TAIR	AT1G09540.1	| Symbols: MYB61, ATMYB61 | myb domain protein 61 | chr1:3086333-3087689 FORWARD LENGTH=366
	IRGSP	Os05t0140100-03	Myb transcription factor domain containing protein.
	nr	ref|XP_004302323.1|	PREDICTED: transcription factor MYB29-like [Fragaria vesca subsp. vesca]
Unigene4325_DHA_Leaf	TAIR	AT1G25550.1	| Symbols: | myb-like transcription factor family protein | chr1:8976644-8977942 FORWARD LENGTH=344
	IRGSP	Os12t0586300-00	Myb-like DNA-binding domain, SHAQKYF class domain containing protein.
	nr	gb|ABF70013.1|	myb DNA-binding domain-containing protein [Musa acuminata]
Unigene4610_DHA_Leaf	TAIR	AT1G08810.1	| Symbols: MYB60, AtMYB60 | myb domain protein 60 | chr1:2819279-2820329 REVERSE LENGTH=280
	IRGSP	--No_Hits--
	nr	--No_Hits--
Unigene4611_DHA_Leaf	TAIR	AT3G28910.1	| Symbols: ATMYB30, MYB30 | myb domain protein 30 | chr3:10911443-10912856 FORWARD LENGTH=323
	IRGSP	Os07t0629000-01	Similar to P-type R2R3 Myb protein (Fragment).
	nr	ref|XP_004236011.1|	PREDICTED: myb-related protein 306-like [Solanum lycopersicum]
Unigene4662_DHA_Leaf	TAIR	AT3G01140.1	| Symbols: MYB106, NOK, AtMYB106 | myb domain protein 106 | chr3:46619-48143 REVERSE LENGTH=388
	IRGSP	Os04t0461000-01	Similar to Myb-related transcription factor LBM1.
	nr	dbj|BAM71806.1|	R2R3-MYB transcription factor [Gentiana triflora]
Unigene4805_DHA_Leaf	TAIR	AT5G62470.2	| Symbols: MYB96 | myb domain protein 96 | chr5:25079434-25080858 REVERSE LENGTH=352
	IRGSP	Os08t0437300-00	Similar to Typical P-type R2R3 Myb protein (Fragment).
	nr	ref|XP_003527079.1|	PREDICTED: myb-related protein 306-like [Glycine max]
Unigene5228_DHA_Leaf	TAIR	AT2G47620.1	| Symbols: ATSWI3A, CHB1, SWI3A | SWITCH/sucrose nonfermenting 3A | chr2:19532034-19534251 FORWARD LENGTH=512
	IRGSP	Os04t0480300-01	Myb, DNA-binding domain containing protein.
	nr	gb|EMT18436.1|	SWI/SNF complex subunit SWI3A [Aegilops tauschii]
Unigene5435_DHA_Leaf	TAIR	AT1G49950.1	| Symbols: TRB1, ATTRB1 | telomere repeat binding factor 1 | chr1:18494439-18496713 REVERSE LENGTH=300
	IRGSP	Os01t0589300-01	Similar to Single myb histone 1.
	nr	ref|XP_003533091.1|	PREDICTED: uncharacterized protein LOC778173 isoform 1 [Glycine max] gi|356529014|ref|XP_003533092.1| PREDICTED: uncharacterized protein LOC778173 isoform 2 [Glycine max]
Unigene6103_DHA_Leaf	TAIR	AT5G16880.2	| Symbols: | Target of Myb protein 1 | chr5:5549658-5551274 FORWARD LENGTH=407
	IRGSP	Os02t0697300-01	ENTH/VHS domain containing protein.
	nr	ref|XP_002285602.1|	PREDICTED: TOM1-like protein 2 [Vitis vinifera]
Unigene629_DHA_Leaf	TAIR	AT2G44430.1	| Symbols: | DNA-binding bromodomain-containing protein | chr2:18333603-18336165 FORWARD LENGTH=646
	IRGSP	Os08t0510700-01	Homeodomain-like containing protein.
	nr	gb|AEV91175.1|	MYB-related protein [Triticum aestivum]
Unigene6421_DHA_Leaf	TAIR	AT2G44430.1	| Symbols: | DNA-binding bromodomain-containing protein | chr2:18333603-18336165 FORWARD LENGTH=646
	IRGSP	Os08t0510700-01	Homeodomain-like containing protein.
	nr	gb|AEV91175.1|	MYB-related protein [Triticum aestivum]
Unigene6620_DHA_Leaf	TAIR	AT2G44730.1	| Symbols: | Alcohol dehydrogenase transcription factor Myb/SANT-like family protein | chr2:18437447-18438565 REVERSE LENGTH=372
	IRGSP	Os10t0564200-01	Homeodomain-like containing protein.
	nr	ref|XP_002270272.1|	PREDICTED: uncharacterized protein LOC100263384 [Vitis vinifera]
Unigene6781_DHA_Leaf	TAIR	AT1G49950.1	| Symbols: TRB1, ATTRB1 | telomere repeat binding factor 1 | chr1:18494439-18496713 REVERSE LENGTH=300
	IRGSP	Os01t0589300-01	Similar to Single myb histone 1.
	nr	ref|XP_002532427.1|	DNA binding protein, putative [Ricinus communis] gi|223527876|gb|EEF29968.1| DNA binding protein, putative [Ricinus communis]
Unigene7751_DHA_Leaf	TAIR	AT2G01060.1	| Symbols: | myb-like HTH transcriptional regulator family protein | chr2:73456-74902 REVERSE LENGTH=286
	IRGSP	Os09t0299200-01	Similar to MYB-CC type transfactor.
	nr	ref|XP_002460002.1|	hypothetical protein SORBIDRAFT_02g020700 [Sorghum bicolor] gi|241923379|gb|EER96523.1| hypothetical protein SORBIDRAFT_02g020700 [Sorghum bicolor]
Unigene7909_DHA_Leaf	TAIR	AT5G52660.2	| Symbols: | Homeodomain-like superfamily protein | chr5:21359423-21362037 REVERSE LENGTH=331
	IRGSP	--No_Hits--
	nr	gb|ACH87169.1|	MYB transcription factor [Camellia sinensis]
Unigene8279_DHA_Leaf	TAIR	AT4G28610.1	| Symbols: PHR1, AtPHR1 | phosphate starvation response 1 | chr4:14133164-14134951 REVERSE LENGTH=409
	IRGSP	Os03t0329900-01	MYB-CC family protein, Pi-starvation signaling
	nr	--No_Hits--
Unigene8320_DHA_Leaf	TAIR	AT4G34430.2	| Symbols: CHB3, ATSWI3D | DNA-binding family protein | chr4:16461069-16464993 FORWARD LENGTH=985
	IRGSP	Os04t0110300-02	Myb, DNA-binding domain containing protein.
	nr	ref|XP_002466552.1|	hypothetical protein SORBIDRAFT_01g009800 [Sorghum bicolor] gi|241920406|gb|EER93550.1| hypothetical protein SORBIDRAFT_01g009800 [Sorghum bicolor]
Unigene8423_DHA_Leaf	TAIR	AT2G36960.3	| Symbols: TKI1 | TSL-kinase interacting protein 1 | chr2:15523552-15527245 FORWARD LENGTH=744
	IRGSP	Os03t0241100-03	Myb, DNA-binding domain containing protein.
	nr	gb|AFW89044.1|	putative MYB DNA-binding domain superfamily protein [Zea mays]
Unigene8480_DHA_Leaf	TAIR	AT3G01140.1	| Symbols: MYB106, NOK, AtMYB106 | myb domain protein 106 | chr3:46619-48143 REVERSE LENGTH=388
	IRGSP	Os04t0461000-01	Similar to Myb-related transcription factor LBM1.
	nr	gb|EOY01854.1|	Myb domain protein 106, putative [Theobroma cacao]
Unigene9476_DHA_Leaf	TAIR	AT1G25550.1	| Symbols: | myb-like transcription factor family protein | chr1:8976644-8977942 FORWARD LENGTH=344
	IRGSP	Os02t0325600-02	Similar to Phosphate starvation response regulator-like protein.
	nr	gb|EMJ24423.1|	hypothetical protein PRUPE_ppa007222mg [Prunus persica]
Unigene9745_DHA_Leaf	TAIR	AT3G28910.1	| Symbols: ATMYB30, MYB30 | myb domain protein 30 | chr3:10911443-10912856 FORWARD LENGTH=323
	IRGSP	Os08t0437300-00	Similar to Typical P-type R2R3 Myb protein (Fragment).
	nr	ref|XP_002284926.1|	PREDICTED: myb-related protein 306 [Vitis vinifera]
Unigene9832_DHA_Leaf	TAIR	AT5G04900.1	| Symbols: NOL | NYC1-like | chr5:1434826-1437194 FORWARD LENGTH=348
	IRGSP	Os03t0654600-01	Similar to Myb-like DNA-binding domain, SHAQKYF class family protein, expressed.
	nr	ref|XP_004511171.1|	PREDICTED: chlorophyll(ide) b reductase NOL, chloroplastic-like [Cicer arietinum]
CL1601.Contig1_F1_Leaf	TAIR	AT1G09540.1	| Symbols: MYB61, ATMYB61 | myb domain protein 61 | chr1:3086333-3087689 FORWARD LENGTH=366
	IRGSP	Os01t0285300-01	Myb transcription factor domain containing protein.
	nr	gb|EOX95482.1|	Myb domain protein 55 [Theobroma cacao]
CL1601.Contig2_F1_Leaf	TAIR	AT4G01680.3	| Symbols: MYB55 | myb domain protein 55 | chr4:716401-717415 REVERSE LENGTH=241
	IRGSP	Os01t0285300-01	Myb transcription factor domain containing protein.
	nr	ref|NP_001242243.1|	MYB transcription factor MYB64 [Glycine max] gi|255642473|gb|ACU21500.1| unknown [Glycine max]
CL1671.Contig1_F1_Leaf	TAIR	AT5G04760.1	| Symbols: | Duplicated homeodomain-like superfamily protein | chr5:1373752-1374529 REVERSE LENGTH=215
	IRGSP	Os05t0442400-01	Similar to MybSt1.
	nr	gb|AEV91177.1|	MYB-related protein [Triticum aestivum]
CL1671.Contig2_F1_Leaf	TAIR	AT5G04760.1	| Symbols: | Duplicated homeodomain-like superfamily protein | chr5:1373752-1374529 REVERSE LENGTH=215
	IRGSP	Os05t0442400-01	Similar to MybSt1.
	nr	gb|AEV91177.1|	MYB-related protein [Triticum aestivum]
CL1777.Contig1_F1_Leaf	TAIR	AT1G06180.1	| Symbols: ATMYB13, ATMYBLFGN, MYB13 | myb domain protein 13 | chr1:1889510-1891089 FORWARD LENGTH=246
	IRGSP	Os02t0624300-01	Similar to Y19 protein.
	nr	gb|AFK39973.1|	unknown [Medicago truncatula]
CL1777.Contig2_F1_Leaf	TAIR	AT1G06180.1	| Symbols: ATMYB13, ATMYBLFGN, MYB13 | myb domain protein 13 | chr1:1889510-1891089 FORWARD LENGTH=246
	IRGSP	Os02t0624300-01	Similar to Y19 protein.
	nr	gb|AFK39973.1|	unknown [Medicago truncatula]
CL1777.Contig3_F1_Leaf	TAIR	AT1G06180.1	| Symbols: ATMYB13, ATMYBLFGN, MYB13 | myb domain protein 13 | chr1:1889510-1891089 FORWARD LENGTH=246
	IRGSP	Os02t0624300-01	Similar to Y19 protein.
	nr	gb|AFK39973.1|	unknown [Medicago truncatula]
CL1777.Contig4_F1_Leaf	TAIR	AT1G06180.1	| Symbols: ATMYB13, ATMYBLFGN, MYB13 | myb domain protein 13 | chr1:1889510-1891089 FORWARD LENGTH=246
	IRGSP	Os02t0624300-01	Similar to Y19 protein.
	nr	gb|AFK39973.1|	unknown [Medicago truncatula]
CL2021.Contig13_F1_Leaf	TAIR	AT4G01280.2	| Symbols: | Homeodomain-like superfamily protein | chr4:535288-536854 FORWARD LENGTH=303
	IRGSP	Os06t0105800-02	Homeodomain-like containing protein.
	nr	gb|ABV02070.1|	transcription factor 1R-MYB1 [Chimonanthus praecox]
CL2021.Contig1_F1_Leaf	TAIR	AT4G01280.1	| Symbols: | Homeodomain-like superfamily protein | chr4:535288-536854 FORWARD LENGTH=302
	IRGSP	Os02t0680700-01	Similar to DNA binding protein.
	nr	gb|AFW76063.1|	putative MYB DNA-binding domain superfamily protein [Zea mays]
CL2021.Contig2_F1_Leaf	TAIR	AT4G01280.2	| Symbols: | Homeodomain-like superfamily protein | chr4:535288-536854 FORWARD LENGTH=303
	IRGSP	Os06t0105800-02	Homeodomain-like containing protein.
	nr	gb|ADL36786.1|	MYBR domain class transcription factor [Malus x domestica]
CL2021.Contig3_F1_Leaf	TAIR	AT4G01280.2	| Symbols: | Homeodomain-like superfamily protein | chr4:535288-536854 FORWARD LENGTH=303
	IRGSP	Os06t0105800-02	Homeodomain-like containing protein.
	nr	gb|ABV02070.1|	transcription factor 1R-MYB1 [Chimonanthus praecox]
CL2021.Contig5_F1_Leaf	TAIR	AT4G01280.2	| Symbols: | Homeodomain-like superfamily protein | chr4:535288-536854 FORWARD LENGTH=303
	IRGSP	Os06t0105800-02	Homeodomain-like containing protein.
	nr	gb|ADL36786.1|	MYBR domain class transcription factor [Malus x domestica]
CL2021.Contig7_F1_Leaf	TAIR	AT5G52660.1	| Symbols: | Homeodomain-like superfamily protein | chr5:21359423-21362037 REVERSE LENGTH=330
	IRGSP	Os02t0680700-01	Similar to DNA binding protein.
	nr	gb|ABV02070.1|	transcription factor 1R-MYB1 [Chimonanthus praecox]
CL2402.Contig1_F1_Leaf	TAIR	AT5G29000.3	| Symbols: PHL1 | Homeodomain-like superfamily protein | chr5:11022336-11024100 REVERSE LENGTH=370
	IRGSP	Os07t0438800-01	MYB-CC family protein, Pi-starvation signaling
	nr	ref|XP_004240480.1|	PREDICTED: protein PHR1-LIKE 1-like [Solanum lycopersicum]
CL2402.Contig2_F1_Leaf	TAIR	AT4G28610.1	| Symbols: PHR1, AtPHR1 | phosphate starvation response 1 | chr4:14133164-14134951 REVERSE LENGTH=409
	IRGSP	Os03t0329900-01	MYB-CC family protein, Pi-starvation signaling
	nr	gb|AFK35281.1|	unknown [Medicago truncatula]
CL2998.Contig1_F1_Leaf	TAIR	AT2G44430.1	| Symbols: | DNA-binding bromodomain-containing protein | chr2:18333603-18336165 FORWARD LENGTH=646
	IRGSP	Os08t0510700-01	Homeodomain-like containing protein.
	nr	gb|AEV91175.1|	MYB-related protein [Triticum aestivum]
CL3563.Contig1_F1_Leaf	TAIR	AT5G17300.1	| Symbols: RVE1 | Homeodomain-like superfamily protein | chr5:5690435-5692435 REVERSE LENGTH=387
	IRGSP	Os06t0728700-01	Homeodomain-like containing protein.
	nr	ref|NP_001146835.1|	LOC100280442 [Zea mays] gi|198444862|gb|ACH88347.1| MYB-like protein E1 [Zea mays]
CL3752.Contig1_F1_Leaf	TAIR	AT3G61600.2	| Symbols: ATPOB1, POB1 | POZ/BTB containin G-protein 1 | chr3:22795704-22798069 FORWARD LENGTH=561
	IRGSP	Os06t0507400-01	Similar to GAMYB-binding protein (Fragment).
	nr	gb|EOX95810.1|	POZ/BTB containin G-protein 1 isoform 6 [Theobroma cacao]
CL3789.Contig1_F1_Leaf	TAIR	AT3G24490.1	| Symbols: | Alcohol dehydrogenase transcription factor Myb/SANT-like family protein | chr3:8911022-8912023 FORWARD LENGTH=333
	IRGSP	Os01t0718900-01	MADF domain domain containing protein.
	nr	ref|XP_002528196.1|	transcription factor, putative [Ricinus communis] gi|223532408|gb|EEF34203.1| transcription factor, putative [Ricinus communis]
CL3789.Contig2_F1_Leaf	TAIR	AT3G24490.1	| Symbols: | Alcohol dehydrogenase transcription factor Myb/SANT-like family protein | chr3:8911022-8912023 FORWARD LENGTH=333
	IRGSP	Os01t0718900-01	MADF domain domain containing protein.
	nr	ref|XP_004141778.1|	PREDICTED: uncharacterized protein LOC101223116 [Cucumis sativus] gi|449522534|ref|XP_004168281.1| PREDICTED: uncharacterized protein LOC101226171 [Cucumis sativus]
CL3821.Contig1_F1_Leaf	TAIR	AT1G09540.1	| Symbols: MYB61, ATMYB61 | myb domain protein 61 | chr1:3086333-3087689 FORWARD LENGTH=366
	IRGSP	Os05t0140100-03	Myb transcription factor domain containing protein.
	nr	gb|AFH03054.1|	R2R3-MYB transcription factor MYB2 [Epimedium sagittatum]
CL3849.Contig1_F1_Leaf	TAIR	AT1G09770.1	| Symbols: ATCDC5, CDC5, ATMYBCDC5 | cell division cycle 5 | chr1:3162002-3165122 FORWARD LENGTH=844
	IRGSP	Os04t0348300-01	Similar to OSIGBa0130K07.8 protein.
	nr	ref|XP_002265478.1|	PREDICTED: cell division cycle 5-like protein [Vitis vinifera]
CL3849.Contig2_F1_Leaf	TAIR	AT1G09770.1	| Symbols: ATCDC5, CDC5, ATMYBCDC5 | cell division cycle 5 | chr1:3162002-3165122 FORWARD LENGTH=844
	IRGSP	Os04t0348300-01	Similar to OSIGBa0130K07.8 protein.
	nr	ref|XP_002265478.1|	PREDICTED: cell division cycle 5-like protein [Vitis vinifera]
CL4093.Contig1_F1_Leaf	TAIR	AT5G16880.2	| Symbols: | Target of Myb protein 1 | chr5:5549658-5551274 FORWARD LENGTH=407
	IRGSP	Os02t0697300-01	ENTH/VHS domain containing protein.
	nr	ref|XP_002285602.1|	PREDICTED: TOM1-like protein 2 [Vitis vinifera]
CL4093.Contig2_F1_Leaf	TAIR	AT5G16880.2	| Symbols: | Target of Myb protein 1 | chr5:5549658-5551274 FORWARD LENGTH=407
	IRGSP	Os02t0697300-01	ENTH/VHS domain containing protein.
	nr	ref|XP_002285602.1|	PREDICTED: TOM1-like protein 2 [Vitis vinifera]
CL4093.Contig3_F1_Leaf	TAIR	AT5G16880.2	| Symbols: | Target of Myb protein 1 | chr5:5549658-5551274 FORWARD LENGTH=407
	IRGSP	Os02t0697300-01	ENTH/VHS domain containing protein.
	nr	ref|XP_002520034.1|	protein transporter, putative [Ricinus communis] gi|223540798|gb|EEF42358.1| protein transporter, putative [Ricinus communis]
CL4241.Contig2_F1_Leaf	TAIR	AT5G52660.1	| Symbols: | Homeodomain-like superfamily protein | chr5:21359423-21362037 REVERSE LENGTH=330
	IRGSP	Os02t0680700-01	Similar to DNA binding protein.
	nr	gb|ABV02070.1|	transcription factor 1R-MYB1 [Chimonanthus praecox]
CL4419.Contig2_F1_Leaf	TAIR	AT4G19110.1	| Symbols: | Protein kinase superfamily protein | chr4:10454770-10457468 REVERSE LENGTH=461
	IRGSP	Os02t0700600-01	Similar to GAMYB-binding protein.
	nr	gb|EOY25312.1|	Kinase superfamily protein isoform 1 [Theobroma cacao] gi|508778057|gb|EOY25313.1| Kinase superfamily protein isoform 1 [Theobroma cacao]
CL4707.Contig1_F1_Leaf	TAIR	AT1G49950.1	| Symbols: TRB1, ATTRB1 | telomere repeat binding factor 1 | chr1:18494439-18496713 REVERSE LENGTH=300
	IRGSP	Os01t0589300-01	Similar to Single myb histone 1.
	nr	ref|XP_003533091.1|	PREDICTED: uncharacterized protein LOC778173 isoform 1 [Glycine max] gi|356529014|ref|XP_003533092.1| PREDICTED: uncharacterized protein LOC778173 isoform 2 [Glycine max]
CL4707.Contig2_F1_Leaf	TAIR	AT1G49950.1	| Symbols: TRB1, ATTRB1 | telomere repeat binding factor 1 | chr1:18494439-18496713 REVERSE LENGTH=300
	IRGSP	Os01t0589300-01	Similar to Single myb histone 1.
	nr	ref|XP_003533091.1|	PREDICTED: uncharacterized protein LOC778173 isoform 1 [Glycine max] gi|356529014|ref|XP_003533092.1| PREDICTED: uncharacterized protein LOC778173 isoform 2 [Glycine max]
CL5133.Contig1_F1_Leaf	TAIR	AT4G38620.1	| Symbols: ATMYB4, MYB4 | myb domain protein 4 | chr4:18053866-18054876 FORWARD LENGTH=282
	IRGSP	Os09t0538400-01	Similar to P-type R2R3 Myb protein (Fragment).
	nr	gb|EOX97694.1|	MYB domain class transcription factor [Theobroma cacao]
CL5133.Contig2_F1_Leaf	TAIR	AT4G38620.1	| Symbols: ATMYB4, MYB4 | myb domain protein 4 | chr4:18053866-18054876 FORWARD LENGTH=282
	IRGSP	Os09t0538400-01	Similar to P-type R2R3 Myb protein (Fragment).
	nr	ref|XP_004147038.1|	PREDICTED: myb-related protein 308-like [Cucumis sativus] gi|449531870|ref|XP_004172908.1| PREDICTED: LOW QUALITY PROTEIN: myb-related protein 308-like [Cucumis sativus]
CL5265.Contig1_F1_Leaf	TAIR	AT2G01060.1	| Symbols: | myb-like HTH transcriptional regulator family protein | chr2:73456-74902 REVERSE LENGTH=286
	IRGSP	Os06t0609500-01	Homeodomain-like containing protein.
	nr	ref|XP_002272588.2|	PREDICTED: uncharacterized protein LOC100248144 [Vitis vinifera]
CL5265.Contig2_F1_Leaf	TAIR	AT2G01060.1	| Symbols: | myb-like HTH transcriptional regulator family protein | chr2:73456-74902 REVERSE LENGTH=286
	IRGSP	Os06t0609500-01	Homeodomain-like containing protein.
	nr	ref|XP_002272588.2|	PREDICTED: uncharacterized protein LOC100248144 [Vitis vinifera]
CL5368.Contig1_F1_Leaf	TAIR	AT4G32730.2	| Symbols: PC-MYB1, MYB3R-1, ATMYB3R-1, ATMYB3R1 | Homeodomain-like protein | chr4:15791039-15795643 FORWARD LENGTH=995
	IRGSP	Os12t0238000-00	SANT domain, DNA binding domain containing protein.
	nr	ref|XP_003636469.1|	C-myb-like transcription factor [Medicago truncatula] gi|355502404|gb|AES83607.1| C-myb-like transcription factor [Medicago truncatula]
CL5379.Contig1_F1_Leaf	TAIR	AT5G02320.2	| Symbols: MYB3R-5 | myb domain protein 3r-5 | chr5:483445-486347 REVERSE LENGTH=548
	IRGSP	Os05t0459000-01	Similar to Gag/env/c-myb protein (Fragment).
	nr	ref|XP_002456618.1|	hypothetical protein SORBIDRAFT_03g039470 [Sorghum bicolor] gi|241928593|gb|EES01738.1| hypothetical protein SORBIDRAFT_03g039470 [Sorghum bicolor]
CL5379.Contig2_F1_Leaf	TAIR	AT5G02320.2	| Symbols: MYB3R-5 | myb domain protein 3r-5 | chr5:483445-486347 REVERSE LENGTH=548
	IRGSP	Os05t0459000-01	Similar to Gag/env/c-myb protein (Fragment).
	nr	ref|XP_002456618.1|	hypothetical protein SORBIDRAFT_03g039470 [Sorghum bicolor] gi|241928593|gb|EES01738.1| hypothetical protein SORBIDRAFT_03g039470 [Sorghum bicolor]
CL5398.Contig1_F1_Leaf	TAIR	AT5G18240.5	| Symbols: MYR1 | myb-related protein 1 | chr5:6028617-6030573 REVERSE LENGTH=400
	IRGSP	Os07t0685300-01	Similar to Phosphate starvation regulator protein (Regulatory protein of P- starvation acclimation response Psr1).
	nr	ref|XP_002467933.1|	hypothetical protein SORBIDRAFT_01g036680 [Sorghum bicolor] gi|241921787|gb|EER94931.1| hypothetical protein SORBIDRAFT_01g036680 [Sorghum bicolor]
CL5398.Contig2_F1_Leaf	TAIR	AT5G18240.5	| Symbols: MYR1 | myb-related protein 1 | chr5:6028617-6030573 REVERSE LENGTH=400
	IRGSP	Os05t0488600-01	Similar to Phosphate starvation regulator protein (Regulatory protein of P- starvation acclimation response Psr1).
	nr	gb|EMT16442.1|	Myb family transcription factor APL [Aegilops tauschii]
CL5635.Contig1_F1_Leaf	TAIR	AT1G49950.1	| Symbols: TRB1, ATTRB1 | telomere repeat binding factor 1 | chr1:18494439-18496713 REVERSE LENGTH=300
	IRGSP	Os12t0613300-02	Similar to Single myb histone 6.
	nr	ref|XP_002525279.1|	Histone H1.1, putative [Ricinus communis] gi|223535437|gb|EEF37107.1| Histone H1.1, putative [Ricinus communis]
CL5635.Contig2_F1_Leaf	TAIR	AT1G49950.1	| Symbols: TRB1, ATTRB1 | telomere repeat binding factor 1 | chr1:18494439-18496713 REVERSE LENGTH=300
	IRGSP	Os12t0613300-02	Similar to Single myb histone 6.
	nr	ref|XP_002525279.1|	Histone H1.1, putative [Ricinus communis] gi|223535437|gb|EEF37107.1| Histone H1.1, putative [Ricinus communis]
CL5635.Contig3_F1_Leaf	TAIR	AT1G49950.1	| Symbols: TRB1, ATTRB1 | telomere repeat binding factor 1 | chr1:18494439-18496713 REVERSE LENGTH=300
	IRGSP	Os12t0613300-02	Similar to Single myb histone 6.
	nr	ref|XP_002525279.1|	Histone H1.1, putative [Ricinus communis] gi|223535437|gb|EEF37107.1| Histone H1.1, putative [Ricinus communis]
CL5855.Contig2_F1_Leaf	TAIR	AT3G11450.1	| Symbols: | DnaJ domain ;Myb-like DNA-binding domain | chr3:3605459-3607402 REVERSE LENGTH=647
	IRGSP	Os04t0377932-00	Similar to Gonidia forming protein GlsA.
	nr	dbj|BAH15356.1|	gonidia forming protein GlsA [Alstroemeria aurea]
CL598.Contig1_F1_Leaf	TAIR	AT3G61600.2	| Symbols: ATPOB1, POB1 | POZ/BTB containin G-protein 1 | chr3:22795704-22798069 FORWARD LENGTH=561
	IRGSP	Os06t0507400-01	Similar to GAMYB-binding protein (Fragment).
	nr	gb|EOX95805.1|	POZ/BTB containin G-protein 1 isoform 1 [Theobroma cacao]
CL598.Contig2_F1_Leaf	TAIR	AT3G61600.2	| Symbols: ATPOB1, POB1 | POZ/BTB containin G-protein 1 | chr3:22795704-22798069 FORWARD LENGTH=561
	IRGSP	Os06t0507400-01	Similar to GAMYB-binding protein (Fragment).
	nr	ref|XP_002279915.1|	PREDICTED: BTB/POZ domain-containing protein POB1-like [Vitis vinifera]
CL598.Contig4_F1_Leaf	TAIR	AT3G61600.2	| Symbols: ATPOB1, POB1 | POZ/BTB containin G-protein 1 | chr3:22795704-22798069 FORWARD LENGTH=561
	IRGSP	Os06t0507400-01	Similar to GAMYB-binding protein (Fragment).
	nr	ref|XP_002509901.1|	atpob1, putative [Ricinus communis] gi|223549800|gb|EEF51288.1| atpob1, putative [Ricinus communis]
CL6279.Contig1_F1_Leaf	TAIR	--No_Hits--
	IRGSP	Os12t0207200-01	Myb/SANT-like domain domain containing protein.
	nr	ref|XP_003518028.1|	PREDICTED: uncharacterized protein At2g29880-like [Glycine max]
CL6632.Contig1_F1_Leaf	TAIR	AT1G21380.1	| Symbols: | Target of Myb protein 1 | chr1:7485806-7488032 REVERSE LENGTH=506
	IRGSP	Os11t0199700-02	Similar to Seed protein B32E (Fragment).
	nr	gb|EOY16496.1|	Target of Myb protein 1 isoform 1 [Theobroma cacao] gi|508724600|gb|EOY16497.1| Target of Myb protein 1 isoform 1 [Theobroma cacao]
CL6773.Contig1_F1_Leaf	TAIR	AT5G04900.1	| Symbols: NOL | NYC1-like | chr5:1434826-1437194 FORWARD LENGTH=348
	IRGSP	Os03t0654600-01	Similar to Myb-like DNA-binding domain, SHAQKYF class family protein, expressed.
	nr	ref|XP_004511171.1|	PREDICTED: chlorophyll(ide) b reductase NOL, chloroplastic-like [Cicer arietinum]
CL6773.Contig2_F1_Leaf	TAIR	AT5G04900.1	| Symbols: NOL | NYC1-like | chr5:1434826-1437194 FORWARD LENGTH=348
	IRGSP	Os03t0654600-01	Similar to Myb-like DNA-binding domain, SHAQKYF class family protein, expressed.
	nr	ref|XP_004511171.1|	PREDICTED: chlorophyll(ide) b reductase NOL, chloroplastic-like [Cicer arietinum]
CL697.Contig1_F1_Leaf	TAIR	AT3G47600.1	| Symbols: MYB94, ATMYBCP70, ATMYB94 | myb domain protein 94 | chr3:17539627-17541035 REVERSE LENGTH=333
	IRGSP	Os07t0629000-01	Similar to P-type R2R3 Myb protein (Fragment).
	nr	gb|EMT05173.1|	Myb-related protein 306 [Aegilops tauschii]
CL697.Contig2_F1_Leaf	TAIR	AT3G47600.1	| Symbols: MYB94, ATMYBCP70, ATMYB94 | myb domain protein 94 | chr3:17539627-17541035 REVERSE LENGTH=333
	IRGSP	Os08t0437300-00	Similar to Typical P-type R2R3 Myb protein (Fragment).
	nr	ref|NP_001242312.1|	uncharacterized protein LOC100807020 [Glycine max] gi|255639323|gb|ACU19959.1| unknown [Glycine max]
CL697.Contig3_F1_Leaf	TAIR	AT4G38620.1	| Symbols: ATMYB4, MYB4 | myb domain protein 4 | chr4:18053866-18054876 FORWARD LENGTH=282
	IRGSP	Os09t0538400-01	Similar to P-type R2R3 Myb protein (Fragment).
	nr	ref|XP_003599668.1|	R2R3-MYB transcription factor [Medicago truncatula] gi|355488716|gb|AES69919.1| R2R3-MYB transcription factor [Medicago truncatula]
CL697.Contig4_F1_Leaf	TAIR	AT5G62470.2	| Symbols: MYB96 | myb domain protein 96 | chr5:25079434-25080858 REVERSE LENGTH=352
	IRGSP	Os08t0437300-00	Similar to Typical P-type R2R3 Myb protein (Fragment).
	nr	ref|XP_003599668.1|	R2R3-MYB transcription factor [Medicago truncatula] gi|355488716|gb|AES69919.1| R2R3-MYB transcription factor [Medicago truncatula]
CL697.Contig5_F1_Leaf	TAIR	AT5G62470.2	| Symbols: MYB96 | myb domain protein 96 | chr5:25079434-25080858 REVERSE LENGTH=352
	IRGSP	Os08t0437300-00	Similar to Typical P-type R2R3 Myb protein (Fragment).
	nr	ref|XP_002284926.1|	PREDICTED: myb-related protein 306 [Vitis vinifera]
CL7006.Contig2_F1_Leaf	TAIR	AT4G13020.3	| Symbols: MHK | Protein kinase superfamily protein | chr4:7604015-7606812 FORWARD LENGTH=444
	IRGSP	Os03t0847600-02	Similar to GAMYB-binding protein.
	nr	ref|NP_001140217.1|	uncharacterized LOC100272250 [Zea mays] gi|194696202|gb|ACF82185.1| unknown [Zea mays] gi|194697258|gb|ACF82713.1| unknown [Zea mays] gi|194698536|gb|ACF83352.1| unknown [Zea mays] gi|195640860|gb|ACG39898.1| serine/threonine-protein kinase MHK [Zea mays] gi|414873921|tpg|DAA52478.1| TPA: putative protein kinase superfamily protein isoform 1 [Zea mays] gi|414873922|tpg|DAA52479.1| TPA: putative p…
Unigene10032_F1_Leaf	TAIR	AT4G01680.3	| Symbols: MYB55 | myb domain protein 55 | chr4:716401-717415 REVERSE LENGTH=241
	IRGSP	Os05t0140100-03	Myb transcription factor domain containing protein.
	nr	gb|AFH03054.1|	R2R3-MYB transcription factor MYB2 [Epimedium sagittatum]
Unigene10085_F1_Leaf	TAIR	AT5G06100.3	| Symbols: MYB33, ATMYB33 | myb domain protein 33 | chr5:1838555-1840386 FORWARD LENGTH=520
	IRGSP	Os01t0812000-03	Similar to cDNA clone:J033109N02, full insert sequence.
	nr	ref|XP_002523208.1|	myb81, putative [Ricinus communis] gi|223537504|gb|EEF39129.1| myb81, putative [Ricinus communis]
Unigene10442_F1_Leaf	TAIR	AT1G21700.1	| Symbols: ATSWI3C, CHB4, SWI3C | SWITCH/sucrose nonfermenting 3C | chr1:7620156-7623978 REVERSE LENGTH=807
	IRGSP	Os11t0183700-01	Myb, DNA-binding domain containing protein.
	nr	dbj|BAJ93481.1|	predicted protein [Hordeum vulgare subsp. vulgare]
Unigene12069_F1_Leaf	TAIR	AT1G25550.1	| Symbols: | myb-like transcription factor family protein | chr1:8976644-8977942 FORWARD LENGTH=344
	IRGSP	Os02t0325600-02	Similar to Phosphate starvation response regulator-like protein.
	nr	ref|XP_002281762.2|	PREDICTED: uncharacterized protein LOC100257723 isoform 1 [Vitis vinifera]
Unigene12808_F1_Leaf	TAIR	AT5G41020.1	| Symbols: | myb family transcription factor | chr5:16425883-16427649 REVERSE LENGTH=588
	IRGSP	--No_Hits--
	nr	ref|XP_002303776.1|	predicted protein [Populus trichocarpa] gi|222841208|gb|EEE78755.1| predicted protein [Populus trichocarpa]
Unigene12809_F1_Leaf	TAIR	AT5G41020.1	| Symbols: | myb family transcription factor | chr5:16425883-16427649 REVERSE LENGTH=588
	IRGSP	Os06t0303700-00	Similar to Myb-like DNA-binding domain containing protein.
	nr	ref|XP_002529443.1|	DNA binding protein, putative [Ricinus communis] gi|223531120|gb|EEF32969.1| DNA binding protein, putative [Ricinus communis]
Unigene13953_F1_Leaf	TAIR	AT2G47460.1	| Symbols: MYB12, ATMYB12, PFG1 | myb domain protein 12 | chr2:19476438-19479242 FORWARD LENGTH=371
	IRGSP	Os01t0305900-01	Similar to R2R3 Myb transcription factor MYB-IF35.
	nr	ref|XP_003565704.1|	PREDICTED: uncharacterized protein LOC100828073 [Brachypodium distachyon]
Unigene14755_F1_Leaf	TAIR	AT5G12870.1	| Symbols: ATMYB46, MYB46 | myb domain protein 46 | chr5:4062939-4064939 REVERSE LENGTH=280
	IRGSP	Os05t0140100-03	Myb transcription factor domain containing protein.
	nr	--No_Hits--
Unigene15472_F1_Leaf	TAIR	AT2G03500.1	| Symbols: | Homeodomain-like superfamily protein | chr2:1059926-1062259 FORWARD LENGTH=432
	IRGSP	Os01t0176700-01	Myb-like DNA-binding domain, SHAQKYF class domain containing protein.
	nr	ref|XP_004139423.1|	PREDICTED: uncharacterized protein LOC101209032 [Cucumis sativus]
Unigene16118_F1_Leaf	TAIR	AT1G01060.4	| Symbols: LHY, LHY1 | Homeodomain-like superfamily protein | chr1:33992-37061 REVERSE LENGTH=644
	IRGSP	Os08t0157600-01	MYB transcription factor, Circadian clock
	nr	ref|XP_002443890.1|	hypothetical protein SORBIDRAFT_07g003870 [Sorghum bicolor] gi|241940240|gb|EES13385.1| hypothetical protein SORBIDRAFT_07g003870 [Sorghum bicolor]
Unigene16119_F1_Leaf	TAIR	AT5G17300.1	| Symbols: RVE1 | Homeodomain-like superfamily protein | chr5:5690435-5692435 REVERSE LENGTH=387
	IRGSP	Os06t0728700-01	Homeodomain-like containing protein.
	nr	ref|NP_001236066.1|	MYB transcription factor MYB177 [Glycine max] gi|110931734|gb|ABH02866.1| MYB transcription factor MYB177 [Glycine max]
Unigene16268_F1_Leaf	TAIR	AT4G32730.2	| Symbols: PC-MYB1, MYB3R-1, ATMYB3R-1, ATMYB3R1 | Homeodomain-like protein | chr4:15791039-15795643 FORWARD LENGTH=995
	IRGSP	Os12t0238000-00	SANT domain, DNA binding domain containing protein.
	nr	ref|XP_002280843.2|	PREDICTED: myb-related protein 3R-1-like [Vitis vinifera]
Unigene16579_F1_Leaf	TAIR	AT2G36960.2	| Symbols: TKI1 | TSL-kinase interacting protein 1 | chr2:15523552-15527245 FORWARD LENGTH=741
	IRGSP	Os03t0241100-03	Myb, DNA-binding domain containing protein.
	nr	ref|XP_004246638.1|	PREDICTED: TSL-kinase interacting protein 1-like [Solanum lycopersicum]
Unigene16804_F1_Leaf	TAIR	--No_Hits--
	IRGSP	Os12t0238000-00	SANT domain, DNA binding domain containing protein.
	nr	ref|XP_002281528.2|	PREDICTED: myb-related protein 3R-1-like [Vitis vinifera]
Unigene17102_F1_Leaf	TAIR	AT1G49950.1	| Symbols: TRB1, ATTRB1 | telomere repeat binding factor 1 | chr1:18494439-18496713 REVERSE LENGTH=300
	IRGSP	Os12t0613300-02	Similar to Single myb histone 6.
	nr	gb|EMJ03042.1|	hypothetical protein PRUPE_ppa011492mg [Prunus persica]
Unigene17732_F1_Leaf	TAIR	AT1G09770.1	| Symbols: ATCDC5, CDC5, ATMYBCDC5 | cell division cycle 5 | chr1:3162002-3165122 FORWARD LENGTH=844
	IRGSP	Os04t0348300-01	Similar to OSIGBa0130K07.8 protein.
	nr	tpg|DAA56048.1|	TPA: myb transcription factor2 [Zea mays]
Unigene17733_F1_Leaf	TAIR	AT1G09770.1	| Symbols: ATCDC5, CDC5, ATMYBCDC5 | cell division cycle 5 | chr1:3162002-3165122 FORWARD LENGTH=844
	IRGSP	Os04t0348300-01	Similar to OSIGBa0130K07.8 protein.
	nr	gb|EOY10931.1|	Cell division cycle 5 isoform 3 [Theobroma cacao]
Unigene20004_F1_Leaf	TAIR	AT5G61620.1	| Symbols: | myb-like transcription factor family protein | chr5:24772383-24773507 FORWARD LENGTH=317
	IRGSP	Os01t0192300-01	Similar to I-box binding factor (Fragment).
	nr	ref|XP_002278155.1|	PREDICTED: transcription factor MYB1R1-like [Vitis vinifera]
Unigene20061_F1_Leaf	TAIR	AT2G44730.1	| Symbols: | Alcohol dehydrogenase transcription factor Myb/SANT-like family protein | chr2:18437447-18438565 REVERSE LENGTH=372
	IRGSP	Os10t0564200-01	Homeodomain-like containing protein.
	nr	ref|XP_002270272.1|	PREDICTED: uncharacterized protein LOC100263384 [Vitis vinifera]
Unigene20385_F1_Leaf	TAIR	AT2G33610.1	| Symbols: ATSWI3B, CHB2, SWI3B | switch subunit 3 | chr2:14229023-14231149 FORWARD LENGTH=469
	IRGSP	Os04t0480300-01	Myb, DNA-binding domain containing protein.
	nr	gb|EAZ22070.1|	hypothetical protein OsJ_05733 [Oryza sativa Japonica Group]
Unigene20440_F1_Leaf	TAIR	AT3G28910.1	| Symbols: ATMYB30, MYB30 | myb domain protein 30 | chr3:10911443-10912856 FORWARD LENGTH=323
	IRGSP	Os07t0629000-01	Similar to P-type R2R3 Myb protein (Fragment).
	nr	ref|XP_004489392.1|	PREDICTED: myb-related protein 306-like [Cicer arietinum]
Unigene20441_F1_Leaf	TAIR	AT3G28910.1	| Symbols: ATMYB30, MYB30 | myb domain protein 30 | chr3:10911443-10912856 FORWARD LENGTH=323
	IRGSP	Os08t0437300-00	Similar to Typical P-type R2R3 Myb protein (Fragment).
	nr	ref|XP_002284926.1|	PREDICTED: myb-related protein 306 [Vitis vinifera]
Unigene20631_F1_Leaf	TAIR	AT1G08810.1	| Symbols: MYB60, AtMYB60 | myb domain protein 60 | chr1:2819279-2820329 REVERSE LENGTH=280
	IRGSP	Os12t0125000-01	Myb factor.
	nr	ref|XP_002271738.1|	PREDICTED: myb-related protein 306 [Vitis vinifera] gi|193795735|gb|ACF21938.1| R2R3 MYB60 transcription factor [Vitis vinifera]
Unigene20632_F1_Leaf	TAIR	AT1G08810.1	| Symbols: MYB60, AtMYB60 | myb domain protein 60 | chr1:2819279-2820329 REVERSE LENGTH=280
	IRGSP	Os12t0125000-01	Myb factor.
	nr	ref|XP_002441752.1|	hypothetical protein SORBIDRAFT_08g001800 [Sorghum bicolor] gi|241942445|gb|EES15590.1| hypothetical protein SORBIDRAFT_08g001800 [Sorghum bicolor]
Unigene21210_F1_Leaf	TAIR	AT1G68670.1	| Symbols: | myb-like transcription factor family protein | chr1:25782344-25783873 FORWARD LENGTH=354
	IRGSP	Os12t0586300-00	Myb-like DNA-binding domain, SHAQKYF class domain containing protein.
	nr	ref|NP_001067156.1|	Os12g0586300 [Oryza sativa Japonica Group] gi|77556938|gb|ABA99734.1| myb-like DNA-binding domain, SHAQKYF class family protein, expressed [Oryza sativa Japonica Group] gi|113649663|dbj|BAF30175.1| Os12g0586300 [Oryza sativa Japonica Group]
Unigene21437_F1_Leaf	TAIR	AT5G05090.1	| Symbols: | Homeodomain-like superfamily protein | chr5:1503393-1504193 FORWARD LENGTH=266
	IRGSP	--No_Hits--
	nr	ref|XP_002871136.1|	myb family transcription factor [Arabidopsis lyrata subsp. lyrata] gi|297316973|gb|EFH47395.1| myb family transcription factor [Arabidopsis lyrata subsp. lyrata]
Unigene21694_F1_Leaf	TAIR	AT5G18240.4	| Symbols: MYR1 | myb-related protein 1 | chr5:6028617-6030573 REVERSE LENGTH=402
	IRGSP	Os03t0325500-01	Similar to Phosphate starvation regulator protein (Regulatory protein of P- starvation acclimation response Psr1).
	nr	ref|XP_002269530.2|	PREDICTED: uncharacterized protein LOC100255052 [Vitis vinifera]
Unigene21988_F1_Leaf	TAIR	AT1G49950.1	| Symbols: TRB1, ATTRB1 | telomere repeat binding factor 1 | chr1:18494439-18496713 REVERSE LENGTH=300
	IRGSP	Os01t0589300-01	Similar to Single myb histone 1.
	nr	gb|EMJ03042.1|	hypothetical protein PRUPE_ppa011492mg [Prunus persica]
Unigene22160_F1_Leaf	TAIR	AT2G01060.1	| Symbols: | myb-like HTH transcriptional regulator family protein | chr2:73456-74902 REVERSE LENGTH=286
	IRGSP	Os09t0299200-01	Similar to MYB-CC type transfactor.
	nr	ref|NP_001062813.1|	Os09g0299200 [Oryza sativa Japonica Group] gi|50725048|dbj|BAD33181.1| putative transfactor [Oryza sativa Japonica Group] gi|50725525|dbj|BAD32994.1| putative transfactor [Oryza sativa Japonica Group] gi|113631046|dbj|BAF24727.1| Os09g0299200 [Oryza sativa Japonica Group] gi|215737042|dbj|BAG95971.1| unnamed protein product [Oryza sativa Japonica Group]
Unigene22162_F1_Leaf	TAIR	AT2G01060.1	| Symbols: | myb-like HTH transcriptional regulator family protein | chr2:73456-74902 REVERSE LENGTH=286
	IRGSP	Os09t0299200-01	Similar to MYB-CC type transfactor.
	nr	ref|XP_002460002.1|	hypothetical protein SORBIDRAFT_02g020700 [Sorghum bicolor] gi|241923379|gb|EER96523.1| hypothetical protein SORBIDRAFT_02g020700 [Sorghum bicolor]
Unigene22199_F1_Leaf	TAIR	AT3G61600.2	| Symbols: ATPOB1, POB1 | POZ/BTB containin G-protein 1 | chr3:22795704-22798069 FORWARD LENGTH=561
	IRGSP	Os06t0507400-01	Similar to GAMYB-binding protein (Fragment).
	nr	gb|ACN26008.1|	unknown [Zea mays] gi|413944056|gb|AFW76705.1| GAMYB-binding protein [Zea mays]
Unigene22200_F1_Leaf	TAIR	AT3G61600.2	| Symbols: ATPOB1, POB1 | POZ/BTB containin G-protein 1 | chr3:22795704-22798069 FORWARD LENGTH=561
	IRGSP	Os02t0260700-01	Similar to GAMYB-binding protein (Fragment).
	nr	ref|XP_002276076.2|	PREDICTED: BTB/POZ domain-containing protein POB1-like [Vitis vinifera]
Unigene22222_F1_Leaf	TAIR	AT4G28610.1	| Symbols: PHR1, AtPHR1 | phosphate starvation response 1 | chr4:14133164-14134951 REVERSE LENGTH=409
	IRGSP	Os03t0329900-01	MYB-CC family protein, Pi-starvation signaling
	nr	--No_Hits--
Unigene22423_F1_Leaf	TAIR	AT5G49620.1	| Symbols: AtMYB78, MYB78 | myb domain protein 78 | chr5:20137491-20139384 REVERSE LENGTH=307
	IRGSP	Os03t0315400-01	Similar to Typical P-type R2R3 Myb protein (Fragment).
	nr	ref|XP_003533124.1|	PREDICTED: uncharacterized protein LOC100805341 [Glycine max]
Unigene22424_F1_Leaf	TAIR	AT5G49620.2	| Symbols: MYB78 | myb domain protein 78 | chr5:20137491-20139384 REVERSE LENGTH=321
	IRGSP	Os03t0315400-01	Similar to Typical P-type R2R3 Myb protein (Fragment).
	nr	ref|XP_004165513.1|	PREDICTED: transcription repressor MYB6-like [Cucumis sativus]
Unigene22921_F1_Leaf	TAIR	AT1G70000.2	| Symbols: | myb-like transcription factor family protein | chr1:26363674-26364635 REVERSE LENGTH=261
	IRGSP	Os08t0151000-00	Similar to Myb-like DNA-binding domain, SHAQKYF class family protein.
	nr	ref|XP_003517881.1|	PREDICTED: transcription factor MYB1R1 [Glycine max]
Unigene23202_F1_Leaf	TAIR	--No_Hits--
	IRGSP	Os03t0274300-01	Similar to Initiator-binding protein.
	nr	gb|AEV91162.1|	MYB-related protein [Aegilops speltoides]
Unigene23550_F1_Leaf	TAIR	AT2G23290.1	| Symbols: AtMYB70, MYB70 | myb domain protein 70 | chr2:9904895-9905824 REVERSE LENGTH=309
	IRGSP	Os09t0106700-01	Similar to Myb proto-oncogene protein (C-myb).
	nr	emb|CBI19466.3|	unnamed protein product [Vitis vinifera]
Unigene24270_F1_Leaf	TAIR	AT1G49950.1	| Symbols: TRB1, ATTRB1 | telomere repeat binding factor 1 | chr1:18494439-18496713 REVERSE LENGTH=300
	IRGSP	Os01t0589300-01	Similar to Single myb histone 1.
	nr	ref|XP_002532427.1|	DNA binding protein, putative [Ricinus communis] gi|223527876|gb|EEF29968.1| DNA binding protein, putative [Ricinus communis]
Unigene24647_F1_Leaf	TAIR	AT3G13040.2	| Symbols: | myb-like HTH transcriptional regulator family protein | chr3:4172415-4174456 REVERSE LENGTH=449
	IRGSP	Os06t0703900-02	Homeodomain-like containing protein.
	nr	ref|NP_001058503.1|	Os06g0703900 [Oryza sativa Japonica Group] gi|53791923|dbj|BAD54045.1| putative transfactor [Oryza sativa Japonica Group] gi|113596543|dbj|BAF20417.1| Os06g0703900 [Oryza sativa Japonica Group] gi|215695487|dbj|BAG90678.1| unnamed protein product [Oryza sativa Japonica Group] gi|215765827|dbj|BAG87524.1| unnamed protein product [Oryza sativa Japonica Group] gi|222636186|gb|EEE66318.1| hypothetica…
Unigene24693_F1_Leaf	TAIR	AT5G49620.1	| Symbols: AtMYB78, MYB78 | myb domain protein 78 | chr5:20137491-20139384 REVERSE LENGTH=307
	IRGSP	Os03t0315400-01	Similar to Typical P-type R2R3 Myb protein (Fragment).
	nr	ref|XP_004229031.1|	PREDICTED: transcription factor MYB21-like [Solanum lycopersicum]
Unigene24937_F1_Leaf	TAIR	AT2G31180.1	| Symbols: ATMYB14, MYB14AT, MYB14 | myb domain protein 14 | chr2:13286806-13288175 REVERSE LENGTH=249
	IRGSP	Os02t0624300-01	Similar to Y19 protein.
	nr	ref|XP_002281274.1|	PREDICTED: myb-related protein Myb4 [Vitis vinifera]
Unigene24938_F1_Leaf	TAIR	AT3G23250.1	| Symbols: MYB15, ATY19, ATMYB15 | myb domain protein 15 | chr3:8309492-8310624 FORWARD LENGTH=285
	IRGSP	Os02t0624300-01	Similar to Y19 protein.
	nr	gb|EMJ23031.1|	hypothetical protein PRUPE_ppa020190mg [Prunus persica]
Unigene24939_F1_Leaf	TAIR	AT2G31180.1	| Symbols: ATMYB14, MYB14AT, MYB14 | myb domain protein 14 | chr2:13286806-13288175 REVERSE LENGTH=249
	IRGSP	Os02t0624300-01	Similar to Y19 protein.
	nr	ref|XP_002281274.1|	PREDICTED: myb-related protein Myb4 [Vitis vinifera]
Unigene24940_F1_Leaf	TAIR	AT3G23250.1	| Symbols: MYB15, ATY19, ATMYB15 | myb domain protein 15 | chr3:8309492-8310624 FORWARD LENGTH=285
	IRGSP	Os02t0624300-01	Similar to Y19 protein.
	nr	gb|EMJ23031.1|	hypothetical protein PRUPE_ppa020190mg [Prunus persica]
Unigene24971_F1_Leaf	TAIR	AT5G47390.1	| Symbols: | myb-like transcription factor family protein | chr5:19227001-19228546 FORWARD LENGTH=365
	IRGSP	Os10t0561400-02	Similar to Transcription factor MYBS3.
	nr	emb|CBY88798.1|	myb transcription factor [Humulus lupulus]
Unigene24972_F1_Leaf	TAIR	AT5G47390.1	| Symbols: | myb-like transcription factor family protein | chr5:19227001-19228546 FORWARD LENGTH=365
	IRGSP	Os10t0561400-02	Similar to Transcription factor MYBS3.
	nr	ref|XP_004508939.1|	PREDICTED: transcription factor MYB1R1-like [Cicer arietinum]
Unigene25407_F1_Leaf	TAIR	AT3G11450.1	| Symbols: | DnaJ domain ;Myb-like DNA-binding domain | chr3:3605459-3607402 REVERSE LENGTH=647
	IRGSP	--No_Hits--
	nr	dbj|BAH15356.1|	gonidia forming protein GlsA [Alstroemeria aurea]
Unigene25408_F1_Leaf	TAIR	AT3G11450.1	| Symbols: | DnaJ domain ;Myb-like DNA-binding domain | chr3:3605459-3607402 REVERSE LENGTH=647
	IRGSP	--No_Hits--
	nr	ref|XP_004146256.1|	PREDICTED: dnaJ homolog subfamily C member 2-like [Cucumis sativus] gi|449495541|ref|XP_004159872.1| PREDICTED: dnaJ homolog subfamily C member 2-like [Cucumis sativus]
Unigene25450_F1_Leaf	TAIR	AT2G44430.1	| Symbols: | DNA-binding bromodomain-containing protein | chr2:18333603-18336165 FORWARD LENGTH=646
	IRGSP	Os08t0510700-01	Homeodomain-like containing protein.
	nr	gb|AEV91175.1|	MYB-related protein [Triticum aestivum]
Unigene26895_F1_Leaf	TAIR	AT5G16600.1	| Symbols: MYB43, AtMYB43 | myb domain protein 43 | chr5:5438291-5440214 FORWARD LENGTH=327
	IRGSP	Os09t0401000-01	Myb factor.
	nr	emb|CBI33476.3|	unnamed protein product [Vitis vinifera]
Unigene27005_F1_Leaf	TAIR	AT1G77180.3	| Symbols: SKIP | chromatin protein family | chr1:28999791-29001632 REVERSE LENGTH=511
	IRGSP	Os02t0759800-01	Similar to GAMYB-binding protein (Fragment).
	nr	ref|NP_001048184.1|	Os02g0759800 [Oryza sativa Japonica Group] gi|47497360|dbj|BAD19399.1| putative GAMYB-binding protein [Oryza sativa Japonica Group] gi|113537715|dbj|BAF10098.1| Os02g0759800 [Oryza sativa Japonica Group] gi|125541209|gb|EAY87604.1| hypothetical protein OsI_09015 [Oryza sativa Indica Group] gi|125583761|gb|EAZ24692.1| hypothetical protein OsJ_08462 [Oryza sativa Japonica Group]
Unigene27029_F1_Leaf	TAIR	AT1G55540.2	| Symbols: emb1011 | Nuclear pore complex protein | chr1:20734759-20743049 REVERSE LENGTH=1819
	IRGSP	--No_Hits--
	nr	gb|EMT14894.1|	Myb family transcription factor APL [Aegilops tauschii]
Unigene27910_F1_Leaf	TAIR	AT5G16880.2	| Symbols: | Target of Myb protein 1 | chr5:5549658-5551274 FORWARD LENGTH=407
	IRGSP	Os02t0697300-01	ENTH/VHS domain containing protein.
	nr	ref|XP_002325818.1|	predicted protein [Populus trichocarpa] gi|222862693|gb|EEF00200.1| predicted protein [Populus trichocarpa]
Unigene28162_F1_Leaf	TAIR	AT4G21440.1	| Symbols: ATMYB102, ATM4, MYB102 | MYB-like 102 | chr4:11418425-11419652 REVERSE LENGTH=350
	IRGSP	Os07t0558100-00	Similar to Myb-related transcription factor LBM1.
	nr	emb|CBI40862.3|	unnamed protein product [Vitis vinifera]
Unigene29204_F1_Leaf	TAIR	AT4G38620.1	| Symbols: ATMYB4, MYB4 | myb domain protein 4 | chr4:18053866-18054876 FORWARD LENGTH=282
	IRGSP	Os09t0538400-01	Similar to P-type R2R3 Myb protein (Fragment).
	nr	gb|EOX97694.1|	MYB domain class transcription factor [Theobroma cacao]
Unigene29312_F1_Leaf	TAIR	AT4G37260.1	| Symbols: MYB73, ATMYB73 | myb domain protein 73 | chr4:17540602-17541564 FORWARD LENGTH=320
	IRGSP	Os06t0637500-02	Similar to MYB transcription factor R2R3 type.
	nr	gb|EMJ06721.1|	hypothetical protein PRUPE_ppa008450mg [Prunus persica]
Unigene30142_F1_Leaf	TAIR	--No_Hits--
	IRGSP	Os02t0104500-01	MYB-like domain containing protein.
	nr	gb|AFW66826.1|	hypothetical protein ZEAMMB73_815554 [Zea mays]
Unigene30182_F1_Leaf	TAIR	AT1G08810.1	| Symbols: MYB60, AtMYB60 | myb domain protein 60 | chr1:2819279-2820329 REVERSE LENGTH=280
	IRGSP	Os11t0558200-01	Similar to P-type R2R3 Myb protein (Fragment).
	nr	ref|XP_003520923.1|	PREDICTED: myb-related protein 306-like [Glycine max]
Unigene30526_F1_Leaf	TAIR	--No_Hits--
	IRGSP	Os01t0229000-00	Similar to Transcription factor myb.
	nr	gb|EMT17114.1|	Myb-related protein 3R-1 [Aegilops tauschii]
Unigene30693_F1_Leaf	TAIR	AT1G25550.1	| Symbols: | myb-like transcription factor family protein | chr1:8976644-8977942 FORWARD LENGTH=344
	IRGSP	Os02t0325600-02	Similar to Phosphate starvation response regulator-like protein.
	nr	ref|XP_002281762.2|	PREDICTED: uncharacterized protein LOC100257723 isoform 1 [Vitis vinifera]
Unigene31648_F1_Leaf	TAIR	AT4G34430.2	| Symbols: CHB3, ATSWI3D | DNA-binding family protein | chr4:16461069-16464993 FORWARD LENGTH=985
	IRGSP	Os04t0110300-02	Myb, DNA-binding domain containing protein.
	nr	ref|XP_003560498.1|	PREDICTED: SWI/SNF complex subunit SWI3D-like [Brachypodium distachyon]
Unigene32667_F1_Leaf	TAIR	AT1G79430.2	| Symbols: APL, WDY | Homeodomain-like superfamily protein | chr1:29877521-29879135 REVERSE LENGTH=358
	IRGSP	Os09t0299000-01	Similar to CDPK substrate protein 1.
	nr	ref|XP_003577957.1|	PREDICTED: myb family transcription factor APL-like [Brachypodium distachyon]
Unigene33792_F1_Leaf	TAIR	AT2G46260.1	| Symbols: | BTB/POZ/Kelch-associated protein | chr2:18996111-18998463 FORWARD LENGTH=561
	IRGSP	Os02t0260700-02	Similar to GAMYB-binding protein.
	nr	ref|NP_001046484.1|	Os02g0260700 [Oryza sativa Japonica Group] gi|47497899|dbj|BAD20083.1| putative BTB/POZ domain-containing protein [Oryza sativa Japonica Group] gi|47497923|dbj|BAD20129.1| putative BTB/POZ domain-containing protein [Oryza sativa Japonica Group] gi|113536015|dbj|BAF08398.1| Os02g0260700 [Oryza sativa Japonica Group] gi|215704761|dbj|BAG94789.1| unnamed protein product [Oryza sativa Japonica Group]…
Unigene34574_F1_Leaf	TAIR	AT3G55730.1	| Symbols: MYB109, AtMYB109 | myb domain protein 109 | chr3:20682114-20683963 REVERSE LENGTH=399
	IRGSP	Os01t0850400-01	Similar to MYBY1 protein (Fragment).
	nr	gb|EMJ20004.1|	hypothetical protein PRUPE_ppa009914mg [Prunus persica]
Unigene37484_F1_Leaf	TAIR	AT5G14340.1	| Symbols: AtMYB40, MYB40 | myb domain protein 40 | chr5:4623367-4624779 FORWARD LENGTH=263
	IRGSP	Os02t0732600-01	Similar to Typical P-type R2R3 Myb protein (Fragment).
	nr	ref|XP_004491748.1|	PREDICTED: myb-related protein 315-like [Cicer arietinum]
Unigene39191_F1_Leaf	TAIR	AT4G00540.2	| Symbols: ATMYB3R2, PC-MYB2, MYB3R-2, MYB3R2 | myb domain protein 3r2 | chr4:235403-237356 REVERSE LENGTH=405
	IRGSP	Os05t0459000-01	Similar to Gag/env/c-myb protein (Fragment).
	nr	gb|EOX96058.1|	Homeodomain-like protein, putative [Theobroma cacao]
Unigene39349_F1_Leaf	TAIR	AT1G76890.2	| Symbols: GT2, AT-GT2 | Duplicated homeodomain-like superfamily protein | chr1:28873211-28875203 REVERSE LENGTH=575
	IRGSP	Os02t0104500-01	MYB-like domain containing protein.
	nr	dbj|BAK61866.1|	GT-like trihelix DNA-binding protein [Citrus unshiu]
Unigene39844_F1_Leaf	TAIR	AT5G08520.1	| Symbols: | Duplicated homeodomain-like superfamily protein | chr5:2755470-2757741 REVERSE LENGTH=298
	IRGSP	Os05t0449900-01	Homeodomain-like containing protein.
	nr	gb|ACG28977.1|	MYB-like transcription factor DIVARICATA [Zea mays] gi|195645206|gb|ACG42071.1| MYB-like transcription factor DIVARICATA [Zea mays]
Unigene4458_F1_Leaf	TAIR	--No_Hits--
	IRGSP	Os03t0241100-03	Myb, DNA-binding domain containing protein.
	nr	tpg|DAA44326.1|	TPA: hypothetical protein ZEAMMB73_008667 [Zea mays]
Unigene4648_F1_Leaf	TAIR	AT1G72650.2	| Symbols: TRFL6 | TRF-like 6 | chr1:27350253-27353483 FORWARD LENGTH=630
	IRGSP	Os02t0776700-03	Hypothetical conserved gene.
	nr	gb|AFW73719.1|	putative MYB DNA-binding domain superfamily protein [Zea mays]
Unigene4853_F1_Leaf	TAIR	AT1G56160.1	| Symbols: ATMYB72, MYB72 | myb domain protein 72 | chr1:21022384-21023444 FORWARD LENGTH=296
	IRGSP	Os02t0695200-02	Similar to P-type R2R3 Myb protein (Fragment).
	nr	ref|NP_001047809.1|	Os02g0695200 [Oryza sativa Japonica Group] gi|41053007|dbj|BAD07916.1| putative myb-related protein 1 [Oryza sativa Japonica Group] gi|41053188|dbj|BAD08151.1| putative myb-related protein 1 [Oryza sativa Japonica Group] gi|113537340|dbj|BAF09723.1| Os02g0695200 [Oryza sativa Japonica Group] gi|125583333|gb|EAZ24264.1| hypothetical protein OsJ_08015 [Oryza sativa Japonica Group]
Unigene4854_F1_Leaf	TAIR	--No_Hits--
	IRGSP	Os04t0594100-01	Similar to P-type R2R3 Myb protein (Fragment).
	nr	gb|EMT20255.1|	Myb-related protein Zm1 [Aegilops tauschii]
Unigene4939_F1_Leaf	TAIR	AT2G37630.1	| Symbols: ATPHAN, AS1, ATMYB91, MYB91 | myb-like HTH transcriptional regulator family protein | chr2:15781798-15782901 REVERSE LENGTH=367
	IRGSP	Os12t0572000-00	Similar to Protein rough sheath 2 homolog.
	nr	ref|NP_001067089.1|	Os12g0572000 [Oryza sativa Japonica Group] gi|75332239|sp|Q94IB1.1|RS2_ORYSJ RecName: Full=Protein rough sheath 2 homolog; AltName: Full=OsPHAN; AltName: Full=OsRS2; AltName: Full=Protein PHANTASTICA homolog gi|14588604|dbj|BAB61618.1| transcription factor rough sheath 2 like protein [Oryza sativa Japonica Group] gi|77556874|gb|ABA99670.1| Myb-like DNA-binding domain containing protein, expressed…
Unigene5261_F1_Leaf	TAIR	AT1G17520.1	| Symbols: | Homeodomain-like/winged-helix DNA-binding family protein | chr1:6024959-6027224 REVERSE LENGTH=296
	IRGSP	Os01t0708000-00	Similar to Single myb histone 4.
	nr	ref|XP_002281183.1|	PREDICTED: uncharacterized protein LOC100254369 [Vitis vinifera] gi|297738637|emb|CBI27882.3| unnamed protein product [Vitis vinifera]
Unigene5331_F1_Leaf	TAIR	AT4G18770.1	| Symbols: MYB98, AtMYB98 | myb domain protein 98 | chr4:10311068-10312557 FORWARD LENGTH=427
	IRGSP	Os06t0162700-01	SANT domain, DNA binding domain containing protein.
	nr	ref|XP_004155080.1|	PREDICTED: transcription factor MYB98-like [Cucumis sativus]
Unigene6322_F1_Leaf	TAIR	AT5G02840.2	| Symbols: LCL1 | LHY/CCA1-like 1 | chr5:648794-651212 FORWARD LENGTH=293
	IRGSP	--No_Hits--
	nr	gb|ACH87169.1|	MYB transcription factor [Camellia sinensis]
Unigene6798_F1_Leaf	TAIR	AT4G34430.2	| Symbols: CHB3, ATSWI3D | DNA-binding family protein | chr4:16461069-16464993 FORWARD LENGTH=985
	IRGSP	Os04t0110300-02	Myb, DNA-binding domain containing protein.
	nr	emb|CBI32576.3|	unnamed protein product [Vitis vinifera]
Unigene6853_F1_Leaf	TAIR	AT3G24120.2	| Symbols: | Homeodomain-like superfamily protein | chr3:8705925-8708148 REVERSE LENGTH=298
	IRGSP	Os08t0346400-02	Similar to Phosphate starvation regulator protein (Regulatory protein of P- starvation acclimation response Psr1).
	nr	tpg|DAA49235.1|	TPA: putative MYB DNA-binding domain superfamily protein [Zea mays]
Unigene6896_F1_Leaf	TAIR	AT2G47210.1	| Symbols: | myb-like transcription factor family protein | chr2:19379039-19382204 FORWARD LENGTH=441
	IRGSP	Os05t0540800-01	Homeodomain-like containing protein.
	nr	gb|AFW70679.1|	DNA methyltransferase 1-associated protein 1, partial [Zea mays]
Unigene930_F1_Leaf	TAIR	AT2G47210.1	| Symbols: | myb-like transcription factor family protein | chr2:19379039-19382204 FORWARD LENGTH=441
	IRGSP	Os05t0540800-01	Homeodomain-like containing protein.
	nr	ref|NP_001056183.1|	Os05g0540800 [Oryza sativa Japonica Group] gi|55908872|gb|AAV67815.1| unknown protein [Oryza sativa Japonica Group] gi|113579734|dbj|BAF18097.1| Os05g0540800 [Oryza sativa Japonica Group] gi|218197189|gb|EEC79616.1| hypothetical protein OsI_20813 [Oryza sativa Indica Group]
Unigene9339_F1_Leaf	TAIR	AT2G03500.1	| Symbols: | Homeodomain-like superfamily protein | chr2:1059926-1062259 FORWARD LENGTH=432
	IRGSP	Os12t0586300-00	Myb-like DNA-binding domain, SHAQKYF class domain containing protein.
	nr	gb|ABF70013.1|	myb DNA-binding domain-containing protein [Musa acuminata]
CL1064.Contig3_A.roylei_Leaf	TAIR	AT5G52660.2	| Symbols: | Homeodomain-like superfamily protein | chr5:21359423-21362037 REVERSE LENGTH=331
	IRGSP	Os02t0680700-01	Similar to DNA binding protein.
	nr	ref|XP_003622487.1|	MYB transcription factor MYB146 [Medicago truncatula] gi|355497502|gb|AES78705.1| MYB transcription factor MYB146 [Medicago truncatula]
CL1064.Contig5_A.roylei_Leaf	TAIR	AT4G01280.1	| Symbols: | Homeodomain-like superfamily protein | chr4:535288-536854 FORWARD LENGTH=302
	IRGSP	Os02t0680700-01	Similar to DNA binding protein.
	nr	gb|ABV02070.1|	transcription factor 1R-MYB1 [Chimonanthus praecox]
CL1064.Contig6_A.roylei_Leaf	TAIR	AT4G01280.1	| Symbols: | Homeodomain-like superfamily protein | chr4:535288-536854 FORWARD LENGTH=302
	IRGSP	Os02t0680700-01	Similar to DNA binding protein.
	nr	gb|ABV02070.1|	transcription factor 1R-MYB1 [Chimonanthus praecox]
CL1626.Contig1_A.roylei_Leaf	TAIR	AT1G06180.1	| Symbols: ATMYB13, ATMYBLFGN, MYB13 | myb domain protein 13 | chr1:1889510-1891089 FORWARD LENGTH=246
	IRGSP	Os02t0624300-01	Similar to Y19 protein.
	nr	dbj|BAA81732.1|	GmMYB29A2 [Glycine max]
CL1626.Contig2_A.roylei_Leaf	TAIR	AT3G23250.1	| Symbols: MYB15, ATY19, ATMYB15 | myb domain protein 15 | chr3:8309492-8310624 FORWARD LENGTH=285
	IRGSP	Os02t0624300-01	Similar to Y19 protein.
	nr	ref|NP_001053318.1|	Os04g0517100 [Oryza sativa Japonica Group] gi|73921025|sp|Q7XBH4.2|MYB4_ORYSJ RecName: Full=Myb-related protein Myb4; AltName: Full=OsMyb4; AltName: Full=Transcription factor RLTR1 gi|1946265|emb|CAA72217.1| myb [Oryza sativa Japonica Group] gi|38347423|emb|CAE05446.2| OSJNBa0073E02.6 [Oryza sativa Japonica Group] gi|113564889|dbj|BAF15232.1| Os04g0517100 [Oryza sativa Japonica Group] gi|11631021…
CL1626.Contig3_A.roylei_Leaf	TAIR	AT3G23250.1	| Symbols: MYB15, ATY19, ATMYB15 | myb domain protein 15 | chr3:8309492-8310624 FORWARD LENGTH=285
	IRGSP	Os02t0624300-01	Similar to Y19 protein.
	nr	ref|XP_004247733.1|	PREDICTED: myb-related protein Myb4-like [Solanum lycopersicum]
CL2077.Contig1_A.roylei_Leaf	TAIR	AT4G13020.3	| Symbols: MHK | Protein kinase superfamily protein | chr4:7604015-7606812 FORWARD LENGTH=444
	IRGSP	Os03t0847600-02	Similar to GAMYB-binding protein.
	nr	ref|NP_001140217.1|	uncharacterized LOC100272250 [Zea mays] gi|194696202|gb|ACF82185.1| unknown [Zea mays] gi|194697258|gb|ACF82713.1| unknown [Zea mays] gi|194698536|gb|ACF83352.1| unknown [Zea mays] gi|195640860|gb|ACG39898.1| serine/threonine-protein kinase MHK [Zea mays] gi|414873921|tpg|DAA52478.1| TPA: putative protein kinase superfamily protein isoform 1 [Zea mays] gi|414873922|tpg|DAA52479.1| TPA: putative p…
CL2170.Contig1_A.roylei_Leaf	TAIR	AT2G47210.1	| Symbols: | myb-like transcription factor family protein | chr2:19379039-19382204 FORWARD LENGTH=441
	IRGSP	Os05t0540800-01	Homeodomain-like containing protein.
	nr	ref|XP_002278881.1|	PREDICTED: SWR1-complex protein 4 [Vitis vinifera] gi|297744019|emb|CBI36989.3| unnamed protein product [Vitis vinifera]
CL2202.Contig1_A.roylei_Leaf	TAIR	AT3G47600.1	| Symbols: MYB94, ATMYBCP70, ATMYB94 | myb domain protein 94 | chr3:17539627-17541035 REVERSE LENGTH=333
	IRGSP	Os08t0437300-00	Similar to Typical P-type R2R3 Myb protein (Fragment).
	nr	gb|AGG69481.1|	MYB1 protein [Paeonia suffruticosa]
CL2202.Contig2_A.roylei_Leaf	TAIR	AT3G47600.1	| Symbols: MYB94, ATMYBCP70, ATMYB94 | myb domain protein 94 | chr3:17539627-17541035 REVERSE LENGTH=333
	IRGSP	Os08t0437300-00	Similar to Typical P-type R2R3 Myb protein (Fragment).
	nr	ref|XP_002514763.1|	r2r3-myb transcription factor, putative [Ricinus communis] gi|223546367|gb|EEF47869.1| r2r3-myb transcription factor, putative [Ricinus communis]
CL2560.Contig1_A.roylei_Leaf	TAIR	AT1G01060.4	| Symbols: LHY, LHY1 | Homeodomain-like superfamily protein | chr1:33992-37061 REVERSE LENGTH=644
	IRGSP	Os08t0157600-01	MYB transcription factor, Circadian clock
	nr	gb|EOX95556.1|	Homeodomain-like superfamily protein isoform 5 [Theobroma cacao] gi|508703664|gb|EOX95560.1| Homeodomain-like superfamily protein isoform 5 [Theobroma cacao] gi|508703665|gb|EOX95561.1| Homeodomain-like superfamily protein isoform 5 [Theobroma cacao]
CL2668.Contig1_A.roylei_Leaf	TAIR	AT2G01060.1	| Symbols: | myb-like HTH transcriptional regulator family protein | chr2:73456-74902 REVERSE LENGTH=286
	IRGSP	Os06t0609500-01	Homeodomain-like containing protein.
	nr	ref|XP_002272588.2|	PREDICTED: uncharacterized protein LOC100248144 [Vitis vinifera]
CL2668.Contig2_A.roylei_Leaf	TAIR	AT2G01060.1	| Symbols: | myb-like HTH transcriptional regulator family protein | chr2:73456-74902 REVERSE LENGTH=286
	IRGSP	Os06t0609500-01	Homeodomain-like containing protein.
	nr	ref|XP_002272588.2|	PREDICTED: uncharacterized protein LOC100248144 [Vitis vinifera]
CL2668.Contig3_A.roylei_Leaf	TAIR	AT2G01060.1	| Symbols: | myb-like HTH transcriptional regulator family protein | chr2:73456-74902 REVERSE LENGTH=286
	IRGSP	Os09t0299200-01	Similar to MYB-CC type transfactor.
	nr	ref|XP_004293429.1|	PREDICTED: uncharacterized protein LOC101309129 isoform 1 [Fragaria vesca subsp. vesca]
CL2668.Contig4_A.roylei_Leaf	TAIR	AT2G01060.1	| Symbols: | myb-like HTH transcriptional regulator family protein | chr2:73456-74902 REVERSE LENGTH=286
	IRGSP	Os09t0299200-01	Similar to MYB-CC type transfactor.
	nr	ref|XP_004293429.1|	PREDICTED: uncharacterized protein LOC101309129 isoform 1 [Fragaria vesca subsp. vesca]
CL2749.Contig1_A.roylei_Leaf	TAIR	AT4G38620.1	| Symbols: ATMYB4, MYB4 | myb domain protein 4 | chr4:18053866-18054876 FORWARD LENGTH=282
	IRGSP	Os09t0538400-01	Similar to P-type R2R3 Myb protein (Fragment).
	nr	gb|EOY17258.1|	Myb domain protein 3, putative [Theobroma cacao]
CL2749.Contig2_A.roylei_Leaf	TAIR	AT4G38620.1	| Symbols: ATMYB4, MYB4 | myb domain protein 4 | chr4:18053866-18054876 FORWARD LENGTH=282
	IRGSP	Os09t0538400-01	Similar to P-type R2R3 Myb protein (Fragment).
	nr	ref|XP_004231034.1|	PREDICTED: myb-related protein 308-like [Solanum lycopersicum]
CL2844.Contig1_A.roylei_Leaf	TAIR	AT3G05380.4	| Symbols: ALY2 | DIRP ;Myb-like DNA-binding domain | chr3:1540562-1546139 FORWARD LENGTH=1052
	IRGSP	Os01t0193900-01	Homeodomain-like domain containing protein.
	nr	gb|AAT77870.1|	expressed protein [Oryza sativa Japonica Group]
CL2844.Contig2_A.roylei_Leaf	TAIR	AT3G05380.4	| Symbols: ALY2 | DIRP ;Myb-like DNA-binding domain | chr3:1540562-1546139 FORWARD LENGTH=1052
	IRGSP	Os01t0193900-01	Homeodomain-like domain containing protein.
	nr	gb|AAT77870.1|	expressed protein [Oryza sativa Japonica Group]
CL2897.Contig1_A.roylei_Leaf	TAIR	AT5G49620.1	| Symbols: AtMYB78, MYB78 | myb domain protein 78 | chr5:20137491-20139384 REVERSE LENGTH=307
	IRGSP	Os03t0315400-01	Similar to Typical P-type R2R3 Myb protein (Fragment).
	nr	ref|XP_004229031.1|	PREDICTED: transcription factor MYB21-like [Solanum lycopersicum]
CL2912.Contig1_A.roylei_Leaf	TAIR	AT5G04900.1	| Symbols: NOL | NYC1-like | chr5:1434826-1437194 FORWARD LENGTH=348
	IRGSP	Os03t0654600-01	Similar to Myb-like DNA-binding domain, SHAQKYF class family protein, expressed.
	nr	ref|XP_004511171.1|	PREDICTED: chlorophyll(ide) b reductase NOL, chloroplastic-like [Cicer arietinum]
CL2912.Contig2_A.roylei_Leaf	TAIR	AT5G04900.1	| Symbols: NOL | NYC1-like | chr5:1434826-1437194 FORWARD LENGTH=348
	IRGSP	Os03t0654600-01	Similar to Myb-like DNA-binding domain, SHAQKYF class family protein, expressed.
	nr	ref|XP_004306432.1|	PREDICTED: chlorophyll(ide) b reductase NOL, chloroplastic-like [Fragaria vesca subsp. vesca]
CL3212.Contig1_A.roylei_Leaf	TAIR	AT4G18770.1	| Symbols: MYB98, AtMYB98 | myb domain protein 98 | chr4:10311068-10312557 FORWARD LENGTH=427
	IRGSP	Os06t0162700-01	SANT domain, DNA binding domain containing protein.
	nr	ref|XP_004242162.1|	PREDICTED: uncharacterized protein LOC101255008 [Solanum lycopersicum]
CL3402.Contig1_A.roylei_Leaf	TAIR	AT4G28610.1	| Symbols: PHR1, AtPHR1 | phosphate starvation response 1 | chr4:14133164-14134951 REVERSE LENGTH=409
	IRGSP	Os07t0438800-01	MYB-CC family protein, Pi-starvation signaling
	nr	ref|XP_004493814.1|	PREDICTED: protein PHR1-LIKE 1-like isoform X1 [Cicer arietinum] gi|502110165|ref|XP_004493815.1| PREDICTED: protein PHR1-LIKE 1-like isoform X2 [Cicer arietinum]
CL3402.Contig2_A.roylei_Leaf	TAIR	AT4G28610.1	| Symbols: PHR1, AtPHR1 | phosphate starvation response 1 | chr4:14133164-14134951 REVERSE LENGTH=409
	IRGSP	Os03t0329900-01	MYB-CC family protein, Pi-starvation signaling
	nr	gb|AFK35281.1|	unknown [Medicago truncatula]
CL3453.Contig1_A.roylei_Leaf	TAIR	AT2G46260.1	| Symbols: | BTB/POZ/Kelch-associated protein | chr2:18996111-18998463 FORWARD LENGTH=561
	IRGSP	Os02t0260700-01	Similar to GAMYB-binding protein (Fragment).
	nr	ref|XP_002276076.2|	PREDICTED: BTB/POZ domain-containing protein POB1-like [Vitis vinifera]
CL3453.Contig2_A.roylei_Leaf	TAIR	AT3G61600.2	| Symbols: ATPOB1, POB1 | POZ/BTB containin G-protein 1 | chr3:22795704-22798069 FORWARD LENGTH=561
	IRGSP	Os06t0507400-01	Similar to GAMYB-binding protein (Fragment).
	nr	gb|EOX95806.1|	POZ/BTB containin G-protein 1 isoform 2 [Theobroma cacao]
CL3611.Contig1_A.roylei_Leaf	TAIR	AT5G04760.1	| Symbols: | Duplicated homeodomain-like superfamily protein | chr5:1373752-1374529 REVERSE LENGTH=215
	IRGSP	Os05t0442400-01	Similar to MybSt1.
	nr	gb|AEV91177.1|	MYB-related protein [Triticum aestivum]
CL3611.Contig2_A.roylei_Leaf	TAIR	AT5G04760.1	| Symbols: | Duplicated homeodomain-like superfamily protein | chr5:1373752-1374529 REVERSE LENGTH=215
	IRGSP	Os05t0442400-01	Similar to MybSt1.
	nr	ref|NP_196096.1|	duplicated SANT DNA-binding domain-containing protein [Arabidopsis thaliana] gi|7413538|emb|CAB86018.1| I-box binding factor-like protein [Arabidopsis thaliana] gi|9758451|dbj|BAB08980.1| I-box binding factor-like protein [Arabidopsis thaliana] gi|15293085|gb|AAK93653.1| putative I-box binding factor [Arabidopsis thaliana] gi|20258889|gb|AAM14116.1| putative I-box binding factor [Arabidopsis thal…
CL4339.Contig1_A.roylei_Leaf	TAIR	AT4G19110.1	| Symbols: | Protein kinase superfamily protein | chr4:10454770-10457468 REVERSE LENGTH=461
	IRGSP	Os02t0700600-01	Similar to GAMYB-binding protein.
	nr	gb|EOY25312.1|	Kinase superfamily protein isoform 1 [Theobroma cacao] gi|508778057|gb|EOY25313.1| Kinase superfamily protein isoform 1 [Theobroma cacao]
CL4761.Contig1_A.roylei_Leaf	TAIR	AT1G06180.1	| Symbols: ATMYB13, ATMYBLFGN, MYB13 | myb domain protein 13 | chr1:1889510-1891089 FORWARD LENGTH=246
	IRGSP	Os02t0624300-01	Similar to Y19 protein.
	nr	gb|AFK39973.1|	unknown [Medicago truncatula]
CL4761.Contig2_A.roylei_Leaf	TAIR	AT1G06180.1	| Symbols: ATMYB13, ATMYBLFGN, MYB13 | myb domain protein 13 | chr1:1889510-1891089 FORWARD LENGTH=246
	IRGSP	Os02t0624300-01	Similar to Y19 protein.
	nr	gb|AFK39973.1|	unknown [Medicago truncatula]
CL48.Contig3_A.roylei_Leaf	TAIR	AT3G11450.1	| Symbols: | DnaJ domain ;Myb-like DNA-binding domain | chr3:3605459-3607402 REVERSE LENGTH=647
	IRGSP	--No_Hits--
	nr	dbj|BAH15356.1|	gonidia forming protein GlsA [Alstroemeria aurea]
CL48.Contig4_A.roylei_Leaf	TAIR	AT3G11450.1	| Symbols: | DnaJ domain ;Myb-like DNA-binding domain | chr3:3605459-3607402 REVERSE LENGTH=647
	IRGSP	--No_Hits--
	nr	dbj|BAH15356.1|	gonidia forming protein GlsA [Alstroemeria aurea]
CL5132.Contig1_A.roylei_Leaf	TAIR	AT4G01680.3	| Symbols: MYB55 | myb domain protein 55 | chr4:716401-717415 REVERSE LENGTH=241
	IRGSP	Os01t0285300-01	Myb transcription factor domain containing protein.
	nr	ref|XP_003626082.1|	R2R3-MYB transcription factor [Medicago truncatula] gi|217074302|gb|ACJ85511.1| unknown [Medicago truncatula] gi|355501097|gb|AES82300.1| R2R3-MYB transcription factor [Medicago truncatula] gi|388518419|gb|AFK47271.1| unknown [Medicago truncatula]
CL5132.Contig2_A.roylei_Leaf	TAIR	AT4G01680.3	| Symbols: MYB55 | myb domain protein 55 | chr4:716401-717415 REVERSE LENGTH=241
	IRGSP	Os05t0140100-03	Myb transcription factor domain containing protein.
	nr	gb|AFH03054.1|	R2R3-MYB transcription factor MYB2 [Epimedium sagittatum]
CL5419.Contig1_A.roylei_Leaf	TAIR	AT1G70000.2	| Symbols: | myb-like transcription factor family protein | chr1:26363674-26364635 REVERSE LENGTH=261
	IRGSP	Os08t0151000-00	Similar to Myb-like DNA-binding domain, SHAQKYF class family protein.
	nr	ref|XP_002511478.1|	DNA binding protein, putative [Ricinus communis] gi|223550593|gb|EEF52080.1| DNA binding protein, putative [Ricinus communis]
CL5470.Contig1_A.roylei_Leaf	TAIR	AT1G55540.1	| Symbols: emb1011 | Nuclear pore complex protein | chr1:20734759-20743049 REVERSE LENGTH=1816
	IRGSP	Os07t0685400-01	Conserved hypothetical protein.
	nr	gb|EMT14894.1|	Myb family transcription factor APL [Aegilops tauschii]
CL5470.Contig2_A.roylei_Leaf	TAIR	AT1G55540.1	| Symbols: emb1011 | Nuclear pore complex protein | chr1:20734759-20743049 REVERSE LENGTH=1816
	IRGSP	--No_Hits--
	nr	gb|EMT14894.1|	Myb family transcription factor APL [Aegilops tauschii]
CL5602.Contig1_A.roylei_Leaf	TAIR	AT5G16880.2	| Symbols: | Target of Myb protein 1 | chr5:5549658-5551274 FORWARD LENGTH=407
	IRGSP	Os02t0697300-01	ENTH/VHS domain containing protein.
	nr	ref|XP_002285602.1|	PREDICTED: TOM1-like protein 2 [Vitis vinifera]
CL5602.Contig2_A.roylei_Leaf	TAIR	AT5G16880.2	| Symbols: | Target of Myb protein 1 | chr5:5549658-5551274 FORWARD LENGTH=407
	IRGSP	Os02t0697300-01	ENTH/VHS domain containing protein.
	nr	ref|XP_002285602.1|	PREDICTED: TOM1-like protein 2 [Vitis vinifera]
CL5695.Contig1_A.roylei_Leaf	TAIR	AT4G32730.2	| Symbols: PC-MYB1, MYB3R-1, ATMYB3R-1, ATMYB3R1 | Homeodomain-like protein | chr4:15791039-15795643 FORWARD LENGTH=995
	IRGSP	Os12t0238000-00	SANT domain, DNA binding domain containing protein.
	nr	ref|XP_004136432.1|	PREDICTED: myb-related protein 3R-1-like [Cucumis sativus]
CL5805.Contig1_A.roylei_Leaf	TAIR	AT1G49950.1	| Symbols: TRB1, ATTRB1 | telomere repeat binding factor 1 | chr1:18494439-18496713 REVERSE LENGTH=300
	IRGSP	Os12t0613300-02	Similar to Single myb histone 6.
	nr	ref|XP_002525279.1|	Histone H1.1, putative [Ricinus communis] gi|223535437|gb|EEF37107.1| Histone H1.1, putative [Ricinus communis]
CL852.Contig1_A.roylei_Leaf	TAIR	AT1G21380.1	| Symbols: | Target of Myb protein 1 | chr1:7485806-7488032 REVERSE LENGTH=506
	IRGSP	Os11t0199700-02	Similar to Seed protein B32E (Fragment).
	nr	gb|EOY16496.1|	Target of Myb protein 1 isoform 1 [Theobroma cacao] gi|508724600|gb|EOY16497.1| Target of Myb protein 1 isoform 1 [Theobroma cacao]
Unigene10646_A.roylei_Leaf	TAIR	AT4G34430.2	| Symbols: CHB3, ATSWI3D | DNA-binding family protein | chr4:16461069-16464993 FORWARD LENGTH=985
	IRGSP	Os04t0110300-02	Myb, DNA-binding domain containing protein.
	nr	emb|CBI32576.3|	unnamed protein product [Vitis vinifera]
Unigene11490_A.roylei_Leaf	TAIR	AT3G13340.2	| Symbols: | Transducin/WD40 repeat-like superfamily protein | chr3:4332370-4334603 FORWARD LENGTH=447
	IRGSP	Os08t0497600-01	WD40 repeat-like domain containing protein.
[truncated: 3,988 more rows]

## Sheet: Dof
ID	DB	AC	Annotation
CL6321.Contig1_DHA_Bulb	TAIR	AT1G64620.1	| Symbols: | Dof-type zinc finger DNA-binding family protein | chr1:24007288-24008460 FORWARD LENGTH=352
	IRGSP	Os04t0567800-01	Similar to OSIGBa0103M18.3 protein.
	nr	ref|NP_001236777.1|	Dof21 [Glycine max] gi|112363396|gb|ABI16022.1| Dof21 [Glycine max]
[truncated: 876 more rows]

## Sheet: MADS-BOX
ID	DB	AC	Annotation
[truncated: 516 more rows]

## Sheet: AP2-ERF
ID	DB	AC	Annotation
[truncated: 2,589 more rows]

## Sheet: HSF
ID	DB	AC	Annotation
[truncated: 765 more rows]

## Sheet: ARF2
ID	DB	AC	Annotation
[truncated: 369 more rows]

## Sheet: ARF1
ID	DB	AC	Annotation
[truncated: 285 more rows]

[truncated: 8 more sheets: C2H2-type zinc finger, NAC, Whirly, CAMTA, Trihelix, GATA type Zinc finger, LFY, Basic-leucine zipper]
